# Supplementary material for: Isolation, identification and in vivo antihypertensive effect of novel angiotensin I-converting enzyme (ACE) inhibitory peptides from Spirulina protein hydrolysate
Source: Royal Society of Chemistry journal article supplement (doi:10.1039/d2fo01207c), 2022-01-01
Supplement: d2fo01207c1.pdf [file d2fo01207c1.pdf]

# **Identification, characterization and in vivo antihypertensive effect of novel angiotensin converting enzyme (ACE) inhibitory peptides from *Spirulina* protein hydrolysate**

Qishan Suo<sup>a,b,c</sup>, Yang Yue<sup>a,b,\*</sup>, Jing Wang<sup>a,b</sup>, Ning Wu<sup>a,b</sup>, Lihua Geng<sup>a,b</sup>, Quanbin Zhang<sup>a,b,c,\*</sup>

<sup>a</sup> *CAS and Shandong Province Key Laboratory of Experimental Marine Biology, Center for Ocean Mega-Science, Institute of Oceanology, Chinese Academy of Sciences, Qingdao, China*

<sup>b</sup> *Laboratory for Marine Biology and Biotechnology, Qingdao National Laboratory for Marine Science and Technology, Qingdao, China*

<sup>c</sup> *University of Chinese Academy of Sciences, Beijing, China*

**Corresponding author** Tel: +86 0532-82898708

E-mail address: qbzhang@qdio.ac.cn;

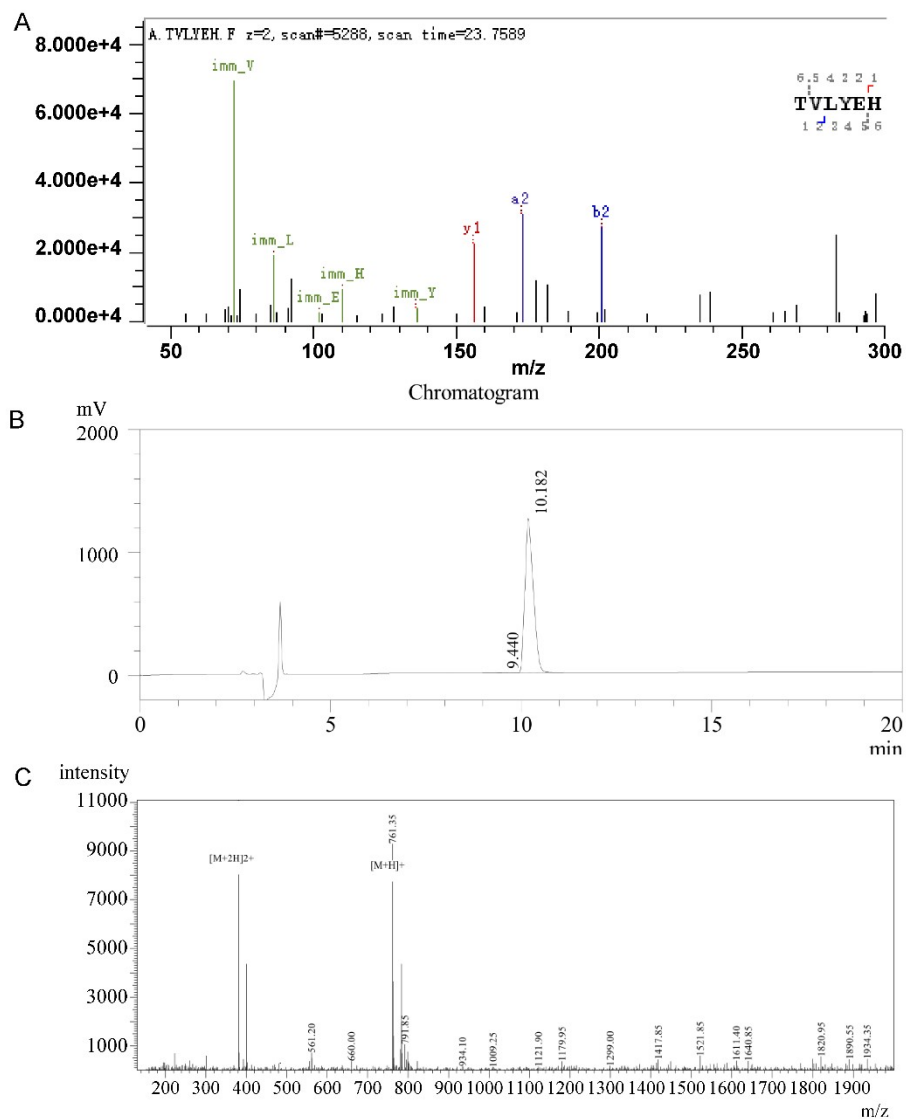

Fig. S1 Identification and synthesis of TVLYEH. (A) The LC-MS/MS mass spectrum of TVLYEH; (B) The HPLC chromatogram of synthesized TVLTEH; (C) The mass spectrum of the synthesized TVLYEH.

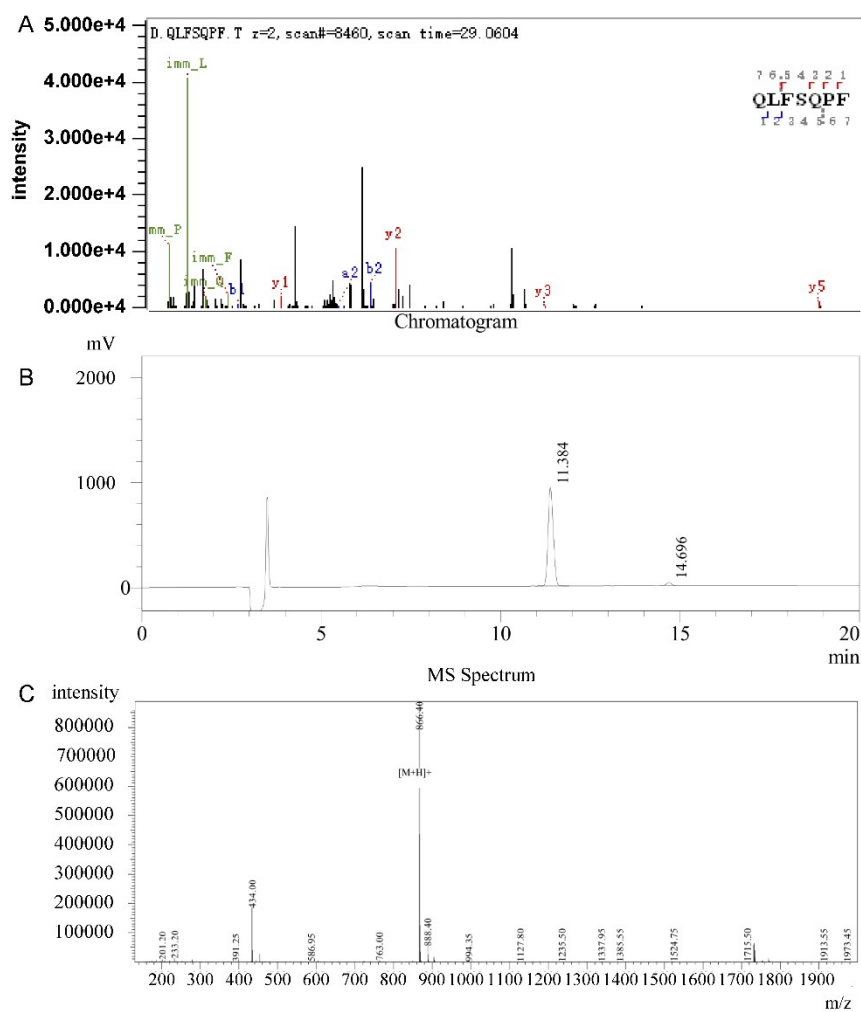

Fig. S2 Identification and synthesis of QLFSQPF. (A) The LC-MS/MS mass spectrum of QLFSQPF; (B) The HPLC chromatogram of synthesized QLFSQPF; (C) The mass spectrum of the synthesized QLFSQPF.

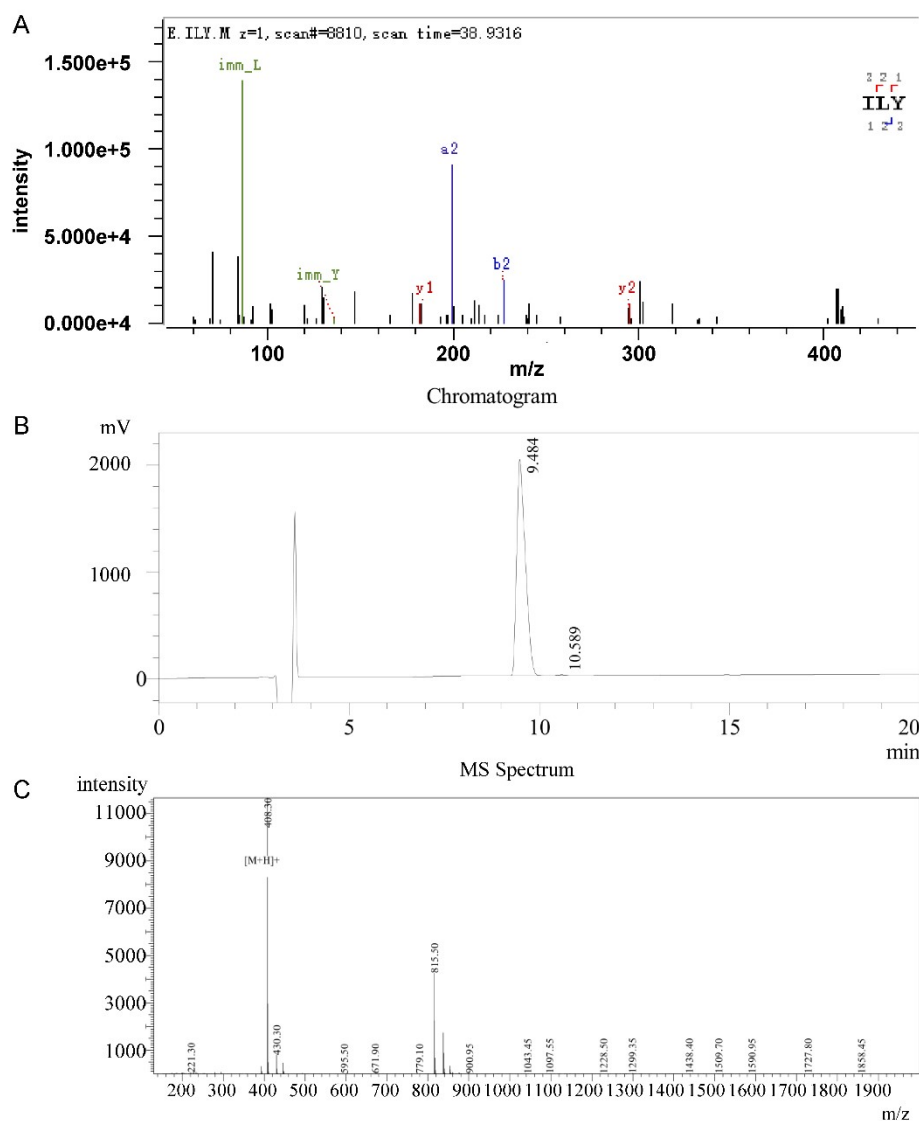

Fig. S3 Identification and synthesis of ILY. (A) The LC-MS/MS mass spectrum of ILY; (B) The HPLC chromatogram of synthesized ILY; (C) The mass spectrum of the synthesized ILY.

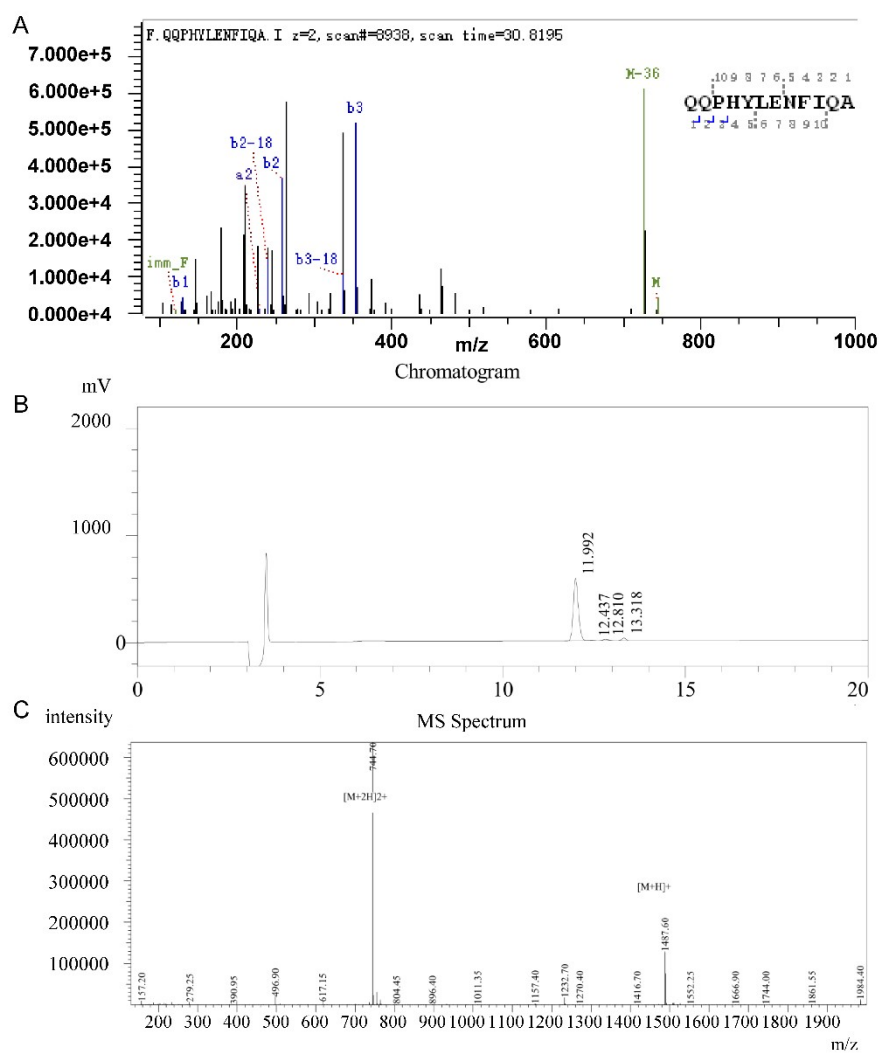

Fig. S4 Identification and synthesis of QQPHYLENFIQA. (A) The LC-MS/MS mass spectrum of QQPHYLENFIQA; (B) The HPLC chromatogram of synthesized QQPHYLENFIQA; (C) The mass spectrum of the synthesized QQPHYLENFIQA.

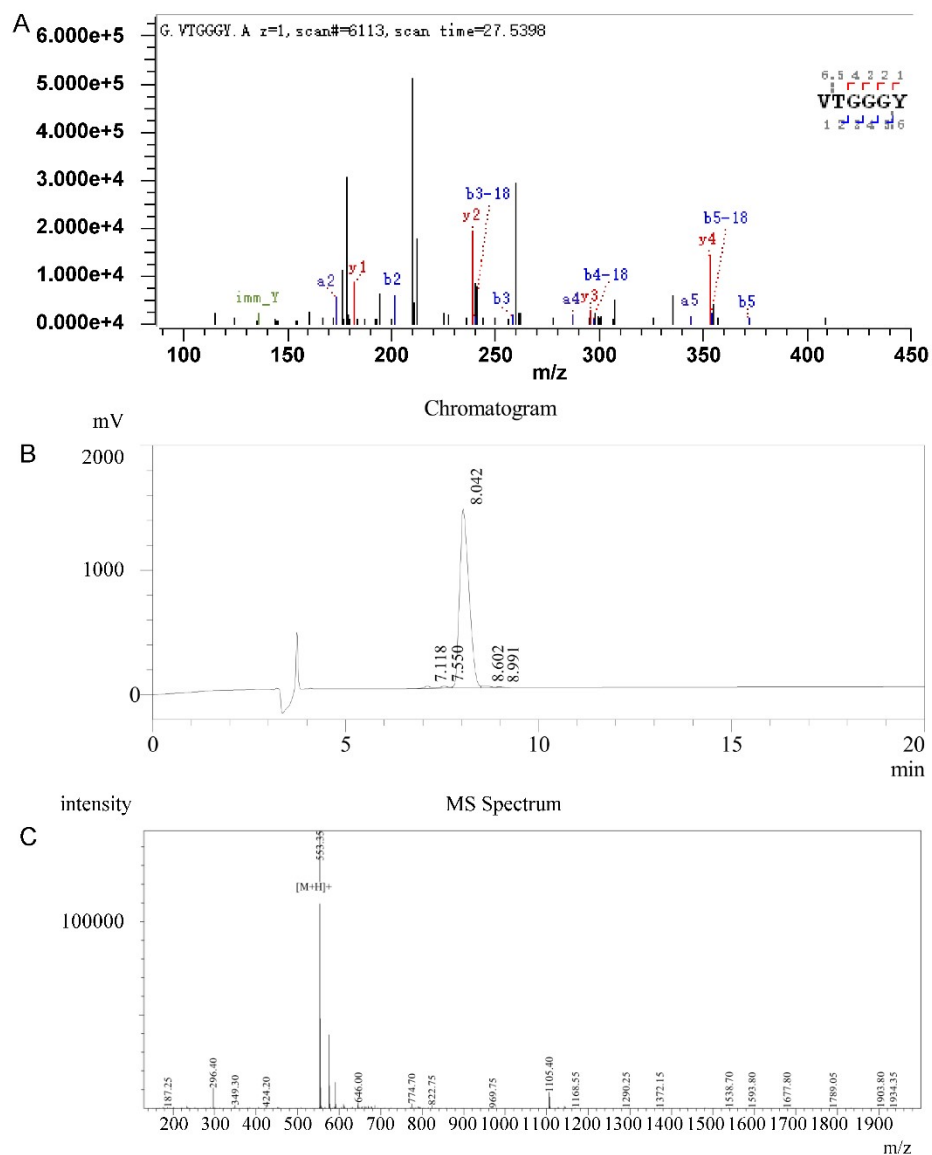

Fig. S5 Identification and synthesis of VTGGGY. (A) The LC-MS/MS mass spectrum of VTGGGY; (B) The HPLC chromatogram of synthesized VTGGGY; (C) The mass spectrum of the synthesized VTGGGY.

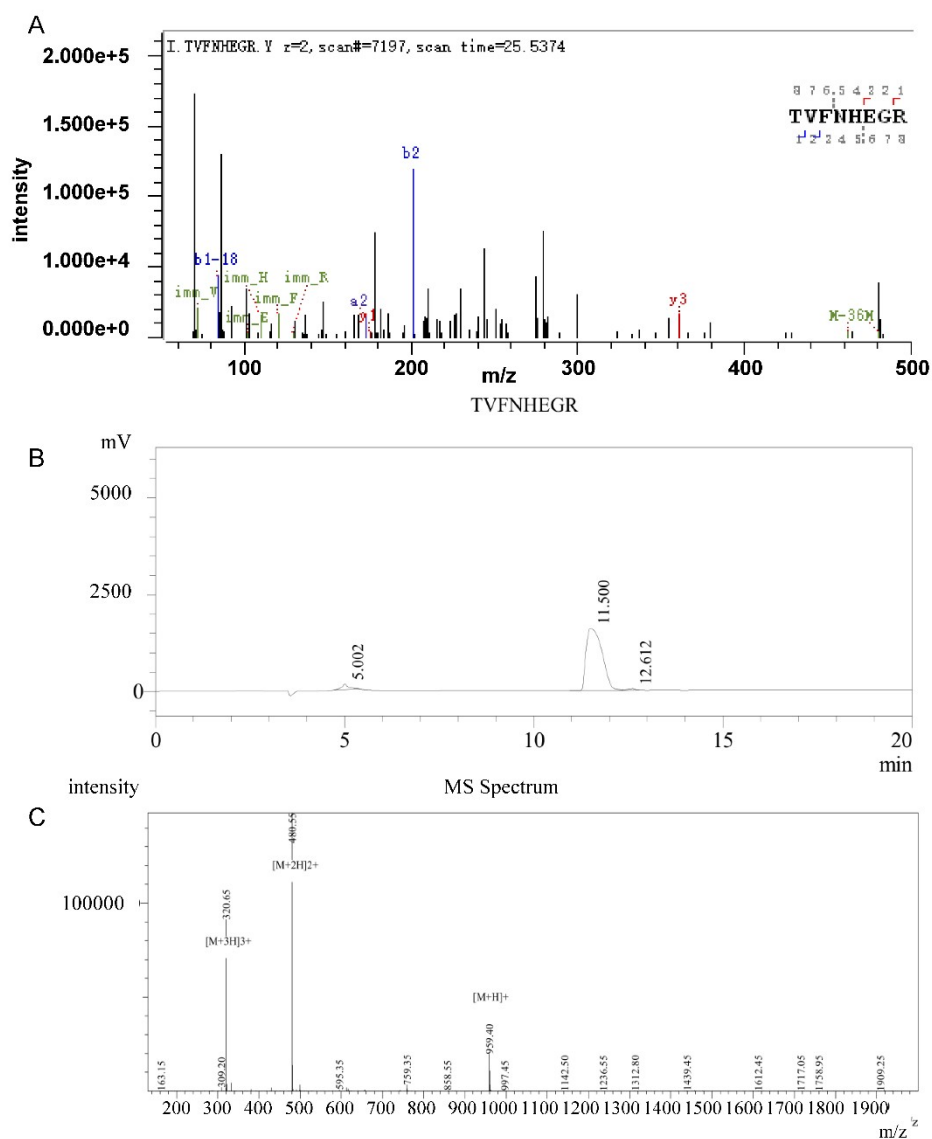

Fig. S6 Identification and synthesis of TVFNHEGR. (A) The LC-MS/MS mass spectrum of TVFNHEGR; (B) The HPLC chromatogram of synthesized TVFNHEGR; (C) The mass spectrum of the synthesized TVFNHEGR.

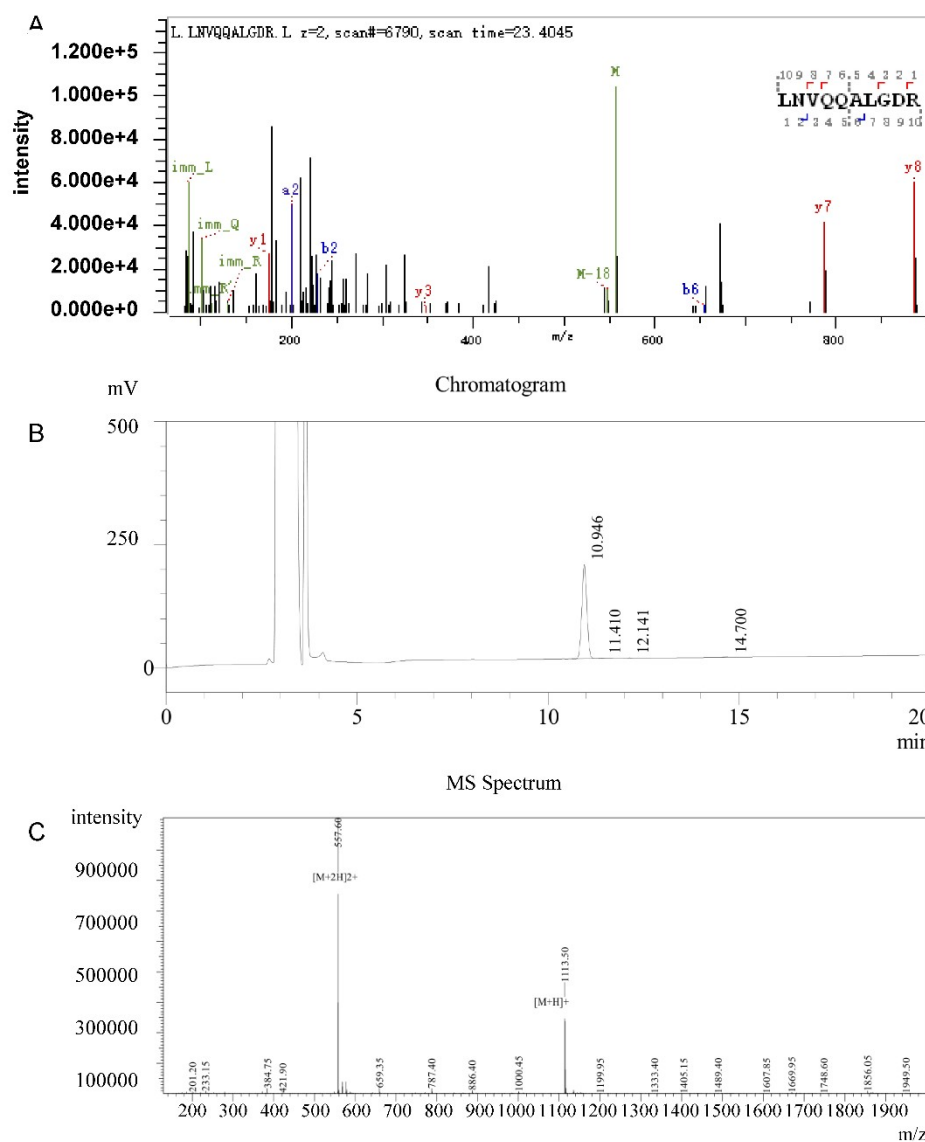

Fig. S7 Identification and synthesis of LNVQQALGDR. (A) The LC-MS/MS mass spectrum of LNVQQALGDR; (B) The HPLC chromatogram of synthesized LNVQQALGDR; (C) The mass spectrum of the synthesized LNVQQALGDR.



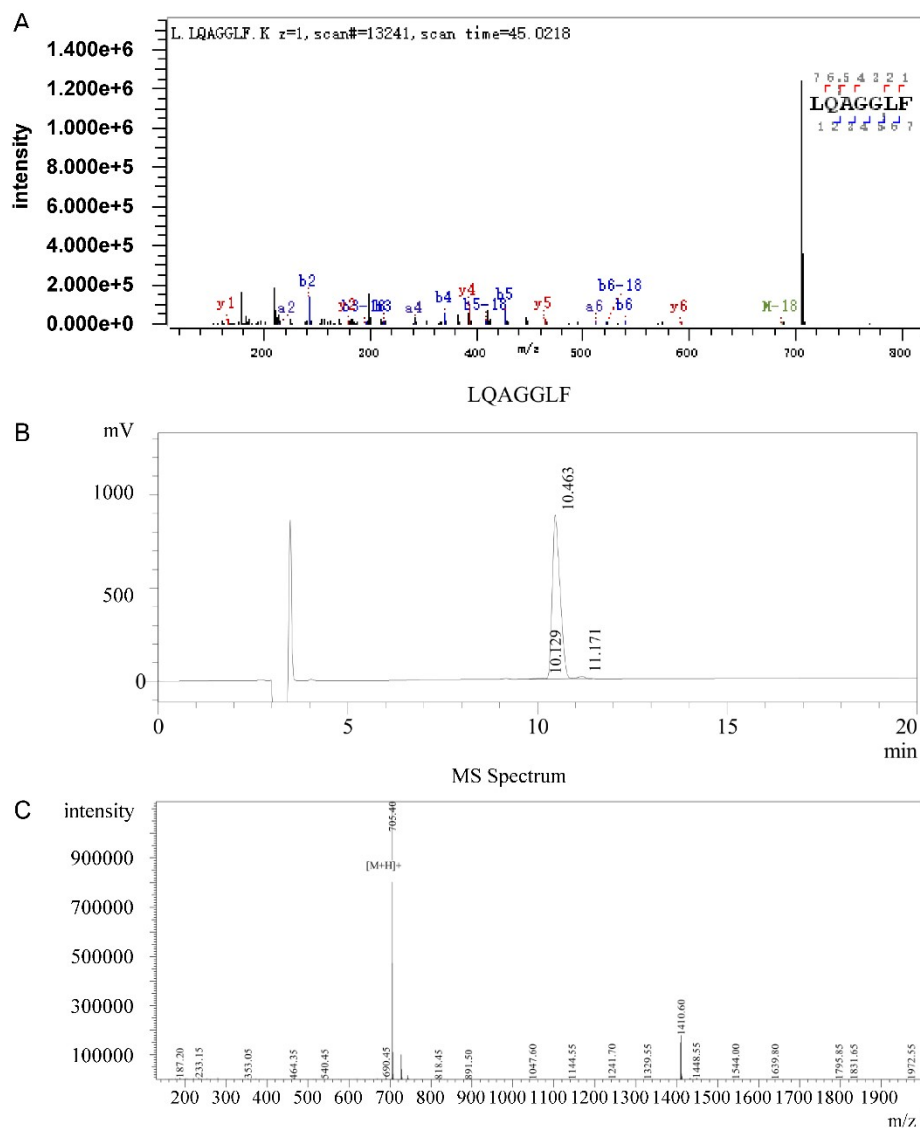

Fig. S8 Identification and synthesis of LQAGGLF. (A) The LC-MS/MS mass spectrum of LQAGGLF; (B) The HPLC chromatogram of synthesized LQAGGLF; (C) The mass spectrum of the synthesized LQAGGLF.

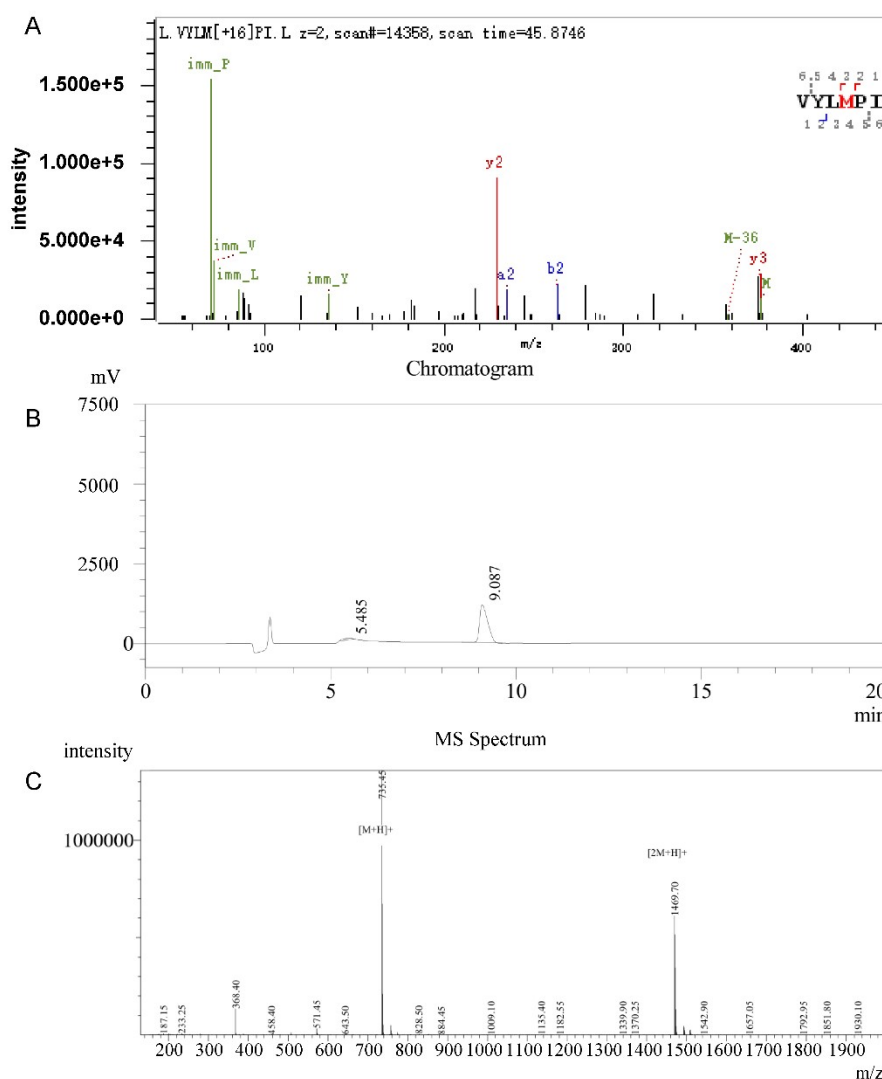

Fig. S9 Identification and synthesis of VYLMPI. (A) The LC-MS/MS mass spectrum of VYLMPI; (B) The HPLC chromatogram of synthesized VYLMPI; (C) The mass spectrum of the synthesized VYLMPI.

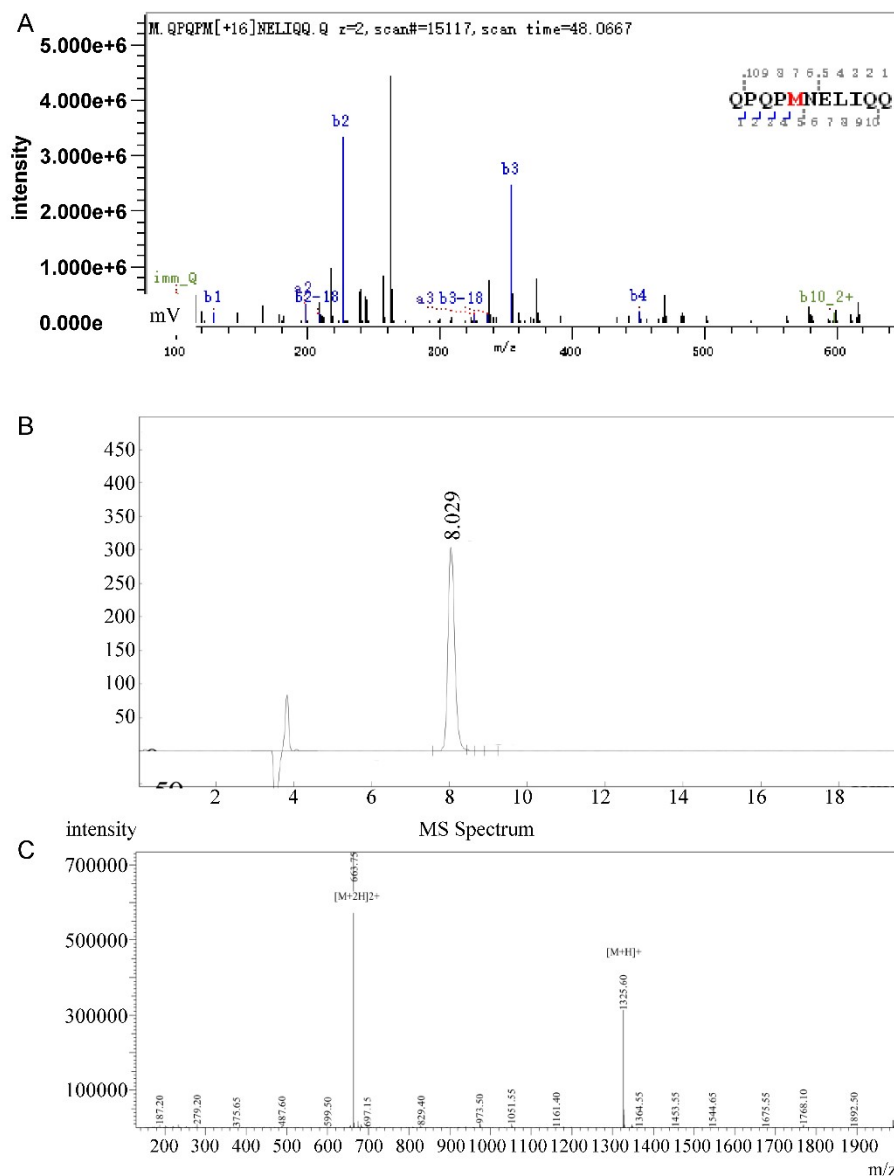

Fig. S10 Identification and synthesis of QPQPMNELIQQ. (A) The LC-MS/MS mass spectrum of QPQPMNELIQQ; (B) The HPLC chromatogram of synthesized QPQPMNELIQQ; (C) The mass spectrum of the synthesized QPQPMNELIQQ.

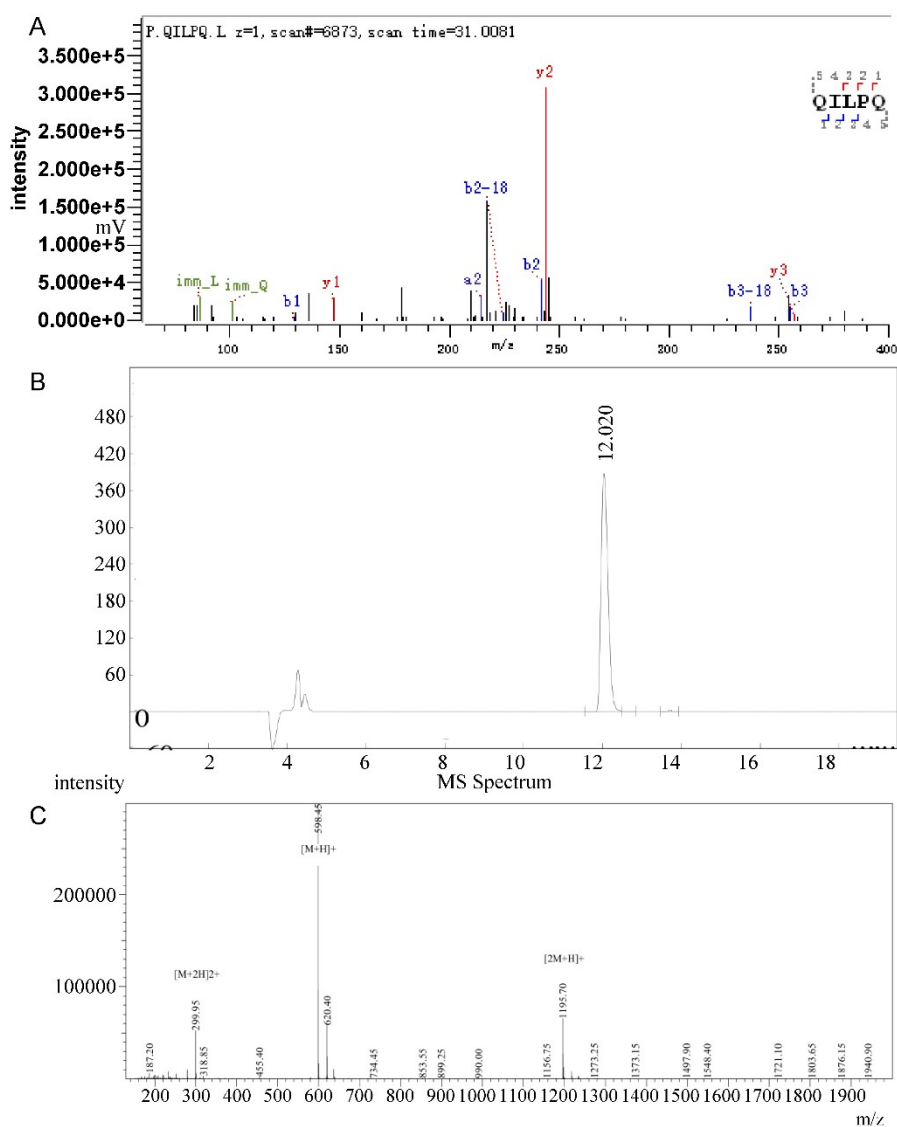

Fig. S11 Identification and synthesis of QILPQ. (A) The LC-MS/MS mass spectrum of QILPQ; (B) The HPLC chromatogram of synthesized QILPQ; (C) The mass spectrum of the synthesized QILPQ.

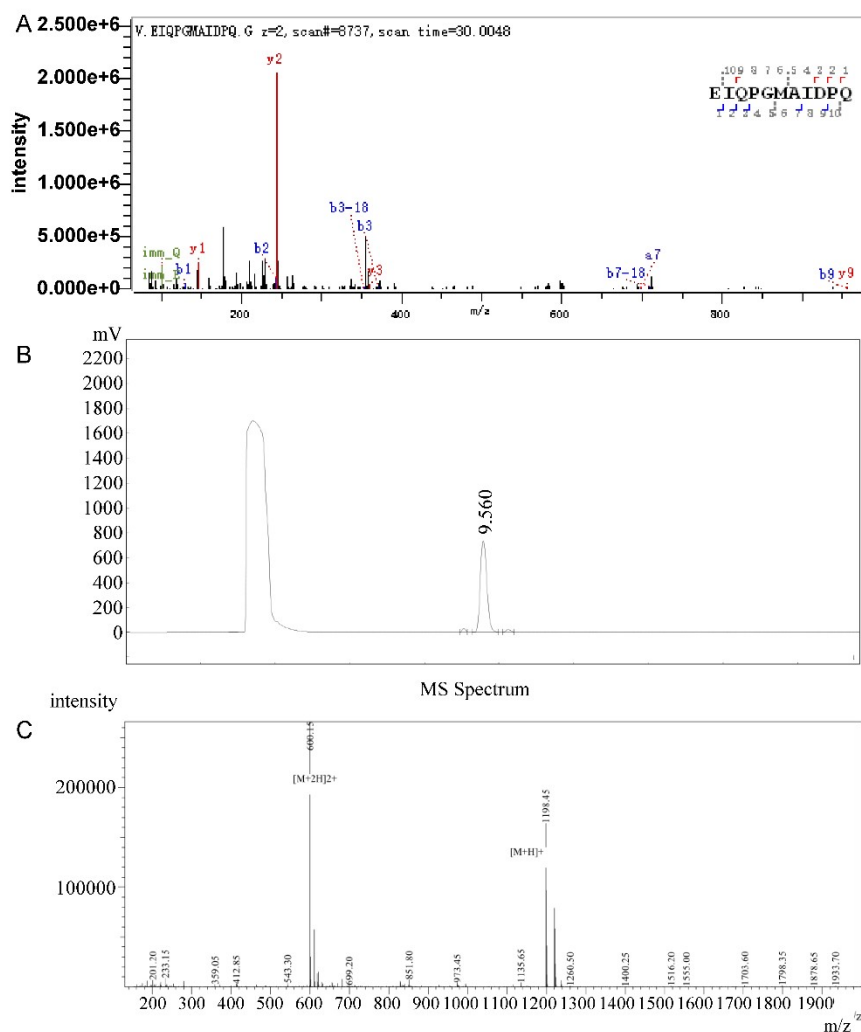

Fig. S12 Identification and synthesis of EIQPGMAIDPQ. (A) The LC-MS/MS mass spectrum of EIQPGMAIDPQ; (B) The HPLC chromatogram of synthesized EIQPGMAIDPQ; (C) The mass spectrum of the synthesized EIQPGMAIDPQ.

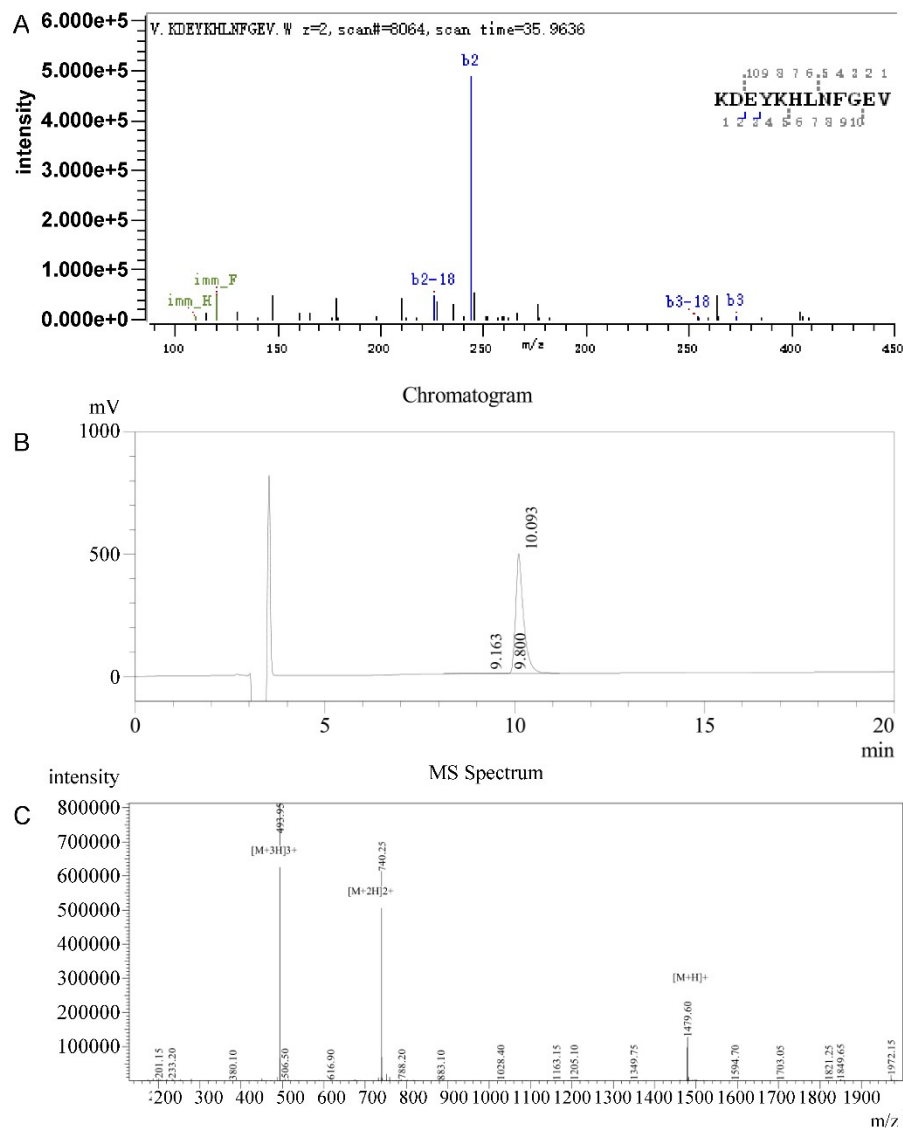

Fig. S13 Identification and synthesis of KDEYKHLNFGEV. (A) The LC-MS/MS mass spectrum of KDEYKHLNFGEV; (B) The HPLC chromatogram of synthesized KDEYKHLNFGEV; (C) The mass spectrum of the synthesized KDEYKHLNFGEV.

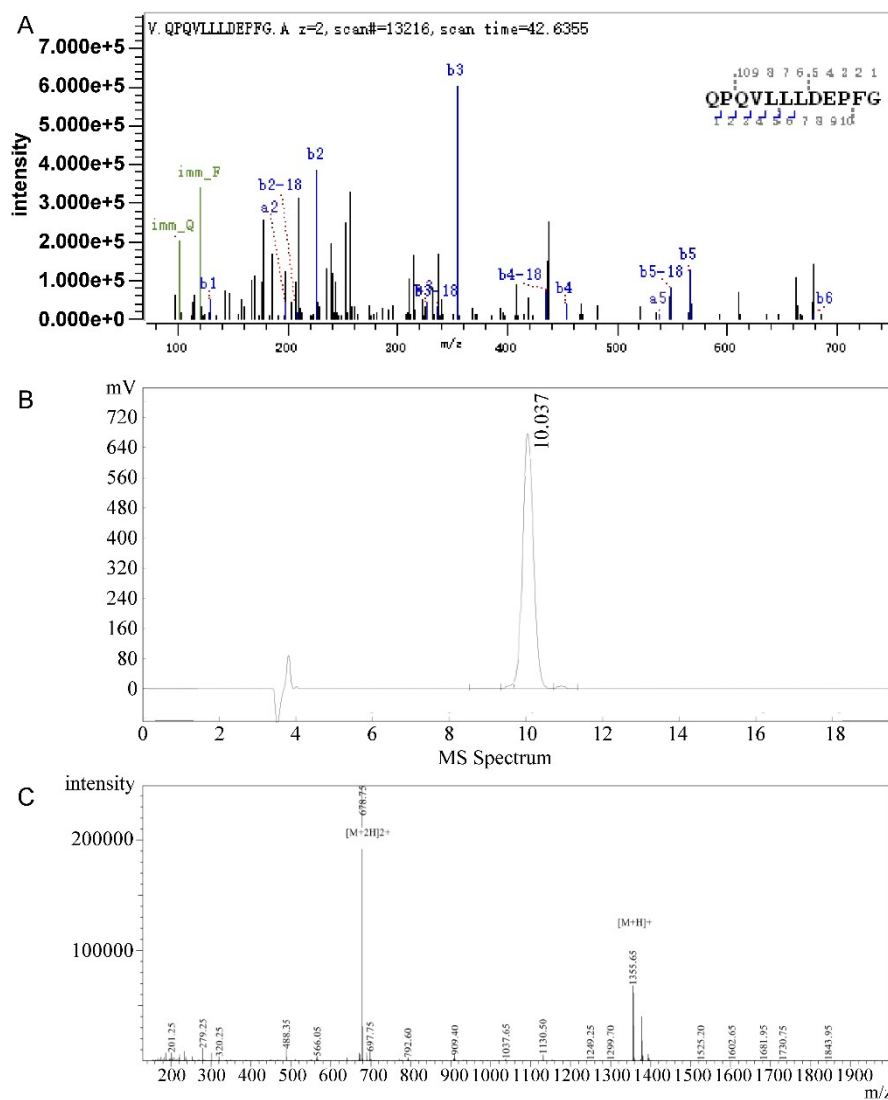

Fig. S14 Identification and synthesis of QPQVLLLDPEFG. (A) The LC-MS/MS mass spectrum of QPQVLLLDPEFG; (B) The HPLC chromatogram of synthesized QPQVLLLDPEFG; (C) The mass spectrum of the synthesized QPQVLLLDPEFG.

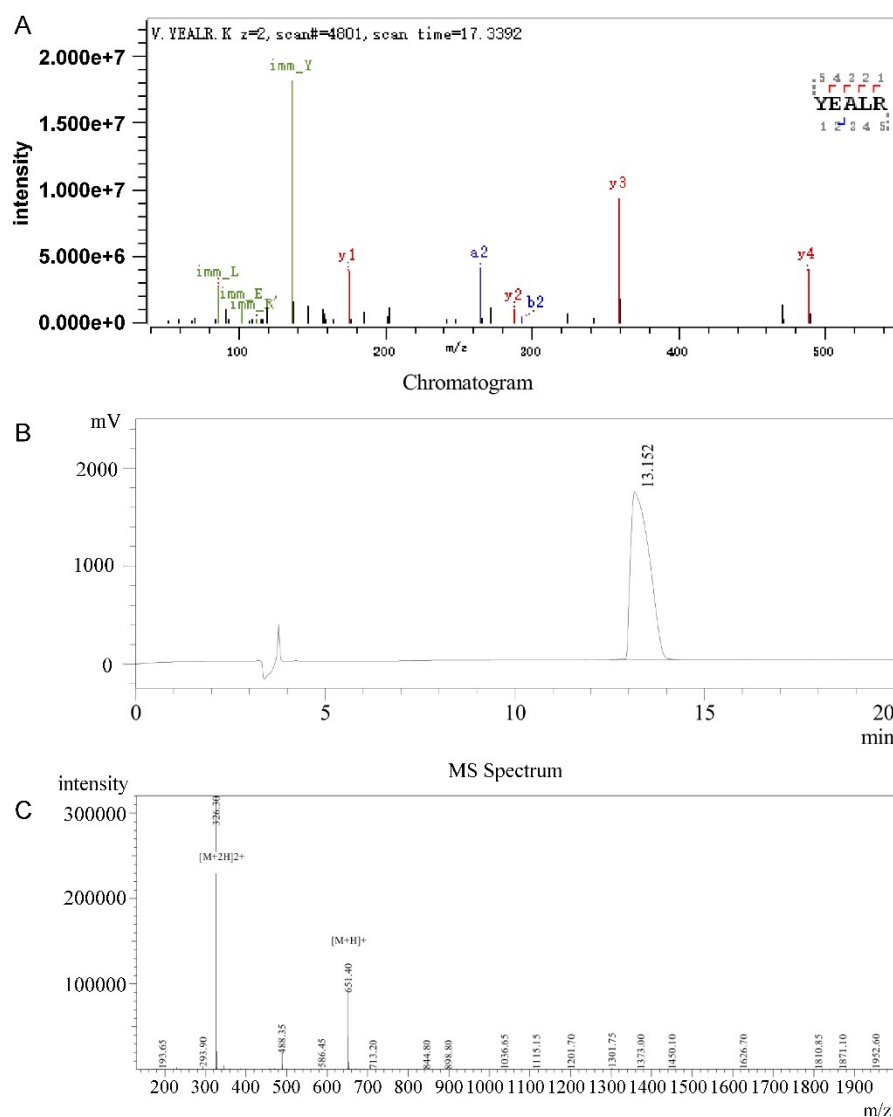

Fig. S15 Identification and synthesis of. YEALR. (A) The LC-MS/MS mass spectrum of YEALR; (B) The HPLC chromatogram of synthesized YEALR; (C) The mass spectrum of the synthesized YEALR.
