# Supplementary material for: Isolation, identification and in vivo antihypertensive effect of novel angiotensin I-converting enzyme (ACE) inhibitory peptides from Spirulina protein hydrolysate
Source: Royal Society of Chemistry journal article supplement (doi:10.1039/d2fo01207c), 2022-01-01
Supplement: d2fo01207c2.xlsx [file d2fo01207c2.xlsx]

## Sheet: Spectra
	Peptide < ProteinMetrics Confidential >	Modification Type(s)	Observed m/z	z	Observed (M+H)	Calc. mass (M+H)	Mass error (ppm)	Starting position	Score	Protein Name	Scan Time	intensity
1	L.VYLM[+15.995]PI.L	M[+16]	376.205	2	751.403	751.406	-3.3	18	104.57	>tr|A0A6P2AWD2|A0A6P2AWD2_9CYAN Uncharacterized protein OS=Spirulina sp. DLM2.Bin59 OX=2480215 GN=EA366_06745 PE=3 SV=1	45.8746	1492300000
2	D.RVVPVQP.I		397.748	2	794.489	794.488	1	239	145.83	>tr|A0A6P2AX69|A0A6P2AX69_9CYAN dTDP-4-dehydrorhamnose reductase OS=Spirulina sp. DLM2.Bin59 OX=2480215 GN=rfbD PE=3 SV=1	28.0361	1128700000
3	N.NLSRFYEKMKDY.P		797.388	2	1593.77	1593.77	-3.2	407	116.07	>tr|A0A6P2B145|A0A6P2B145_9CYAN CHAT domain-containing protein OS=Spirulina sp. DLM2.Bin59 OX=2480215 GN=EA366_03470 PE=4 SV=1	29.9858	729480000
4	V.QPQVLLLDEPFG.A		678.352	2	1355.7	1355.72	-17.4	150	218.63	>tr|A0A6P2AYN9|A0A6P2AYN9_9CYAN Sulfate/thiosulfate import ATP-binding protein CysA OS=Spirulina sp. DLM2.Bin59 OX=2480215 GN=cysA PE=3 SV=1	42.6355	624540000
5	V.QPQVLLLDEPFG.A		678.352	2	1355.7	1355.72	-17.4	150	183.98	>tr|A0A6P2AYN9|A0A6P2AYN9_9CYAN Sulfate/thiosulfate import ATP-binding protein CysA OS=Spirulina sp. DLM2.Bin59 OX=2480215 GN=cysA PE=3 SV=1	43.1432	624540000
6	F.FSGYRPQ.F		427.713	2	854.419	854.415	4.3	334	158.97	>tr|A0A6P2AY86|A0A6P2AY86_9CYAN Elongation factor Tu OS=Spirulina sp. DLM2.Bin59 OX=2480215 GN=tuf PE=3 SV=1	21.0183	624130000
7	E.TFGHHKAG.T		427.713	2	854.418	854.427	-10.3	292	152.86	>tr|A0A6P2AV51|A0A6P2AV51_9CYAN DUF3536 domain-containing protein OS=Spirulina sp. DLM2.Bin59 OX=2480215 GN=EA366_09155 PE=4 SV=1	20.5161	624130000
8	E.TFGHHKAG.T		427.712	2	854.418	854.427	-10.7	292	135.74	>tr|A0A6P2AV51|A0A6P2AV51_9CYAN DUF3536 domain-containing protein OS=Spirulina sp. DLM2.Bin59 OX=2480215 GN=EA366_09155 PE=4 SV=1	20.0074	624130000
9	V.EIQPGMAIDPQ.G		599.798	2	1198.59	1198.58	10	11	128.87	>tr|A0A6P2AWQ0|A0A6P2AWQ0_9CYAN Uncharacterized protein (Fragment) OS=Spirulina sp. DLM2.Bin59 OX=2480215 GN=EA366_06565 PE=4 SV=1	30.0048	592710000
10	H.QPQFPT.V		717.36	1	717.36	717.357	4.4	251	165.33	>tr|A0A6P2ASR3|A0A6P2ASR3_9CYAN DUF1868 domain-containing protein OS=Spirulina sp. DLM2.Bin59 OX=2480215 GN=EA366_09375 PE=4 SV=1	35.966	435650000
11	R.QPIGFQGDFFTS.A		672.318	2	1343.63	1343.63	1.1	34	115.24	>tr|A0A6P2ASM3|A0A6P2ASM3_9CYAN Class I SAM-dependent methyltransferase OS=Spirulina sp. DLM2.Bin59 OX=2480215 GN=EA366_09690 PE=4 SV=1	47.564	406800000
12	M.QPQPM[+15.995]NELIQQ.Q	M[+16]	671.333	2	1341.66	1341.65	9	410	123.25	>tr|A0A6P2AYR4|A0A6P2AYR4_9CYAN ABC transporter substrate-binding protein OS=Spirulina sp. DLM2.Bin59 OX=2480215 GN=EA366_04995 PE=4 SV=1	48.577	406800000
13	M.QPQPM[+15.995]NELIQQ.Q	M[+16]	671.335	2	1341.66	1341.65	11.7	410	165.12	>tr|A0A6P2AYR4|A0A6P2AYR4_9CYAN ABC transporter substrate-binding protein OS=Spirulina sp. DLM2.Bin59 OX=2480215 GN=EA366_04995 PE=4 SV=1	48.0667	406800000
14	K.IFQPH.F		321.174	2	641.341	641.341	0.1	260	186.14	>tr|A0A6P2AJ63|A0A6P2AJ63_9CYAN Long-chain fatty acid--CoA ligase OS=Spirulina sp. DLM2.Bin59 OX=2480215 GN=EA366_14405 PE=4 SV=1	21.5491	393940000
15	K.IFQPH.F		321.174	2	641.34	641.341	-1	260	214.72	>tr|A0A6P2AJ63|A0A6P2AJ63_9CYAN Long-chain fatty acid--CoA ligase OS=Spirulina sp. DLM2.Bin59 OX=2480215 GN=EA366_14405 PE=4 SV=1	21.0387	393940000
16	I.TVFNHEGR.Y		480.235	2	959.462	959.469	-7.7	955	113.28	>tr|A0A6P2AY18|A0A6P2AY18_9CYAN PAS domain S-box protein (Fragment) OS=Spirulina sp. DLM2.Bin59 OX=2480215 GN=EA366_04135 PE=3 SV=1	25.5374	377820000
17	R.ITC[+57.021]PLG.V	C[+57]	660.34	1	660.34	660.338	1.6	116	255.32	>tr|A0A6P2ARG1|A0A6P2ARG1_9CYAN Gamma-glutamyl phosphate reductase OS=Spirulina sp. DLM2.Bin59 OX=2480215 GN=proA PE=3 SV=1	31.615	320200000
18	S.AAGATPTDRQYTA.I		661.829	2	1322.65	1322.63	13	43	128.01	>tr|A0A6P2AUS8|A0A6P2AUS8_9CYAN UPF0284 protein EA366_07800 OS=Spirulina sp. DLM2.Bin59 OX=2480215 GN=EA366_07800 PE=3 SV=1	32.1288	320200000
19	V.MIAASFLALIVAIGC[+57.021].Y	C[+57]	775.434	2	1549.86	1549.85	8.8	496	115.43	>tr|A0A6P2AMN2|A0A6P2AMN2_9CYAN NAD(P)H-quinone oxidoreductase chain 4 OS=Spirulina sp. DLM2.Bin59 OX=2480215 GN=ndhD PE=3 SV=1	49.3383	317010000
20	D.SHIWGVLP.E		454.753	2	908.499	908.499	0.6	72	242.03	>tr|A0A6P2AZG5|A0A6P2AZG5_9CYAN Signal peptidase I (Fragment) OS=Spirulina sp. DLM2.Bin59 OX=2480215 GN=lepB PE=3 SV=1	25.6625	310770000
21	D.SHIWGVLP.E		454.753	2	908.498	908.499	-0.8	72	275.12	>tr|A0A6P2AZG5|A0A6P2AZG5_9CYAN Signal peptidase I (Fragment) OS=Spirulina sp. DLM2.Bin59 OX=2480215 GN=lepB PE=3 SV=1	25.1216	310770000
22	G.HSPD.S		455.204	1	455.204	455.188	34.1	945	120.82	>tr|A0A6P2AWA4|A0A6P2AWA4_9CYAN Serine/threonine-protein kinase PknK (Fragment) OS=Spirulina sp. DLM2.Bin59 OX=2480215 GN=EA366_04690 PE=4 SV=1	25.1216	310770000
23	T.QHPATATAW.I		491.742	2	982.477	982.474	3.5	91	162.65	>tr|A0A6P2AWY3|A0A6P2AWY3_9CYAN Ferrous iron transporter B (Fragment) OS=Spirulina sp. DLM2.Bin59 OX=2480215 GN=EA366_03925 PE=4 SV=1	20.713	300790000
24	G.VLVGQVQ.S		742.445	1	742.445	742.446	-0.5	395	156.35	>tr|A0A6P2AV27|A0A6P2AV27_9CYAN HlyD family efflux transporter periplasmic adaptor subunit OS=Spirulina sp. DLM2.Bin59 OX=2480215 GN=EA366_07390 PE=4 SV=1	36.7583	300510000
25	Q.QVSGVGS.D		633.322	1	633.322	633.32	2.2	275	227.07	>tr|A0A6P2AYU6|A0A6P2AYU6_9CYAN DUF1517 domain-containing protein OS=Spirulina sp. DLM2.Bin59 OX=2480215 GN=EA366_00600 PE=4 SV=1	16.7772	290230000
26	S.QSGIFP.H		648.337	1	648.337	648.335	2.3	375	112.41	>tr|A0A6P2AKC4|A0A6P2AKC4_9CYAN Uncharacterized protein OS=Spirulina sp. DLM2.Bin59 OX=2480215 GN=EA366_13985 PE=4 SV=1	45.434	282760000
27	N.QPQLQG.K		670.359	1	670.359	670.352	10.1	477	163.6	>tr|A0A6P2AUT9|A0A6P2AUT9_9CYAN Type 2 lantipeptide synthetase LanM OS=Spirulina sp. DLM2.Bin59 OX=2480215 GN=lanM PE=4 SV=1	38.077	282630000
28	G.QFQPI.A		632.342	1	632.342	632.34	2.6	65	151.59	>tr|A0A6P2AZN8|A0A6P2AZN8_9CYAN Glycosyltransferase OS=Spirulina sp. DLM2.Bin59 OX=2480215 GN=EA366_06060 PE=4 SV=1	47.9568	254690000
29	L.ETTRSQAADLAFAI.K		747.391	2	1493.77	1493.76	10	381	111.52	>tr|A0A6P2ASQ3|A0A6P2ASQ3_9CYAN GAF domain-containing protein OS=Spirulina sp. DLM2.Bin59 OX=2480215 GN=EA366_09455 PE=4 SV=1	44.4842	253340000
30	E.QPQIF.A		632.34	1	632.34	632.34	-0.1	94	155.9	>tr|A0A6P2AMM2|A0A6P2AMM2_9CYAN HAS-barrel domain-containing protein OS=Spirulina sp. DLM2.Bin59 OX=2480215 GN=EA366_13765 PE=4 SV=1	37.993	251870000
31	E.LHLLPL.H		705.465	1	705.465	705.466	-0.5	111	125.98	>tr|A0A6P2AY83|A0A6P2AY83_9CYAN CHAT domain-containing protein OS=Spirulina sp. DLM2.Bin59 OX=2480215 GN=EA366_06150 PE=4 SV=1	52.6055	248140000
32	D.YEAIR.D		326.176	2	651.345	651.346	-1.3	23	198.93	>tr|A0A6P2AXR2|A0A6P2AXR2_9CYAN Uma2 family endonuclease OS=Spirulina sp. DLM2.Bin59 OX=2480215 GN=EA366_00770 PE=4 SV=1	17.3222	216860000
33	Q.HLF.W		416.231	1	416.231	416.229	3	251	177.35	>tr|A0A6P2AMG7|A0A6P2AMG7_9CYAN Cytochrome c oxidase subunit 1 OS=Spirulina sp. DLM2.Bin59 OX=2480215 GN=ctaD PE=3 SV=1	26.5398	201600000
34	A.HLEAHPQ.C		416.205	2	831.402	831.411	-10.4	108	144.66	>tr|A0A6P2AVC9|A0A6P2AVC9_9CYAN Glycosyltransferase family 2 protein (Fragment) OS=Spirulina sp. DLM2.Bin59 OX=2480215 GN=EA366_09675 PE=4 SV=1	26.5398	201600000
35	V.QPQVLLLDEPFG.A		678.352	2	1355.7	1355.72	-17.9	150	186.2	>tr|A0A6P2AYN9|A0A6P2AYN9_9CYAN Sulfate/thiosulfate import ATP-binding protein CysA OS=Spirulina sp. DLM2.Bin59 OX=2480215 GN=cysA PE=3 SV=1	42.0445	196720000
36	N.AATFDRANLDVGY.H		706.852	2	1412.7	1412.68	11.6	510	111.28	>tr|A0A6P2AQV2|A0A6P2AQV2_9CYAN SLH domain-containing protein OS=Spirulina sp. DLM2.Bin59 OX=2480215 GN=EA366_11830 PE=3 SV=1	42.2287	179880000
37	R.PHQFPQ.S		377.188	2	753.368	753.368	0.6	62	159.25	>tr|A0A6P2AVF1|A0A6P2AVF1_9CYAN ATP-binding protein (Fragment) OS=Spirulina sp. DLM2.Bin59 OX=2480215 GN=EA366_06615 PE=4 SV=1	18.4638	177850000
38	R.PHQFPQ.S		377.188	2	753.369	753.368	0.8	62	244.98	>tr|A0A6P2AVF1|A0A6P2AVF1_9CYAN ATP-binding protein (Fragment) OS=Spirulina sp. DLM2.Bin59 OX=2480215 GN=EA366_06615 PE=4 SV=1	19.0459	177850000
39	I.LLF.P		392.255	1	392.255	392.254	1.9	861	165.86	>tr|A0A6P2AZJ7|A0A6P2AZJ7_9CYAN Phosphoenolpyruvate synthase OS=Spirulina sp. DLM2.Bin59 OX=2480215 GN=EA366_06245 PE=4 SV=1	53.004	171790000
40	Y.PQGAGSAPI.V		797.414	1	797.414	797.415	-1.2	418	163.96	>tr|A0A6P2AWZ8|A0A6P2AWZ8_9CYAN Histidine phosphatase family protein OS=Spirulina sp. DLM2.Bin59 OX=2480215 GN=EA366_02185 PE=4 SV=1	23.9736	168580000
41	A.QTPAAFVAPESAPQ.R		707.342	2	1413.68	1413.7	-16.5	12	104.83	>tr|A0A6P2AW38|A0A6P2AW38_9CYAN DUF3370 domain-containing protein OS=Spirulina sp. DLM2.Bin59 OX=2480215 GN=EA366_09020 PE=4 SV=1	29.8681	149780000
42	G.TTSVPF.L		651.335	1	651.335	651.335	-0.2	18	308.57	>tr|A0A6P2AXD8|A0A6P2AXD8_9CYAN Chromosome partition protein Smc OS=Spirulina sp. DLM2.Bin59 OX=2480215 GN=smc PE=3 SV=1	40.3742	145160000
43	D.QPFLT.G		605.331	1	605.331	605.329	2.3	173	106.35	>tr|A0A6P2AVC6|A0A6P2AVC6_9CYAN Protease 4 OS=Spirulina sp. DLM2.Bin59 OX=2480215 GN=sppA PE=3 SV=1	37.8579	143830000
44	A.AGKDPQPFDFS.I		604.79	2	1208.57	1208.56	12.3	444	138.05	>tr|A0A6P2AM10|A0A6P2AM10_9CYAN DUF4070 domain-containing protein OS=Spirulina sp. DLM2.Bin59 OX=2480215 GN=EA366_12775 PE=4 SV=1	37.8579	143830000
45	G.QGTAIF.P		636.338	1	636.338	636.335	5.1	20	156.29	>tr|A0A6P2AGJ8|A0A6P2AGJ8_9CYAN M24 family metallopeptidase OS=Spirulina sp. DLM2.Bin59 OX=2480215 GN=EA366_16195 PE=3 SV=1	31.2684	135290000
46	S.QASFSP.P		636.303	1	636.303	636.299	7.3	460	151.42	>tr|A0A6P2AL44|A0A6P2AL44_9CYAN Flavin oxidoreductase OS=Spirulina sp. DLM2.Bin59 OX=2480215 GN=EA366_14450 PE=3 SV=1	31.2684	135290000
47	R.LTPQPH.P		346.69	2	692.373	692.373	0.2	80	239.27	>tr|A0A6P2AM86|A0A6P2AM86_9CYAN YlxR family protein OS=Spirulina sp. DLM2.Bin59 OX=2480215 GN=EA366_15790 PE=4 SV=1	16.5347	131550000
48	R.LTPQPH.P		346.69	2	692.372	692.373	-0.8	80	173.93	>tr|A0A6P2AM86|A0A6P2AM86_9CYAN YlxR family protein OS=Spirulina sp. DLM2.Bin59 OX=2480215 GN=EA366_15790 PE=4 SV=1	16.0317	131550000
49	M.GALMPLAGH.A		433.732	2	866.456	866.455	0.8	13	105.06	>tr|A0A6P2B1Z9|A0A6P2B1Z9_9CYAN WD40 repeat domain-containing protein OS=Spirulina sp. DLM2.Bin59 OX=2480215 GN=EA366_01860 PE=4 SV=1	29.0253	129250000
50	E.QHPQMIL.L		433.732	2	866.457	866.455	1.9	63	146.27	>tr|A0A6P2AXG2|A0A6P2AXG2_9CYAN DNA-binding response regulator OS=Spirulina sp. DLM2.Bin59 OX=2480215 GN=EA366_02800 PE=4 SV=1	29.5336	129250000
51	R.SLL.T		332.218	1	332.218	332.218	-0.1	668	105.62	>tr|A0A6P2AZJ7|A0A6P2AZJ7_9CYAN Phosphoenolpyruvate synthase OS=Spirulina sp. DLM2.Bin59 OX=2480215 GN=EA366_06245 PE=4 SV=1	31.8935	126540000
52	L.PNFYPF.I		784.365	1	784.365	784.366	-1.2	342	140.11	>tr|A0A6P2AWE8|A0A6P2AWE8_9CYAN Cobaltochelatase subunit CobN (Fragment) OS=Spirulina sp. DLM2.Bin59 OX=2480215 GN=cobN PE=4 SV=1	62.9452	125760000
53	L.PNFYPF.I		784.365	1	784.365	784.366	-1.6	342	189.37	>tr|A0A6P2AWE8|A0A6P2AWE8_9CYAN Cobaltochelatase subunit CobN (Fragment) OS=Spirulina sp. DLM2.Bin59 OX=2480215 GN=cobN PE=4 SV=1	62.9297	125760000
54	T.APF.D		334.176	1	334.176	334.176	0.2	378	192.2	>tr|A0A6P2AMG7|A0A6P2AMG7_9CYAN Cytochrome c oxidase subunit 1 OS=Spirulina sp. DLM2.Bin59 OX=2480215 GN=ctaD PE=3 SV=1	27.675	124680000
55	V.AANQPLPL.Q		823.469	1	823.469	823.467	1.6	119	141.74	>tr|A0A6P2AWD8|A0A6P2AWD8_9CYAN Uncharacterized protein OS=Spirulina sp. DLM2.Bin59 OX=2480215 GN=EA366_07695 PE=4 SV=1	41.8938	123580000
56	D.THEPI.G		596.306	1	596.306	596.304	4.2	43	109.07	>tr|A0A6P2AX14|A0A6P2AX14_9CYAN Uncharacterized protein OS=Spirulina sp. DLM2.Bin59 OX=2480215 GN=EA366_04430 PE=4 SV=1	31.9101	123450000
57	M.KDQPLEQRFQH.L		713.359	2	1425.71	1425.72	-8.5	2	123.26	>tr|A0A6P2ANR8|A0A6P2ANR8_9CYAN DUF1788 domain-containing protein OS=Spirulina sp. DLM2.Bin59 OX=2480215 GN=EA366_12170 PE=4 SV=1	39.6078	122930000
58	L.VTQQPLGGKAQQGG.Q		684.866	2	1368.73	1368.72	1.8	979	149.08	>tr|A0A6P2ASU0|A0A6P2ASU0_9CYAN DNA-directed RNA polymerase subunit beta OS=Spirulina sp. DLM2.Bin59 OX=2480215 GN=rpoB PE=3 SV=1	21.0224	115380000
59	G.NAPASAYAY.C		927.433	1	927.433	927.421	13.1	938	106.29	>tr|A0A6P2AV92|A0A6P2AV92_9CYAN Non-specific serine/threonine protein kinase OS=Spirulina sp. DLM2.Bin59 OX=2480215 GN=EA366_09750 PE=4 SV=1	32.2062	111330000
60	S.QPFQAAY.D		824.395	1	824.395	824.394	1.7	4	122.8	>tr|A0A6P2AS24|A0A6P2AS24_9CYAN Dynamin family protein OS=Spirulina sp. DLM2.Bin59 OX=2480215 GN=EA366_11490 PE=4 SV=1	41.8745	109700000
61	A.RSQGQQTAVFDPQM.A		796.888	2	1592.77	1592.75	12.5	293	120.16	>tr|A0A6P2AZT7|A0A6P2AZT7_9CYAN Glycosyltransferase OS=Spirulina sp. DLM2.Bin59 OX=2480215 GN=EA366_01680 PE=4 SV=1	45.071	105040000
62	Y.QATRYSYGGLG.Y		586.784	2	1172.56	1172.57	-7.6	41	117.18	>tr|A0A6P2AYI3|A0A6P2AYI3_9CYAN FAD-binding oxidoreductase (Fragment) OS=Spirulina sp. DLM2.Bin59 OX=2480215 GN=EA366_07625 PE=4 SV=1	11.5915	99882000
63	E.QPQLTQSHIALG.H		646.854	2	1292.7	1292.7	3.1	295	103.27	>tr|A0A6P2AVY7|A0A6P2AVY7_9CYAN Insulinase family protein OS=Spirulina sp. DLM2.Bin59 OX=2480215 GN=EA366_05725 PE=4 SV=1	52.4174	98738000
64	V.PLMIGAKDMAFP.N		645.827	2	1290.65	1290.66	-8.3	105	109.7	>tr|A0A6P2AMG7|A0A6P2AMG7_9CYAN Cytochrome c oxidase subunit 1 OS=Spirulina sp. DLM2.Bin59 OX=2480215 GN=ctaD PE=3 SV=1	52.4174	98738000
65	N.QQPLLLI.Q		824.524	1	824.524	824.524	0.3	112	201.69	>tr|A0A6P2ASP6|A0A6P2ASP6_9CYAN Restriction endonuclease (Fragment) OS=Spirulina sp. DLM2.Bin59 OX=2480215 GN=EA366_10590 PE=4 SV=1	58.3177	97673000
66	K.ISIIPR.G		349.731	2	698.456	698.456	-0.4	443	108.86	>tr|A0A6P2B2T6|A0A6P2B2T6_9CYAN ATP-dependent zinc metalloprotease FtsH OS=Spirulina sp. DLM2.Bin59 OX=2480215 GN=ftsH PE=3 SV=1	33.2929	95884000
67	K.ISIIPR.G		349.731	2	698.456	698.456	-0.5	443	143.9	>tr|A0A6P2B2T6|A0A6P2B2T6_9CYAN ATP-dependent zinc metalloprotease FtsH OS=Spirulina sp. DLM2.Bin59 OX=2480215 GN=ftsH PE=3 SV=1	32.7876	95884000
68	L.AAFYRQ.I		755.384	1	755.384	755.384	0	103	119.07	>tr|A0A6P2AZI9|A0A6P2AZI9_9CYAN UDP-N-acetylglucosamine 2-epimerase (Non-hydrolyzing) OS=Spirulina sp. DLM2.Bin59 OX=2480215 GN=EA366_06295 PE=3 SV=1	34.7538	93697000
69	T.QQLTTYATEFK.V		665.342	2	1329.68	1329.67	5.7	687	131.58	>tr|A0A6P2AYL1|A0A6P2AYL1_9CYAN Histidine kinase domain-containing protein OS=Spirulina sp. DLM2.Bin59 OX=2480215 GN=EA366_00710 PE=4 SV=1	31.1521	93587000
70	T.FSF.A		400.187	1	400.187	400.187	1.2	338	122.2	>tr|A0A6P2AZJ7|A0A6P2AZJ7_9CYAN Phosphoenolpyruvate synthase OS=Spirulina sp. DLM2.Bin59 OX=2480215 GN=EA366_06245 PE=4 SV=1	50.6708	90690000
71	S.QPQGLR.E		698.384	1	698.384	698.394	-14.8	203	120.04	>tr|A0A6P2AM15|A0A6P2AM15_9CYAN Urease subunit alpha OS=Spirulina sp. DLM2.Bin59 OX=2480215 GN=ureC PE=3 SV=1	37.6079	90674000
72	P.QIPFPQ.I		729.39	1	729.39	729.393	-3.5	317	169.04	>tr|A0A6P2AUT9|A0A6P2AUT9_9CYAN Type 2 lantipeptide synthetase LanM OS=Spirulina sp. DLM2.Bin59 OX=2480215 GN=lanM PE=4 SV=1	33.0108	90449000
73	A.QSLIQY.Y		751.397	1	751.397	751.399	-1.4	226	328.14	>tr|A0A6P2AYY1|A0A6P2AYY1_9CYAN Protein kinase domain-containing protein (Fragment) OS=Spirulina sp. DLM2.Bin59 OX=2480215 GN=EA366_00450 PE=4 SV=1	40.4645	89735000
74	G.MITQQPL.R		830.442	1	830.442	830.444	-2.7	21	167.95	>tr|A0A6P2AL74|A0A6P2AL74_9CYAN Uncharacterized protein OS=Spirulina sp. DLM2.Bin59 OX=2480215 GN=EA366_13270 PE=4 SV=1	41.8013	88381000
75	S.YVL.R		394.234	1	394.234	394.234	0.6	78	102.48	>tr|A0A6P2AUU1|A0A6P2AUU1_9CYAN Glycosyltransferase (Fragment) OS=Spirulina sp. DLM2.Bin59 OX=2480215 GN=EA366_06290 PE=4 SV=1	36.4959	88212000
76	A.VYFLLM.I		393.214	2	785.421	785.427	-7.7	421	112.52	>tr|A0A6P2AYJ2|A0A6P2AYJ2_9CYAN NADH-quinone oxidoreductase subunit M OS=Spirulina sp. DLM2.Bin59 OX=2480215 GN=EA366_00850 PE=3 SV=1	36.4959	88212000
77	S.VYLFML.N		393.214	2	785.421	785.427	-7.7	14	112.52	>tr|A0A6P2AY47|A0A6P2AY47_9CYAN Uncharacterized protein OS=Spirulina sp. DLM2.Bin59 OX=2480215 GN=EA366_03465 PE=4 SV=1	36.4959	88212000
78	V.FGGL.S		393.201	1	393.201	393.213	-30.9	367	148.54	>tr|A0A6P2AMG7|A0A6P2AMG7_9CYAN Cytochrome c oxidase subunit 1 OS=Spirulina sp. DLM2.Bin59 OX=2480215 GN=ctaD PE=3 SV=1	36.4959	88212000
79	M.SREQAQEFLVNM.Y		726.357	2	1451.71	1451.69	7.8	26	114.16	>tr|A0A6P2ATJ0|A0A6P2ATJ0_9CYAN NblA-related protein OS=Spirulina sp. DLM2.Bin59 OX=2480215 GN=EA366_09220 PE=4 SV=1	37.3821	86266000
80	L.PSQQFVIGGGQS.V		602.806	2	1204.61	1204.6	8	468	124.27	>tr|A0A6P2AYH9|A0A6P2AYH9_9CYAN ShlB/FhaC/HecB family hemolysin secretion/activation protein OS=Spirulina sp. DLM2.Bin59 OX=2480215 GN=EA366_05580 PE=4 SV=1	44.9089	86133000
81	Y.QPHT.S		482.236	1	482.236	482.236	0.2	62	218.72	>tr|A0A6P2AL79|A0A6P2AL79_9CYAN Heat-inducible transcription repressor HrcA OS=Spirulina sp. DLM2.Bin59 OX=2480215 GN=hrcA PE=3 SV=1	30.6109	85437000
82	Q.AYFQTHAQ.P		483.229	2	965.45	965.448	2.8	313	128.42	>tr|A0A6P2ATX1|A0A6P2ATX1_9CYAN Bifunctional aldolase/short-chain dehydrogenase OS=Spirulina sp. DLM2.Bin59 OX=2480215 GN=EA366_09755 PE=4 SV=1	30.6109	85437000
83	G.SGVQGQIAG.A		816.425	1	816.425	816.421	5	500	190.96	>tr|A0A6P2AVA4|A0A6P2AVA4_9CYAN Copper-translocating P-type ATPase OS=Spirulina sp. DLM2.Bin59 OX=2480215 GN=EA366_09030 PE=3 SV=1	40.4323	79587000
84	D.QPQIFQ.R		760.399	1	760.399	760.399	-0.4	57	180.09	>tr|A0A6P2AP43|A0A6P2AP43_9CYAN ATP-binding protein (Fragment) OS=Spirulina sp. DLM2.Bin59 OX=2480215 GN=EA366_14440 PE=4 SV=1	38.0206	77962000
85	A.LQPWGFPDSVK.P		637.332	2	1273.66	1273.66	-1.3	241	179	>tr|A0A6P2B1B4|A0A6P2B1B4_9CYAN Primosomal protein N' (Replication factor Y)-superfamily II helicase OS=Spirulina sp. DLM2.Bin59 OX=2480215 GN=EA366_03095 PE=4 SV=1	40.1525	77019000
86	T.ESRPQ.E		616.309	1	616.309	616.305	7.5	41	169.74	>tr|A0A6P2AHC7|A0A6P2AHC7_9CYAN S9 family peptidase OS=Spirulina sp. DLM2.Bin59 OX=2480215 GN=EA366_15730 PE=3 SV=1	24.255	76518000
87	L.TAAEVATF.L		809.404	1	809.404	809.404	0.3	50	114.29	>tr|A0A6P2ATL3|A0A6P2ATL3_9CYAN Filamentous hemagglutinin N-terminal domain-containing protein (Fragment) OS=Spirulina sp. DLM2.Bin59 OX=2480215 GN=EA366_08710 PE=4 SV=1	38.5653	74773000
88	S.VAAIKNQV.I		421.758	2	842.51	842.509	0.1	69	205.32	>tr|A0A6P2AY57|A0A6P2AY57_9CYAN Cytochrome c6 OS=Spirulina sp. DLM2.Bin59 OX=2480215 GN=petJ PE=3 SV=1	30.4841	74103000
89	Q.TAAPQFPN.R		423.212	2	845.417	845.415	2.5	140	111.56	>tr|A0A6P2AQX5|A0A6P2AQX5_9CYAN DUF3685 domain-containing protein OS=Spirulina sp. DLM2.Bin59 OX=2480215 GN=EA366_11010 PE=4 SV=1	27.2171	73907000
90	A.QQLAAEDL.D		444.225	2	887.442	887.447	-5.6	198	105.34	>tr|A0A6P2AVP4|A0A6P2AVP4_9CYAN Peptidase M15A OS=Spirulina sp. DLM2.Bin59 OX=2480215 GN=EA366_10360 PE=4 SV=1	14.7217	71240000
91	S.VTVPHI.L		665.4	1	665.4	665.398	3.5	125	182.74	>tr|A0A6P2AQG9|A0A6P2AQG9_9CYAN DUF561 domain-containing protein OS=Spirulina sp. DLM2.Bin59 OX=2480215 GN=EA366_11970 PE=4 SV=1	29.55	70680000
92	V.TVVIPTLNEADR.I		664.372	2	1327.74	1327.72	11.5	54	220.18	>tr|A0A6P2AUU1|A0A6P2AUU1_9CYAN Glycosyltransferase (Fragment) OS=Spirulina sp. DLM2.Bin59 OX=2480215 GN=EA366_06290 PE=4 SV=1	29.55	70680000
93	W.TM[+15.995]WKLPLFSA.S	M[+16]	605.332	2	1209.66	1209.63	18.8	54	101.22	>tr|A0A6P2AUZ9|A0A6P2AUZ9_9CYAN Ribulose bisphosphate carboxylase small subunit OS=Spirulina sp. DLM2.Bin59 OX=2480215 GN=EA366_09295 PE=4 SV=1	53.7356	70597000
94	G.GTTSVPF.L		708.355	1	708.355	708.356	-1.2	17	233.19	>tr|A0A6P2AXD8|A0A6P2AXD8_9CYAN Chromosome partition protein Smc OS=Spirulina sp. DLM2.Bin59 OX=2480215 GN=smc PE=3 SV=1	40.4061	70407000
95	I.SPEGDGY.G		362.645	2	724.283	724.278	5.9	27	154.45	>tr|A0A6P2AR65|A0A6P2AR65_9CYAN Uncharacterized protein OS=Spirulina sp. DLM2.Bin59 OX=2480215 GN=EA366_13200 PE=4 SV=1	37.7813	70113000
96	S.GQSFFLYPVETQFS.E		825.401	2	1649.79	1649.78	5.9	38	146.53	>tr|A0A6P2ANP1|A0A6P2ANP1_9CYAN DUF1802 family protein (Fragment) OS=Spirulina sp. DLM2.Bin59 OX=2480215 GN=EA366_11815 PE=4 SV=1	16.7131	68190000
97	A.QVWVAPGQWS.F		579.293	2	1157.58	1157.57	4.2	119	156.03	>tr|A0A6P2AZ46|A0A6P2AZ46_9CYAN DUF4336 domain-containing protein OS=Spirulina sp. DLM2.Bin59 OX=2480215 GN=EA366_02940 PE=4 SV=1	50.1198	68083000
98	W.LM[+15.995]LPR.P	M[+16]	323.191	2	645.375	645.375	-0.4	402	205.12	>tr|A0A6P2AUK6|A0A6P2AUK6_9CYAN Uncharacterized protein (Fragment) OS=Spirulina sp. DLM2.Bin59 OX=2480215 GN=EA366_06580 PE=4 SV=1	23.3565	67675000
99	L.AAVLPFVYPHGAV.T		670.872	2	1340.74	1340.74	0.8	151	155.52	>tr|A0A6P2AWQ0|A0A6P2AWQ0_9CYAN Uncharacterized protein (Fragment) OS=Spirulina sp. DLM2.Bin59 OX=2480215 GN=EA366_06565 PE=4 SV=1	42.7962	67486000
100	W.LM[+15.995]LPR.P	M[+16]	323.192	2	645.376	645.375	0.6	402	190.03	>tr|A0A6P2AUK6|A0A6P2AUK6_9CYAN Uncharacterized protein (Fragment) OS=Spirulina sp. DLM2.Bin59 OX=2480215 GN=EA366_06580 PE=4 SV=1	22.8511	66557000
101	Q.QVIPQ.G		584.342	1	584.342	584.34	3.2	233	225.74	>tr|A0A6P2AY91|A0A6P2AY91_9CYAN TIGR01777 family protein (Fragment) OS=Spirulina sp. DLM2.Bin59 OX=2480215 GN=EA366_01435 PE=3 SV=1	24.6001	65682000
102	H.QQLPFQ.V		760.398	1	760.398	760.399	-1.1	108	132.51	>tr|A0A6P2AW75|A0A6P2AW75_9CYAN Aspartate--tRNA(Asp/Asn) ligase OS=Spirulina sp. DLM2.Bin59 OX=2480215 GN=aspS PE=3 SV=1	39.0349	64107000
103	F.TFP.S		364.187	1	364.187	364.187	2	44	117.63	>tr|A0A6P2ANI6|A0A6P2ANI6_9CYAN BON domain-containing protein OS=Spirulina sp. DLM2.Bin59 OX=2480215 GN=EA366_12105 PE=4 SV=1	28.8997	63755000
104	N.QFNALPVENLM.G		638.323	2	1275.64	1275.64	-0.6	278	176.63	>tr|A0A6P2AUX9|A0A6P2AUX9_9CYAN Glycosyltransferase family 9 protein OS=Spirulina sp. DLM2.Bin59 OX=2480215 GN=EA366_08575 PE=4 SV=1	55.1328	63658000
105	I.DDIQHPPPLPF.L		638.322	2	1275.64	1275.64	0.7	402	116.83	>tr|A0A6P2AYA9|A0A6P2AYA9_9CYAN GAF domain-containing protein OS=Spirulina sp. DLM2.Bin59 OX=2480215 GN=EA366_05925 PE=4 SV=1	55.6529	63658000
106	I.DDIQHPPPLPF.L		638.323	2	1275.64	1275.64	2.4	402	135.49	>tr|A0A6P2AYA9|A0A6P2AYA9_9CYAN GAF domain-containing protein OS=Spirulina sp. DLM2.Bin59 OX=2480215 GN=EA366_05925 PE=4 SV=1	54.6259	63658000
107	G.MEVNELPLSMI.L		638.324	2	1275.64	1275.63	6	468	108.2	>tr|A0A6P2AYH0|A0A6P2AYH0_9CYAN Hydroxylamine reductase OS=Spirulina sp. DLM2.Bin59 OX=2480215 GN=hcp PE=3 SV=1	54.1216	63658000
108	T.YQTGNAEPTVPF.W		662.304	2	1323.6	1323.62	-15.3	313	103.41	>tr|A0A6P2AT26|A0A6P2AT26_9CYAN FAD-dependent oxidoreductase OS=Spirulina sp. DLM2.Bin59 OX=2480215 GN=EA366_09265 PE=4 SV=1	28.7097	63349000
109	K.AATPVEAPQ.A		883.444	1	883.444	883.452	-8.8	19	102.5	>tr|A0A6P2AVZ2|A0A6P2AVZ2_9CYAN Elongation factor Ts OS=Spirulina sp. DLM2.Bin59 OX=2480215 GN=tsf PE=3 SV=1	32.1825	60491000
110	E.LFKVFY.S		408.74	2	816.473	816.465	8.9	216	126.38	>tr|A0A6P2ATI6|A0A6P2ATI6_9CYAN Uncharacterized protein OS=Spirulina sp. DLM2.Bin59 OX=2480215 GN=EA366_11840 PE=4 SV=1	28.1984	60437000
111	E.QQLPFLGLC[+57.021]L.G	C[+57]	594.82	2	1188.63	1188.64	-9.9	373	126.81	>tr|A0A6P2AY93|A0A6P2AY93_9CYAN CTP synthase OS=Spirulina sp. DLM2.Bin59 OX=2480215 GN=pyrG PE=3 SV=1	25.7141	59383000
112	H.TAAAGQIIFDQG.G		596.313	2	1191.62	1191.6	14.6	15	153.89	>tr|A0A6P2AVP7|A0A6P2AVP7_9CYAN Gamma-glutamyltransferase OS=Spirulina sp. DLM2.Bin59 OX=2480215 GN=ggt PE=4 SV=1	25.7141	59383000
113	H.TAAAGQIIFDQG.G		596.313	2	1191.62	1191.6	14.8	15	143.72	>tr|A0A6P2AVP7|A0A6P2AVP7_9CYAN Gamma-glutamyltransferase OS=Spirulina sp. DLM2.Bin59 OX=2480215 GN=ggt PE=4 SV=1	25.1834	59383000
114	T.QPQPPQELAAL.S		596.312	2	1191.62	1191.64	-16.2	901	159.8	>tr|A0A6P2AWA4|A0A6P2AWA4_9CYAN Serine/threonine-protein kinase PknK (Fragment) OS=Spirulina sp. DLM2.Bin59 OX=2480215 GN=EA366_04690 PE=4 SV=1	25.6106	59383000
115	M.SQTTVPF.W		779.393	1	779.393	779.393	-0.2	179	290.48	>tr|A0A6P2AVU8|A0A6P2AVU8_9CYAN Carotenoid biosynthesis protein OS=Spirulina sp. DLM2.Bin59 OX=2480215 GN=EA366_05550 PE=4 SV=1	40.2302	58928000
116	S.LSHPGI.P		312.179	2	623.351	623.351	-0.1	91	226.83	>tr|A0A6P2AUT6|A0A6P2AUT6_9CYAN Non-specific serine/threonine protein kinase (Fragment) OS=Spirulina sp. DLM2.Bin59 OX=2480215 GN=EA366_09360 PE=4 SV=1	33.2793	58010000
117	L.YLPYP.R		652.336	1	652.336	652.334	2.9	118	144.15	>tr|A0A6P2AW40|A0A6P2AW40_9CYAN Pilus assembly protein PilM OS=Spirulina sp. DLM2.Bin59 OX=2480215 GN=EA366_10020 PE=4 SV=1	37.6627	57710000
118	E.QQLPF.L		632.342	1	632.342	632.34	2.8	373	210.43	>tr|A0A6P2AY93|A0A6P2AY93_9CYAN CTP synthase OS=Spirulina sp. DLM2.Bin59 OX=2480215 GN=pyrG PE=3 SV=1	43.8319	57062000
119	I.QQVFI.G		634.358	1	634.358	634.356	2.8	150	204.79	>tr|A0A6P2B1K3|A0A6P2B1K3_9CYAN Glutamate synthase large subunit OS=Spirulina sp. DLM2.Bin59 OX=2480215 GN=EA366_02595 PE=3 SV=1	43.8319	57062000
120	I.VSGGQALPQGQGA.I		585.304	2	1169.6	1169.59	8.5	336	107.38	>tr|A0A6P2AWF9|A0A6P2AWF9_9CYAN ABC transporter ATP-binding protein OS=Spirulina sp. DLM2.Bin59 OX=2480215 GN=EA366_04770 PE=4 SV=1	36.0289	56074000
121	D.TNPITMTNYS.V		571.264	2	1141.52	1141.52	2.1	428	130.19	>tr|A0A6P2AXM7|A0A6P2AXM7_9CYAN Alpha-mannosidase (Fragment) OS=Spirulina sp. DLM2.Bin59 OX=2480215 GN=EA366_01625 PE=3 SV=1	18.5668	55831000
122	W.SQGAPAGRNPW.R		570.788	2	1140.57	1140.55	12.6	494	117.41	>tr|A0A6P2AMG7|A0A6P2AMG7_9CYAN Cytochrome c oxidase subunit 1 OS=Spirulina sp. DLM2.Bin59 OX=2480215 GN=ctaD PE=3 SV=1	18.5668	55831000
123	I.FYWVSRPQ.P		541.77	2	1082.53	1082.54	-9	555	144.81	>tr|A0A6P2AXC6|A0A6P2AXC6_9CYAN Phosphate ABC transporter permease PstA OS=Spirulina sp. DLM2.Bin59 OX=2480215 GN=pstA PE=3 SV=1	23.8266	55321000
124	I.FYWVSRPQ.P		541.769	2	1082.53	1082.54	-10.9	555	128.14	>tr|A0A6P2AXC6|A0A6P2AXC6_9CYAN Phosphate ABC transporter permease PstA OS=Spirulina sp. DLM2.Bin59 OX=2480215 GN=pstA PE=3 SV=1	24.3297	55321000
125	S.SM[+15.995]PILR.E	M[+16]	366.708	2	732.409	732.407	2.3	207	114.28	>tr|A0A6P2AI35|A0A6P2AI35_9CYAN AAA_31 domain-containing protein OS=Spirulina sp. DLM2.Bin59 OX=2480215 GN=EA366_16225 PE=4 SV=1	23.4201	55102000
126	Y.QPQQLI.R		726.428	1	726.428	726.414	19.4	127	116.55	>tr|A0A6P2AXK4|A0A6P2AXK4_9CYAN Non-specific serine/threonine protein kinase OS=Spirulina sp. DLM2.Bin59 OX=2480215 GN=EA366_02850 PE=4 SV=1	55.3648	54085000
127	D.PAGQLAWTAAVAADER.K		813.915	2	1626.82	1626.82	-0.7	21	131.27	>tr|A0A6P2AS43|A0A6P2AS43_9CYAN Ribosomal silencing factor RsfS OS=Spirulina sp. DLM2.Bin59 OX=2480215 GN=rsfS PE=3 SV=1	40.8045	53455000
128	V.GAPEQGQQ.V		814.373	1	814.373	814.369	4.5	508	130.67	>tr|A0A6P2ASQ2|A0A6P2ASQ2_9CYAN Uncharacterized protein OS=Spirulina sp. DLM2.Bin59 OX=2480215 GN=EA366_10750 PE=4 SV=1	40.8045	53455000
129	E.LLPLR.R		306.216	2	611.424	611.424	-0.3	680	249.05	>tr|A0A6P2AZJ7|A0A6P2AZJ7_9CYAN Phosphoenolpyruvate synthase OS=Spirulina sp. DLM2.Bin59 OX=2480215 GN=EA366_06245 PE=4 SV=1	30.3222	53120000
130	E.LLPLR.R		306.216	2	611.424	611.424	0.8	680	238.66	>tr|A0A6P2AZJ7|A0A6P2AZJ7_9CYAN Phosphoenolpyruvate synthase OS=Spirulina sp. DLM2.Bin59 OX=2480215 GN=EA366_06245 PE=4 SV=1	29.8094	53120000
131	G.DGRYIAP.L		396.207	2	791.406	791.405	1.7	666	182.41	>tr|A0A6P2AL84|A0A6P2AL84_9CYAN DUF11 domain-containing protein OS=Spirulina sp. DLM2.Bin59 OX=2480215 GN=EA366_14385 PE=4 SV=1	25.3885	52947000
132	S.QFYF.A		604.278	1	604.278	604.277	2.5	197	207.07	>tr|A0A6P2AJE5|A0A6P2AJE5_9CYAN Peptidyl-prolyl cis-trans isomerase OS=Spirulina sp. DLM2.Bin59 OX=2480215 GN=EA366_14290 PE=3 SV=1	50.1791	52602000
133	Q.QQFAAR.T		720.368	1	720.368	720.379	-15.2	129	115.52	>tr|A0A6P2AWS0|A0A6P2AWS0_9CYAN SCP domain-containing protein OS=Spirulina sp. DLM2.Bin59 OX=2480215 GN=EA366_05010 PE=4 SV=1	31.8829	52596000
134	F.QPFQPQQ.P		436.718	2	872.428	872.426	2.6	57	243.25	>tr|A0A6P2APA7|A0A6P2APA7_9CYAN Glycosyltransferase OS=Spirulina sp. DLM2.Bin59 OX=2480215 GN=EA366_11530 PE=4 SV=1	26.4036	52234000
135	S.QQFKK.V		678.394	1	678.394	678.393	1.8	217	105.43	>tr|A0A6P2ASB3|A0A6P2ASB3_9CYAN Uncharacterized protein OS=Spirulina sp. DLM2.Bin59 OX=2480215 GN=EA366_10235 PE=4 SV=1	28.1322	51971000
136	L.VPIYPY.G		376.205	2	751.403	751.403	0	17	198.17	>tr|A0A6P2AZ46|A0A6P2AZ46_9CYAN DUF4336 domain-containing protein OS=Spirulina sp. DLM2.Bin59 OX=2480215 GN=EA366_02940 PE=4 SV=1	44.8182	51825000
137	N.PFLDLF.A		376.205	2	751.403	751.403	-0.1	1640	117.68	>tr|A0A6P2AYU0|A0A6P2AYU0_9CYAN Uncharacterized protein OS=Spirulina sp. DLM2.Bin59 OX=2480215 GN=EA366_04890 PE=4 SV=1	45.3206	51825000
138	L.VYLM[+15.995]PI.L	M[+16]	376.205	2	751.403	751.406	-3.8	18	102.27	>tr|A0A6P2AWD2|A0A6P2AWD2_9CYAN Uncharacterized protein OS=Spirulina sp. DLM2.Bin59 OX=2480215 GN=EA366_06745 PE=3 SV=1	45.8256	51825000
139	A.AATLSNRYISD.R		605.817	2	1210.63	1210.61	16.1	375	146.78	>tr|A0A6P2AYP5|A0A6P2AYP5_9CYAN Chaperone protein ClpB OS=Spirulina sp. DLM2.Bin59 OX=2480215 GN=clpB PE=3 SV=1	34.0162	51164000
140	Q.PLTPGTVSR.G		464.269	2	927.53	927.526	4.6	228	249.17	>tr|A0A6P2ATX1|A0A6P2ATX1_9CYAN Bifunctional aldolase/short-chain dehydrogenase OS=Spirulina sp. DLM2.Bin59 OX=2480215 GN=EA366_09755 PE=4 SV=1	22.0374	50084000
141	K.EFIF.A		555.284	1	555.284	555.281	4.5	583	191.99	>tr|A0A6P2AV51|A0A6P2AV51_9CYAN DUF3536 domain-containing protein OS=Spirulina sp. DLM2.Bin59 OX=2480215 GN=EA366_09155 PE=4 SV=1	60.9194	50015000
142	Y.QSIQQS.N		690.33	1	690.33	690.342	-17.4	184	112.58	>tr|A0A6P2AWZ8|A0A6P2AWZ8_9CYAN Histidine phosphatase family protein OS=Spirulina sp. DLM2.Bin59 OX=2480215 GN=EA366_02185 PE=4 SV=1	17.484	49897000
143	G.TGFLQHP.Q		400.209	2	799.411	799.41	1.7	255	287.11	>tr|A0A6P2AW28|A0A6P2AW28_9CYAN Restriction endonuclease (Fragment) OS=Spirulina sp. DLM2.Bin59 OX=2480215 GN=EA366_08060 PE=4 SV=1	29.0992	49339000
144	S.VDRQALH.A		419.726	2	838.444	838.453	-10.8	15	161.49	>tr|A0A6P2AV16|A0A6P2AV16_9CYAN RNA-binding protein OS=Spirulina sp. DLM2.Bin59 OX=2480215 GN=EA366_09215 PE=4 SV=1	20.7938	49004000
145	L.QQQTAFGY.T		471.722	2	942.436	942.432	5.1	473	132.83	>tr|A0A6P2AUE3|A0A6P2AUE3_9CYAN Glutamate synthase large subunit OS=Spirulina sp. DLM2.Bin59 OX=2480215 GN=EA366_06880 PE=3 SV=1	37.7408	48499000
146	C.AELDYRNAHIHN.E		726.854	2	1452.7	1452.7	1.5	22	104.59	>tr|A0A6P2ATQ8|A0A6P2ATQ8_9CYAN Uncharacterized protein OS=Spirulina sp. DLM2.Bin59 OX=2480215 GN=EA366_10230 PE=4 SV=1	16.766	48439000
147	V.EELSVRYLHAG.E		637.319	2	1273.63	1273.65	-17.9	39	132.1	>tr|A0A6P2APJ0|A0A6P2APJ0_9CYAN DUF3143 domain-containing protein OS=Spirulina sp. DLM2.Bin59 OX=2480215 GN=EA366_12530 PE=4 SV=1	31.733	48246000
148	V.C[+57.021]VY.P	C[+57]	441.182	1	441.182	441.18	3.9	821	160.22	>tr|A0A6P2AVV2|A0A6P2AVV2_9CYAN PAS domain S-box protein OS=Spirulina sp. DLM2.Bin59 OX=2480215 GN=EA366_09255 PE=4 SV=1	23.6152	47743000
149	T.HDYQVK.L		395.198	2	789.39	789.389	0.8	316	215.2	>tr|A0A6P2AZQ5|A0A6P2AZQ5_9CYAN Uncharacterized protein OS=Spirulina sp. DLM2.Bin59 OX=2480215 GN=EA366_01815 PE=4 SV=1	14.5884	47115000
150	E.QLFGQQ.P		720.37	1	720.37	720.367	3	97	146.84	>tr|A0A6P2AXS1|A0A6P2AXS1_9CYAN Uncharacterized protein OS=Spirulina sp. DLM2.Bin59 OX=2480215 GN=EA366_00700 PE=4 SV=1	30.8725	47045000
151	T.QPQPMA.R		671.305	1	671.305	671.318	-19.9	95	149.46	>tr|A0A6P2ATH7|A0A6P2ATH7_9CYAN Uncharacterized protein (Fragment) OS=Spirulina sp. DLM2.Bin59 OX=2480215 GN=EA366_09970 PE=4 SV=1	39.0219	46741000
152	R.SGGIGGFAQQVPD.E		616.805	2	1232.6	1232.59	9.5	454	170.49	>tr|A0A6P2AVF7|A0A6P2AVF7_9CYAN ATP-dependent zinc metalloprotease FtsH OS=Spirulina sp. DLM2.Bin59 OX=2480215 GN=hflB PE=3 SV=1	20.0402	46668000
153	A.QPGGIINGGNLT.T		570.807	2	1140.61	1140.6	5.8	168	122.5	>tr|A0A6P2AWR4|A0A6P2AWR4_9CYAN CHAT domain-containing protein OS=Spirulina sp. DLM2.Bin59 OX=2480215 GN=EA366_06555 PE=4 SV=1	40.4047	46505000
154	E.FIQ.M		407.229	1	407.229	407.229	1.1	836	204.63	>tr|A0A6P2B061|A0A6P2B061_9CYAN Helicase (Fragment) OS=Spirulina sp. DLM2.Bin59 OX=2480215 GN=EA366_05180 PE=4 SV=1	24.1776	46247000
155	E.QPQIFAMLKTE.F		653.339	2	1305.67	1305.69	-12.4	94	100	>tr|A0A6P2AMM2|A0A6P2AMM2_9CYAN HAS-barrel domain-containing protein OS=Spirulina sp. DLM2.Bin59 OX=2480215 GN=EA366_13765 PE=4 SV=1	38.6676	46192000
156	T.TAAQQQELRML.L		644.837	2	1288.67	1288.67	-0.4	274	119.89	>tr|A0A6P2AJL0|A0A6P2AJL0_9CYAN Uncharacterized protein OS=Spirulina sp. DLM2.Bin59 OX=2480215 GN=EA366_15555 PE=4 SV=1	26.5552	45975000
157	M.QPQPM[+15.995]NELIQ.Q	M[+16]	607.306	2	1213.61	1213.59	14.3	410	126.88	>tr|A0A6P2AYR4|A0A6P2AYR4_9CYAN ABC transporter substrate-binding protein OS=Spirulina sp. DLM2.Bin59 OX=2480215 GN=EA366_04995 PE=4 SV=1	48.1164	45916000
158	F.QPAGNLSPQQ.L		520.264	2	1039.52	1039.52	4.8	80	181.78	>tr|A0A6P2ATQ2|A0A6P2ATQ2_9CYAN Serine/threonine protein kinase OS=Spirulina sp. DLM2.Bin59 OX=2480215 GN=EA366_07730 PE=4 SV=1	17.3054	45676000
159	L.GQAPEFAQ.I		847.392	1	847.392	847.394	-2.7	158	160.37	>tr|A0A6P2APF6|A0A6P2APF6_9CYAN Cupin-like domain-containing protein OS=Spirulina sp. DLM2.Bin59 OX=2480215 GN=EA366_12090 PE=4 SV=1	27.0235	45638000
160	R.PHQFP.Q		313.158	2	625.309	625.309	0.4	62	129.2	>tr|A0A6P2AVF1|A0A6P2AVF1_9CYAN ATP-binding protein (Fragment) OS=Spirulina sp. DLM2.Bin59 OX=2480215 GN=EA366_06615 PE=4 SV=1	19.9331	44947000
161	S.VSAGIENVK.R		458.766	2	916.525	916.51	16.6	57	189.78	>tr|A0A6P2ASG8|A0A6P2ASG8_9CYAN BMC domain-containing protein OS=Spirulina sp. DLM2.Bin59 OX=2480215 GN=EA366_09330 PE=3 SV=1	19.8787	44047000
162	V.QSILPH.A		347.698	2	694.388	694.388	0.2	49	167.85	>tr|A0A6P2AZ32|A0A6P2AZ32_9CYAN SGNH_hydro domain-containing protein (Fragment) OS=Spirulina sp. DLM2.Bin59 OX=2480215 GN=EA366_00140 PE=4 SV=1	28.149	43928000
163	V.QSILPH.A		347.698	2	694.389	694.388	0.8	49	147.73	>tr|A0A6P2AZ32|A0A6P2AZ32_9CYAN SGNH_hydro domain-containing protein (Fragment) OS=Spirulina sp. DLM2.Bin59 OX=2480215 GN=EA366_00140 PE=4 SV=1	28.6549	43928000
164	R.QIPDNRFLVG.L		579.82	2	1158.63	1158.63	4.8	422	201.8	>tr|A0A6P2APZ7|A0A6P2APZ7_9CYAN ShlB/FhaC/HecB family hemolysin secretion/activation protein (Fragment) OS=Spirulina sp. DLM2.Bin59 OX=2480215 GN=EA366_11455 PE=4 SV=1	41.1143	43875000
165	L.QQNPIFNQLFE.V		689.343	2	1377.68	1377.68	-0.7	195	100.22	>tr|A0A6P2AX50|A0A6P2AX50_9CYAN Rpn family recombination-promoting nuclease/putative transposase OS=Spirulina sp. DLM2.Bin59 OX=2480215 GN=EA366_03435 PE=4 SV=1	42.6754	43272000
166	I.PQQPFS.R		703.344	1	703.344	703.341	3.7	137	191.21	>tr|A0A6P2AVJ2|A0A6P2AVJ2_9CYAN PAS domain S-box protein OS=Spirulina sp. DLM2.Bin59 OX=2480215 GN=EA366_04855 PE=4 SV=1	55.4049	43245000
167	N.GLETFYFSPQ.G		594.792	2	1188.58	1188.56	15.7	92	133.61	>tr|A0A6P2AVZ1|A0A6P2AVZ1_9CYAN N-acetylmuramoyl-L-alanine amidase (Fragment) OS=Spirulina sp. DLM2.Bin59 OX=2480215 GN=EA366_10140 PE=4 SV=1	41.8917	43062000
168	L.KDQVGGDR.I		874.442	1	874.442	874.438	4.7	223	183.99	>tr|A0A6P2AP36|A0A6P2AP36_9CYAN ATP-binding cassette domain-containing protein OS=Spirulina sp. DLM2.Bin59 OX=2480215 GN=EA366_12340 PE=4 SV=1	27.3558	43011000
169	D.ELF.I		408.214	1	408.214	408.213	1.6	842	159.47	>tr|A0A6P2B061|A0A6P2B061_9CYAN Helicase (Fragment) OS=Spirulina sp. DLM2.Bin59 OX=2480215 GN=EA366_05180 PE=4 SV=1	37.5787	43005000
170	I.AGFL.G		407.23	1	407.23	407.229	1.8	283	119.17	>tr|A0A6P2B117|A0A6P2B117_9CYAN ADP,ATP carrier protein OS=Spirulina sp. DLM2.Bin59 OX=2480215 GN=EA366_03600 PE=3 SV=1	39.2115	43005000
171	A.GAFL.A		407.23	1	407.23	407.229	1.8	122	119.17	>tr|A0A6P2AYJ2|A0A6P2AYJ2_9CYAN NADH-quinone oxidoreductase subunit M OS=Spirulina sp. DLM2.Bin59 OX=2480215 GN=EA366_00850 PE=3 SV=1	39.2115	43005000
172	I.VNQISQQ.L		408.717	2	816.427	816.421	7.8	48	204.42	>tr|A0A6P2AKM2|A0A6P2AKM2_9CYAN Histidine kinase domain-containing protein (Fragment) OS=Spirulina sp. DLM2.Bin59 OX=2480215 GN=EA366_13650 PE=4 SV=1	39.7175	43005000
173	L.TAAVVALP.M		741.451	1	741.451	741.451	0.3	21	134.97	>tr|A0A6P2AS41|A0A6P2AS41_9CYAN SulP family inorganic anion transporter OS=Spirulina sp. DLM2.Bin59 OX=2480215 GN=EA366_11055 PE=3 SV=1	33.5448	42822000
174	Q.IEVLR.S		315.203	2	629.398	629.398	0.1	118	243.28	>tr|A0A6P2ATU9|A0A6P2ATU9_9CYAN Polysaccharide biosynthesis tyrosine autokinase OS=Spirulina sp. DLM2.Bin59 OX=2480215 GN=EA366_08920 PE=4 SV=1	24.7899	42068000
175	S.QLL.P		373.245	1	373.245	373.245	-0.1	513	130.94	>tr|A0A6P2AZJ7|A0A6P2AZJ7_9CYAN Phosphoenolpyruvate synthase OS=Spirulina sp. DLM2.Bin59 OX=2480215 GN=EA366_06245 PE=4 SV=1	30.3401	42050000
176	V.SRPYWLHNN.-		593.788	2	1186.57	1186.58	-4.9	341	131.25	>tr|A0A6P2APK5|A0A6P2APK5_9CYAN Potassium channel protein OS=Spirulina sp. DLM2.Bin59 OX=2480215 GN=EA366_12440 PE=4 SV=1	34.5635	41872000
177	D.YEAIR.D		651.348	1	651.348	651.346	3.6	23	344.28	>tr|A0A6P2AXR2|A0A6P2AXR2_9CYAN Uma2 family endonuclease OS=Spirulina sp. DLM2.Bin59 OX=2480215 GN=EA366_00770 PE=4 SV=1	17.441	41553000
178	I.PEVAPF.T		659.341	1	659.341	659.34	1.1	127	204.96	>tr|A0A6P2AKQ9|A0A6P2AKQ9_9CYAN DUF29 domain-containing protein OS=Spirulina sp. DLM2.Bin59 OX=2480215 GN=EA366_13975 PE=4 SV=1	61.1772	41298000
179	L.AYAFSQ.E		686.315	1	686.315	686.314	1.4	305	142.61	>tr|A0A6P2AV51|A0A6P2AV51_9CYAN DUF3536 domain-containing protein OS=Spirulina sp. DLM2.Bin59 OX=2480215 GN=EA366_09155 PE=4 SV=1	42.7546	41244000
180	K.QPQRVIVDFSSP.N		686.866	2	1372.73	1372.72	2.7	115	123.65	>tr|A0A6P2ARW3|A0A6P2ARW3_9CYAN Arginine--tRNA ligase OS=Spirulina sp. DLM2.Bin59 OX=2480215 GN=argS PE=3 SV=1	42.7546	41244000
181	G.QIEAIR.V		365.217	2	729.426	729.425	0.7	306	261.11	>tr|A0A6P2ATU8|A0A6P2ATU8_9CYAN Uncharacterized protein OS=Spirulina sp. DLM2.Bin59 OX=2480215 GN=EA366_08290 PE=4 SV=1	21.9598	40662000
182	Q.QGAIQPL.T		726.413	1	726.413	726.414	-2.2	223	191.02	>tr|A0A6P2ATX1|A0A6P2ATX1_9CYAN Bifunctional aldolase/short-chain dehydrogenase OS=Spirulina sp. DLM2.Bin59 OX=2480215 GN=EA366_09755 PE=4 SV=1	27.1125	40565000
183	H.GSPQNQH.E		767.348	1	767.348	767.343	7.1	123	151.76	>tr|A0A6P2AK71|A0A6P2AK71_9CYAN Metallophosphoesterase OS=Spirulina sp. DLM2.Bin59 OX=2480215 GN=EA366_14000 PE=3 SV=1	28.7899	40295000
184	K.PVHQEELQPL.R		595.322	2	1189.64	1189.62	13.3	81	109.93	>tr|A0A6P2B2I8|A0A6P2B2I8_9CYAN WD_REPEATS_REGION domain-containing protein OS=Spirulina sp. DLM2.Bin59 OX=2480215 GN=EA366_01235 PE=4 SV=1	26.2181	39991000
185	T.GAPGALGKEN.-		913.481	1	913.481	913.474	7.8	305	119.99	>tr|A0A6P2AYB1|A0A6P2AYB1_9CYAN ABC transporter permease OS=Spirulina sp. DLM2.Bin59 OX=2480215 GN=EA366_02370 PE=4 SV=1	38.5467	39831000
186	P.C[+57.021]PTLPPLPKAAAPE.A	C[+57]	731.388	2	1461.77	1461.78	-5.8	533	116.63	>tr|A0A6P2AXT7|A0A6P2AXT7_9CYAN Serine/threonine-protein phosphatase OS=Spirulina sp. DLM2.Bin59 OX=2480215 GN=EA366_05370 PE=4 SV=1	35.3207	39553000
187	P.QIPHLLAYF.E		551.309	2	1101.61	1101.61	2.1	80	132.21	>tr|A0A6P2AHP8|A0A6P2AHP8_9CYAN Serine/threonine protein kinase OS=Spirulina sp. DLM2.Bin59 OX=2480215 GN=EA366_15520 PE=4 SV=1	43.9369	39084000
188	L.GVDRHLPQQPRC[+57.021]VI.K	C[+57]	837.939	2	1674.87	1674.89	-9.2	51	109.27	>tr|A0A6P2AX91|A0A6P2AX91_9CYAN Serine/threonine protein kinase OS=Spirulina sp. DLM2.Bin59 OX=2480215 GN=EA366_01705 PE=4 SV=1	32.2632	38810000
189	W.TVDDLSTALLM.I		589.801	2	1178.6	1178.6	-1.8	225	120.85	>tr|A0A6P2AY13|A0A6P2AY13_9CYAN CHAT domain-containing protein (Fragment) OS=Spirulina sp. DLM2.Bin59 OX=2480215 GN=EA366_01835 PE=4 SV=1	60.0139	38779000
190	W.TVDDLSTALLM.I		589.801	2	1178.59	1178.6	-2.6	225	186.42	>tr|A0A6P2AY13|A0A6P2AY13_9CYAN CHAT domain-containing protein (Fragment) OS=Spirulina sp. DLM2.Bin59 OX=2480215 GN=EA366_01835 PE=4 SV=1	60.5227	38779000
191	W.TVDDLSTALLM.I		589.801	2	1178.59	1178.6	-2.6	225	114.42	>tr|A0A6P2AY13|A0A6P2AY13_9CYAN CHAT domain-containing protein (Fragment) OS=Spirulina sp. DLM2.Bin59 OX=2480215 GN=EA366_01835 PE=4 SV=1	61.0326	38779000
192	E.DYADF.L		315.621	2	630.234	630.241	-10.5	79	152.39	>tr|A0A6P2AWY8|A0A6P2AWY8_9CYAN PAS domain S-box protein OS=Spirulina sp. DLM2.Bin59 OX=2480215 GN=EA366_02235 PE=4 SV=1	27.5084	38434000
193	P.SLAL.Y		403.257	1	403.257	403.255	3.4	1065	168.35	>tr|A0A6P2AWA4|A0A6P2AWA4_9CYAN Serine/threonine-protein kinase PknK (Fragment) OS=Spirulina sp. DLM2.Bin59 OX=2480215 GN=EA366_04690 PE=4 SV=1	35.7069	37992000
194	Y.IPQGLF.S		674.388	1	674.388	674.387	1.4	558	206.61	>tr|A0A6P2AKL0|A0A6P2AKL0_9CYAN Efflux RND transporter permease subunit OS=Spirulina sp. DLM2.Bin59 OX=2480215 GN=EA366_14490 PE=4 SV=1	50.0255	37548000
195	Q.QFQAH.L		630.291	1	630.291	630.299	-14	48	125.41	>tr|A0A6P2AXI8|A0A6P2AXI8_9CYAN Hybrid sensor histidine kinase/response regulator OS=Spirulina sp. DLM2.Bin59 OX=2480215 GN=EA366_08795 PE=4 SV=1	36.0787	37356000
196	D.QQPPQ.E		597.304	1	597.304	597.299	8.5	203	106.28	>tr|A0A6P2AUZ2|A0A6P2AUZ2_9CYAN Aldo/keto reductase OS=Spirulina sp. DLM2.Bin59 OX=2480215 GN=EA366_07305 PE=4 SV=1	28.8804	36855000
197	K.NLYIKND.A		879.458	1	879.458	879.457	1.4	104	106.86	>tr|A0A6P2AKC1|A0A6P2AKC1_9CYAN Threonine synthase OS=Spirulina sp. DLM2.Bin59 OX=2480215 GN=EA366_14165 PE=3 SV=1	47.4564	36349000
198	D.PVIHPYRH.R		509.791	2	1018.58	1018.56	16.8	54	148.97	>tr|A0A6P2AY80|A0A6P2AY80_9CYAN Asparagine synthetase domain-containing protein (Fragment) OS=Spirulina sp. DLM2.Bin59 OX=2480215 GN=EA366_01490 PE=4 SV=1	31.9765	36063000
199	D.QELEVTG.N		775.374	1	775.374	775.383	-12.4	100	140.49	>tr|A0A6P2AXG9|A0A6P2AXG9_9CYAN Restriction endonuclease subunit R OS=Spirulina sp. DLM2.Bin59 OX=2480215 GN=EA366_01865 PE=4 SV=1	22.4336	35676000
200	P.PAWGSPE.I		743.338	1	743.338	743.336	2.5	10	200.66	>tr|A0A6P2AZ12|A0A6P2AZ12_9CYAN L,D-transpeptidase OS=Spirulina sp. DLM2.Bin59 OX=2480215 GN=EA366_00260 PE=4 SV=1	33.0305	35566000
201	P.EPR.G		401.214	1	401.214	401.214	-0.3	71	125.46	>tr|A0A6P2AS94|A0A6P2AS94_9CYAN EAL domain-containing protein (Fragment) OS=Spirulina sp. DLM2.Bin59 OX=2480215 GN=EA366_10275 PE=4 SV=1	14.608	35140000
202	D.QVEGPFFYGRV.A		649.832	2	1298.66	1298.65	2.2	259	119.96	>tr|A0A6P2AV57|A0A6P2AV57_9CYAN DUF3370 domain-containing protein OS=Spirulina sp. DLM2.Bin59 OX=2480215 GN=EA366_05665 PE=4 SV=1	44.0986	34992000
203	E.QVEYL.W		651.337	1	651.337	651.335	3.3	135	270.23	>tr|A0A6P2ALP3|A0A6P2ALP3_9CYAN Coproporphyrinogen-III oxidase OS=Spirulina sp. DLM2.Bin59 OX=2480215 GN=hemN PE=3 SV=1	44.0986	34992000
204	E.SGVSIPV.T		658.375	1	658.375	658.377	-3.4	20	102.31	>tr|A0A6P2AMF1|A0A6P2AMF1_9CYAN 50S ribosomal protein L3 OS=Spirulina sp. DLM2.Bin59 OX=2480215 GN=rplC PE=3 SV=1	28.7615	34898000
205	E.AATAGAFHL.R		858.453	1	858.453	858.447	7.4	248	159.18	>tr|A0A6P2AQ16|A0A6P2AQ16_9CYAN StlD/DarB family beta-ketosynthase OS=Spirulina sp. DLM2.Bin59 OX=2480215 GN=EA366_11835 PE=4 SV=1	43.0722	34795000
206	A.YQGPW.R		650.296	1	650.296	650.293	4.1	156	159.89	>tr|A0A6P2APV5|A0A6P2APV5_9CYAN Glycogen synthase OS=Spirulina sp. DLM2.Bin59 OX=2480215 GN=glgA PE=3 SV=1	49.4969	34726000
207	A.AATLSNRYISD.R		605.817	2	1210.63	1210.61	17.2	375	117.71	>tr|A0A6P2AYP5|A0A6P2AYP5_9CYAN Chaperone protein ClpB OS=Spirulina sp. DLM2.Bin59 OX=2480215 GN=clpB PE=3 SV=1	32.8584	34408000
208	E.LHLLPL.H		353.236	2	705.465	705.466	-0.9	111	280.93	>tr|A0A6P2AY83|A0A6P2AY83_9CYAN CHAT domain-containing protein OS=Spirulina sp. DLM2.Bin59 OX=2480215 GN=EA366_06150 PE=4 SV=1	52.5416	33562000
209	T.QLWEQQRDRE.P		694.336	2	1387.67	1387.67	-4.4	363	136.04	>tr|A0A6P2AXV1|A0A6P2AXV1_9CYAN Uncharacterized protein (Fragment) OS=Spirulina sp. DLM2.Bin59 OX=2480215 GN=EA366_03270 PE=4 SV=1	45.0316	33537000
210	L.AAVLPFVYPHGAV.T		670.872	2	1340.74	1340.74	0.9	151	151.51	>tr|A0A6P2AWQ0|A0A6P2AWQ0_9CYAN Uncharacterized protein (Fragment) OS=Spirulina sp. DLM2.Bin59 OX=2480215 GN=EA366_06565 PE=4 SV=1	42.8041	33238000
211	N.YSLDSF.S		731.324	1	731.324	731.325	-0.7	35	148.35	>tr|A0A6P2AWY2|A0A6P2AWY2_9CYAN PEP-CTERM sorting domain-containing protein OS=Spirulina sp. DLM2.Bin59 OX=2480215 GN=EA366_03675 PE=4 SV=1	40.3391	33172000
212	V.AGIFVC[+57.021]SQQEQP.L	C[+57]	682.324	2	1363.64	1363.63	7.8	716	117.46	>tr|A0A6P2AWG8|A0A6P2AWG8_9CYAN Cyclic nucleotide-binding domain-containing protein (Fragment) OS=Spirulina sp. DLM2.Bin59 OX=2480215 GN=EA366_03180 PE=4 SV=1	47.8743	33045000
213	F.PRLTIHAQ.H		468.275	2	935.543	935.542	0.5	133	147.77	>tr|A0A6P2AN43|A0A6P2AN43_9CYAN WecB/TagA/CpsF family glycosyltransferase OS=Spirulina sp. DLM2.Bin59 OX=2480215 GN=EA366_15140 PE=4 SV=1	10.027	32985000
214	Q.RLTPQPH.P		424.741	2	848.475	848.474	1.3	79	335.49	>tr|A0A6P2AM86|A0A6P2AM86_9CYAN YlxR family protein OS=Spirulina sp. DLM2.Bin59 OX=2480215 GN=EA366_15790 PE=4 SV=1	14.2569	32932000
215	E.QELVI.K		601.369	1	601.369	601.356	22.7	883	173.99	>tr|A0A6P2B307|A0A6P2B307_9CYAN Histidine kinase (Fragment) OS=Spirulina sp. DLM2.Bin59 OX=2480215 GN=EA366_00285 PE=4 SV=1	26.4651	32781000
216	K.LHHLSR.P		381.73	2	762.452	762.437	20.2	486	100.19	>tr|A0A6P2AW12|A0A6P2AW12_9CYAN DNA repair protein RecN OS=Spirulina sp. DLM2.Bin59 OX=2480215 GN=recN PE=3 SV=1	28.5284	32457000
217	I.HVSPF.N		586.303	1	586.303	586.298	8.7	88	109.26	>tr|A0A6P2AY44|A0A6P2AY44_9CYAN N-acetyltransferase (Fragment) OS=Spirulina sp. DLM2.Bin59 OX=2480215 GN=EA366_06305 PE=4 SV=1	27.4621	31923000
218	H.LPGREPL.P		391.232	2	781.457	781.457	0.4	236	193.01	>tr|A0A6P2AQW5|A0A6P2AQW5_9CYAN DNA ligase (NAD(+)) (Fragment) OS=Spirulina sp. DLM2.Bin59 OX=2480215 GN=ligA PE=3 SV=1	31.7162	31773000
219	P.QQYPS.R		622.285	1	622.285	622.283	3	213	128.13	>tr|A0A6P2ASM1|A0A6P2ASM1_9CYAN 6-phosphogluconolactonase OS=Spirulina sp. DLM2.Bin59 OX=2480215 GN=pgl PE=3 SV=1	16.7786	31639000
220	D.YPT.P		380.182	1	380.182	380.182	0.8	66	159.69	>tr|A0A6P2AWA4|A0A6P2AWA4_9CYAN Serine/threonine-protein kinase PknK (Fragment) OS=Spirulina sp. DLM2.Bin59 OX=2480215 GN=EA366_04690 PE=4 SV=1	16.6837	31109000
221	G.RDVLVR.V		379.238	2	757.469	757.468	1	163	207.2	>tr|A0A6P2AVM2|A0A6P2AVM2_9CYAN Lipid II flippase MurJ (Fragment) OS=Spirulina sp. DLM2.Bin59 OX=2480215 GN=EA366_04695 PE=4 SV=1	16.6837	31109000
222	R.QFL.Q		407.229	1	407.229	407.229	1.5	296	104.12	>tr|A0A6P2ASB7|A0A6P2ASB7_9CYAN 4Fe-4S binding protein (Fragment) OS=Spirulina sp. DLM2.Bin59 OX=2480215 GN=EA366_11310 PE=4 SV=1	39.2832	30667000
223	G.YDALR.L		319.169	2	637.33	637.33	-0.4	640	192.05	>tr|A0A6P2AK88|A0A6P2AK88_9CYAN Phosphoenolpyruvate carboxylase OS=Spirulina sp. DLM2.Bin59 OX=2480215 GN=ppc PE=3 SV=1	17.3389	30125000
224	K.ENYY.L		588.231	1	588.231	588.23	2.2	513	205.91	>tr|A0A6P2AY24|A0A6P2AY24_9CYAN Type IV secretion protein Rhs (Fragment) OS=Spirulina sp. DLM2.Bin59 OX=2480215 GN=EA366_00165 PE=4 SV=1	26.4382	29512000
225	S.QGAPAGRNPW.R		527.272	2	1053.54	1053.52	13.8	495	132.89	>tr|A0A6P2AMG7|A0A6P2AMG7_9CYAN Cytochrome c oxidase subunit 1 OS=Spirulina sp. DLM2.Bin59 OX=2480215 GN=ctaD PE=3 SV=1	18.0788	29355000
226	D.VYPLSF.A		363.203	2	725.398	725.387	16	98	109.12	>tr|A0A6P2AVE5|A0A6P2AVE5_9CYAN DUF4276 family protein OS=Spirulina sp. DLM2.Bin59 OX=2480215 GN=EA366_08220 PE=4 SV=1	25.137	29186000
227	M.IHAVVLL.G		382.755	2	764.504	764.503	1	320	140.89	>tr|A0A6P2ARS6|A0A6P2ARS6_9CYAN SulP family inorganic anion transporter OS=Spirulina sp. DLM2.Bin59 OX=2480215 GN=EA366_11330 PE=3 SV=1	43.4179	28593000
228	P.AGSGLVAF.A		721.388	1	721.388	721.388	0.3	500	127.89	>tr|A0A6P2AP60|A0A6P2AP60_9CYAN Aconitate hydratase B OS=Spirulina sp. DLM2.Bin59 OX=2480215 GN=acnB PE=3 SV=1	36.0667	28592000
229	T.KC[+57.021]DPLRPQ.S	C[+57]	507.264	2	1013.52	1013.52	0.4	79	143.38	>tr|A0A6P2ARG5|A0A6P2ARG5_9CYAN Signal peptidase I OS=Spirulina sp. DLM2.Bin59 OX=2480215 GN=lepB PE=3 SV=1	17.2692	28219000
230	T.FLPW.I		562.305	1	562.305	562.302	5.1	179	199.13	>tr|A0A6P2AM16|A0A6P2AM16_9CYAN Uncharacterized protein OS=Spirulina sp. DLM2.Bin59 OX=2480215 GN=EA366_14085 PE=4 SV=1	58.5049	27907000
231	L.TVIIH.S		582.364	1	582.364	582.361	4.6	261	266.72	>tr|A0A6P2AJA8|A0A6P2AJA8_9CYAN PAS domain-containing sensor histidine kinase OS=Spirulina sp. DLM2.Bin59 OX=2480215 GN=EA366_15930 PE=4 SV=1	26.2981	27816000
232	T.PLRLRIP.P		432.788	2	864.568	864.578	-10.8	367	145.06	>tr|A0A6P2AKN9|A0A6P2AKN9_9CYAN ABC transporter ATP-binding protein OS=Spirulina sp. DLM2.Bin59 OX=2480215 GN=EA366_14975 PE=4 SV=1	47.1596	27768000
233	L.PVLHLP.Q		338.213	2	675.418	675.419	-0.5	264	217.88	>tr|A0A6P2ASR6|A0A6P2ASR6_9CYAN Heterodisulfide reductase OS=Spirulina sp. DLM2.Bin59 OX=2480215 GN=EA366_09620 PE=4 SV=1	33.9273	27763000
234	D.QLQNTPQ.R		828.422	1	828.422	828.421	0.8	435	116.13	>tr|A0A6P2AU52|A0A6P2AU52_9CYAN DUF3084 domain-containing protein OS=Spirulina sp. DLM2.Bin59 OX=2480215 GN=EA366_09390 PE=4 SV=1	44.7628	27662000
235	E.TAAQIDHFY.Q		533.256	2	1065.5	1065.5	4.1	344	125.91	>tr|A0A6P2AUT9|A0A6P2AUT9_9CYAN Type 2 lantipeptide synthetase LanM OS=Spirulina sp. DLM2.Bin59 OX=2480215 GN=lanM PE=4 SV=1	33.0428	27629000
236	N.GLETFYFSPQ.G		594.79	2	1188.57	1188.56	13.6	92	105.22	>tr|A0A6P2AVZ1|A0A6P2AVZ1_9CYAN N-acetylmuramoyl-L-alanine amidase (Fragment) OS=Spirulina sp. DLM2.Bin59 OX=2480215 GN=EA366_10140 PE=4 SV=1	39.8716	27598000
237	V.QTALHT.L		670.353	1	670.353	670.352	1.8	189	173.69	>tr|A0A6P2AQ88|A0A6P2AQ88_9CYAN TIGR02921 family PEP-CTERM protein OS=Spirulina sp. DLM2.Bin59 OX=2480215 GN=EA366_10935 PE=4 SV=1	19.7915	27404000
238	T.SC[+57.021]LIR.K	C[+57]	324.679	2	648.35	648.35	0.6	96	271.81	>tr|A0A6P2AV88|A0A6P2AV88_9CYAN Alpha-D-glucose phosphate-specific phosphoglucomutase OS=Spirulina sp. DLM2.Bin59 OX=2480215 GN=EA366_06855 PE=3 SV=1	19.0033	27397000
239	D.AATIFR.T		678.383	1	678.383	678.393	-14.8	442	106.09	>tr|A0A6P2AYR9|A0A6P2AYR9_9CYAN GAF domain-containing protein OS=Spirulina sp. DLM2.Bin59 OX=2480215 GN=EA366_02780 PE=4 SV=1	51.2504	26923000
240	V.QPQVLLLDEPFG.A		678.353	2	1355.7	1355.72	-16.2	150	136.99	>tr|A0A6P2AYN9|A0A6P2AYN9_9CYAN Sulfate/thiosulfate import ATP-binding protein CysA OS=Spirulina sp. DLM2.Bin59 OX=2480215 GN=cysA PE=3 SV=1	51.2504	26923000
241	F.QPAGNL.S		599.31	1	599.31	599.315	-7.7	80	109.89	>tr|A0A6P2ATQ2|A0A6P2ATQ2_9CYAN Serine/threonine protein kinase OS=Spirulina sp. DLM2.Bin59 OX=2480215 GN=EA366_07730 PE=4 SV=1	37.0336	26763000
242	A.IAQHIAH.H		395.222	2	789.438	789.437	1.2	11	168.3	>tr|A0A6P2B2R6|A0A6P2B2R6_9CYAN ATP-binding protein (Fragment) OS=Spirulina sp. DLM2.Bin59 OX=2480215 GN=EA366_00780 PE=4 SV=1	13.9796	26547000
243	S.QPQPLTL.F		796.456	1	796.456	796.456	-0.2	134	166.83	>tr|A0A6P2AUP5|A0A6P2AUP5_9CYAN Uncharacterized protein OS=Spirulina sp. DLM2.Bin59 OX=2480215 GN=EA366_09120 PE=4 SV=1	32.2049	26524000
244	S.QPQPLTL.F		796.456	1	796.456	796.456	-0.3	134	172.25	>tr|A0A6P2AUP5|A0A6P2AUP5_9CYAN Uncharacterized protein OS=Spirulina sp. DLM2.Bin59 OX=2480215 GN=EA366_09120 PE=4 SV=1	32.7111	26524000
245	S.QPQPLTL.F		796.457	1	796.457	796.456	0.7	134	177.11	>tr|A0A6P2AUP5|A0A6P2AUP5_9CYAN Uncharacterized protein OS=Spirulina sp. DLM2.Bin59 OX=2480215 GN=EA366_09120 PE=4 SV=1	31.6979	26524000
246	E.VSLILRP.L		399.267	2	797.526	797.524	1.9	229	155.57	>tr|A0A6P2AW78|A0A6P2AW78_9CYAN Glutamyl-tRNA reductase OS=Spirulina sp. DLM2.Bin59 OX=2480215 GN=hemA PE=3 SV=1	40.0831	26450000
247	F.QPFQPQ.Q		372.688	2	744.368	744.367	0.8	57	195.33	>tr|A0A6P2APA7|A0A6P2APA7_9CYAN Glycosyltransferase OS=Spirulina sp. DLM2.Bin59 OX=2480215 GN=EA366_11530 PE=4 SV=1	27.13	26436000
248	F.QPFQPQ.Q		372.688	2	744.368	744.367	0.8	57	170.05	>tr|A0A6P2APA7|A0A6P2APA7_9CYAN Glycosyltransferase OS=Spirulina sp. DLM2.Bin59 OX=2480215 GN=EA366_11530 PE=4 SV=1	27.1276	26436000
249	F.QPFQPQ.Q		372.688	2	744.368	744.367	1.2	57	148.53	>tr|A0A6P2APA7|A0A6P2APA7_9CYAN Glycosyltransferase OS=Spirulina sp. DLM2.Bin59 OX=2480215 GN=EA366_11530 PE=4 SV=1	27.6403	26436000
250	L.ATAFFSAQ.G		842.415	1	842.415	842.404	13.3	112	141.71	>tr|A0A6P2AR20|A0A6P2AR20_9CYAN Uncharacterized protein OS=Spirulina sp. DLM2.Bin59 OX=2480215 GN=EA366_10365 PE=4 SV=1	32.501	26193000
251	A.PQDGTTPQ.L		843.396	1	843.396	843.384	13.7	15	163.56	>tr|A0A6P2AIQ8|A0A6P2AIQ8_9CYAN Uncharacterized protein OS=Spirulina sp. DLM2.Bin59 OX=2480215 GN=EA366_15175 PE=4 SV=1	32.501	26193000
252	V.SIGSSLYPQ.D		476.24	2	951.473	951.478	-5.2	676	138.1	>tr|A0A6P2AIH8|A0A6P2AIH8_9CYAN CHASE2 domain-containing protein OS=Spirulina sp. DLM2.Bin59 OX=2480215 GN=EA366_15025 PE=4 SV=1	27.7028	26161000
253	V.QHLDLTPQ.E		476.24	2	951.473	951.489	-17.6	35	102.82	>tr|A0A6P2AXA6|A0A6P2AXA6_9CYAN GTP-binding protein (Fragment) OS=Spirulina sp. DLM2.Bin59 OX=2480215 GN=EA366_03960 PE=4 SV=1	27.1901	26161000
254	L.QQFDH.N		674.294	1	674.294	674.289	7.6	562	127.15	>tr|A0A6P2AIZ2|A0A6P2AIZ2_9CYAN MFS transporter (Fragment) OS=Spirulina sp. DLM2.Bin59 OX=2480215 GN=EA366_16140 PE=4 SV=1	40.9132	26001000
255	W.QQFANI.D		720.368	1	720.368	720.367	0.7	411	141.2	>tr|A0A6P2AWQ3|A0A6P2AWQ3_9CYAN UDP-glucose 6-dehydrogenase OS=Spirulina sp. DLM2.Bin59 OX=2480215 GN=EA366_07335 PE=3 SV=1	31.9624	25660000
256	A.PSSAPLLY.K		847.458	1	847.458	847.456	1.9	341	102.33	>tr|A0A6P2AVV5|A0A6P2AVV5_9CYAN PAS domain S-box protein OS=Spirulina sp. DLM2.Bin59 OX=2480215 GN=EA366_08325 PE=4 SV=1	47.823	25591000
257	I.QPMVH.A		611.296	1	611.296	611.297	-1.9	253	154.42	>tr|A0A6P2ATV2|A0A6P2ATV2_9CYAN ABC transporter substrate-binding protein OS=Spirulina sp. DLM2.Bin59 OX=2480215 GN=EA366_11655 PE=4 SV=1	20.8463	25161000
258	E.LFPQQP.I		365.2	2	729.393	729.393	0.3	108	141.73	>tr|A0A6P2AR22|A0A6P2AR22_9CYAN Pyrroline-5-carboxylate reductase OS=Spirulina sp. DLM2.Bin59 OX=2480215 GN=proC PE=3 SV=1	32.5439	24465000
259	E.LPVP.Q		425.276	1	425.276	425.276	0.9	689	106.5	>tr|A0A6P2AV51|A0A6P2AV51_9CYAN DUF3536 domain-containing protein OS=Spirulina sp. DLM2.Bin59 OX=2480215 GN=EA366_09155 PE=4 SV=1	26.9665	24450000
260	E.ITPPEYQ.Q		424.21	2	847.412	847.42	-8.8	626	129.95	>tr|A0A6P2AUU2|A0A6P2AUU2_9CYAN PAS domain S-box protein (Fragment) OS=Spirulina sp. DLM2.Bin59 OX=2480215 GN=EA366_06535 PE=4 SV=1	26.9665	24450000
261	E.QQLPF.L		632.341	1	632.341	632.34	1.7	373	210.06	>tr|A0A6P2AY93|A0A6P2AY93_9CYAN CTP synthase OS=Spirulina sp. DLM2.Bin59 OX=2480215 GN=pyrG PE=3 SV=1	46.7907	23937000
262	A.QAGIDQ.L		631.31	1	631.31	631.305	7.9	362	120.45	>tr|A0A6P2AH27|A0A6P2AH27_9CYAN tRNA modification GTPase MnmE OS=Spirulina sp. DLM2.Bin59 OX=2480215 GN=mnmE PE=3 SV=1	46.7907	23937000
263	S.YNILDR.F		397.214	2	793.422	793.42	1.8	531	214.74	>tr|A0A6P2AY51|A0A6P2AY51_9CYAN TolC family protein OS=Spirulina sp. DLM2.Bin59 OX=2480215 GN=EA366_06260 PE=3 SV=1	31.2825	23350000
264	R.PLNLPQ.P		341.2	2	681.392	681.393	-1.4	62	118.85	>tr|A0A6P2AX20|A0A6P2AX20_9CYAN Glycine dehydrogenase (decarboxylating) OS=Spirulina sp. DLM2.Bin59 OX=2480215 GN=gcvP PE=3 SV=1	36.828	23183000
265	H.QIYPL.F		633.362	1	633.362	633.361	1.7	196	137.26	>tr|A0A6P2ARB8|A0A6P2ARB8_9CYAN Magnesium-protoporphyrin IX monomethyl ester [oxidative] cyclase OS=Spirulina sp. DLM2.Bin59 OX=2480215 GN=acsF PE=3 SV=1	47.4536	22738000
266	G.IFQ.T		407.23	1	407.23	407.229	1.8	476	129.97	>tr|A0A6P2AS94|A0A6P2AS94_9CYAN EAL domain-containing protein (Fragment) OS=Spirulina sp. DLM2.Bin59 OX=2480215 GN=EA366_10275 PE=4 SV=1	21.3877	22716000
267	L.VEPDQVAG.L		407.698	2	814.389	814.394	-6	307	148.28	>tr|A0A6P2AZN8|A0A6P2AZN8_9CYAN Glycosyltransferase OS=Spirulina sp. DLM2.Bin59 OX=2480215 GN=EA366_06060 PE=4 SV=1	21.3877	22716000
268	A.QQSQGN.A		661.293	1	661.293	661.29	4.6	392	167.49	>tr|A0A6P2AY85|A0A6P2AY85_9CYAN Dioxygenase OS=Spirulina sp. DLM2.Bin59 OX=2480215 GN=EA366_07905 PE=3 SV=1	41.2398	21948000
269	D.VHYGQFLAPGV.I		594.313	2	1187.62	1187.62	-1.6	78	109.99	>tr|A0A6P2APZ1|A0A6P2APZ1_9CYAN Transport permease protein OS=Spirulina sp. DLM2.Bin59 OX=2480215 GN=EA366_12335 PE=3 SV=1	47.6907	21760000
270	D.VHYGQFLAPGV.I		594.312	2	1187.62	1187.62	-3.1	78	142.06	>tr|A0A6P2APZ1|A0A6P2APZ1_9CYAN Transport permease protein OS=Spirulina sp. DLM2.Bin59 OX=2480215 GN=EA366_12335 PE=3 SV=1	47.161	21760000
271	E.QLTLGHGL.L		419.743	2	838.479	838.478	1.1	42	156.4	>tr|A0A6P2AM84|A0A6P2AM84_9CYAN Asparagine synthetase B (Fragment) OS=Spirulina sp. DLM2.Bin59 OX=2480215 GN=EA366_12970 PE=3 SV=1	15.3621	21355000
272	R.PHQFPQ.S		377.188	2	753.369	753.368	1.1	62	201.91	>tr|A0A6P2AVF1|A0A6P2AVF1_9CYAN ATP-binding protein (Fragment) OS=Spirulina sp. DLM2.Bin59 OX=2480215 GN=EA366_06615 PE=4 SV=1	22.0346	21231000
273	F.PDYLPEQVR.Q		558.785	2	1116.56	1116.57	-4.9	146	185.52	>tr|A0A6P2AYQ7|A0A6P2AYQ7_9CYAN CO2 hydration protein OS=Spirulina sp. DLM2.Bin59 OX=2480215 GN=EA366_00845 PE=4 SV=1	14.857	21227000
274	G.IQIPF.P		617.367	1	617.367	617.366	2.9	275	152.14	>tr|A0A6P2AZK1|A0A6P2AZK1_9CYAN Mechanosensitive ion channel family protein OS=Spirulina sp. DLM2.Bin59 OX=2480215 GN=EA366_03510 PE=3 SV=1	60.477	21212000
275	K.ISIIPR.G		349.732	2	698.456	698.456	-0.1	443	147.25	>tr|A0A6P2B2T6|A0A6P2B2T6_9CYAN ATP-dependent zinc metalloprotease FtsH OS=Spirulina sp. DLM2.Bin59 OX=2480215 GN=ftsH PE=3 SV=1	34.6475	21110000
276	K.LSM.T		350.171	1	350.171	350.174	-9.5	462	116.72	>tr|A0A6P2ASB7|A0A6P2ASB7_9CYAN 4Fe-4S binding protein (Fragment) OS=Spirulina sp. DLM2.Bin59 OX=2480215 GN=EA366_11310 PE=4 SV=1	34.6475	21110000
277	R.QLPHKFTV.W		485.28	2	969.552	969.552	0.7	62	230.82	>tr|A0A6P2AZL4|A0A6P2AZL4_9CYAN Uncharacterized protein OS=Spirulina sp. DLM2.Bin59 OX=2480215 GN=EA366_02045 PE=4 SV=1	21.4017	20874000
278	R.QLPHKFTV.W		485.28	2	969.553	969.552	1.8	62	226.26	>tr|A0A6P2AZL4|A0A6P2AZL4_9CYAN Uncharacterized protein OS=Spirulina sp. DLM2.Bin59 OX=2480215 GN=EA366_02045 PE=4 SV=1	20.8923	20874000
279	L.THPQTQVR.L		483.757	2	966.506	966.512	-5.9	205	169.68	>tr|A0A6P2AN41|A0A6P2AN41_9CYAN Histidine phosphatase family protein OS=Spirulina sp. DLM2.Bin59 OX=2480215 GN=EA366_13550 PE=4 SV=1	20.8923	20874000
280	G.VTF.Y		366.202	1	366.202	366.202	-0.5	217	192.94	>tr|A0A6P2AWA4|A0A6P2AWA4_9CYAN Serine/threonine-protein kinase PknK (Fragment) OS=Spirulina sp. DLM2.Bin59 OX=2480215 GN=EA366_04690 PE=4 SV=1	31.5034	20824000
281	L.EKYL.T		552.304	1	552.304	552.303	2.7	348	174.98	>tr|A0A6P2AK88|A0A6P2AK88_9CYAN Phosphoenolpyruvate carboxylase OS=Spirulina sp. DLM2.Bin59 OX=2480215 GN=ppc PE=3 SV=1	21.7858	20698000
282	G.SLGYSPSQNF.V		550.264	2	1099.52	1099.51	13.2	278	133.05	>tr|A0A6P2AJD3|A0A6P2AJD3_9CYAN Uncharacterized protein OS=Spirulina sp. DLM2.Bin59 OX=2480215 GN=EA366_14755 PE=4 SV=1	21.7858	20698000
283	L.TTLFPHT.V		816.425	1	816.425	816.425	0.2	78	148.13	>tr|A0A6P2AU31|A0A6P2AU31_9CYAN Probable endolytic peptidoglycan transglycosylase RlpA OS=Spirulina sp. DLM2.Bin59 OX=2480215 GN=rlpA PE=3 SV=1	50.675	20585000
284	T.QQFIPQ.A		760.399	1	760.399	760.399	0.3	64	126.85	>tr|A0A6P2AWK3|A0A6P2AWK3_9CYAN Uncharacterized protein OS=Spirulina sp. DLM2.Bin59 OX=2480215 GN=EA366_07385 PE=4 SV=1	30.1655	20240000
285	C.PVLGGLP.L		652.404	1	652.404	652.403	2	15	215.48	>tr|A0A6P2B1C4|A0A6P2B1C4_9CYAN Pyruvate phosphate dikinase PEP/pyruvate-binding protein OS=Spirulina sp. DLM2.Bin59 OX=2480215 GN=EA366_03000 PE=4 SV=1	35.6289	20180000
286	G.EWVNAPGA.E		843.401	1	843.401	843.399	1.4	321	196.85	>tr|A0A6P2AYN0|A0A6P2AYN0_9CYAN 4-alpha-glucanotransferase OS=Spirulina sp. DLM2.Bin59 OX=2480215 GN=malQ PE=3 SV=1	37.5061	19946000
287	T.KDTERFH.N		466.733	2	932.459	932.458	0.8	615	128.59	>tr|A0A6P2AQ88|A0A6P2AQ88_9CYAN TIGR02921 family PEP-CTERM protein OS=Spirulina sp. DLM2.Bin59 OX=2480215 GN=EA366_10935 PE=4 SV=1	11.6274	19745000
288	P.QPFPLGDLPT.V		542.798	2	1084.59	1084.57	19.9	75	107.75	>tr|A0A6P2AJI8|A0A6P2AJI8_9CYAN Uncharacterized protein OS=Spirulina sp. DLM2.Bin59 OX=2480215 GN=EA366_15165 PE=4 SV=1	42.8799	19607000
289	Y.QQLVRGVQRF.F		615.864	2	1230.72	1230.71	11.4	403	112.77	>tr|A0A6P2AM76|A0A6P2AM76_9CYAN Uncharacterized protein (Fragment) OS=Spirulina sp. DLM2.Bin59 OX=2480215 GN=EA366_12515 PE=4 SV=1	47.2891	19538000
290	A.PFPI.A		473.277	1	473.277	473.276	1.9	42	116.63	>tr|A0A6P2AYH9|A0A6P2AYH9_9CYAN ShlB/FhaC/HecB family hemolysin secretion/activation protein OS=Spirulina sp. DLM2.Bin59 OX=2480215 GN=EA366_05580 PE=4 SV=1	62.221	19447000
291	Y.LTNAVAAPLS.T		478.777	2	956.546	956.541	4.9	178	104.33	>tr|A0A6P2AWX2|A0A6P2AWX2_9CYAN Protein translocase subunit SecD OS=Spirulina sp. DLM2.Bin59 OX=2480215 GN=secD PE=3 SV=1	28.3445	19411000
292	F.GGGGYKVSGGLHG.V		573.289	2	1145.57	1145.57	1.1	104	126.91	>tr|A0A6P2B0L2|A0A6P2B0L2_9CYAN DNA gyrase subunit B OS=Spirulina sp. DLM2.Bin59 OX=2480215 GN=gyrB PE=3 SV=1	20.0266	19395000
293	L.IVIDEC[+57.021]HRGS.A	C[+57]	395.861	3	1185.57	1185.57	1	288	103.49	>tr|A0A6P2ANT8|A0A6P2ANT8_9CYAN DEAD/DEAH box helicase (Fragment) OS=Spirulina sp. DLM2.Bin59 OX=2480215 GN=EA366_14625 PE=4 SV=1	14.4929	19364000
294	R.QIPQQQP.Q		419.726	2	838.444	838.442	2.6	265	144.36	>tr|A0A6P2AL02|A0A6P2AL02_9CYAN Orotate phosphoribosyltransferase OS=Spirulina sp. DLM2.Bin59 OX=2480215 GN=pyrE PE=3 SV=1	16.618	19305000
295	D.FEVYG.K		614.293	1	614.293	614.282	18	79	119.84	>tr|A0A6P2AZ95|A0A6P2AZ95_9CYAN Uncharacterized protein (Fragment) OS=Spirulina sp. DLM2.Bin59 OX=2480215 GN=EA366_01880 PE=4 SV=1	19.2576	19019000
296	E.LC[+57.021]GIC[+57.021]GR.-	C[+57]*2	418.201	2	835.394	835.391	3.6	321	129.84	>tr|A0A6P2ASX7|A0A6P2ASX7_9CYAN DNA polymerase III subunit delta OS=Spirulina sp. DLM2.Bin59 OX=2480215 GN=holA PE=4 SV=1	17.8116	18948000
297	S.LAPHFPR.V		419.242	2	837.476	837.473	3.9	242	107.24	>tr|A0A6P2AW05|A0A6P2AW05_9CYAN Cation-transporting P-type ATPase (Fragment) OS=Spirulina sp. DLM2.Bin59 OX=2480215 GN=EA366_06205 PE=4 SV=1	17.8116	18948000
298	L.ALQLPQQ.I		797.451	1	797.451	797.452	-0.8	340	113.34	>tr|A0A6P2AQJ2|A0A6P2AQJ2_9CYAN Serine/threonine-protein phosphatase OS=Spirulina sp. DLM2.Bin59 OX=2480215 GN=EA366_10765 PE=4 SV=1	26.8739	18852000
299	T.QQPQWFP.D		465.73	2	930.452	930.447	5.7	118	138.16	>tr|A0A6P2AS94|A0A6P2AS94_9CYAN EAL domain-containing protein (Fragment) OS=Spirulina sp. DLM2.Bin59 OX=2480215 GN=EA366_10275 PE=4 SV=1	47.9817	18458000
300	A.EREQLTK.P		452.249	2	903.491	903.489	1.8	290	140.61	>tr|A0A6P2AS31|A0A6P2AS31_9CYAN Urea ABC transporter permease subunit UrtC (Fragment) OS=Spirulina sp. DLM2.Bin59 OX=2480215 GN=urtC PE=4 SV=1	11.8499	18304000
301	N.NFP.L		377.182	1	377.182	377.182	1	89	101.57	>tr|A0A6P2B117|A0A6P2B117_9CYAN ADP,ATP carrier protein OS=Spirulina sp. DLM2.Bin59 OX=2480215 GN=EA366_03600 PE=3 SV=1	27.5511	17985000
302	L.NLLILGQNYH.L		592.829	2	1184.65	1184.64	7.2	230	202.72	>tr|A0A6P2AXF7|A0A6P2AXF7_9CYAN Beta-carotene hydroxylase OS=Spirulina sp. DLM2.Bin59 OX=2480215 GN=EA366_06030 PE=4 SV=1	32.6512	17775000
303	V.VGF.E		322.176	1	322.176	322.176	0.4	536	180.19	>tr|A0A6P2AS94|A0A6P2AS94_9CYAN EAL domain-containing protein (Fragment) OS=Spirulina sp. DLM2.Bin59 OX=2480215 GN=EA366_10275 PE=4 SV=1	29.6846	17561000
304	E.PSQPRPWWRN.L		662.343	2	1323.68	1323.67	6.2	442	178.51	>tr|A0A6P2ATE3|A0A6P2ATE3_9CYAN DUF2330 domain-containing protein OS=Spirulina sp. DLM2.Bin59 OX=2480215 GN=EA366_08360 PE=4 SV=1	16.967	17481000
305	L.EFLIEDLPQ.L		552.286	2	1103.56	1103.56	1.8	486	118.43	>tr|A0A6P2AX64|A0A6P2AX64_9CYAN PAS domain S-box protein OS=Spirulina sp. DLM2.Bin59 OX=2480215 GN=EA366_01840 PE=4 SV=1	16.6991	17463000
306	I.WQFPQ.G		705.337	1	705.337	705.336	2.4	193	200.67	>tr|A0A6P2AUC5|A0A6P2AUC5_9CYAN Geranylgeranyl reductase family protein (Fragment) OS=Spirulina sp. DLM2.Bin59 OX=2480215 GN=EA366_11315 PE=4 SV=1	47.7696	17403000
307	L.QAFSQSLTAQ.D		540.762	2	1080.52	1080.53	-14.6	264	127.95	>tr|A0A6P2AT64|A0A6P2AT64_9CYAN Alpha/beta hydrolase OS=Spirulina sp. DLM2.Bin59 OX=2480215 GN=EA366_08585 PE=4 SV=1	41.105	17332000
308	G.IPQTLPI.P		391.245	2	781.482	781.482	-0.1	130	191.03	>tr|A0A6P2AX28|A0A6P2AX28_9CYAN UDP-glucose 4-epimerase OS=Spirulina sp. DLM2.Bin59 OX=2480215 GN=galE PE=3 SV=1	22.1206	17180000
309	A.PVFGGV.N		575.321	1	575.321	575.319	3.9	204	133.35	>tr|A0A6P2AZZ1|A0A6P2AZZ1_9CYAN NAD-dependent malic enzyme OS=Spirulina sp. DLM2.Bin59 OX=2480215 GN=EA366_05520 PE=4 SV=1	39.4418	17117000
310	H.GSPQNQH.E		767.348	1	767.348	767.343	7.1	123	153.11	>tr|A0A6P2AK71|A0A6P2AK71_9CYAN Metallophosphoesterase OS=Spirulina sp. DLM2.Bin59 OX=2480215 GN=EA366_14000 PE=3 SV=1	28.7941	17000000
311	E.QQLPF.L		632.34	1	632.34	632.34	-1.1	373	195.2	>tr|A0A6P2AY93|A0A6P2AY93_9CYAN CTP synthase OS=Spirulina sp. DLM2.Bin59 OX=2480215 GN=pyrG PE=3 SV=1	59.8707	16982000
312	G.QITTISGRY.Y		519.785	2	1038.56	1038.56	4.7	181	107.07	>tr|A0A6P2AMN0|A0A6P2AMN0_9CYAN 2,3-bisphosphoglycerate-independent phosphoglycerate mutase OS=Spirulina sp. DLM2.Bin59 OX=2480215 GN=gpmI PE=3 SV=1	24.9088	16964000
313	S.TM[+15.995]LPLG.T	M[+16]	647.352	1	647.352	647.343	14.2	7	126.77	>tr|A0A6P2AXB6|A0A6P2AXB6_9CYAN Thioredoxin family protein OS=Spirulina sp. DLM2.Bin59 OX=2480215 GN=EA366_01600 PE=4 SV=1	47.601	16874000
314	P.QPQPELRS.Q		477.757	2	954.507	954.5	7.1	186	164.34	>tr|A0A6P2AIP1|A0A6P2AIP1_9CYAN Glycosyltransferase family 4 protein OS=Spirulina sp. DLM2.Bin59 OX=2480215 GN=EA366_14745 PE=4 SV=1	38.996	16240000
315	G.QQVTMAPATSF.A		590.795	2	1180.58	1180.57	13.7	121	165.47	>tr|A0A6P2ARZ0|A0A6P2ARZ0_9CYAN Uncharacterized protein OS=Spirulina sp. DLM2.Bin59 OX=2480215 GN=EA366_11170 PE=4 SV=1	10.6323	16106000
316	M.VAANQPLPL.Q		922.538	1	922.538	922.536	2.8	118	137.2	>tr|A0A6P2AWD8|A0A6P2AWD8_9CYAN Uncharacterized protein OS=Spirulina sp. DLM2.Bin59 OX=2480215 GN=EA366_07695 PE=4 SV=1	42.5498	16056000
317	L.FDPY.N		541.232	1	541.232	541.229	5.3	273	150.68	>tr|A0A6P2ATQ2|A0A6P2ATQ2_9CYAN Serine/threonine protein kinase OS=Spirulina sp. DLM2.Bin59 OX=2480215 GN=EA366_07730 PE=4 SV=1	42.576	15966000
318	T.FEELR.I		347.183	2	693.358	693.357	1.7	477	133.19	>tr|A0A6P2B1K3|A0A6P2B1K3_9CYAN Glutamate synthase large subunit OS=Spirulina sp. DLM2.Bin59 OX=2480215 GN=EA366_02595 PE=3 SV=1	22.6949	15906000
319	P.HAILLQ.A		694.426	1	694.426	694.425	1.6	662	272.94	>tr|A0A6P2ANY1|A0A6P2ANY1_9CYAN DEAD/DEAH box helicase (Fragment) OS=Spirulina sp. DLM2.Bin59 OX=2480215 GN=EA366_12030 PE=4 SV=1	27.7669	15830000
320	V.QPQIIA.V		669.394	1	669.394	669.393	2.2	55	131.56	>tr|A0A6P2AXI3|A0A6P2AXI3_9CYAN CelD_N domain-containing protein OS=Spirulina sp. DLM2.Bin59 OX=2480215 GN=EA366_01805 PE=4 SV=1	37.169	15800000
321	D.TPFGSPSDALIT.G		603.315	2	1205.62	1205.6	15	30	135.86	>tr|A0A6P2AWG1|A0A6P2AWG1_9CYAN S-methyl-5'-thioadenosine phosphorylase OS=Spirulina sp. DLM2.Bin59 OX=2480215 GN=mtnP PE=3 SV=1	45.9271	15800000
322	G.QPLSPEDLN.L		506.758	2	1012.51	1012.49	14.5	22	144.38	>tr|A0A6P2AYS6|A0A6P2AYS6_9CYAN Uncharacterized protein (Fragment) OS=Spirulina sp. DLM2.Bin59 OX=2480215 GN=EA366_03560 PE=4 SV=1	18.3271	15578000
323	R.YTTAY.M		618.28	1	618.28	618.277	4.9	364	183.97	>tr|A0A6P2AQ16|A0A6P2AQ16_9CYAN StlD/DarB family beta-ketosynthase OS=Spirulina sp. DLM2.Bin59 OX=2480215 GN=EA366_11835 PE=4 SV=1	27.6543	15546000
324	P.SVPTGLFDKS.E		525.785	2	1050.56	1050.55	14.9	194	142.64	>tr|A0A6P2AWQ2|A0A6P2AWQ2_9CYAN Phycobilisome rod-core linker polypeptide CpcG OS=Spirulina sp. DLM2.Bin59 OX=2480215 GN=EA366_09565 PE=3 SV=1	36.6602	15394000
325	P.QIPHLLAYF.E		551.308	2	1101.61	1101.61	0.3	80	160.74	>tr|A0A6P2AHP8|A0A6P2AHP8_9CYAN Serine/threonine protein kinase OS=Spirulina sp. DLM2.Bin59 OX=2480215 GN=EA366_15520 PE=4 SV=1	42.7275	15316000
326	L.QQPFQPF.P		891.437	1	891.437	891.436	1.2	264	119.57	>tr|A0A6P2AHT1|A0A6P2AHT1_9CYAN Type II/IV secretion system protein OS=Spirulina sp. DLM2.Bin59 OX=2480215 GN=EA366_15460 PE=3 SV=1	42.7261	15289000
327	D.LAEPWRQPQTV.R		662.855	2	1324.7	1324.7	1	264	116.15	>tr|A0A6P2AIR1|A0A6P2AIR1_9CYAN Precorrin-3B C(17)-methyltransferase OS=Spirulina sp. DLM2.Bin59 OX=2480215 GN=cobJ PE=4 SV=1	45.322	15076000
328	A.IRTDMDALP.I		1031.53	1	1031.53	1031.52	6.5	76	190.02	>tr|A0A6P2AN64|A0A6P2AN64_9CYAN Amidohydrolase (Fragment) OS=Spirulina sp. DLM2.Bin59 OX=2480215 GN=EA366_12150 PE=4 SV=1	45.5128	15004000
329	T.QPVIF.T		603.353	1	603.353	603.35	4.7	359	157.45	>tr|A0A6P2APB1|A0A6P2APB1_9CYAN Beta sliding clamp OS=Spirulina sp. DLM2.Bin59 OX=2480215 GN=EA366_12610 PE=3 SV=1	49.5457	14914000
330	M.QPQPM[+15.995]NELIQ.Q	M[+16]	607.305	2	1213.6	1213.59	12.5	410	145.89	>tr|A0A6P2AYR4|A0A6P2AYR4_9CYAN ABC transporter substrate-binding protein OS=Spirulina sp. DLM2.Bin59 OX=2480215 GN=EA366_04995 PE=4 SV=1	49.5457	14914000
331	Y.QPQKADFYLT.V		605.817	2	1210.63	1210.61	12.9	197	110.95	>tr|A0A6P2ART6|A0A6P2ART6_9CYAN Glycosyltransferase family 4 protein OS=Spirulina sp. DLM2.Bin59 OX=2480215 GN=EA366_10630 PE=4 SV=1	49.5457	14914000
332	D.FSHPY.Y		650.297	1	650.297	650.293	6	1249	140.8	>tr|A0A6P2AWR4|A0A6P2AWR4_9CYAN CHAT domain-containing protein OS=Spirulina sp. DLM2.Bin59 OX=2480215 GN=EA366_06555 PE=4 SV=1	49.636	14903000
333	R.QGAGAAYPFQI.P		561.789	2	1122.57	1122.56	10.8	546	104.56	>tr|A0A6P2AWT8|A0A6P2AWT8_9CYAN FAD-dependent oxidoreductase OS=Spirulina sp. DLM2.Bin59 OX=2480215 GN=EA366_05960 PE=4 SV=1	20.9265	14765000
334	P.SAAVDTS.V		325.66	2	650.313	650.299	21.7	96	167.85	>tr|A0A6P2AXP4|A0A6P2AXP4_9CYAN 16S rRNA m5C967 methyltransferase OS=Spirulina sp. DLM2.Bin59 OX=2480215 GN=EA366_08580 PE=3 SV=1	14.6698	14726000
335	D.PLFGGGAPEPLP.K		576.31	2	1151.61	1151.61	2.6	217	183.02	>tr|A0A6P2AX12|A0A6P2AX12_9CYAN Phosphoglucomutase/phosphomannomutase family protein OS=Spirulina sp. DLM2.Bin59 OX=2480215 GN=EA366_03680 PE=3 SV=1	22.3754	14648000
336	R.QPKLSQ.V		700.409	1	700.409	700.399	15.1	73	102.01	>tr|A0A6P2AYP5|A0A6P2AYP5_9CYAN Chaperone protein ClpB OS=Spirulina sp. DLM2.Bin59 OX=2480215 GN=clpB PE=3 SV=1	17.4503	14466000
337	Q.TRAYLE.G		376.701	2	752.394	752.394	0.5	113	139.31	>tr|A0A6P2AZ06|A0A6P2AZ06_9CYAN Uncharacterized protein (Fragment) OS=Spirulina sp. DLM2.Bin59 OX=2480215 GN=EA366_04545 PE=4 SV=1	31.8042	14444000
338	V.EIQPGMAIDPQ.G		599.797	2	1198.59	1198.58	7.2	11	106.08	>tr|A0A6P2AWQ0|A0A6P2AWQ0_9CYAN Uncharacterized protein (Fragment) OS=Spirulina sp. DLM2.Bin59 OX=2480215 GN=EA366_06565 PE=4 SV=1	30.5701	14293000
339	T.QLQVNSQQLDLS.L		686.848	2	1372.69	1372.71	-12.5	685	143.14	>tr|A0A6P2AUL3|A0A6P2AUL3_9CYAN Single-stranded-DNA-specific exonuclease RecJ OS=Spirulina sp. DLM2.Bin59 OX=2480215 GN=recJ PE=3 SV=1	52.259	14164000
340	D.QQLGEI.G		687.383	1	687.383	687.367	22.7	432	153.4	>tr|A0A6P2AYH0|A0A6P2AYH0_9CYAN Hydroxylamine reductase OS=Spirulina sp. DLM2.Bin59 OX=2480215 GN=hcp PE=3 SV=1	52.259	14164000
341	T.QQLADI.M		687.383	1	687.383	687.367	22.7	632	153.4	>tr|A0A6P2ARM5|A0A6P2ARM5_9CYAN PAS domain S-box protein OS=Spirulina sp. DLM2.Bin59 OX=2480215 GN=EA366_10430 PE=4 SV=1	52.259	14164000
342	A.IAPRFLA.E		394.245	2	787.483	787.482	1.2	23	101.12	>tr|A0A6P2ASH2|A0A6P2ASH2_9CYAN Uncharacterized protein OS=Spirulina sp. DLM2.Bin59 OX=2480215 GN=EA366_12370 PE=4 SV=1	23.674	14152000
343	F.QPFQPQ.Q		744.355	1	744.355	744.367	-16.8	57	157.67	>tr|A0A6P2APA7|A0A6P2APA7_9CYAN Glycosyltransferase OS=Spirulina sp. DLM2.Bin59 OX=2480215 GN=EA366_11530 PE=4 SV=1	57.8436	14131000
344	D.QPLFQA.L		703.377	1	703.377	703.377	-0.5	394	157.82	>tr|A0A6P2AK15|A0A6P2AK15_9CYAN Uncharacterized protein OS=Spirulina sp. DLM2.Bin59 OX=2480215 GN=EA366_15415 PE=4 SV=1	42.8084	14026000
345	A.HIPLG.Y		536.322	1	536.322	536.319	4.6	195	132.38	>tr|A0A6P2ASR3|A0A6P2ASR3_9CYAN DUF1868 domain-containing protein OS=Spirulina sp. DLM2.Bin59 OX=2480215 GN=EA366_09375 PE=4 SV=1	31.7748	13999000
346	T.NNLIQQAGQ.H		493.261	2	985.514	985.506	7.9	203	149.32	>tr|A0A6P2AWW7|A0A6P2AWW7_9CYAN Uncharacterized protein (Fragment) OS=Spirulina sp. DLM2.Bin59 OX=2480215 GN=EA366_02350 PE=4 SV=1	39.5684	13894000
347	T.SFMG.Q		441.176	1	441.176	441.18	-8.8	336	116.02	>tr|A0A6P2AW39|A0A6P2AW39_9CYAN Histidine kinase OS=Spirulina sp. DLM2.Bin59 OX=2480215 GN=EA366_08045 PE=4 SV=1	37.9722	13844000
348	G.YDALR.L		637.332	1	637.332	637.33	2.5	640	111.44	>tr|A0A6P2AK88|A0A6P2AK88_9CYAN Phosphoenolpyruvate carboxylase OS=Spirulina sp. DLM2.Bin59 OX=2480215 GN=ppc PE=3 SV=1	17.5488	13835000
349	D.QPLGIF.V		674.389	1	674.389	674.387	2.8	659	219.55	>tr|A0A6P2AUW9|A0A6P2AUW9_9CYAN Phenylalanine--tRNA ligase beta subunit OS=Spirulina sp. DLM2.Bin59 OX=2480215 GN=pheT PE=3 SV=1	50.5813	13711000
350	F.APEQLQR.A		421.23	2	841.452	841.453	-0.2	39	106.91	>tr|A0A6P2ALP3|A0A6P2ALP3_9CYAN Coproporphyrinogen-III oxidase OS=Spirulina sp. DLM2.Bin59 OX=2480215 GN=hemN PE=3 SV=1	10.9583	13621000
351	Y.VGSSNLTFS.G		456.234	2	911.462	911.447	16.1	158	130.89	>tr|A0A6P2ALY0|A0A6P2ALY0_9CYAN NgoFVII family restriction endonuclease OS=Spirulina sp. DLM2.Bin59 OX=2480215 GN=EA366_13230 PE=4 SV=1	16.78	13554000
352	E.LPVP.Q		425.277	1	425.277	425.276	2.4	689	100.99	>tr|A0A6P2AV51|A0A6P2AV51_9CYAN DUF3536 domain-containing protein OS=Spirulina sp. DLM2.Bin59 OX=2480215 GN=EA366_09155 PE=4 SV=1	26.3741	13505000
353	M.AAYL.Q		437.241	1	437.241	437.24	3.4	818	146.32	>tr|A0A6P2AWA4|A0A6P2AWA4_9CYAN Serine/threonine-protein kinase PknK (Fragment) OS=Spirulina sp. DLM2.Bin59 OX=2480215 GN=EA366_04690 PE=4 SV=1	31.1994	13430000
354	L.LYQPH.T		329.171	2	657.335	657.336	-0.5	60	127.9	>tr|A0A6P2AL79|A0A6P2AL79_9CYAN Heat-inducible transcription repressor HrcA OS=Spirulina sp. DLM2.Bin59 OX=2480215 GN=hrcA PE=3 SV=1	21.126	13303000
355	G.IFQ.T		407.229	1	407.229	407.229	0.3	476	149.67	>tr|A0A6P2AS94|A0A6P2AS94_9CYAN EAL domain-containing protein (Fragment) OS=Spirulina sp. DLM2.Bin59 OX=2480215 GN=EA366_10275 PE=4 SV=1	26.1388	13286000
356	F.AHGTLF.A		323.171	2	645.335	645.336	-0.1	124	247.11	>tr|A0A6P2ATL3|A0A6P2ATL3_9CYAN Filamentous hemagglutinin N-terminal domain-containing protein (Fragment) OS=Spirulina sp. DLM2.Bin59 OX=2480215 GN=EA366_08710 PE=4 SV=1	22.6588	13247000
357	K.AMLGLIPH.T		426.241	2	851.475	851.481	-6.7	50	139.3	>tr|A0A6P2AZ42|A0A6P2AZ42_9CYAN ATP-binding cassette domain-containing protein (Fragment) OS=Spirulina sp. DLM2.Bin59 OX=2480215 GN=EA366_00080 PE=4 SV=1	25.3057	13163000
358	F.TPLILRH.V		425.277	2	849.546	849.53	18.7	192	145.43	>tr|A0A6P2AVY5|A0A6P2AVY5_9CYAN O-linked N-acetylglucosamine transferase, SPINDLY family protein OS=Spirulina sp. DLM2.Bin59 OX=2480215 GN=EA366_06220 PE=4 SV=1	25.3057	13163000
359	L.PVLHLPQ.L		402.243	2	803.479	803.477	1.4	264	104.82	>tr|A0A6P2ASR6|A0A6P2ASR6_9CYAN Heterodisulfide reductase OS=Spirulina sp. DLM2.Bin59 OX=2480215 GN=EA366_09620 PE=4 SV=1	36.1596	13104000
360	M.QPQHQ.P		637.297	1	637.297	637.305	-13.2	2	111.54	>tr|A0A6P2AZN1|A0A6P2AZN1_9CYAN NUDIX hydrolase OS=Spirulina sp. DLM2.Bin59 OX=2480215 GN=EA366_01285 PE=4 SV=1	62.8823	13091000
361	H.FHPQG.T		585.281	1	585.281	585.278	5.1	221	119.86	>tr|A0A6P2AP66|A0A6P2AP66_9CYAN Sensor histidine kinase OS=Spirulina sp. DLM2.Bin59 OX=2480215 GN=EA366_12825 PE=4 SV=1	18.7163	13028000
362	R.PHQFPQ.S		377.183	2	753.358	753.368	-13.5	62	148.64	>tr|A0A6P2AVF1|A0A6P2AVF1_9CYAN ATP-binding protein (Fragment) OS=Spirulina sp. DLM2.Bin59 OX=2480215 GN=EA366_06615 PE=4 SV=1	20.6274	12725000
363	Q.TAGE.Y		377.183	1	377.183	377.167	41.8	1139	124.1	>tr|A0A6P2AWA4|A0A6P2AWA4_9CYAN Serine/threonine-protein kinase PknK (Fragment) OS=Spirulina sp. DLM2.Bin59 OX=2480215 GN=EA366_04690 PE=4 SV=1	20.6274	12725000
364	G.QSLPPF.S		688.369	1	688.369	688.366	3.2	390	150.14	>tr|A0A6P2ASP1|A0A6P2ASP1_9CYAN DUF4114 domain-containing protein (Fragment) OS=Spirulina sp. DLM2.Bin59 OX=2480215 GN=EA366_11560 PE=4 SV=1	46.2962	12704000
365	E.QTLAPQ.E		657.358	1	657.358	657.357	2.2	172	122.09	>tr|A0A6P2AV71|A0A6P2AV71_9CYAN DNA replication and repair protein RecF OS=Spirulina sp. DLM2.Bin59 OX=2480215 GN=recF PE=3 SV=1	19.4843	12701000
366	H.GASGVGKT.S		676.367	1	676.367	676.362	6.4	142	136.21	>tr|A0A6P2AXA4|A0A6P2AXA4_9CYAN NACHT domain-containing protein (Fragment) OS=Spirulina sp. DLM2.Bin59 OX=2480215 GN=EA366_03140 PE=4 SV=1	39.2646	12504000
367	D.VPTAYF.D		697.356	1	697.356	697.356	1	148	124.19	>tr|A0A6P2AMC0|A0A6P2AMC0_9CYAN Histidine kinase OS=Spirulina sp. DLM2.Bin59 OX=2480215 GN=EA366_13980 PE=4 SV=1	51.3726	12378000
368	A.AHFPS.T		558.26	1	558.26	558.267	-13.3	598	131.76	>tr|A0A6P2AYL1|A0A6P2AYL1_9CYAN Histidine kinase domain-containing protein OS=Spirulina sp. DLM2.Bin59 OX=2480215 GN=EA366_00710 PE=4 SV=1	41.924	12295000
369	R.NVVALFGP.L		408.733	2	816.458	816.461	-3.7	264	144.18	>tr|A0A6P2ARZ2|A0A6P2ARZ2_9CYAN Uncharacterized protein OS=Spirulina sp. DLM2.Bin59 OX=2480215 GN=EA366_11520 PE=4 SV=1	24.4158	12290000
370	G.IGIW.I		488.288	1	488.288	488.287	2.2	121	202.32	>tr|A0A6P2AV11|A0A6P2AV11_9CYAN DUF1565 domain-containing protein OS=Spirulina sp. DLM2.Bin59 OX=2480215 GN=EA366_06250 PE=4 SV=1	56.0253	12227000
371	R.QPQRGLYFIGP.D		638.338	2	1275.67	1275.68	-12.8	120	100.06	>tr|A0A6P2AV21|A0A6P2AV21_9CYAN Aminopeptidase N OS=Spirulina sp. DLM2.Bin59 OX=2480215 GN=EA366_06185 PE=3 SV=1	23.7534	12208000
372	N.AGYRVTH.N		402.212	2	803.418	803.416	2.2	81	170.74	>tr|A0A6P2AS91|A0A6P2AS91_9CYAN Lipid II isoglutaminyl synthase (glutamine-hydrolyzing) subunit MurT OS=Spirulina sp. DLM2.Bin59 OX=2480215 GN=murT PE=3 SV=1	20.6092	12124000
373	R.TLDLPH.L		348.19	2	695.372	695.372	-0.4	105	158.39	>tr|A0A6P2ALG7|A0A6P2ALG7_9CYAN 2-amino-4-hydroxy-6-hydroxymethyldihydropteridine pyrophosphokinase OS=Spirulina sp. DLM2.Bin59 OX=2480215 GN=folK PE=4 SV=1	30.7203	12104000
374	S.SPDKGKH.Q		384.698	2	768.388	768.4	-15.6	249	169.78	>tr|A0A6P2AKU1|A0A6P2AKU1_9CYAN Type I site-specific deoxyribonuclease OS=Spirulina sp. DLM2.Bin59 OX=2480215 GN=EA366_14665 PE=3 SV=1	10.908	12050000
375	Y.QPFNPT.A		703.342	1	703.342	703.341	1.8	284	136.49	>tr|A0A6P2AN54|A0A6P2AN54_9CYAN CHAT domain-containing protein (Fragment) OS=Spirulina sp. DLM2.Bin59 OX=2480215 GN=EA366_13410 PE=3 SV=1	28.2907	11865000
376	S.TYL.C		396.214	1	396.214	396.213	4.1	114	174.99	>sp|P00454|FENR_SPISP Ferredoxin--NADP reductase OS=Spirulina sp. OX=1157 GN=petH PE=1 SV=1	29.1383	11854000
377	M.TYAVIAPG.R		396.226	2	791.444	791.43	18.6	142	158.23	>tr|A0A6P2AKL0|A0A6P2AKL0_9CYAN Efflux RND transporter permease subunit OS=Spirulina sp. DLM2.Bin59 OX=2480215 GN=EA366_14490 PE=4 SV=1	29.1383	11854000
378	D.DYY.D		460.173	1	460.173	460.171	2.8	20	152.85	>tr|A0A6P2AZL2|A0A6P2AZL2_9CYAN Uncharacterized protein (Fragment) OS=Spirulina sp. DLM2.Bin59 OX=2480215 GN=EA366_01405 PE=3 SV=1	26.2583	11527000
379	A.VSGNLFHSFQQ.F		632.31	2	1263.61	1263.61	1.3	36	106.95	>tr|A0A6P2ATL3|A0A6P2ATL3_9CYAN Filamentous hemagglutinin N-terminal domain-containing protein (Fragment) OS=Spirulina sp. DLM2.Bin59 OX=2480215 GN=EA366_08710 PE=4 SV=1	23.2966	11460000
380	D.ATAQGAAFGA.G		864.409	1	864.409	864.421	-13.6	443	110.74	>tr|A0A6P2AXH0|A0A6P2AXH0_9CYAN Glycerol kinase OS=Spirulina sp. DLM2.Bin59 OX=2480215 GN=glpK PE=3 SV=1	26.6493	11377000
381	T.QQPLGGKAQQGG.Q		584.808	2	1168.61	1168.61	1.7	981	140.8	>tr|A0A6P2ASU0|A0A6P2ASU0_9CYAN DNA-directed RNA polymerase subunit beta OS=Spirulina sp. DLM2.Bin59 OX=2480215 GN=rpoB PE=3 SV=1	13.6442	11342000
382	N.PHP.D		350.171	1	350.171	350.182	-32.2	214	146.07	>tr|A0A6P2AV51|A0A6P2AV51_9CYAN DUF3536 domain-containing protein OS=Spirulina sp. DLM2.Bin59 OX=2480215 GN=EA366_09155 PE=4 SV=1	30.0026	11112000
383	A.LMGLE.A		562.289	1	562.289	562.29	-3.1	48	101.09	>tr|A0A6P2AYX2|A0A6P2AYX2_9CYAN Uncharacterized protein OS=Spirulina sp. DLM2.Bin59 OX=2480215 GN=EA366_03325 PE=4 SV=1	54.6885	11049000
384	L.GVSDRVIFAGF.V		584.312	2	1167.62	1167.62	0.7	253	141.2	>tr|A0A6P2AWS7|A0A6P2AWS7_9CYAN Glycosyltransferase family 1 protein OS=Spirulina sp. DLM2.Bin59 OX=2480215 GN=EA366_02585 PE=4 SV=1	17.2552	10960000
385	L.QLVPQ.Q		584.341	1	584.341	584.34	0.8	56	152.41	>tr|A0A6P2AYA0|A0A6P2AYA0_9CYAN Polysaccharide biosynthesis tyrosine autokinase OS=Spirulina sp. DLM2.Bin59 OX=2480215 GN=EA366_03105 PE=4 SV=1	17.2552	10960000
386	E.LLQ.A		373.245	1	373.245	373.245	0.1	92	165.97	>tr|A0A6P2AZJ7|A0A6P2AZJ7_9CYAN Phosphoenolpyruvate synthase OS=Spirulina sp. DLM2.Bin59 OX=2480215 GN=EA366_06245 PE=4 SV=1	18.4667	10938000
387	V.YLEKF.L		350.189	2	699.371	699.371	0	199	172.11	>tr|A0A6P2AQQ4|A0A6P2AQQ4_9CYAN Biotin carboxylase OS=Spirulina sp. DLM2.Bin59 OX=2480215 GN=accC PE=4 SV=1	30.232	10903000
388	T.QPGAGPTELETQ.V		614.307	2	1227.61	1227.59	16.9	53	148.35	>tr|A0A6P2AKL0|A0A6P2AKL0_9CYAN Efflux RND transporter permease subunit OS=Spirulina sp. DLM2.Bin59 OX=2480215 GN=EA366_14490 PE=4 SV=1	37.946	10872000
389	D.HVEKAHALC[+57.021]AFG.E	C[+57]	670.333	2	1339.66	1339.66	0.7	369	176.78	>tr|A0A6P2ATV7|A0A6P2ATV7_9CYAN NAD(P)/FAD-dependent oxidoreductase OS=Spirulina sp. DLM2.Bin59 OX=2480215 GN=EA366_08500 PE=4 SV=1	10.5099	10737000
390	E.TYLDSSF.E		416.696	2	832.385	832.372	15.2	146	120.37	>tr|A0A6P2AYU4|A0A6P2AYU4_9CYAN Chromophore lyase CpcT/CpeT OS=Spirulina sp. DLM2.Bin59 OX=2480215 GN=cpcT PE=3 SV=1	23.6558	10735000
391	R.LQQNWEAWLQAGH.I		790.882	2	1580.76	1580.76	-1.9	150	108.66	>tr|A0A6P2AK19|A0A6P2AK19_9CYAN GHL10 domain-containing protein (Fragment) OS=Spirulina sp. DLM2.Bin59 OX=2480215 GN=EA366_14110 PE=3 SV=1	18.3413	10645000
392	A.AATFPQHTL.R		493.261	2	985.515	985.51	4.8	27	180.06	>tr|A0A6P2AZL2|A0A6P2AZL2_9CYAN Uncharacterized protein (Fragment) OS=Spirulina sp. DLM2.Bin59 OX=2480215 GN=EA366_01405 PE=3 SV=1	32.7708	10611000
393	A.QGAIPAGLML.V		485.773	2	970.539	970.539	0.2	101	275.17	>tr|A0A6P2ANF2|A0A6P2ANF2_9CYAN Cytochrome b6-f complex subunit 4 OS=Spirulina sp. DLM2.Bin59 OX=2480215 GN=petD PE=3 SV=1	49.8373	10569000
394	L.QLWREKQ.W		494.274	2	987.541	987.537	4.1	177	120.8	>tr|A0A6P2AXM6|A0A6P2AXM6_9CYAN ABC transporter ATP-binding protein OS=Spirulina sp. DLM2.Bin59 OX=2480215 GN=EA366_02730 PE=4 SV=1	21.3183	10473000
395	Q.QQQALT.M		688.365	1	688.365	688.362	3.5	383	123.37	>tr|A0A6P2AXD8|A0A6P2AXD8_9CYAN Chromosome partition protein Smc OS=Spirulina sp. DLM2.Bin59 OX=2480215 GN=smc PE=3 SV=1	50.0589	10299000
396	G.ISPY.E		479.255	1	479.255	479.25	10	875	147.01	>tr|A0A6P2AXX2|A0A6P2AXX2_9CYAN P-type Ca(2+) transporter OS=Spirulina sp. DLM2.Bin59 OX=2480215 GN=EA366_03175 PE=4 SV=1	25.2122	10211000
397	E.LLPLR.R		306.216	2	611.424	611.424	0.2	680	241.03	>tr|A0A6P2AZJ7|A0A6P2AZJ7_9CYAN Phosphoenolpyruvate synthase OS=Spirulina sp. DLM2.Bin59 OX=2480215 GN=EA366_06245 PE=4 SV=1	31.9751	10194000
398	L.LLQGDDVVL.H		486.273	2	971.539	971.541	-2.2	47	173.78	>tr|A0A6P2AI44|A0A6P2AI44_9CYAN Rpn family recombination-promoting nuclease/putative transposase OS=Spirulina sp. DLM2.Bin59 OX=2480215 GN=EA366_15240 PE=4 SV=1	35.9922	10126000
399	L.ITHKF.R		323.191	2	645.375	645.372	5	172	118.99	>tr|A0A6P2AI89|A0A6P2AI89_9CYAN ABC transporter ATP-binding protein OS=Spirulina sp. DLM2.Bin59 OX=2480215 GN=EA366_15075 PE=4 SV=1	21.6675	10114000
400	E.QYPI.A		520.279	1	520.279	520.277	4.8	148	105.47	>tr|A0A6P2AUS8|A0A6P2AUS8_9CYAN UPF0284 protein EA366_07800 OS=Spirulina sp. DLM2.Bin59 OX=2480215 GN=EA366_07800 PE=3 SV=1	33.9194	10102000
401	Y.GSFLPH.Q		329.171	2	657.335	657.336	-1.5	77	229.35	>tr|A0A6P2AUU8|A0A6P2AUU8_9CYAN Glycogen debranching enzyme GlgX OS=Spirulina sp. DLM2.Bin59 OX=2480215 GN=glgX PE=3 SV=1	17.1091	10036000
402	H.QQLPFQ.V		760.398	1	760.398	760.399	-1	108	190.68	>tr|A0A6P2AW75|A0A6P2AW75_9CYAN Aspartate--tRNA(Asp/Asn) ligase OS=Spirulina sp. DLM2.Bin59 OX=2480215 GN=aspS PE=3 SV=1	38.9974	10010000
403	M.QPQRFP.E		386.709	2	772.412	772.41	1.9	2	253.58	>tr|A0A6P2ARC7|A0A6P2ARC7_9CYAN Sigma-70 family RNA polymerase sigma factor OS=Spirulina sp. DLM2.Bin59 OX=2480215 GN=EA366_13070 PE=4 SV=1	23.1155	9985300
404	N.PQQQAVQAQG.D		527.769	2	1054.53	1054.53	3.5	145	137.95	>tr|A0A6P2ARB1|A0A6P2ARB1_9CYAN Uncharacterized protein OS=Spirulina sp. DLM2.Bin59 OX=2480215 GN=EA366_11885 PE=4 SV=1	14.171	9878300
405	T.PIPFNT.G		688.368	1	688.368	688.366	2.8	307	205.34	>tr|A0A6P2APR0|A0A6P2APR0_9CYAN SagB/ThcOx family dehydrogenase OS=Spirulina sp. DLM2.Bin59 OX=2480215 GN=EA366_12445 PE=4 SV=1	42.1724	9833000
406	D.QVNVPL.F		669.393	1	669.393	669.393	0.2	188	223.52	>tr|A0A6P2AY81|A0A6P2AY81_9CYAN Transport permease protein OS=Spirulina sp. DLM2.Bin59 OX=2480215 GN=EA366_03200 PE=3 SV=1	39.9918	9713500
407	V.LTPDFWSGQ.G		525.752	2	1050.5	1050.49	6.7	142	128.01	>tr|A0A6P2AV97|A0A6P2AV97_9CYAN Lipoyl synthase OS=Spirulina sp. DLM2.Bin59 OX=2480215 GN=lipA PE=3 SV=1	27.3285	9695700
408	S.PGNQPAKYRI.L		572.319	2	1143.63	1143.63	3.8	428	121.68	>tr|A0A6P2AYS8|A0A6P2AYS8_9CYAN Cation:proton antiporter OS=Spirulina sp. DLM2.Bin59 OX=2480215 GN=EA366_07200 PE=3 SV=1	28.0572	9648400
409	A.THFQP.A		629.307	1	629.307	629.304	4.4	242	154.67	>tr|A0A6P2AP94|A0A6P2AP94_9CYAN GAF domain-containing protein OS=Spirulina sp. DLM2.Bin59 OX=2480215 GN=EA366_13515 PE=4 SV=1	25.4404	9638300
410	T.DDTRIR.A		388.207	2	775.406	775.406	0.2	37	174.31	>tr|A0A6P2AWI8|A0A6P2AWI8_9CYAN Phosphoglycerate kinase OS=Spirulina sp. DLM2.Bin59 OX=2480215 GN=pgk PE=3 SV=1	11.0576	9627700
411	Q.LTFIGTW.C		419.232	2	837.457	837.451	7.3	227	191.93	>tr|A0A6P2AXL2|A0A6P2AXL2_9CYAN Glycosyltransferase OS=Spirulina sp. DLM2.Bin59 OX=2480215 GN=EA366_05680 PE=4 SV=1	42.2602	9590200
412	E.QFIPQ.L		632.339	1	632.339	632.34	-2.2	623	189.01	>tr|A0A6P2AVF5|A0A6P2AVF5_9CYAN ATP-dependent zinc metalloprotease FtsH OS=Spirulina sp. DLM2.Bin59 OX=2480215 GN=hflB PE=3 SV=1	40.6475	9573200
413	A.LVEGANQVRD.E		550.79	2	1100.57	1100.57	2.4	117	165.66	>tr|A0A6P2APC1|A0A6P2APC1_9CYAN Uncharacterized protein (Fragment) OS=Spirulina sp. DLM2.Bin59 OX=2480215 GN=EA366_12555 PE=4 SV=1	19.1404	9478600
414	R.QLPHKFTV.W		485.279	2	969.551	969.552	-0.2	62	208.14	>tr|A0A6P2AZL4|A0A6P2AZL4_9CYAN Uncharacterized protein OS=Spirulina sp. DLM2.Bin59 OX=2480215 GN=EA366_02045 PE=4 SV=1	21.4185	9425100
415	P.IAQRAWH.S		441.247	2	881.486	881.474	13.4	44	110.92	>tr|A0A6P2ARQ6|A0A6P2ARQ6_9CYAN Heavy metal translocating P-type ATPase (Fragment) OS=Spirulina sp. DLM2.Bin59 OX=2480215 GN=EA366_11365 PE=3 SV=1	18.8589	9415100
416	K.QEGEIVQQQ.C		529.759	2	1058.51	1058.51	-1.3	290	180.44	>tr|A0A6P2AQR4|A0A6P2AQR4_9CYAN Uncharacterized protein OS=Spirulina sp. DLM2.Bin59 OX=2480215 GN=EA366_13475 PE=4 SV=1	46.1856	9405000
417	D.YPT.P		380.182	1	380.182	380.182	0.9	66	152.41	>tr|A0A6P2AWA4|A0A6P2AWA4_9CYAN Serine/threonine-protein kinase PknK (Fragment) OS=Spirulina sp. DLM2.Bin59 OX=2480215 GN=EA366_04690 PE=4 SV=1	16.6687	9396500
418	Q.QPQWFPDVTLD.P		673.333	2	1345.66	1345.64	12	119	100.93	>tr|A0A6P2AS94|A0A6P2AS94_9CYAN EAL domain-containing protein (Fragment) OS=Spirulina sp. DLM2.Bin59 OX=2480215 GN=EA366_10275 PE=4 SV=1	51.1212	9325700
419	Y.PQFRAVV.P		408.74	2	816.472	816.473	-1.1	270	127.81	>tr|A0A6P2B2S4|A0A6P2B2S4_9CYAN Extracellular solute-binding protein OS=Spirulina sp. DLM2.Bin59 OX=2480215 GN=EA366_00755 PE=4 SV=1	28.0955	9185800
420	W.PRELKPW.P		925.516	1	925.516	925.525	-10.6	380	139.34	>tr|A0A6P2ASB7|A0A6P2ASB7_9CYAN 4Fe-4S binding protein (Fragment) OS=Spirulina sp. DLM2.Bin59 OX=2480215 GN=EA366_11310 PE=4 SV=1	43.125	9126800
421	P.QPFEPTTVY.D		541.264	2	1081.52	1081.52	0	771	144.54	>tr|A0A6P2AS54|A0A6P2AS54_9CYAN ATP-binding cassette domain-containing protein OS=Spirulina sp. DLM2.Bin59 OX=2480215 GN=EA366_11130 PE=4 SV=1	40.5175	9055500
422	P.QPQPELRSQ.L		541.787	2	1082.57	1082.56	6.9	186	117.61	>tr|A0A6P2AIP1|A0A6P2AIP1_9CYAN Glycosyltransferase family 4 protein OS=Spirulina sp. DLM2.Bin59 OX=2480215 GN=EA366_14745 PE=4 SV=1	40.5175	9055500
423	Y.LPIQPQQ.R		412.238	2	823.469	823.467	1.8	338	160.53	>tr|A0A6P2AYF9|A0A6P2AYF9_9CYAN DUF4255 domain-containing protein OS=Spirulina sp. DLM2.Bin59 OX=2480215 GN=EA366_02805 PE=4 SV=1	34.7929	8711600
424	Q.KC[+57.021]LTY.F	C[+57]	342.672	2	684.337	684.338	-1.7	112	125.78	>tr|A0A6P2B219|A0A6P2B219_9CYAN Type I restriction endonuclease subunit R (Fragment) OS=Spirulina sp. DLM2.Bin59 OX=2480215 GN=EA366_01730 PE=4 SV=1	14.547	8689100
425	Q.APQGPVGAPGAPGA.P		573.8	2	1146.59	1146.59	2.4	164	140.26	>tr|A0A6P2AZG8|A0A6P2AZG8_9CYAN Uncharacterized protein OS=Spirulina sp. DLM2.Bin59 OX=2480215 GN=EA366_03700 PE=4 SV=1	22.1193	8401400
426	Y.LVPPQ.G		553.336	1	553.336	553.334	2	516	155.02	>tr|A0A6P2AKU1|A0A6P2AKU1_9CYAN Type I site-specific deoxyribonuclease OS=Spirulina sp. DLM2.Bin59 OX=2480215 GN=EA366_14665 PE=3 SV=1	21.4031	8392000
427	N.QQLPYAPGI.V		493.772	2	986.536	986.531	5.1	95	151.4	>tr|Q6PQE8|Q6PQE8_9CYAN NiFe hydrogenase small subunit (Fragment) OS=Spirulina subsalsa OX=54311 GN=hoxY PE=4 SV=1	44.449	8382900
428	I.WQFPQ.G		705.336	1	705.336	705.336	0.6	193	204.78	>tr|A0A6P2AUC5|A0A6P2AUC5_9CYAN Geranylgeranyl reductase family protein (Fragment) OS=Spirulina sp. DLM2.Bin59 OX=2480215 GN=EA366_11315 PE=4 SV=1	47.7157	8369100
429	R.QPQLMGVDLP.M		549.276	2	1097.54	1097.57	-19.9	215	122.91	>tr|A0A6P2AXU2|A0A6P2AXU2_9CYAN CocE/NonD family hydrolase (Fragment) OS=Spirulina sp. DLM2.Bin59 OX=2480215 GN=EA366_02145 PE=4 SV=1	29.7911	8207000
430	G.LNY.G		409.209	1	409.209	409.208	1.1	307	115.75	>tr|A0A6P2ASB7|A0A6P2ASB7_9CYAN 4Fe-4S binding protein (Fragment) OS=Spirulina sp. DLM2.Bin59 OX=2480215 GN=EA366_11310 PE=4 SV=1	23.8526	8202800
431	L.VTFDVNP.P		396.199	2	791.391	791.393	-2.7	97	142.46	>tr|A0A6P2B2R6|A0A6P2B2R6_9CYAN ATP-binding protein (Fragment) OS=Spirulina sp. DLM2.Bin59 OX=2480215 GN=EA366_00780 PE=4 SV=1	20.0522	8141400
432	E.GSVLGLFGG.A		806.44	1	806.44	806.441	-0.7	488	132.73	>tr|A0A6P2AK06|A0A6P2AK06_9CYAN S-layer protein OS=Spirulina sp. DLM2.Bin59 OX=2480215 GN=EA366_14130 PE=3 SV=1	53.3234	8131000
433	T.TLSSETLR.H		453.749	2	906.492	906.489	2.7	361	166.36	>tr|A0A6P2AUL0|A0A6P2AUL0_9CYAN 4Fe-4S binding protein OS=Spirulina sp. DLM2.Bin59 OX=2480215 GN=EA366_06870 PE=4 SV=1	14.7371	8129400
434	L.PVFIYPL.G		424.754	2	848.501	848.492	11	10	129.47	>tr|A0A6P2AU55|A0A6P2AU55_9CYAN YdcF family protein OS=Spirulina sp. DLM2.Bin59 OX=2480215 GN=EA366_07095 PE=4 SV=1	35.2213	8126100
435	R.PQQMSLGPL.E		485.756	2	970.504	970.503	1.9	7	149.71	>tr|A0A6P2ATF7|A0A6P2ATF7_9CYAN CopY family transcriptional regulator OS=Spirulina sp. DLM2.Bin59 OX=2480215 GN=EA366_08050 PE=3 SV=1	33.5555	8039700
436	G.ITLSDDSAPLV.A		565.802	2	1130.6	1130.59	2.5	189	181.59	>tr|A0A6P2AV11|A0A6P2AV11_9CYAN DUF1565 domain-containing protein OS=Spirulina sp. DLM2.Bin59 OX=2480215 GN=EA366_06250 PE=4 SV=1	49.9168	8020000
437	G.ITLSDDSAPLV.A		565.802	2	1130.6	1130.59	3.2	189	178.45	>tr|A0A6P2AV11|A0A6P2AV11_9CYAN DUF1565 domain-containing protein OS=Spirulina sp. DLM2.Bin59 OX=2480215 GN=EA366_06250 PE=4 SV=1	50.4252	8020000
438	A.AFTAVLTK.N		425.756	2	850.505	850.503	2.3	676	139.97	>tr|A0A6P2AM50|A0A6P2AM50_9CYAN HAMP domain-containing protein OS=Spirulina sp. DLM2.Bin59 OX=2480215 GN=EA366_12590 PE=4 SV=1	28.1308	7976200
439	G.QITALDLPA.L		941.531	1	941.531	941.53	1.2	224	100.86	>tr|A0A6P2ATL3|A0A6P2ATL3_9CYAN Filamentous hemagglutinin N-terminal domain-containing protein (Fragment) OS=Spirulina sp. DLM2.Bin59 OX=2480215 GN=EA366_08710 PE=4 SV=1	50.3047	7876700
440	Y.LVGKIAEH.A		433.76	2	866.513	866.509	3.5	126	121.61	>tr|B9A0R5|B9A0R5_9CYAN 60 kDa chaperonin (Fragment) OS=Spirulina subsalsa OX=54311 GN=groEL PE=3 SV=1	16.9263	7873400
441	A.HSLASRRTH.P		532.793	2	1064.58	1064.57	8.1	128	158.09	>tr|A0A6P2AUZ3|A0A6P2AUZ3_9CYAN Glycosyltransferase family 1 protein OS=Spirulina sp. DLM2.Bin59 OX=2480215 GN=EA366_06005 PE=4 SV=1	25.4984	7863200
442	A.IKKISL.E		351.251	2	701.494	701.492	3	436	185.19	>tr|A0A6P2AMX9|A0A6P2AMX9_9CYAN 5-oxoprolinase (Fragment) OS=Spirulina sp. DLM2.Bin59 OX=2480215 GN=EA366_13440 PE=3 SV=1	52.263	7827500
443	D.LFP.Y		376.223	1	376.223	376.223	0.9	99	169.25	>tr|A0A6P2AZJ7|A0A6P2AZJ7_9CYAN Phosphoenolpyruvate synthase OS=Spirulina sp. DLM2.Bin59 OX=2480215 GN=EA366_06245 PE=4 SV=1	33.1026	7728900
444	A.PYP.Q		376.199	1	376.199	376.187	33.7	572	130.08	>tr|A0A6P2AXM7|A0A6P2AXM7_9CYAN Alpha-mannosidase (Fragment) OS=Spirulina sp. DLM2.Bin59 OX=2480215 GN=EA366_01625 PE=3 SV=1	33.1026	7728900
445	C.PPGTVL.Y		583.346	1	583.346	583.345	2.5	509	121.96	>tr|A0A6P2AWM4|A0A6P2AWM4_9CYAN DEAD/DEAH box helicase (Fragment) OS=Spirulina sp. DLM2.Bin59 OX=2480215 GN=EA366_06365 PE=4 SV=1	57.2721	7662400
446	R.PIPSGAISIAQ.V		527.296	2	1053.58	1053.59	-9.5	104	135.18	>tr|A0A6P2AKY3|A0A6P2AKY3_9CYAN Chlorophyll synthase ChlG OS=Spirulina sp. DLM2.Bin59 OX=2480215 GN=chlG PE=4 SV=1	20.272	7641300
447	E.QAGVQVSFY.G		499.759	2	998.511	998.494	16.5	394	180.21	>tr|A0A6P2AIW5|A0A6P2AIW5_9CYAN Photosystem II CP47 reaction center protein OS=Spirulina sp. DLM2.Bin59 OX=2480215 GN=psbB PE=3 SV=1	29.5074	7635400
448	T.QIVKI.I		600.409	1	600.409	600.408	2.3	144	144.16	>tr|A0A6P2AUS6|A0A6P2AUS6_9CYAN NCS2 family permease OS=Spirulina sp. DLM2.Bin59 OX=2480215 GN=EA366_11060 PE=3 SV=1	33.983	7614000
449	R.QLIPQ.A		598.358	1	598.358	598.356	3.8	301	232.06	>tr|A0A6P2AUZ2|A0A6P2AUZ2_9CYAN Aldo/keto reductase OS=Spirulina sp. DLM2.Bin59 OX=2480215 GN=EA366_07305 PE=4 SV=1	33.983	7614000
450	C.LQVC[+57.021]PVEGAIL.P	C[+57]	599.833	2	1198.66	1198.65	7.6	53	136.56	>tr|A0A6P2AJ82|A0A6P2AJ82_9CYAN Ferredoxin family protein OS=Spirulina sp. DLM2.Bin59 OX=2480215 GN=EA366_15805 PE=4 SV=1	33.983	7614000
451	V.QQLLGDNQVRAV.A		670.871	2	1340.74	1340.73	5.5	56	162.24	>tr|A0A6P2AIY6|A0A6P2AIY6_9CYAN ATP synthase subunit beta OS=Spirulina sp. DLM2.Bin59 OX=2480215 GN=atpD PE=3 SV=1	47.4897	7481700
452	D.QPQIFQ.R		760.396	1	760.396	760.399	-3.1	57	127.3	>tr|A0A6P2AP43|A0A6P2AP43_9CYAN ATP-binding protein (Fragment) OS=Spirulina sp. DLM2.Bin59 OX=2480215 GN=EA366_14440 PE=4 SV=1	38.3638	7448200
453	E.REQGIHAGDA.E		527.26	2	1053.51	1053.51	4.3	168	262.56	>tr|A0A6P2AY20|A0A6P2AY20_9CYAN Creatininase family protein OS=Spirulina sp. DLM2.Bin59 OX=2480215 GN=EA366_06455 PE=3 SV=1	16.6851	7415800
454	L.IAGAPV.V		527.322	1	527.322	527.319	5.1	129	115.75	>tr|A0A6P2AWQ5|A0A6P2AWQ5_9CYAN 1-deoxy-D-xylulose 5-phosphate reductoisomerase OS=Spirulina sp. DLM2.Bin59 OX=2480215 GN=dxr PE=3 SV=1	16.6851	7415800
455	S.LPYTRMEAQ.S		554.778	2	1108.55	1108.55	3.3	123	109.18	>tr|A0A6P2AY03|A0A6P2AY03_9CYAN TIGR03943 family protein OS=Spirulina sp. DLM2.Bin59 OX=2480215 GN=EA366_04935 PE=4 SV=1	49.8359	7317400
456	A.VYAF.R		499.25	1	499.25	499.255	-11.3	68	111.76	>tr|A0A6P2AVU8|A0A6P2AVU8_9CYAN Carotenoid biosynthesis protein OS=Spirulina sp. DLM2.Bin59 OX=2480215 GN=EA366_05550 PE=4 SV=1	63.6424	7279200
457	T.TVL.S		332.218	1	332.218	332.218	-0.9	124	151.78	>tr|A0A6P2AZJ7|A0A6P2AZJ7_9CYAN Phosphoenolpyruvate synthase OS=Spirulina sp. DLM2.Bin59 OX=2480215 GN=EA366_06245 PE=4 SV=1	32.1501	7269800
458	S.TGPY.S		437.203	1	437.203	437.203	0	973	124.53	>tr|A0A6P2ASU0|A0A6P2ASU0_9CYAN DNA-directed RNA polymerase subunit beta OS=Spirulina sp. DLM2.Bin59 OX=2480215 GN=rpoB PE=3 SV=1	17.4113	7212600
459	D.VSLHN.N		569.311	1	569.311	569.304	11.9	338	114.25	>tr|A0A6P2AQS2|A0A6P2AQS2_9CYAN Gfo/Idh/MocA family oxidoreductase OS=Spirulina sp. DLM2.Bin59 OX=2480215 GN=EA366_10660 PE=4 SV=1	50.9274	7162900
460	S.TPEAVGDYLAGPNH.T		480.896	3	1440.67	1440.68	-2.4	356	127.19	>tr|A0A6P2AV25|A0A6P2AV25_9CYAN Histidinol dehydrogenase OS=Spirulina sp. DLM2.Bin59 OX=2480215 GN=hisD PE=3 SV=1	13.3666	7034000
461	G.ATAFM[+15.995]LT.T	M[+16]	770.38	1	770.38	770.375	6.3	12	102.92	>tr|A0A6P2ATW4|A0A6P2ATW4_9CYAN PDZ domain-containing protein OS=Spirulina sp. DLM2.Bin59 OX=2480215 GN=EA366_07465 PE=3 SV=1	48.2325	7012000
462	R.TLPTHIQPS.D		497.274	2	993.541	993.536	4.2	243	180.88	>tr|A0A6P2APA3|A0A6P2APA3_9CYAN FtsQ-type POTRA domain-containing protein OS=Spirulina sp. DLM2.Bin59 OX=2480215 GN=EA366_12575 PE=4 SV=1	29.7884	6852300
463	D.LIPYWR.Q		424.245	2	847.484	847.482	1.6	149	138.87	>tr|A0A6P2AWB7|A0A6P2AWB7_9CYAN DUF3120 domain-containing protein OS=Spirulina sp. DLM2.Bin59 OX=2480215 GN=EA366_03450 PE=4 SV=1	31.2469	6830600
464	A.PLLVVE.V		669.419	1	669.419	669.418	0.9	104	100.04	>tr|A0A6P2AJ94|A0A6P2AJ94_9CYAN Uma2 family endonuclease OS=Spirulina sp. DLM2.Bin59 OX=2480215 GN=EA366_15940 PE=4 SV=1	49.0813	6823900
465	S.QQFAQLM.G		865.419	1	865.419	865.424	-5.2	729	145.4	>tr|A0A6P2AIS1|A0A6P2AIS1_9CYAN PAS domain S-box protein OS=Spirulina sp. DLM2.Bin59 OX=2480215 GN=EA366_15750 PE=4 SV=1	54.1595	6804200
466	G.LLPFQ.E		617.369	1	617.369	617.366	4.9	252	113.48	>tr|A0A6P2ALY0|A0A6P2ALY0_9CYAN NgoFVII family restriction endonuclease OS=Spirulina sp. DLM2.Bin59 OX=2480215 GN=EA366_13230 PE=4 SV=1	48.3578	6803400
467	C.NYP.E		393.178	1	393.178	393.177	1.7	350	172.93	>tr|A0A6P2AIU0|A0A6P2AIU0_9CYAN Circadian clock protein kinase KaiC OS=Spirulina sp. DLM2.Bin59 OX=2480215 GN=kaiC PE=3 SV=1	17.0358	6775100
468	F.LRLDQDPY.L		510.264	2	1019.52	1019.52	4.2	553	190.64	>tr|A0A6P2B0D4|A0A6P2B0D4_9CYAN UPF0182 family protein (Fragment) OS=Spirulina sp. DLM2.Bin59 OX=2480215 GN=EA366_02025 PE=4 SV=1	28.1168	6750800
469	A.PSLTRLP.D		392.236	2	783.465	783.472	-9.7	366	111.86	>tr|A0A6P2ALH3|A0A6P2ALH3_9CYAN Glutamate--tRNA ligase OS=Spirulina sp. DLM2.Bin59 OX=2480215 GN=gltX PE=3 SV=1	31.4652	6743000
470	E.QLIQFP.K		373.216	2	745.424	745.424	0.1	239	173.98	>tr|A0A6P2B061|A0A6P2B061_9CYAN Helicase (Fragment) OS=Spirulina sp. DLM2.Bin59 OX=2480215 GN=EA366_05180 PE=4 SV=1	52.7663	6724700
471	V.VIAQDNRDSI.L		565.797	2	1130.59	1130.58	5.7	109	149.68	>tr|A0A6P2AJ54|A0A6P2AJ54_9CYAN VCBS repeat-containing protein (Fragment) OS=Spirulina sp. DLM2.Bin59 OX=2480215 GN=EA366_14465 PE=4 SV=1	18.6511	6637800
472	D.LEDLEESIN.K		531.258	2	1061.51	1061.5	8.7	155	134.85	>tr|A0A6P2AV04|A0A6P2AV04_9CYAN Adenylyl-sulfate kinase OS=Spirulina sp. DLM2.Bin59 OX=2480215 GN=cysC PE=3 SV=1	17.3616	6614300
473	T.ILLLLII.P		405.808	2	810.609	810.606	3.2	272	270.01	>tr|A0A6P2AKY3|A0A6P2AKY3_9CYAN Chlorophyll synthase ChlG OS=Spirulina sp. DLM2.Bin59 OX=2480215 GN=chlG PE=4 SV=1	45.9145	6577000
474	R.LC[+57.021]L.T	C[+57]	405.215	1	405.215	405.217	-5.1	114	135.15	>tr|A0A6P2AXM7|A0A6P2AXM7_9CYAN Alpha-mannosidase (Fragment) OS=Spirulina sp. DLM2.Bin59 OX=2480215 GN=EA366_01625 PE=3 SV=1	45.9145	6577000
475	T.LGADPM.V		603.279	1	603.279	603.281	-2	74	113.49	>tr|A0A6P2AYE5|A0A6P2AYE5_9CYAN Orotate phosphoribosyltransferase OS=Spirulina sp. DLM2.Bin59 OX=2480215 GN=pyrE PE=3 SV=1	28.1518	6509000
476	D.LLM[+15.995].E	M[+16]	392.221	1	392.221	392.221	0.3	211	125.45	>tr|A0A6P2B061|A0A6P2B061_9CYAN Helicase (Fragment) OS=Spirulina sp. DLM2.Bin59 OX=2480215 GN=EA366_05180 PE=4 SV=1	16.7856	6473400
477	I.QVALQ.I		558.328	1	558.328	558.325	5.7	395	141.74	>tr|A0A6P2AZ82|A0A6P2AZ82_9CYAN Magnesium chelatase OS=Spirulina sp. DLM2.Bin59 OX=2480215 GN=EA366_04130 PE=3 SV=1	29.5102	6417900
478	R.IPQRLGYSP.Q		515.79	2	1030.57	1030.57	4.8	96	134.2	>tr|A0A6P2AUU7|A0A6P2AUU7_9CYAN Glycosyltransferase family 1 protein OS=Spirulina sp. DLM2.Bin59 OX=2480215 GN=EA366_07670 PE=4 SV=1	39.5306	6415500
479	L.TIQGSDGPVSS.G		524.247	2	1047.49	1047.5	-9	843	104.27	>tr|A0A6P2AZD2|A0A6P2AZD2_9CYAN Filamentous hemagglutinin N-terminal domain-containing protein (Fragment) OS=Spirulina sp. DLM2.Bin59 OX=2480215 GN=EA366_00310 PE=4 SV=1	11.3895	6272900
480	V.IIDYHLAGM[+15.995].D	M[+16]	524.763	2	1048.52	1048.51	6	1003	104.66	>tr|A0A6P2AS33|A0A6P2AS33_9CYAN PAS domain S-box protein OS=Spirulina sp. DLM2.Bin59 OX=2480215 GN=EA366_11435 PE=4 SV=1	49.4957	6226700
481	R.FAREAGV.S		375.201	2	749.394	749.394	0	770	131.57	>tr|A0A6P2AWY7|A0A6P2AWY7_9CYAN DNA polymerase I OS=Spirulina sp. DLM2.Bin59 OX=2480215 GN=polA PE=3 SV=1	21.0359	6217900
482	I.LDLQR.L		322.69	2	644.372	644.373	-1.2	1088	279.3	>tr|A0A6P2AVV2|A0A6P2AVV2_9CYAN PAS domain S-box protein OS=Spirulina sp. DLM2.Bin59 OX=2480215 GN=EA366_09255 PE=4 SV=1	23.7071	6210600
483	E.VAYIALH.F		393.727	2	786.447	786.451	-5.6	31	130.04	>tr|A0A6P2AQM5|A0A6P2AQM5_9CYAN Uncharacterized protein OS=Spirulina sp. DLM2.Bin59 OX=2480215 GN=EA366_11165 PE=4 SV=1	15.5556	6148100
484	R.LYC[+57.021]LGLR.T	C[+57]	447.745	2	894.483	894.487	-4.3	240	111.98	>tr|A0A6P2ASU7|A0A6P2ASU7_9CYAN Uncharacterized protein OS=Spirulina sp. DLM2.Bin59 OX=2480215 GN=EA366_10445 PE=4 SV=1	16.3565	6142500
485	E.TLYPQDFH.Y		510.749	2	1020.49	1020.48	11.3	184	174.06	>tr|A0A6P2AVL6|A0A6P2AVL6_9CYAN UDP-N-acetylenolpyruvoylglucosamine reductase OS=Spirulina sp. DLM2.Bin59 OX=2480215 GN=murB PE=3 SV=1	25.4105	6129000
486	N.QYILATH.S		423.226	2	845.444	845.452	-8.7	333	112.22	>tr|A0A6P2AWV2|A0A6P2AWV2_9CYAN Uncharacterized protein OS=Spirulina sp. DLM2.Bin59 OX=2480215 GN=EA366_06370 PE=4 SV=1	28.3459	6127200
487	N.TIF.D		380.218	1	380.218	380.218	-0.2	167	233.3	>tr|A0A6P2B061|A0A6P2B061_9CYAN Helicase (Fragment) OS=Spirulina sp. DLM2.Bin59 OX=2480215 GN=EA366_05180 PE=4 SV=1	40.7661	6124300
488	Q.TLAYFF.E		381.195	2	761.383	761.387	-4.7	169	184.76	>tr|A0A6P2AWS6|A0A6P2AWS6_9CYAN Uncharacterized protein OS=Spirulina sp. DLM2.Bin59 OX=2480215 GN=EA366_04110 PE=4 SV=1	40.7661	6124300
489	D.RVVPVQ.P		349.222	2	697.436	697.436	1	239	115.39	>tr|A0A6P2AX69|A0A6P2AX69_9CYAN dTDP-4-dehydrorhamnose reductase OS=Spirulina sp. DLM2.Bin59 OX=2480215 GN=rfbD PE=3 SV=1	21.8979	6101400
490	N.AVQDYQR.H		440.222	2	879.436	879.432	4.9	320	126.04	>tr|A0A6P2AL68|A0A6P2AL68_9CYAN Fumarate reductase iron-sulfur subunit OS=Spirulina sp. DLM2.Bin59 OX=2480215 GN=EA366_14150 PE=3 SV=1	16.2225	6052000
491	H.SHWLRS.S		393.203	2	785.398	785.405	-9.4	6	130.54	>tr|A0A6P2AW84|A0A6P2AW84_9CYAN Tetratricopeptide repeat protein OS=Spirulina sp. DLM2.Bin59 OX=2480215 GN=EA366_07330 PE=4 SV=1	14.2425	5838700
492	L.FIGF.L		483.262	1	483.262	483.26	3.8	98	180.95	>tr|A0A6P2APJ8|A0A6P2APJ8_9CYAN Permease OS=Spirulina sp. DLM2.Bin59 OX=2480215 GN=EA366_11350 PE=3 SV=1	53.5789	5837600
493	Q.GALF.A		407.229	1	407.229	407.229	-0.3	325	126.81	>tr|A0A6P2AR20|A0A6P2AR20_9CYAN Uncharacterized protein OS=Spirulina sp. DLM2.Bin59 OX=2480215 GN=EA366_10365 PE=4 SV=1	40.4168	5800700
494	S.AGIF.L		407.229	1	407.229	407.229	-0.3	165	126.81	>tr|A0A6P2AV11|A0A6P2AV11_9CYAN DUF1565 domain-containing protein OS=Spirulina sp. DLM2.Bin59 OX=2480215 GN=EA366_06250 PE=4 SV=1	40.4168	5800700
495	R.TFTQRY.N		408.213	2	815.418	815.405	16.8	289	104.47	>tr|A0A6P2ATR5|A0A6P2ATR5_9CYAN NACHT domain-containing protein OS=Spirulina sp. DLM2.Bin59 OX=2480215 GN=EA366_08660 PE=4 SV=1	40.4168	5800700
496	C.QPEPSPPQGL.T		525.269	2	1049.53	1049.53	3.7	54	105.49	>tr|A0A6P2AKQ0|A0A6P2AKQ0_9CYAN Thermonuclease family protein OS=Spirulina sp. DLM2.Bin59 OX=2480215 GN=EA366_14930 PE=4 SV=1	45.4326	5762400
497	A.KDQNQ.R		632.307	1	632.307	632.3	10.7	192	116.09	>tr|A0A6P2AV17|A0A6P2AV17_9CYAN ABC transporter ATP-binding protein (Fragment) OS=Spirulina sp. DLM2.Bin59 OX=2480215 GN=EA366_08625 PE=4 SV=1	18.511	5725300
498	H.VQPLQ.E		584.345	1	584.345	584.34	8.7	660	176.68	>tr|A0A6P2AK88|A0A6P2AK88_9CYAN Phosphoenolpyruvate carboxylase OS=Spirulina sp. DLM2.Bin59 OX=2480215 GN=ppc PE=3 SV=1	25.3254	5699100
499	I.LTAAQC[+57.021]FETQ.T	C[+57]	584.764	2	1168.52	1168.53	-8.8	52	103.72	>tr|A0A6P2AYF7|A0A6P2AYF7_9CYAN Peptidase S1 domain-containing protein OS=Spirulina sp. DLM2.Bin59 OX=2480215 GN=EA366_01345 PE=4 SV=1	25.3254	5699100
500	A.LTAAPL.L		585.375	1	585.375	585.361	25	338	111.32	>tr|A0A6P2AKI1|A0A6P2AKI1_9CYAN Uncharacterized protein OS=Spirulina sp. DLM2.Bin59 OX=2480215 GN=EA366_15735 PE=4 SV=1	25.3254	5699100
501	K.VVFSKAKNH.T		515.293	2	1029.58	1029.58	-5.5	70	131.63	>tr|A0A6P2AQT7|A0A6P2AQT7_9CYAN Type II toxin-antitoxin system HigB family toxin OS=Spirulina sp. DLM2.Bin59 OX=2480215 GN=EA366_10600 PE=4 SV=1	25.5773	5690700
502	Q.GQIFW.R		650.331	1	650.331	650.33	1.8	16	143.79	>tr|A0A6P2AVM5|A0A6P2AVM5_9CYAN Alpha/beta hydrolase OS=Spirulina sp. DLM2.Bin59 OX=2480215 GN=EA366_06010 PE=4 SV=1	60.3518	5680300
503	D.YLFPY.P		702.349	1	702.349	702.35	-0.5	154	177.36	>tr|A0A6P2AX60|A0A6P2AX60_9CYAN Glycosyltransferase OS=Spirulina sp. DLM2.Bin59 OX=2480215 GN=EA366_07710 PE=4 SV=1	55.6825	5655600
504	N.PDATHPL.E		375.698	2	750.389	750.378	14.1	623	106.93	>tr|A0A6P2AY08|A0A6P2AY08_9CYAN Bile acid beta-glucosidase (Fragment) OS=Spirulina sp. DLM2.Bin59 OX=2480215 GN=EA366_00895 PE=4 SV=1	14.5563	5646200
505	A.DFIVR.D		325.187	2	649.367	649.367	-0.2	443	103.06	>tr|A0A6P2AU89|A0A6P2AU89_9CYAN GMP synthase [glutamine-hydrolyzing] OS=Spirulina sp. DLM2.Bin59 OX=2480215 GN=guaA PE=3 SV=1	41.1523	5416700
506	D.LLY.I		408.25	1	408.25	408.249	2.8	560	167.81	>tr|A0A6P2B061|A0A6P2B061_9CYAN Helicase (Fragment) OS=Spirulina sp. DLM2.Bin59 OX=2480215 GN=EA366_05180 PE=4 SV=1	31.1647	5365600
507	L.LTSVATHGHA.P		497.264	2	993.52	993.511	9	582	172.09	>tr|A0A6P2AK89|A0A6P2AK89_9CYAN Isoleucine--tRNA ligase OS=Spirulina sp. DLM2.Bin59 OX=2480215 GN=ileS PE=3 SV=1	31.1081	5342900
508	E.LHPPYDRPGRE.L		668.838	2	1336.67	1336.68	-4.6	89	166.69	>tr|A0A6P2ALE3|A0A6P2ALE3_9CYAN FAD-dependent oxidoreductase (Fragment) OS=Spirulina sp. DLM2.Bin59 OX=2480215 GN=EA366_14020 PE=4 SV=1	9.7066	5318400
509	E.IQPRM[+15.995]L.K	M[+16]	387.221	2	773.434	773.434	0.6	121	187.37	>tr|A0A6P2AT82|A0A6P2AT82_9CYAN RAMP superfamily protein OS=Spirulina sp. DLM2.Bin59 OX=2480215 GN=EA366_09520 PE=4 SV=1	26.0032	5274600
510	D.IEQIVLQ.I		421.759	2	842.511	842.498	15.8	802	196.96	>tr|A0A6P2AUW7|A0A6P2AUW7_9CYAN Methyl-accepting chemotaxis protein OS=Spirulina sp. DLM2.Bin59 OX=2480215 GN=EA366_07600 PE=4 SV=1	33.8482	5252300
511	I.AGLWFERY.V		521.262	2	1041.52	1041.52	1.2	440	106.7	>tr|A0A6P2AYW8|A0A6P2AYW8_9CYAN DUF2157 domain-containing protein OS=Spirulina sp. DLM2.Bin59 OX=2480215 GN=EA366_02610 PE=4 SV=1	31.9208	5206400
512	W.LMLPR.P		315.194	2	629.38	629.38	0.2	402	104.75	>tr|A0A6P2AUK6|A0A6P2AUK6_9CYAN Uncharacterized protein (Fragment) OS=Spirulina sp. DLM2.Bin59 OX=2480215 GN=EA366_06580 PE=4 SV=1	29.3166	5191000
513	T.ILLLLI.I		349.265	2	697.523	697.522	1.4	272	172.79	>tr|A0A6P2AKY3|A0A6P2AKY3_9CYAN Chlorophyll synthase ChlG OS=Spirulina sp. DLM2.Bin59 OX=2480215 GN=chlG PE=4 SV=1	42.3582	5175000
514	W.IYVPI.V		604.374	1	604.374	604.37	6	183	184.94	>tr|A0A6P2AM16|A0A6P2AM16_9CYAN Uncharacterized protein OS=Spirulina sp. DLM2.Bin59 OX=2480215 GN=EA366_14085 PE=4 SV=1	51.5452	5128600
515	E.FIQ.M		407.23	1	407.23	407.229	2	836	129.2	>tr|A0A6P2B061|A0A6P2B061_9CYAN Helicase (Fragment) OS=Spirulina sp. DLM2.Bin59 OX=2480215 GN=EA366_05180 PE=4 SV=1	24.1361	5099800
516	K.LFHC[+57.021]LQ.K	C[+57]	409.209	2	817.411	817.403	10	108	102.11	>tr|A0A6P2AQB5|A0A6P2AQB5_9CYAN Response regulator OS=Spirulina sp. DLM2.Bin59 OX=2480215 GN=EA366_12860 PE=4 SV=1	24.1361	5099800
517	K.AVVPF.R		532.315	1	532.315	532.313	4.2	169	158.57	>tr|A0A6P2AKE4|A0A6P2AKE4_9CYAN Anthranilate phosphoribosyltransferase OS=Spirulina sp. DLM2.Bin59 OX=2480215 GN=trpD PE=3 SV=1	53.3958	5015700
518	A.FQQPH.Y		328.661	2	656.314	656.315	-1.5	28	153.28	>tr|A0A6P2AV88|A0A6P2AV88_9CYAN Alpha-D-glucose phosphate-specific phosphoglucomutase OS=Spirulina sp. DLM2.Bin59 OX=2480215 GN=EA366_06855 PE=3 SV=1	14.4241	4965000
519	A.EYF.F		458.194	1	458.194	458.192	4.9	718	125.42	>tr|A0A6P2AMP9|A0A6P2AMP9_9CYAN Tetratricopeptide repeat protein OS=Spirulina sp. DLM2.Bin59 OX=2480215 GN=EA366_13720 PE=4 SV=1	35.8248	4963400
520	S.LLLGTISLVGV.A		542.842	2	1084.68	1084.7	-19.4	6	101.66	>tr|A0A6P2AX39|A0A6P2AX39_9CYAN Uncharacterized protein OS=Spirulina sp. DLM2.Bin59 OX=2480215 GN=EA366_03525 PE=4 SV=1	56.4227	4931100
521	L.IPFYLLI.N		439.779	2	878.551	878.539	13.5	137	100.39	>tr|A0A6P2AJS4|A0A6P2AJS4_9CYAN NADH-quinone oxidoreductase subunit M OS=Spirulina sp. DLM2.Bin59 OX=2480215 GN=EA366_14425 PE=3 SV=1	46.3158	4875100
522	E.LITTPIPS.N		841.503	1	841.503	841.503	0.3	503	123.45	>tr|A0A6P2AUK6|A0A6P2AUK6_9CYAN Uncharacterized protein (Fragment) OS=Spirulina sp. DLM2.Bin59 OX=2480215 GN=EA366_06580 PE=4 SV=1	46.833	4874600
523	Y.QLGFWTRS.Q		497.759	2	994.511	994.51	1	239	128.18	>tr|A0A6P2AUU3|A0A6P2AUU3_9CYAN Uncharacterized protein (Fragment) OS=Spirulina sp. DLM2.Bin59 OX=2480215 GN=EA366_10035 PE=4 SV=1	23.0516	4872700
524	L.SLGQRGLS.F		409.231	2	817.454	817.453	1.8	575	213.3	>tr|A0A6P2AUM2|A0A6P2AUM2_9CYAN Peptidase domain-containing ABC transporter OS=Spirulina sp. DLM2.Bin59 OX=2480215 GN=EA366_07400 PE=4 SV=1	14.1921	4845800
525	Y.WDVF.A		566.262	1	566.262	566.261	1.6	567	109.63	>tr|A0A6P2AV20|A0A6P2AV20_9CYAN PAS domain S-box protein OS=Spirulina sp. DLM2.Bin59 OX=2480215 GN=EA366_05830 PE=4 SV=1	55.693	4712900
526	M.GALMPLAGHAQ.I		533.274	2	1065.54	1065.55	-8.8	13	103.44	>tr|A0A6P2B1Z9|A0A6P2B1Z9_9CYAN WD40 repeat domain-containing protein OS=Spirulina sp. DLM2.Bin59 OX=2480215 GN=EA366_01860 PE=4 SV=1	53.1639	4575300
527	T.LVC[+57.021]PGIRPA.W	C[+57]	491.78	2	982.552	982.55	1.7	173	110.51	>tr|A0A6P2AR77|A0A6P2AR77_9CYAN Orotidine 5'-phosphate decarboxylase OS=Spirulina sp. DLM2.Bin59 OX=2480215 GN=pyrF PE=3 SV=1	34.6489	4508600
528	L.QQPFQPF.P		891.436	1	891.436	891.436	-0.2	264	111.8	>tr|A0A6P2AHT1|A0A6P2AHT1_9CYAN Type II/IV secretion system protein OS=Spirulina sp. DLM2.Bin59 OX=2480215 GN=EA366_15460 PE=3 SV=1	44.4857	4454700
529	G.VALHKGEVQ.G		490.781	2	980.555	980.552	2.9	72	161.88	>tr|A0A6P2B1W9|A0A6P2B1W9_9CYAN Aromatic ring-hydroxylating dioxygenase subunit alpha OS=Spirulina sp. DLM2.Bin59 OX=2480215 GN=EA366_02015 PE=4 SV=1	18.813	4441600
530	A.IASTVVYAPP.Q		509.285	2	1017.56	1017.56	1.7	35	265.13	>tr|A0A6P2AXU2|A0A6P2AXU2_9CYAN CocE/NonD family hydrolase (Fragment) OS=Spirulina sp. DLM2.Bin59 OX=2480215 GN=EA366_02145 PE=4 SV=1	17.6298	4392100
531	E.QLAQQFPELR.A		615.34	2	1229.67	1229.66	6.6	66	144.17	>tr|A0A6P2AT90|A0A6P2AT90_9CYAN Primosomal protein N (Fragment) OS=Spirulina sp. DLM2.Bin59 OX=2480215 GN=priA PE=4 SV=1	41.8381	4230900
532	T.PFLDHF.I		775.375	1	775.375	775.377	-2.6	7	142.41	>tr|A0A6P2AQJ0|A0A6P2AQJ0_9CYAN Uncharacterized protein OS=Spirulina sp. DLM2.Bin59 OX=2480215 GN=EA366_11990 PE=4 SV=1	53.9372	4222100
533	Q.TLAYFF.E		381.195	2	761.384	761.387	-4.4	169	119.66	>tr|A0A6P2AWS6|A0A6P2AWS6_9CYAN Uncharacterized protein OS=Spirulina sp. DLM2.Bin59 OX=2480215 GN=EA366_04110 PE=4 SV=1	40.9174	4220700
534	Q.FPHRP.L		327.179	2	653.351	653.352	-0.5	125	175.08	>tr|A0A6P2AYT9|A0A6P2AYT9_9CYAN EAL domain-containing protein (Fragment) OS=Spirulina sp. DLM2.Bin59 OX=2480215 GN=EA366_02085 PE=4 SV=1	16.5667	4205000
535	A.LQWQLAL.L		436.255	2	871.503	871.504	-1.3	170	189.91	>tr|A0A6P2ATA0|A0A6P2ATA0_9CYAN ABC transporter ATP-binding protein OS=Spirulina sp. DLM2.Bin59 OX=2480215 GN=EA366_09445 PE=4 SV=1	37.5194	4187300
536	F.QPFQPQQP.P		969.488	1	969.488	969.479	9.5	57	220.12	>tr|A0A6P2APA7|A0A6P2APA7_9CYAN Glycosyltransferase OS=Spirulina sp. DLM2.Bin59 OX=2480215 GN=EA366_11530 PE=4 SV=1	41.1673	4177800
537	V.TAEPMK.D		338.67	2	676.333	676.333	-1.2	225	140.31	>tr|A0A6P2AHQ4|A0A6P2AHQ4_9CYAN DNA-directed RNA polymerase subunit beta' OS=Spirulina sp. DLM2.Bin59 OX=2480215 GN=rpoC2 PE=3 SV=1	14.4063	4135400
538	R.QPQLM[+15.995]GVDLP.M	M[+16]	557.282	2	1113.56	1113.56	-3.6	215	108.61	>tr|A0A6P2AXU2|A0A6P2AXU2_9CYAN CocE/NonD family hydrolase (Fragment) OS=Spirulina sp. DLM2.Bin59 OX=2480215 GN=EA366_02145 PE=4 SV=1	37.681	4103400
539	H.QILLL.T		599.413	1	599.413	599.413	1.3	174	104.16	>tr|A0A6P2B061|A0A6P2B061_9CYAN Helicase (Fragment) OS=Spirulina sp. DLM2.Bin59 OX=2480215 GN=EA366_05180 PE=4 SV=1	57.7327	4093400
540	A.TTLIRP.L		350.721	2	700.436	700.435	0.7	331	186.27	>tr|A0A6P2AVT4|A0A6P2AVT4_9CYAN 4Fe-4S ferredoxin OS=Spirulina sp. DLM2.Bin59 OX=2480215 GN=EA366_06050 PE=4 SV=1	27.2448	4015700
541	W.QPQGGAFPA.L		436.716	2	872.425	872.426	-1	16	111.29	>tr|A0A6P2ASH1|A0A6P2ASH1_9CYAN DUF1818 family protein OS=Spirulina sp. DLM2.Bin59 OX=2480215 GN=EA366_11665 PE=4 SV=1	30.6958	4010100
542	R.PHQFP.Q		313.158	2	625.308	625.309	-1.4	62	135.4	>tr|A0A6P2AVF1|A0A6P2AVF1_9CYAN ATP-binding protein (Fragment) OS=Spirulina sp. DLM2.Bin59 OX=2480215 GN=EA366_06615 PE=4 SV=1	20.0294	3958400
543	L.TFSTDG.G		314.142	2	627.277	627.262	23.1	38	106.88	>tr|A0A6P2AJ52|A0A6P2AJ52_9CYAN AMIN domain-containing protein (Fragment) OS=Spirulina sp. DLM2.Bin59 OX=2480215 GN=EA366_14980 PE=4 SV=1	20.0294	3958400
544	E.LPVP.Q		425.277	1	425.277	425.276	3	689	171.83	>tr|A0A6P2AV51|A0A6P2AV51_9CYAN DUF3536 domain-containing protein OS=Spirulina sp. DLM2.Bin59 OX=2480215 GN=EA366_09155 PE=4 SV=1	35.0361	3936900
545	I.FAIH.F		487.269	1	487.269	487.266	5.6	334	151.65	>tr|A0A6P2AWC5|A0A6P2AWC5_9CYAN CBS domain-containing protein OS=Spirulina sp. DLM2.Bin59 OX=2480215 GN=EA366_03430 PE=4 SV=1	23.4059	3932400
546	A.QQTSPQPGM.P		487.224	2	973.441	973.441	0.6	33	140.91	>tr|A0A6P2AGT4|A0A6P2AGT4_9CYAN DUF4168 domain-containing protein OS=Spirulina sp. DLM2.Bin59 OX=2480215 GN=EA366_16200 PE=4 SV=1	26.4167	3930000
547	K.IFQPH.F		321.173	2	641.34	641.341	-1.4	260	207.81	>tr|A0A6P2AJ63|A0A6P2AJ63_9CYAN Long-chain fatty acid--CoA ligase OS=Spirulina sp. DLM2.Bin59 OX=2480215 GN=EA366_14405 PE=4 SV=1	33.379	3928800
548	G.TVAPDTLQ.L		422.721	2	844.436	844.441	-6.6	94	107.03	>tr|A0A6P2APZ6|A0A6P2APZ6_9CYAN Uncharacterized protein OS=Spirulina sp. DLM2.Bin59 OX=2480215 GN=EA366_11890 PE=4 SV=1	30.7998	3917800
549	W.LFGFT.M		584.309	1	584.309	584.308	1.9	61	188.71	>tr|A0A6P2AYT7|A0A6P2AYT7_9CYAN Uncharacterized protein OS=Spirulina sp. DLM2.Bin59 OX=2480215 GN=EA366_00650 PE=4 SV=1	58.2031	3900800
550	T.TALIL.L		530.356	1	530.356	530.355	3.1	485	208.99	>tr|A0A6P2AY04|A0A6P2AY04_9CYAN Helicase (Fragment) OS=Spirulina sp. DLM2.Bin59 OX=2480215 GN=EA366_03670 PE=4 SV=1	47.1975	3862600
551	V.ERGDVVKTI.Q		508.793	2	1016.58	1016.57	4.6	50	193.41	>tr|A0A6P2AI71|A0A6P2AI71_9CYAN HlyD family efflux transporter periplasmic adaptor subunit OS=Spirulina sp. DLM2.Bin59 OX=2480215 GN=EA366_15145 PE=4 SV=1	20.612	3811000
552	E.YVLPIR.Y		380.739	2	760.471	760.472	-0.2	87	182.8	>tr|A0A6P2ASG8|A0A6P2ASG8_9CYAN BMC domain-containing protein OS=Spirulina sp. DLM2.Bin59 OX=2480215 GN=EA366_09330 PE=3 SV=1	39.164	3787400
553	G.TIPAWYPQ.D		488.256	2	975.504	975.493	11.2	477	137.26	>tr|A0A6P2AYA0|A0A6P2AYA0_9CYAN Polysaccharide biosynthesis tyrosine autokinase OS=Spirulina sp. DLM2.Bin59 OX=2480215 GN=EA366_03105 PE=4 SV=1	15.7601	3783100
554	S.TVAQWTA.A		388.707	2	776.406	776.394	16	174	102.45	>tr|A0A6P2ANM6|A0A6P2ANM6_9CYAN Sua5/YciO/YrdC/YwlC family protein OS=Spirulina sp. DLM2.Bin59 OX=2480215 GN=EA366_13165 PE=4 SV=1	20.9659	3719400
555	G.LTPC[+57.021]PS.A	C[+57]	337.662	2	674.317	674.318	-0.6	157	108.52	>tr|A0A6P2AUQ4|A0A6P2AUQ4_9CYAN High frequency lysogenization protein HflD OS=Spirulina sp. DLM2.Bin59 OX=2480215 GN=EA366_08870 PE=4 SV=1	14.8739	3664300
556	H.DRDVVRTM.A		496.253	2	991.5	991.499	0.8	520	187.89	>tr|A0A6P2AVR9|A0A6P2AVR9_9CYAN Formate C-acetyltransferase OS=Spirulina sp. DLM2.Bin59 OX=2480215 GN=pflB PE=3 SV=1	22.1618	3621800
557	Y.LKFPY.Y		334.194	2	667.381	667.381	-0.5	274	100.07	>tr|A0A6P2AVS9|A0A6P2AVS9_9CYAN Ni/Fe hydrogenase subunit alpha OS=Spirulina sp. DLM2.Bin59 OX=2480215 GN=EA366_05620 PE=3 SV=1	41.7987	3607800
558	Y.YFLRG.W		328.182	2	655.357	655.356	0.6	332	184.72	>tr|A0A6P2AZT4|A0A6P2AZT4_9CYAN YdcF family protein OS=Spirulina sp. DLM2.Bin59 OX=2480215 GN=EA366_03020 PE=4 SV=1	28.9746	3606200
559	N.GAKHYVPE.Q		450.739	2	900.47	900.457	14.3	467	144.1	>tr|A0A6P2AV84|A0A6P2AV84_9CYAN GAF domain-containing protein OS=Spirulina sp. DLM2.Bin59 OX=2480215 GN=EA366_08120 PE=4 SV=1	18.4404	3481000
560	E.QPGAFFGMPY.Q		557.753	2	1114.5	1114.5	-4.2	190	176.31	>tr|A0A6P2AVU8|A0A6P2AVU8_9CYAN Carotenoid biosynthesis protein OS=Spirulina sp. DLM2.Bin59 OX=2480215 GN=EA366_05550 PE=4 SV=1	35.7373	3399600
561	A.ATAQLQRYY.Q		557.292	2	1113.58	1113.57	7.7	141	113.85	>tr|A0A6P2ARQ4|A0A6P2ARQ4_9CYAN Glycosyltransferase (Fragment) OS=Spirulina sp. DLM2.Bin59 OX=2480215 GN=EA366_11610 PE=4 SV=1	35.7373	3399600
562	T.APF.D		334.176	1	334.176	334.176	0.9	378	132.61	>tr|A0A6P2AMG7|A0A6P2AMG7_9CYAN Cytochrome c oxidase subunit 1 OS=Spirulina sp. DLM2.Bin59 OX=2480215 GN=ctaD PE=3 SV=1	27.6028	3328500
563	T.TVTAQSVT.L		403.714	2	806.42	806.425	-6.4	66	128.53	>tr|A0A6P2ASS8|A0A6P2ASS8_9CYAN SpoIID/LytB domain-containing protein OS=Spirulina sp. DLM2.Bin59 OX=2480215 GN=EA366_09065 PE=4 SV=1	18.6999	3246900
564	V.VVIQQH.P		362.211	2	723.415	723.415	-0.1	170	177.7	>tr|A0A6P2ASU7|A0A6P2ASU7_9CYAN Uncharacterized protein OS=Spirulina sp. DLM2.Bin59 OX=2480215 GN=EA366_10445 PE=4 SV=1	15.9021	3238300
565	L.APY.N		350.172	1	350.172	350.171	2.4	276	116.78	>tr|A0A6P2B061|A0A6P2B061_9CYAN Helicase (Fragment) OS=Spirulina sp. DLM2.Bin59 OX=2480215 GN=EA366_05180 PE=4 SV=1	27.2022	3206000
566	S.DLVKL.I		587.379	1	587.379	587.376	5.2	416	148.42	>tr|A0A6P2ANP1|A0A6P2ANP1_9CYAN DUF1802 family protein (Fragment) OS=Spirulina sp. DLM2.Bin59 OX=2480215 GN=EA366_11815 PE=4 SV=1	28.3076	3157600
567	W.FDIPPY.A		751.376	1	751.376	751.366	12.6	82	150.74	>tr|A0A6P2AVX6|A0A6P2AVX6_9CYAN DUF3464 family protein OS=Spirulina sp. DLM2.Bin59 OX=2480215 GN=EA366_06325 PE=4 SV=1	49.4802	3150600
568	A.LYPHP.G		313.668	2	626.329	626.33	-1.7	202	154.71	>tr|A0A6P2AJ95|A0A6P2AJ95_9CYAN Alpha-mannosidase (Fragment) OS=Spirulina sp. DLM2.Bin59 OX=2480215 GN=EA366_15420 PE=4 SV=1	17.9155	3134500
569	I.HGLKDR.W		363.205	2	725.403	725.405	-2.6	535	159.28	>tr|A0A6P2AWE9|A0A6P2AWE9_9CYAN Uncharacterized protein OS=Spirulina sp. DLM2.Bin59 OX=2480215 GN=EA366_03185 PE=4 SV=1	11.3704	3076100
570	A.KQGGVLK.R		365.235	2	729.462	729.462	0.4	136	118.73	>tr|A0A6P2ALK9|A0A6P2ALK9_9CYAN Riboflavin biosynthesis protein RibBA OS=Spirulina sp. DLM2.Bin59 OX=2480215 GN=ribA PE=3 SV=1	15.1554	3067600
571	D.VATVTLK.S		366.237	2	731.466	731.466	-0.1	401	113.62	>tr|A0A6P2AYG5|A0A6P2AYG5_9CYAN ABC transporter ATP-binding protein (Fragment) OS=Spirulina sp. DLM2.Bin59 OX=2480215 GN=EA366_02140 PE=4 SV=1	24.473	3021200
572	P.TWPLR.A		336.697	2	672.386	672.383	4.5	11	164.35	>tr|A0A6P2AW39|A0A6P2AW39_9CYAN Histidine kinase OS=Spirulina sp. DLM2.Bin59 OX=2480215 GN=EA366_08045 PE=4 SV=1	24.4552	3001700
573	G.ETFVIDLE.S		483.239	2	965.47	965.483	-13.2	411	121.31	>tr|A0A6P2AYH1|A0A6P2AYH1_9CYAN Uncharacterized protein OS=Spirulina sp. DLM2.Bin59 OX=2480215 GN=EA366_03320 PE=4 SV=1	22.8084	2896300
574	P.LPLEV.R		570.353	1	570.353	570.35	5.4	629	145.23	>tr|A0A6P2AJL0|A0A6P2AJL0_9CYAN Uncharacterized protein OS=Spirulina sp. DLM2.Bin59 OX=2480215 GN=EA366_15555 PE=4 SV=1	45.8412	2800700
575	L.WQC[+57.021]IAQNAQGIYH.F	C[+57]	794.87	2	1588.73	1588.73	0.4	199	135.01	>tr|A0A6P2AX69|A0A6P2AX69_9CYAN dTDP-4-dehydrorhamnose reductase OS=Spirulina sp. DLM2.Bin59 OX=2480215 GN=rfbD PE=3 SV=1	9.4875	2785300
576	S.QPQPSLHFP.L		525.768	2	1050.53	1050.54	-7.5	58	154.37	>tr|A0A6P2AKP5|A0A6P2AKP5_9CYAN NERD domain-containing protein OS=Spirulina sp. DLM2.Bin59 OX=2480215 GN=EA366_14950 PE=4 SV=1	46.719	2718500
577	K.TPSPFL.V		331.181	2	661.356	661.356	-0.1	231	106.49	>tr|A0A6P2AVY6|A0A6P2AVY6_9CYAN ATP-binding protein OS=Spirulina sp. DLM2.Bin59 OX=2480215 GN=EA366_08225 PE=4 SV=1	33.6338	2673200
578	R.QPQPSPQDIS.H		548.765	2	1096.52	1096.53	-4.6	75	106.97	>tr|A0A6P2AUC6|A0A6P2AUC6_9CYAN DUF4131 domain-containing protein OS=Spirulina sp. DLM2.Bin59 OX=2480215 GN=EA366_07985 PE=4 SV=1	21.5547	2584200
579	R.PHQFPQ.S		377.188	2	753.368	753.368	0.6	62	169.31	>tr|A0A6P2AVF1|A0A6P2AVF1_9CYAN ATP-binding protein (Fragment) OS=Spirulina sp. DLM2.Bin59 OX=2480215 GN=EA366_06615 PE=4 SV=1	20.5811	2524400
580	I.TVIDRV.R		351.711	2	702.414	702.414	-1	607	118.5	>tr|A0A6P2AXR5|A0A6P2AXR5_9CYAN ATP-binding cassette domain-containing protein OS=Spirulina sp. DLM2.Bin59 OX=2480215 GN=EA366_04635 PE=3 SV=1	26.0046	2472800
581	P.VTVSLR.A		337.713	2	674.419	674.42	-0.5	60	110.16	>tr|A0A6P2AJ91|A0A6P2AJ91_9CYAN Biopolymer transporter ExbD OS=Spirulina sp. DLM2.Bin59 OX=2480215 GN=EA366_14350 PE=3 SV=1	26.1173	2436000
582	N.HTLPT.S		568.31	1	568.31	568.309	2.6	369	244.39	>tr|A0A6P2AV25|A0A6P2AV25_9CYAN Histidinol dehydrogenase OS=Spirulina sp. DLM2.Bin59 OX=2480215 GN=hisD PE=3 SV=1	15.9007	2406500
583	L.LYQPH.T		329.172	2	657.336	657.336	0.7	60	157.76	>tr|A0A6P2AL79|A0A6P2AL79_9CYAN Heat-inducible transcription repressor HrcA OS=Spirulina sp. DLM2.Bin59 OX=2480215 GN=hrcA PE=3 SV=1	16.1812	2383300
584	P.GAPGAPF.E		616.31	1	616.31	616.309	1.3	182	124.23	>tr|A0A6P2AZG8|A0A6P2AZG8_9CYAN Uncharacterized protein OS=Spirulina sp. DLM2.Bin59 OX=2480215 GN=EA366_03700 PE=4 SV=1	49.2576	2364800
585	L.AHLSQ.E		555.283	1	555.283	555.288	-10.7	714	183.3	>tr|A0A6P2AWY7|A0A6P2AWY7_9CYAN DNA polymerase I OS=Spirulina sp. DLM2.Bin59 OX=2480215 GN=polA PE=3 SV=1	25.1848	2315100
586	A.AATFPQHT.L		872.424	1	872.424	872.426	-2	27	222.64	>tr|A0A6P2AZL2|A0A6P2AZL2_9CYAN Uncharacterized protein (Fragment) OS=Spirulina sp. DLM2.Bin59 OX=2480215 GN=EA366_01405 PE=3 SV=1	29.9002	2234100
587	E.TVFENR.L		383.199	2	765.39	765.389	1.7	349	129.41	>tr|A0A6P2B082|A0A6P2B082_9CYAN UDP-N-acetylglucosamine 1-carboxyvinyltransferase OS=Spirulina sp. DLM2.Bin59 OX=2480215 GN=murA PE=3 SV=1	19.7656	2202300
588	P.TLYAYFESD.N		554.743	2	1108.48	1108.48	-3.8	79	136.72	>tr|A0A6P2AW29|A0A6P2AW29_9CYAN Non-specific serine/threonine protein kinase (Fragment) OS=Spirulina sp. DLM2.Bin59 OX=2480215 GN=EA366_04225 PE=4 SV=1	16.5681	2154300
589	C.TIAPF.D		548.31	1	548.31	548.308	4.6	119	104.71	>tr|A0A6P2AWM8|A0A6P2AWM8_9CYAN ATP-binding protein (Fragment) OS=Spirulina sp. DLM2.Bin59 OX=2480215 GN=EA366_02785 PE=4 SV=1	47.783	1926800
590	L.TNGEHLGR.R		442.223	2	883.438	883.438	-0.4	69	101.97	>tr|A0A6P2ASZ0|A0A6P2ASZ0_9CYAN Glucosylglycerol 3-phosphatase OS=Spirulina sp. DLM2.Bin59 OX=2480215 GN=stpA PE=4 SV=1	10.6557	1766500
591	G.IGIGAGIHGYA.P		514.784	2	1028.56	1028.55	9.1	215	182.72	>tr|A0A6P2APJ8|A0A6P2APJ8_9CYAN Permease OS=Spirulina sp. DLM2.Bin59 OX=2480215 GN=EA366_11350 PE=3 SV=1	33.3668	1764500
592	A.VLQPS.Q		543.315	1	543.315	543.314	3.2	71	122.51	>tr|A0A6P2AKN4|A0A6P2AKN4_9CYAN Low-complexity tail membrane protein OS=Spirulina sp. DLM2.Bin59 OX=2480215 GN=EA366_13745 PE=4 SV=1	15.9368	1675000
593	R.QPQLVFASP.S		493.771	2	986.535	986.531	4.2	43	105.92	>tr|A0A6P2AY23|A0A6P2AY23_9CYAN ABC transporter substrate-binding protein OS=Spirulina sp. DLM2.Bin59 OX=2480215 GN=EA366_04075 PE=4 SV=1	37.1969	1653900
594	L.QEPADFWP.F		495.227	2	989.447	989.436	10.6	69	101.38	>tr|A0A6P2AWF4|A0A6P2AWF4_9CYAN Lipid-A-disaccharide synthase OS=Spirulina sp. DLM2.Bin59 OX=2480215 GN=EA366_04795 PE=4 SV=1	19.5156	1644600
595	L.LTKYH.V		331.192	2	661.377	661.367	16	541	115.11	>tr|A0A6P2AXQ6|A0A6P2AXQ6_9CYAN Uncharacterized protein (Fragment) OS=Spirulina sp. DLM2.Bin59 OX=2480215 GN=EA366_03445 PE=4 SV=1	12.8511	1635800
596	G.NFPF.A		524.251	1	524.251	524.25	1.1	92	145.28	>tr|A0A6P2AUS6|A0A6P2AUS6_9CYAN NCS2 family permease OS=Spirulina sp. DLM2.Bin59 OX=2480215 GN=EA366_11060 PE=3 SV=1	53.6294	1633700
597	S.TYPPALK.A		395.228	2	789.449	789.451	-1.6	18	113.12	>tr|A0A6P2ASK9|A0A6P2ASK9_9CYAN Uncharacterized protein OS=Spirulina sp. DLM2.Bin59 OX=2480215 GN=EA366_10730 PE=4 SV=1	27.7697	1601200
598	Y.IIVPI.F		554.394	1	554.394	554.391	4.4	330	260.26	>tr|A0A6P2ASQ3|A0A6P2ASQ3_9CYAN GAF domain-containing protein OS=Spirulina sp. DLM2.Bin59 OX=2480215 GN=EA366_09455 PE=4 SV=1	54.9614	1558600
599	M.KGEYPFTIT.N		528.279	2	1055.55	1055.54	9.5	233	180.25	>tr|A0A6P2AIU0|A0A6P2AIU0_9CYAN Circadian clock protein kinase KaiC OS=Spirulina sp. DLM2.Bin59 OX=2480215 GN=kaiC PE=3 SV=1	10.2774	1531700
600	A.QFLA.T		478.268	1	478.268	478.266	4.7	554	135.41	>tr|A0A6P2AWA4|A0A6P2AWA4_9CYAN Serine/threonine-protein kinase PknK (Fragment) OS=Spirulina sp. DLM2.Bin59 OX=2480215 GN=EA366_04690 PE=4 SV=1	38.16	1243100
601	Q.VLYHWARF.Y		546.296	2	1091.59	1091.58	6.3	503	116.66	>tr|A0A6P2AMK2|A0A6P2AMK2_9CYAN TPR_REGION domain-containing protein (Fragment) OS=Spirulina sp. DLM2.Bin59 OX=2480215 GN=EA366_13880 PE=4 SV=1	52.0936	1175700
602	G.FSPM.T		481.208	1	481.208	481.212	-7.8	800	178.02	>tr|A0A6P2AYF0|A0A6P2AYF0_9CYAN Uncharacterized protein (Fragment) OS=Spirulina sp. DLM2.Bin59 OX=2480215 GN=EA366_04220 PE=4 SV=1	55.306	1127200
603	V.QIPDQYLALGQPH.Q		493.929	3	1479.77	1479.76	9.8	139	186.83	>tr|A0A6P2AXJ3|A0A6P2AXJ3_9CYAN DUF928 domain-containing protein OS=Spirulina sp. DLM2.Bin59 OX=2480215 GN=EA366_05890 PE=4 SV=1	16.1934	996990
604	R.AHASTEGVTK.Y		500.758	2	1000.51	1000.51	2.5	156	117.22	>tr|A0A6P2AWI8|A0A6P2AWI8_9CYAN Phosphoglycerate kinase OS=Spirulina sp. DLM2.Bin59 OX=2480215 GN=pgk PE=3 SV=1	10.3307	819270
605	I.TAAGY.R		482.226	1	482.226	482.224	3.5	445	108.62	>tr|A0A6P2AL02|A0A6P2AL02_9CYAN Orotate phosphoribosyltransferase OS=Spirulina sp. DLM2.Bin59 OX=2480215 GN=pyrE PE=3 SV=1	19.0473	768170
606	R.TVVRVIPLT.H		499.326	2	997.645	997.64	4.9	528	110.44	>tr|A0A6P2AW12|A0A6P2AW12_9CYAN DNA repair protein RecN OS=Spirulina sp. DLM2.Bin59 OX=2480215 GN=recN PE=3 SV=1	56.5925	765120
607	E.IIC[+57.021]EQFSPI.W	C[+57]	553.787	2	1106.57	1106.56	10.1	39	134.23	>tr|A0A6P2AY08|A0A6P2AY08_9CYAN Bile acid beta-glucosidase (Fragment) OS=Spirulina sp. DLM2.Bin59 OX=2480215 GN=EA366_00895 PE=4 SV=1	57.0951	658440
608	G.VPF.F		362.207	1	362.207	362.207	-0.1	220	125.87	>tr|A0A6P2B2T6|A0A6P2B2T6_9CYAN ATP-dependent zinc metalloprotease FtsH OS=Spirulina sp. DLM2.Bin59 OX=2480215 GN=ftsH PE=3 SV=1	39.7519	0
609	G.LDYVR.H		333.185	2	665.362	665.362	0.3	275	116.34	>tr|A0A6P2ALU7|A0A6P2ALU7_9CYAN Thiamine-phosphate synthase (Fragment) OS=Spirulina sp. DLM2.Bin59 OX=2480215 GN=EA366_14075 PE=3 SV=1	24.7484	0
610	R.VAPYFA.D		334.176	2	667.345	667.345	-0.3	93	152.34	>tr|A0A6P2AJ54|A0A6P2AJ54_9CYAN VCBS repeat-containing protein (Fragment) OS=Spirulina sp. DLM2.Bin59 OX=2480215 GN=EA366_14465 PE=4 SV=1	24.2925	0
611	N.PHP.D		350.182	1	350.182	350.182	0.4	214	187.1	>tr|A0A6P2AV51|A0A6P2AV51_9CYAN DUF3536 domain-containing protein OS=Spirulina sp. DLM2.Bin59 OX=2480215 GN=EA366_09155 PE=4 SV=1	17.7947	0
612	I.QPTGAALPT.T		855.457	1	855.457	855.457	-0.5	50	106.89	>tr|A0A6P2ATS3|A0A6P2ATS3_9CYAN Cytosine deaminase OS=Spirulina sp. DLM2.Bin59 OX=2480215 GN=EA366_09810 PE=4 SV=1	28.0283	0
613	T.DLDLR.V		631.341	1	631.341	631.341	0.7	16	171.09	>tr|A0A6P2ATX1|A0A6P2ATX1_9CYAN Bifunctional aldolase/short-chain dehydrogenase OS=Spirulina sp. DLM2.Bin59 OX=2480215 GN=EA366_09755 PE=4 SV=1	24.319	0
614	D.VHSFES.F		705.32	1	705.32	705.32	-0.7	156	145	>tr|A0A6P2AY79|A0A6P2AY79_9CYAN Recombinase OS=Spirulina sp. DLM2.Bin59 OX=2480215 GN=EA366_01765 PE=4 SV=1	17.0789	0
615	S.QPQPLTL.F		796.456	1	796.456	796.456	-0.7	134	141.14	>tr|A0A6P2AUP5|A0A6P2AUP5_9CYAN Uncharacterized protein OS=Spirulina sp. DLM2.Bin59 OX=2480215 GN=EA366_09120 PE=4 SV=1	32.9239	0
616	Y.PVVVRP.S		333.719	2	666.43	666.43	0.9	717	110.66	>tr|A0A6P2AY40|A0A6P2AY40_9CYAN Carbamoyl-phosphate synthase large chain OS=Spirulina sp. DLM2.Bin59 OX=2480215 GN=carB PE=3 SV=1	32.5159	0
617	A.PHGLSF.E		329.171	2	657.335	657.336	-0.9	45	150.84	>tr|A0A6P2AT60|A0A6P2AT60_9CYAN DUF3539 family protein OS=Spirulina sp. DLM2.Bin59 OX=2480215 GN=EA366_10700 PE=4 SV=1	17.0929	0
618	R.YFDRA.A		336.161	2	671.315	671.315	1	18	190.69	>tr|A0A6P2AJB8|A0A6P2AJB8_9CYAN Allophycocyanin subunit beta OS=Spirulina sp. DLM2.Bin59 OX=2480215 GN=apcB PE=3 SV=1	20.6106	0
619	G.YPL.Q		392.218	1	392.218	392.218	1	105	137.43	>tr|A0A6P2AXM7|A0A6P2AXM7_9CYAN Alpha-mannosidase (Fragment) OS=Spirulina sp. DLM2.Bin59 OX=2480215 GN=EA366_01625 PE=3 SV=1	33.0781	0
620	G.LGI.R		302.207	1	302.207	302.207	-1	202	107.94	>tr|A0A6P2AZJ7|A0A6P2AZJ7_9CYAN Phosphoenolpyruvate synthase OS=Spirulina sp. DLM2.Bin59 OX=2480215 GN=EA366_06245 PE=4 SV=1	32.9075	0
621	D.SQLLR.A		308.692	2	616.377	616.378	-1.1	853	231.46	>tr|A0A6P2AWY7|A0A6P2AWY7_9CYAN DNA polymerase I OS=Spirulina sp. DLM2.Bin59 OX=2480215 GN=polA PE=3 SV=1	18.5899	0
622	T.FEYR.L		307.65	2	614.293	614.293	-1.2	460	187.04	>tr|A0A6P2AX43|A0A6P2AX43_9CYAN PAS domain S-box protein OS=Spirulina sp. DLM2.Bin59 OX=2480215 GN=EA366_02485 PE=4 SV=1	19.2532	0
623	Q.TAAPQFPN.R		845.414	1	845.414	845.415	-1.3	140	103.48	>tr|A0A6P2AQX5|A0A6P2AQX5_9CYAN DUF3685 domain-containing protein OS=Spirulina sp. DLM2.Bin59 OX=2480215 GN=EA366_11010 PE=4 SV=1	39.2957	0
624	L.AGLPDVVI.Q		783.46	1	783.46	783.461	-1.3	823	102.69	>tr|A0A6P2AUR1|A0A6P2AUR1_9CYAN DNA mismatch repair protein MutS OS=Spirulina sp. DLM2.Bin59 OX=2480215 GN=mutS PE=3 SV=1	54.6059	0
625	A.TTLIRP.L		350.722	2	700.436	700.435	1.5	331	136.19	>tr|A0A6P2AVT4|A0A6P2AVT4_9CYAN 4Fe-4S ferredoxin OS=Spirulina sp. DLM2.Bin59 OX=2480215 GN=EA366_06050 PE=4 SV=1	27.2795	0
626	L.YFDR.L		300.642	2	600.277	600.278	-1.5	151	125.42	>tr|A0A6P2AWY7|A0A6P2AWY7_9CYAN DNA polymerase I OS=Spirulina sp. DLM2.Bin59 OX=2480215 GN=polA PE=3 SV=1	18.8603	0
627	K.QLSM.V		478.232	1	478.232	478.233	-1.6	594	150.28	>tr|A0A6P2B307|A0A6P2B307_9CYAN Histidine kinase (Fragment) OS=Spirulina sp. DLM2.Bin59 OX=2480215 GN=EA366_00285 PE=4 SV=1	34.6115	0
628	I.GRFLR.S		324.7	2	648.393	648.394	-1.8	758	201.33	>tr|A0A6P2ANY1|A0A6P2ANY1_9CYAN DEAD/DEAH box helicase (Fragment) OS=Spirulina sp. DLM2.Bin59 OX=2480215 GN=EA366_12030 PE=4 SV=1	19.3668	0
629	A.GPLGVLQP.V		780.46	1	780.46	780.461	-1.9	69	124.16	>tr|A0A6P2AWJ3|A0A6P2AWJ3_9CYAN NAD(P)H-quinone oxidoreductase subunit 1 OS=Spirulina sp. DLM2.Bin59 OX=2480215 GN=nuoH PE=3 SV=1	38.5546	0
630	N.YSI.L		382.198	1	382.198	382.197	2.2	678	186.07	>tr|A0A6P2AV51|A0A6P2AV51_9CYAN DUF3536 domain-containing protein OS=Spirulina sp. DLM2.Bin59 OX=2480215 GN=EA366_09155 PE=4 SV=1	31.4773	0
631	V.AATAGSW.G		663.311	1	663.311	663.31	2.2	250	151.14	>tr|A0A6P2AVM2|A0A6P2AVM2_9CYAN Lipid II flippase MurJ (Fragment) OS=Spirulina sp. DLM2.Bin59 OX=2480215 GN=EA366_04695 PE=4 SV=1	20.7036	0
632	E.QHPQMI.L		377.188	2	753.369	753.371	-2.4	63	112.53	>tr|A0A6P2AXG2|A0A6P2AXG2_9CYAN DNA-binding response regulator OS=Spirulina sp. DLM2.Bin59 OX=2480215 GN=EA366_02800 PE=4 SV=1	23.1798	0
633	T.ATAEILGAN.Q		859.45	1	859.45	859.452	-2.5	97	180.17	>tr|A0A6P2AQB3|A0A6P2AQB3_9CYAN Tetratricopeptide repeat protein OS=Spirulina sp. DLM2.Bin59 OX=2480215 GN=EA366_12050 PE=4 SV=1	38.6099	0
634	E.LPRLEGPA.T		426.752	2	852.496	852.494	2.6	54	217.07	>tr|A0A6P2AJE5|A0A6P2AJE5_9CYAN Peptidyl-prolyl cis-trans isomerase OS=Spirulina sp. DLM2.Bin59 OX=2480215 GN=EA366_14290 PE=3 SV=1	30.832	0
635	T.WVF.A		451.235	1	451.235	451.234	2.6	314	115.84	>tr|A0A6P2ASB7|A0A6P2ASB7_9CYAN 4Fe-4S binding protein (Fragment) OS=Spirulina sp. DLM2.Bin59 OX=2480215 GN=EA366_11310 PE=4 SV=1	56.7165	0
636	R.PHQFPQ.S		377.188	2	753.37	753.368	2.6	62	100.33	>tr|A0A6P2AVF1|A0A6P2AVF1_9CYAN ATP-binding protein (Fragment) OS=Spirulina sp. DLM2.Bin59 OX=2480215 GN=EA366_06615 PE=4 SV=1	19.5638	0
637	E.IAGAF.D		478.267	1	478.267	478.266	2.7	1247	166.91	>tr|A0A6P2AYU0|A0A6P2AYU0_9CYAN Uncharacterized protein OS=Spirulina sp. DLM2.Bin59 OX=2480215 GN=EA366_04890 PE=4 SV=1	40.3906	0
638	A.AATFPQHT.L		872.428	1	872.428	872.426	2.8	27	228.95	>tr|A0A6P2AZL2|A0A6P2AZL2_9CYAN Uncharacterized protein (Fragment) OS=Spirulina sp. DLM2.Bin59 OX=2480215 GN=EA366_01405 PE=3 SV=1	41.8592	0
639	A.LYP.V		392.219	1	392.219	392.218	2.8	773	177.1	>tr|A0A6P2ANI6|A0A6P2ANI6_9CYAN BON domain-containing protein OS=Spirulina sp. DLM2.Bin59 OX=2480215 GN=EA366_12105 PE=4 SV=1	27.9399	0
640	P.IPVF.Y		475.293	1	475.293	475.291	2.8	479	113.89	>tr|A0A6P2AK89|A0A6P2AK89_9CYAN Isoleucine--tRNA ligase OS=Spirulina sp. DLM2.Bin59 OX=2480215 GN=ileS PE=3 SV=1	49.9182	0
641	V.LPFV.Y		475.293	1	475.293	475.291	2.8	154	113.89	>tr|A0A6P2AWQ0|A0A6P2AWQ0_9CYAN Uncharacterized protein (Fragment) OS=Spirulina sp. DLM2.Bin59 OX=2480215 GN=EA366_06565 PE=4 SV=1	49.9182	0
642	R.PLNLPQPQS.E		993.539	1	993.539	993.536	3.1	62	170.27	>tr|A0A6P2AX20|A0A6P2AX20_9CYAN Glycine dehydrogenase (decarboxylating) OS=Spirulina sp. DLM2.Bin59 OX=2480215 GN=gcvP PE=3 SV=1	29.9429	0
643	G.QLPFP.S		601.336	1	601.336	601.334	3.1	226	144.66	>tr|A0A6P2AWA4|A0A6P2AWA4_9CYAN Serine/threonine-protein kinase PknK (Fragment) OS=Spirulina sp. DLM2.Bin59 OX=2480215 GN=EA366_04690 PE=4 SV=1	32.2937	0
644	N.SSLGLDFP.H		418.215	2	835.422	835.42	3.2	367	140.51	>tr|A0A6P2AUL7|A0A6P2AUL7_9CYAN Amidohydrolase OS=Spirulina sp. DLM2.Bin59 OX=2480215 GN=EA366_09590 PE=4 SV=1	33.9103	0
645	R.YELF.T		571.278	1	571.278	571.276	3.2	760	120.36	>tr|A0A6P2AS94|A0A6P2AS94_9CYAN EAL domain-containing protein (Fragment) OS=Spirulina sp. DLM2.Bin59 OX=2480215 GN=EA366_10275 PE=4 SV=1	51.6057	0
646	N.FPLP.R		473.277	1	473.277	473.276	3.2	1239	108.81	>tr|A0A6P2AYU0|A0A6P2AYU0_9CYAN Uncharacterized protein OS=Spirulina sp. DLM2.Bin59 OX=2480215 GN=EA366_04890 PE=4 SV=1	48.896	0
647	E.QPGAFFGMPY.Q		557.753	2	1114.5	1114.5	-3.4	190	160.15	>tr|A0A6P2AVU8|A0A6P2AVU8_9CYAN Carotenoid biosynthesis protein OS=Spirulina sp. DLM2.Bin59 OX=2480215 GN=EA366_05550 PE=4 SV=1	35.6713	0
648	M.DHPF.I		515.227	1	515.227	515.225	3.5	2	289.99	>tr|A0A6P2AWR4|A0A6P2AWR4_9CYAN CHAT domain-containing protein OS=Spirulina sp. DLM2.Bin59 OX=2480215 GN=EA366_06555 PE=4 SV=1	21.0965	0
649	F.FSAL.G		437.241	1	437.241	437.24	3.5	858	121.77	>tr|A0A6P2AKL0|A0A6P2AKL0_9CYAN Efflux RND transporter permease subunit OS=Spirulina sp. DLM2.Bin59 OX=2480215 GN=EA366_14490 PE=4 SV=1	36.2845	0
650	E.TAAQIDHFY.Q		533.255	2	1065.5	1065.5	3.5	344	103.96	>tr|A0A6P2AUT9|A0A6P2AUT9_9CYAN Type 2 lantipeptide synthetase LanM OS=Spirulina sp. DLM2.Bin59 OX=2480215 GN=lanM PE=4 SV=1	24.012	0
651	D.QPSPQ.L		556.274	1	556.274	556.273	3.6	35	114.76	>tr|A0A6P2AY18|A0A6P2AY18_9CYAN PAS domain S-box protein (Fragment) OS=Spirulina sp. DLM2.Bin59 OX=2480215 GN=EA366_04135 PE=3 SV=1	22.0669	0
652	L.FLLL.G		505.34	1	505.34	505.338	3.6	555	106.61	>tr|A0A6P2ASB7|A0A6P2ASB7_9CYAN 4Fe-4S binding protein (Fragment) OS=Spirulina sp. DLM2.Bin59 OX=2480215 GN=EA366_11310 PE=4 SV=1	60.9614	0
653	Q.IPQQQPQ.S		838.445	1	838.445	838.442	3.7	266	172.3	>tr|A0A6P2AL02|A0A6P2AL02_9CYAN Orotate phosphoribosyltransferase OS=Spirulina sp. DLM2.Bin59 OX=2480215 GN=pyrE PE=3 SV=1	16.9735	0
654	I.TQLPA.W		529.3	1	529.3	529.298	3.7	71	139.37	>tr|A0A6P2AVQ7|A0A6P2AVQ7_9CYAN Uncharacterized protein OS=Spirulina sp. DLM2.Bin59 OX=2480215 GN=EA366_06275 PE=4 SV=1	22.1431	0
655	E.YFWDK.R		379.68	2	758.354	758.351	4	321	133.58	>tr|A0A6P2AZ82|A0A6P2AZ82_9CYAN Magnesium chelatase OS=Spirulina sp. DLM2.Bin59 OX=2480215 GN=EA366_04130 PE=3 SV=1	21.3708	0
656	A.QLLLQ.V		614.39	1	614.39	614.387	4.4	889	182.95	>tr|A0A6P2AWY7|A0A6P2AWY7_9CYAN DNA polymerase I OS=Spirulina sp. DLM2.Bin59 OX=2480215 GN=polA PE=3 SV=1	49.4637	0
657	G.IPTH.A		467.263	1	467.263	467.261	4.4	798	151.67	>tr|A0A6P2AZJ7|A0A6P2AZJ7_9CYAN Phosphoenolpyruvate synthase OS=Spirulina sp. DLM2.Bin59 OX=2480215 GN=EA366_06245 PE=4 SV=1	16.8987	0
658	A.LSNGY.L		553.264	1	553.264	553.262	4.4	205	111.04	>tr|A0A6P2ARN8|A0A6P2ARN8_9CYAN Transglutaminase family protein (Fragment) OS=Spirulina sp. DLM2.Bin59 OX=2480215 GN=EA366_09910 PE=4 SV=1	26.6338	0
659	R.LFPNRH.P		392.218	2	783.43	783.426	4.5	128	132.52	>tr|A0A6P2ALN6|A0A6P2ALN6_9CYAN FAD-dependent oxidoreductase OS=Spirulina sp. DLM2.Bin59 OX=2480215 GN=EA366_14215 PE=3 SV=1	25.8322	0
660	K.ITPF.D		477.273	1	477.273	477.271	4.6	894	133.07	>tr|A0A6P2ASU0|A0A6P2ASU0_9CYAN DNA-directed RNA polymerase subunit beta OS=Spirulina sp. DLM2.Bin59 OX=2480215 GN=rpoB PE=3 SV=1	41.1616	0
661	W.ILLF.P		505.341	1	505.341	505.338	4.6	860	126.26	>tr|A0A6P2AZJ7|A0A6P2AZJ7_9CYAN Phosphoenolpyruvate synthase OS=Spirulina sp. DLM2.Bin59 OX=2480215 GN=EA366_06245 PE=4 SV=1	61.5923	0
662	V.VVFHTADLK.R		515.292	2	1029.58	1029.57	4.7	424	170.21	>tr|A0A6P2APR0|A0A6P2APR0_9CYAN SagB/ThcOx family dehydrogenase OS=Spirulina sp. DLM2.Bin59 OX=2480215 GN=EA366_12445 PE=4 SV=1	26.2597	0
663	T.TSVPF.L		550.29	1	550.29	550.287	4.7	19	130.5	>tr|A0A6P2AXD8|A0A6P2AXD8_9CYAN Chromosome partition protein Smc OS=Spirulina sp. DLM2.Bin59 OX=2480215 GN=smc PE=3 SV=1	39.9778	0
664	T.PQPH.P		478.243	1	478.243	478.241	4.8	82	275.28	>tr|A0A6P2AM86|A0A6P2AM86_9CYAN YlxR family protein OS=Spirulina sp. DLM2.Bin59 OX=2480215 GN=EA366_15790 PE=4 SV=1	16.2639	0
665	G.TGGFL.V		494.263	1	494.263	494.261	4.9	193	268.58	>tr|A0A6P2APS9|A0A6P2APS9_9CYAN Site-specific DNA-methyltransferase (adenine-specific) OS=Spirulina sp. DLM2.Bin59 OX=2480215 GN=EA366_12365 PE=3 SV=1	40.2214	0
666	P.QPQQEHLL.I		496.764	2	992.521	992.516	5	7	153.83	>tr|A0A6P2AMU0|A0A6P2AMU0_9CYAN FHA domain-containing protein OS=Spirulina sp. DLM2.Bin59 OX=2480215 GN=EA366_13040 PE=4 SV=1	29.2795	0
667	R.QLIPQ.A		598.359	1	598.359	598.356	5.1	301	200.92	>tr|A0A6P2AUZ2|A0A6P2AUZ2_9CYAN Aldo/keto reductase OS=Spirulina sp. DLM2.Bin59 OX=2480215 GN=EA366_07305 PE=4 SV=1	35.1904	0
668	A.WQMPQRW.R		516.25	2	1031.49	1031.49	5.2	42	154.96	>tr|A0A6P2AUC6|A0A6P2AUC6_9CYAN DUF4131 domain-containing protein OS=Spirulina sp. DLM2.Bin59 OX=2480215 GN=EA366_07985 PE=4 SV=1	21.9292	0
669	L.IPGWI.E		585.342	1	585.342	585.34	5.2	98	117.66	>tr|A0A6P2AVC9|A0A6P2AVC9_9CYAN Glycosyltransferase family 2 protein (Fragment) OS=Spirulina sp. DLM2.Bin59 OX=2480215 GN=EA366_09675 PE=4 SV=1	59.9202	0
670	G.TVLLQ.N		573.364	1	573.364	573.361	5.6	226	281.08	>tr|A0A6P2B036|A0A6P2B036_9CYAN DUF928 domain-containing protein OS=Spirulina sp. DLM2.Bin59 OX=2480215 GN=EA366_00375 PE=4 SV=1	36.2677	0
671	T.IPVQQQP.T		809.447	1	809.447	809.452	-5.8	550	129.38	>tr|A0A6P2AYN6|A0A6P2AYN6_9CYAN PAS domain S-box protein OS=Spirulina sp. DLM2.Bin59 OX=2480215 GN=EA366_01700 PE=4 SV=1	30.5383	0
672	G.TM[+15.995]VGGY.N	M[+16]	322.139	2	643.272	643.276	-6.2	92	125.56	>tr|A0A6P2AP60|A0A6P2AP60_9CYAN Aconitate hydratase B OS=Spirulina sp. DLM2.Bin59 OX=2480215 GN=acnB PE=3 SV=1	17.2152	0
673	S.QPQPSLHFP.L		525.768	2	1050.53	1050.54	-7.7	58	151.87	>tr|A0A6P2AKP5|A0A6P2AKP5_9CYAN NERD domain-containing protein OS=Spirulina sp. DLM2.Bin59 OX=2480215 GN=EA366_14950 PE=4 SV=1	47.2658	0
674	T.PQPH.P		478.245	1	478.245	478.241	8.4	82	105.01	>tr|A0A6P2AM86|A0A6P2AM86_9CYAN YlxR family protein OS=Spirulina sp. DLM2.Bin59 OX=2480215 GN=EA366_15790 PE=4 SV=1	17.2889	0
675	T.PQPH.P		478.245	1	478.245	478.241	8.5	82	158.2	>tr|A0A6P2AM86|A0A6P2AM86_9CYAN YlxR family protein OS=Spirulina sp. DLM2.Bin59 OX=2480215 GN=EA366_15790 PE=4 SV=1	16.7753	0
676	Y.QESRFTH.Y		452.713	2	904.419	904.427	-8.5	366	125.24	>tr|A0A6P2AW07|A0A6P2AW07_9CYAN EAL domain-containing protein OS=Spirulina sp. DLM2.Bin59 OX=2480215 GN=EA366_05225 PE=4 SV=1	21.0266	0
677	S.IIAPDAFIQ.T		494.274	2	987.54	987.551	-10.9	104	156.7	>tr|A0A6P2AU70|A0A6P2AU70_9CYAN dTDP-glucose 4,6-dehydratase OS=Spirulina sp. DLM2.Bin59 OX=2480215 GN=rfbB PE=3 SV=1	20.6317	0
678	L.QPQEIETRL.Q		557.292	2	1113.58	1113.59	-11	110	108.94	>tr|A0A6P2AMK4|A0A6P2AMK4_9CYAN AHJR-like domain-containing protein OS=Spirulina sp. DLM2.Bin59 OX=2480215 GN=EA366_12400 PE=4 SV=1	35.6713	0
679	D.LGPADE.E		301.141	2	601.275	601.283	-13.2	154	112.13	>tr|A0A6P2AUN7|A0A6P2AUN7_9CYAN DUF305 domain-containing protein OS=Spirulina sp. DLM2.Bin59 OX=2480215 GN=EA366_06420 PE=4 SV=1	32.9075	0
680	Q.IFKHAALA.A		435.758	2	870.508	870.52	-13.2	36	104.07	>tr|A0A6P2ANL1|A0A6P2ANL1_9CYAN Aldehyde-alcohol dehydrogenase OS=Spirulina sp. DLM2.Bin59 OX=2480215 GN=EA366_13120 PE=3 SV=1	37.6641	0
681	K.ATPQPDYPL.F		1001.51	1	1001.51	1001.49	13.6	79	111.76	>tr|A0A6P2B336|A0A6P2B336_9CYAN Glucose-6-phosphate dehydrogenase assembly protein OpcA (Fragment) OS=Spirulina sp. DLM2.Bin59 OX=2480215 GN=opcA PE=4 SV=1	35.3999	0
682	A.AATFPQHTL.R		493.265	2	985.524	985.51	13.7	27	105.65	>tr|A0A6P2AZL2|A0A6P2AZL2_9CYAN Uncharacterized protein (Fragment) OS=Spirulina sp. DLM2.Bin59 OX=2480215 GN=EA366_01405 PE=3 SV=1	38.0113	0
683	R.LPEAKHYPQ.E		541.793	2	1082.58	1082.56	13.9	254	107.32	>tr|A0A6P2AP86|A0A6P2AP86_9CYAN Alpha/beta fold hydrolase OS=Spirulina sp. DLM2.Bin59 OX=2480215 GN=EA366_11545 PE=4 SV=1	28.0744	0
684	I.ISAGFK.E		311.677	2	622.346	622.356	-15.6	117	142.83	>tr|A0A6P2AR10|A0A6P2AR10_9CYAN GNAT family N-acetyltransferase OS=Spirulina sp. DLM2.Bin59 OX=2480215 GN=EA366_10945 PE=4 SV=1	47.3585	0
685	E.TGFST.K		512.227	1	512.227	512.235	-16.1	71	124.18	>tr|A0A6P2AVM1|A0A6P2AVM1_9CYAN Uncharacterized protein OS=Spirulina sp. DLM2.Bin59 OX=2480215 GN=EA366_08550 PE=4 SV=1	21.0197	0
686	I.TTLGFH.N		338.171	2	675.334	675.346	-17.7	172	101.35	>tr|A0A6P2AXE4|A0A6P2AXE4_9CYAN Light-independent protochlorophyllide reductase subunit B OS=Spirulina sp. DLM2.Bin59 OX=2480215 GN=chlB PE=3 SV=1	18.668	0
687	H.QPLFWDGE.I		496.239	2	991.471	991.452	19.3	284	111.16	>tr|A0A6P2AK32|A0A6P2AK32_9CYAN MBL fold metallo-hydrolase OS=Spirulina sp. DLM2.Bin59 OX=2480215 GN=EA366_14105 PE=4 SV=1	29.5777	0
