# Supplementary material for: Isolation, identification and in vivo antihypertensive effect of novel angiotensin I-converting enzyme (ACE) inhibitory peptides from Spirulina protein hydrolysate
Source: Royal Society of Chemistry journal article supplement (doi:10.1039/d2fo01207c), 2022-01-01
Supplement: d2fo01207c3.xlsx [file d2fo01207c3.xlsx]

## Sheet: Spectra
	Peptide < ProteinMetrics Confidential >	Modification Type(s)	Observed m/z	z	Observed (M+H)	Calc. mass (M+H)	Mass error (ppm)	Starting position	Score	Protein Name	Scan Time	intensity
1	H.VTY.F		382.198	1	382.198	382.197	0.9	335	186.98	>tr|A0A6P2AMN0|A0A6P2AMN0_9CYAN 2,3-bisphosphoglycerate-independent phosphoglycerate mutase OS=Spirulina sp. DLM2.Bin59 OX=2480215 GN=gpmI PE=3 SV=1	23.7589	339830000
2	A.TVLYEH.F		381.188	2	761.369	761.383	-18	114	91.71	>tr|A0A6P2AYQ4|A0A6P2AYQ4_9CYAN Uncharacterized protein OS=Spirulina sp. DLM2.Bin59 OX=2480215 GN=EA366_03645 PE=4 SV=1	23.7589	339830000
3	V.KDEYKHLNFGEV.W		739.861	2	1478.71	1478.73	-8.9	142	74.96	>tr|A0A6P2AXR1|A0A6P2AXR1_9CYAN Aldehyde decarbonylase OS=Spirulina sp. DLM2.Bin59 OX=2480215 GN=EA366_05485 PE=3 SV=1	35.9636	83480000
4	D.RVVPVQP.I		397.748	2	794.488	794.488	-0.1	239	192.3	>tr|A0A6P2AX69|A0A6P2AX69_9CYAN dTDP-4-dehydrorhamnose reductase OS=Spirulina sp. DLM2.Bin59 OX=2480215 GN=rfbD PE=3 SV=1	29.8568	61057000
5	E.ILY.M		408.249	1	408.249	408.249	-0.6	98	139.58	>tr|A0A6P2B207|A0A6P2B207_9CYAN O-antigen ligase family protein OS=Spirulina sp. DLM2.Bin59 OX=2480215 GN=EA366_01800 PE=4 SV=1	38.9316	61057000
6	A.YVPASHA.K		744.366	1	744.366	744.367	-1.8	145	50.78	>tr|A0A6P2ASY2|A0A6P2ASY2_9CYAN DUF928 domain-containing protein OS=Spirulina sp. DLM2.Bin59 OX=2480215 GN=EA366_08705 PE=4 SV=1	34.4995	59117000
7	H.PFAAGLSL.K		775.432	1	775.432	775.435	-3.3	436	62.96	>tr|A0A6P2AUL3|A0A6P2AUL3_9CYAN Single-stranded-DNA-specific exonuclease RecJ OS=Spirulina sp. DLM2.Bin59 OX=2480215 GN=recJ PE=3 SV=1	52.3954	59117000
8	P.QILPQ.L		598.356	1	598.356	598.356	-0.4	73	219.78	>tr|A0A6P2AR22|A0A6P2AR22_9CYAN Pyrroline-5-carboxylate reductase OS=Spirulina sp. DLM2.Bin59 OX=2480215 GN=proC PE=3 SV=1	31.0081	59117000
9	L.AIMALW.E		704.395	1	704.395	704.38	21.9	23	5.14	>tr|A0A6P2AWH6|A0A6P2AWH6_9CYAN Sterol desaturase family protein OS=Spirulina sp. DLM2.Bin59 OX=2480215 GN=EA366_08520 PE=4 SV=1	51.6042	50333000
10	G.VTGGGY.A		553.262	1	553.262	553.262	0.3	566	170.72	>tr|A0A6P2ARN4|A0A6P2ARN4_9CYAN Penicillin-insensitive transglycosylase OS=Spirulina sp. DLM2.Bin59 OX=2480215 GN=EA366_11685 PE=4 SV=1	27.5398	50333000
11	L.ETTRSQAADLAFAIK.E		811.419	2	1621.83	1621.85	-14.1	381	20.02	>tr|A0A6P2ASQ3|A0A6P2ASQ3_9CYAN GAF domain-containing protein OS=Spirulina sp. DLM2.Bin59 OX=2480215 GN=EA366_09455 PE=4 SV=1	45.538	44469000
12	S.QQPPAY.-		703.34	1	703.34	703.341	-1.2	133	102.85	>tr|A0A6P2AS44|A0A6P2AS44_9CYAN Uncharacterized protein OS=Spirulina sp. DLM2.Bin59 OX=2480215 GN=EA366_09930 PE=4 SV=1	48.2624	42495000
13	D.QVPVVY.T		704.396	1	704.396	704.398	-2.7	341	43.59	>tr|A0A6P2AKN2|A0A6P2AKN2_9CYAN Fibronectin-binding domain-containing protein (Fragment) OS=Spirulina sp. DLM2.Bin59 OX=2480215 GN=EA366_15045 PE=4 SV=1	48.2624	42495000
14	Q.QPQWF.P		705.343	1	705.343	705.336	10.5	119	134.59	>tr|A0A6P2AS94|A0A6P2AS94_9CYAN EAL domain-containing protein (Fragment) OS=Spirulina sp. DLM2.Bin59 OX=2480215 GN=EA366_10275 PE=4 SV=1	32.755	40299000
15	K.LVAAPVSH.S		397.231	2	793.456	793.457	-1.5	920	102.63	>tr|A0A6P2AKA6|A0A6P2AKA6_9CYAN Replicative DNA helicase OS=Spirulina sp. DLM2.Bin59 OX=2480215 GN=dnaB PE=3 SV=1	30.8691	31228000
16	P.LQLLIPTLDPA.E		597.361	2	1193.71	1193.71	0.1	146	8.9	>tr|A0A6P2AMC9|A0A6P2AMC9_9CYAN DUF3122 domain-containing protein OS=Spirulina sp. DLM2.Bin59 OX=2480215 GN=EA366_15710 PE=4 SV=1	62.8004	30102000
17	G.SVGPNTGQNYIIDT.F		739.861	2	1478.71	1478.71	1.3	228	59.53	>tr|A0A6P2AZ56|A0A6P2AZ56_9CYAN Urea ABC transporter permease subunit UrtB OS=Spirulina sp. DLM2.Bin59 OX=2480215 GN=urtB PE=4 SV=1	36.4728	30102000
18	F.AATQSTYNALAAPN.P		696.846	2	1392.68	1392.68	6	548	118.9	>tr|A0A6P2AUK6|A0A6P2AUK6_9CYAN Uncharacterized protein (Fragment) OS=Spirulina sp. DLM2.Bin59 OX=2480215 GN=EA366_06580 PE=4 SV=1	20.0401	28499000
19	F.TVGEKNY.L		810.396	1	810.396	810.399	-3.5	98	123.56	>tr|A0A6P2AVY6|A0A6P2AVY6_9CYAN ATP-binding protein OS=Spirulina sp. DLM2.Bin59 OX=2480215 GN=EA366_08225 PE=4 SV=1	37.1445	21710000
20	P.TAAQWAELQFAWQ.V		775.374	2	1549.74	1549.74	-2.3	393	20.95	>tr|A0A6P2AWQ6|A0A6P2AWQ6_9CYAN Bifunctional purine biosynthesis protein PurH OS=Spirulina sp. DLM2.Bin59 OX=2480215 GN=purH PE=3 SV=1	52.3954	21062000
21	Y.QERELGNQPQ.P		599.795	2	1198.58	1198.58	1.9	176	114.8	>tr|A0A6P2ASW8|A0A6P2ASW8_9CYAN Crp/Fnr family transcriptional regulator OS=Spirulina sp. DLM2.Bin59 OX=2480215 GN=EA366_08945 PE=4 SV=1	31.5166	21062000
22	L.QLQELDPENL.P		599.796	2	1198.58	1198.6	-9.2	110	106.28	>tr|A0A6P2AV05|A0A6P2AV05_9CYAN TerB family tellurite resistance protein OS=Spirulina sp. DLM2.Bin59 OX=2480215 GN=EA366_07105 PE=4 SV=1	33.2257	21062000
23	D.TITASYFGNPQ.G		599.796	2	1198.58	1198.57	8.6	112	96.03	>tr|A0A6P2AMH9|A0A6P2AMH9_9CYAN PAS domain S-box protein OS=Spirulina sp. DLM2.Bin59 OX=2480215 GN=EA366_15615 PE=3 SV=1	32.0207	21062000
24	V.YGPYT.T		600.269	1	600.269	600.266	4.5	112	38.3	>tr|A0A6P2AZ44|A0A6P2AZ44_9CYAN Peptidoglycan-binding protein OS=Spirulina sp. DLM2.Bin59 OX=2480215 GN=EA366_04315 PE=4 SV=1	31.0081	21062000
25	E.LFPQQP.I		729.391	1	729.391	729.393	-3.3	108	98.71	>tr|A0A6P2AR22|A0A6P2AR22_9CYAN Pyrroline-5-carboxylate reductase OS=Spirulina sp. DLM2.Bin59 OX=2480215 GN=proC PE=3 SV=1	35.4011	20565000
26	Q.AATNQSH.H		728.324	1	728.324	728.332	-11.1	339	45.31	>tr|A0A6P2AYX2|A0A6P2AYX2_9CYAN Uncharacterized protein OS=Spirulina sp. DLM2.Bin59 OX=2480215 GN=EA366_03325 PE=4 SV=1	34.7091	20565000
27	L.RSQPGKG.S		729.392	1	729.392	729.4	-11.7	454	0.47	>tr|A0A6P2AXP6|A0A6P2AXP6_9CYAN Histidine kinase OS=Spirulina sp. DLM2.Bin59 OX=2480215 GN=EA366_03475 PE=4 SV=1	35.9325	20565000
28	M.TVKRLLPF.Q		487.318	2	973.629	973.619	10	76	30.44	>tr|A0A6P2ATI6|A0A6P2ATI6_9CYAN Uncharacterized protein OS=Spirulina sp. DLM2.Bin59 OX=2480215 GN=EA366_11840 PE=4 SV=1	62.8047	20222000
29	G.QFPPQSQQ.R		480.233	2	959.459	959.458	1.1	733	206.69	>tr|A0A6P2AJR1|A0A6P2AJR1_9CYAN DUF1574 domain-containing protein OS=Spirulina sp. DLM2.Bin59 OX=2480215 GN=EA366_15565 PE=4 SV=1	27.4053	19889000
30	D.YEAIR.D		326.176	2	651.344	651.346	-3	23	279.47	>tr|A0A6P2AXR2|A0A6P2AXR2_9CYAN Uma2 family endonuclease OS=Spirulina sp. DLM2.Bin59 OX=2480215 GN=EA366_00770 PE=4 SV=1	19.2141	18445000
31	L.VGSLAAC[+57.021]ATPPTEGGAGGAGA.G	C[+57]	886.423	2	1771.84	1771.83	5.7	17	56.28	>tr|A0A6P2AXM0|A0A6P2AXM0_9CYAN Amino acid ABC transporter substrate-binding protein OS=Spirulina sp. DLM2.Bin59 OX=2480215 GN=EA366_01650 PE=3 SV=1	42.9172	17888000
32	G.SVGEYFL.D		814.386	1	814.386	814.398	-15.2	319	27.27	>tr|A0A6P2AYF7|A0A6P2AYF7_9CYAN Peptidase S1 domain-containing protein OS=Spirulina sp. DLM2.Bin59 OX=2480215 GN=EA366_01345 PE=4 SV=1	30.5927	17295000
33	A.AATPNSAPS.P		815.402	1	815.402	815.389	15.2	462	6.33	>tr|A0A6P2ANI6|A0A6P2ANI6_9CYAN BON domain-containing protein OS=Spirulina sp. DLM2.Bin59 OX=2480215 GN=EA366_12105 PE=4 SV=1	30.5927	17295000
34	L.KDDKFKDQM[+15.995]KD.L	M[+16]	707.339	2	1413.67	1413.67	2.4	370	35.51	>tr|A0A6P2AP55|A0A6P2AP55_9CYAN Molecular chaperone HtpG OS=Spirulina sp. DLM2.Bin59 OX=2480215 GN=htpG PE=3 SV=1	30.8759	17218000
35	A.SRQPGVMHA.C		491.742	2	982.476	982.489	-12.9	95	54.51	>tr|A0A6P2AN64|A0A6P2AN64_9CYAN Amidohydrolase (Fragment) OS=Spirulina sp. DLM2.Bin59 OX=2480215 GN=EA366_12150 PE=4 SV=1	22.2179	17198000
36	M.KDQPLEQ.R		857.45	1	857.45	857.436	16	2	30.1	>tr|A0A6P2ANR8|A0A6P2ANR8_9CYAN DUF1788 domain-containing protein OS=Spirulina sp. DLM2.Bin59 OX=2480215 GN=EA366_12170 PE=4 SV=1	38.612	16874000
37	T.QQPIIYPPPSE.R		634.835	2	1268.66	1268.65	7.9	96	94.4	>tr|A0A6P2AHE7|A0A6P2AHE7_9CYAN FAA hydrolase family protein OS=Spirulina sp. DLM2.Bin59 OX=2480215 GN=EA366_15690 PE=4 SV=1	40.4357	16456000
38	S.QPQNPKVRSLT.E		634.355	2	1267.7	1267.71	-6.4	875	32.29	>tr|A0A6P2AWE8|A0A6P2AWE8_9CYAN Cobaltochelatase subunit CobN (Fragment) OS=Spirulina sp. DLM2.Bin59 OX=2480215 GN=cobN PE=4 SV=1	40.4357	16456000
39	L.GAEDFSLYLQE.A		636.295	2	1271.58	1271.58	3.6	332	8.83	>tr|A0A6P2AN64|A0A6P2AN64_9CYAN Amidohydrolase (Fragment) OS=Spirulina sp. DLM2.Bin59 OX=2480215 GN=EA366_12150 PE=4 SV=1	41.4504	16456000
40	H.LQPAYQF.L		433.73	2	866.452	866.441	13.2	323	112.66	>tr|A0A6P2AS50|A0A6P2AS50_9CYAN DegT/DnrJ/EryC1/StrS family aminotransferase OS=Spirulina sp. DLM2.Bin59 OX=2480215 GN=EA366_11870 PE=3 SV=1	32.9222	16320000
41	V.HPQIPQF.L		433.729	2	866.451	866.452	-1.2	109	97.85	>tr|A0A6P2AX85|A0A6P2AX85_9CYAN Serine/threonine protein kinase OS=Spirulina sp. DLM2.Bin59 OX=2480215 GN=EA366_04020 PE=4 SV=1	31.9062	16320000
42	A.PSESWAQ.N		804.35	1	804.35	804.352	-2.3	454	7.07	>tr|A0A6P2AXW6|A0A6P2AXW6_9CYAN Uncharacterized protein OS=Spirulina sp. DLM2.Bin59 OX=2480215 GN=EA366_05200 PE=4 SV=1	38.907	15906000
43	I.SRSDYGPT.R		882.398	1	882.398	882.395	3.3	294	15.16	>tr|A0A6P2AYJ9|A0A6P2AYJ9_9CYAN DUF3086 domain-containing protein (Fragment) OS=Spirulina sp. DLM2.Bin59 OX=2480215 GN=EA366_01115 PE=4 SV=1	30.3406	15894000
44	V.QPQVLLLDEPFG.A		678.351	2	1355.69	1355.72	-19.2	150	192.12	>tr|A0A6P2AYN9|A0A6P2AYN9_9CYAN Sulfate/thiosulfate import ATP-binding protein CysA OS=Spirulina sp. DLM2.Bin59 OX=2480215 GN=cysA PE=3 SV=1	43.8802	14029000
45	T.GAEQAAMAGQLQK.L		651.838	2	1302.67	1302.65	16.9	385	29.04	>tr|A0A6P2AYX2|A0A6P2AYX2_9CYAN Uncharacterized protein OS=Spirulina sp. DLM2.Bin59 OX=2480215 GN=EA366_03325 PE=4 SV=1	24.3668	13602000
46	S.SREHAPQ.A		824.391	1	824.391	824.401	-11.6	78	92.42	>tr|A0A6P2APS0|A0A6P2APS0_9CYAN 3-isopropylmalate dehydratase OS=Spirulina sp. DLM2.Bin59 OX=2480215 GN=leuD PE=3 SV=1	42.9107	12582000
47	Q.ASTLQINQ.L		874.464	1	874.464	874.463	0.8	376	158.75	>tr|A0A6P2ASS0|A0A6P2ASS0_9CYAN Chemotaxis protein OS=Spirulina sp. DLM2.Bin59 OX=2480215 GN=EA366_08905 PE=4 SV=1	33.3657	12148000
48	I.DDIQHPPPLPF.L		638.322	2	1275.64	1275.64	0.3	402	141.25	>tr|A0A6P2AYA9|A0A6P2AYA9_9CYAN GAF domain-containing protein OS=Spirulina sp. DLM2.Bin59 OX=2480215 GN=EA366_05925 PE=4 SV=1	56.6307	12013000
49	N.QFNALPVENLM.G		638.322	2	1275.64	1275.64	-2.6	278	58.82	>tr|A0A6P2AUX9|A0A6P2AUX9_9CYAN Glycosyltransferase family 9 protein OS=Spirulina sp. DLM2.Bin59 OX=2480215 GN=EA366_08575 PE=4 SV=1	57.1401	12013000
50	G.QQPAVVENWLV.L		641.843	2	1282.68	1282.68	-0.6	101	62.02	>tr|A0A6P2AXS1|A0A6P2AXS1_9CYAN Uncharacterized protein OS=Spirulina sp. DLM2.Bin59 OX=2480215 GN=EA366_00700 PE=4 SV=1	42.5073	11542000
51	A.IFQPH.R		321.173	2	641.34	641.341	-1.5	113	249.47	>tr|A0A6P2AUY4|A0A6P2AUY4_9CYAN UDP-N-acetylmuramate--L-alanine ligase (Fragment) OS=Spirulina sp. DLM2.Bin59 OX=2480215 GN=EA366_05945 PE=4 SV=1	22.9842	10494000
52	-.QPQETPPPPGQ.E		588.289	2	1175.57	1175.57	1.5	1	104.33	>tr|A0A6P2AYJ9|A0A6P2AYJ9_9CYAN DUF3086 domain-containing protein (Fragment) OS=Spirulina sp. DLM2.Bin59 OX=2480215 GN=EA366_01115 PE=4 SV=1	25.6918	10411000
53	P.VTNHQY.Q		381.189	2	761.371	761.358	17.5	204	117.57	>tr|A0A6P2ATF0|A0A6P2ATF0_9CYAN Ergothioneine biosynthesis protein EgtB (Fragment) OS=Spirulina sp. DLM2.Bin59 OX=2480215 GN=EA366_11945 PE=4 SV=1	25.0763	10256000
54	L.RGKRKPYFTPH.M		693.894	2	1386.78	1386.78	4.1	38	12.03	>tr|A0A6P2AL27|A0A6P2AL27_9CYAN 50S ribosomal protein L13 OS=Spirulina sp. DLM2.Bin59 OX=2480215 GN=rplM PE=3 SV=1	31.6126	10239000
55	R.PLGTLDPQ.D		840.456	1	840.456	840.446	12	125	81.08	>tr|A0A6P2AWS1|A0A6P2AWS1_9CYAN Glycosyltransferase OS=Spirulina sp. DLM2.Bin59 OX=2480215 GN=EA366_06135 PE=4 SV=1	28.9265	9725200
56	Q.LTY.P		396.213	1	396.213	396.213	0.9	297	235.17	>tr|A0A6P2AX54|A0A6P2AX54_9CYAN DUF3854 domain-containing protein OS=Spirulina sp. DLM2.Bin59 OX=2480215 GN=EA366_04245 PE=4 SV=1	27.1478	9694700
57	N.LTFFYT.P		396.205	2	791.402	791.397	5.9	160	121.95	>tr|A0A6P2AQ84|A0A6P2AQ84_9CYAN Uncharacterized protein OS=Spirulina sp. DLM2.Bin59 OX=2480215 GN=EA366_13855 PE=4 SV=1	27.654	9694700
58	M.QPQPM[+15.995]NELIQQ.Q	M[+16]	671.332	2	1341.66	1341.65	7.4	410	82.81	>tr|A0A6P2AYR4|A0A6P2AYR4_9CYAN ABC transporter substrate-binding protein OS=Spirulina sp. DLM2.Bin59 OX=2480215 GN=EA366_04995 PE=4 SV=1	49.502	9686500
59	Y.QPQLAVNSWQQGG.R		706.851	2	1412.69	1412.69	1.5	652	19.04	>tr|A0A6P2AUN5|A0A6P2AUN5_9CYAN CHASE2 domain-containing protein OS=Spirulina sp. DLM2.Bin59 OX=2480215 GN=EA366_09530 PE=4 SV=1	43.464	9387700
60	W.QPQYSFTASLDR.S		706.85	2	1412.69	1412.68	8.6	314	14.05	>tr|A0A6P2AVC7|A0A6P2AVC7_9CYAN NAD-dependent epimerase/dehydratase family protein OS=Spirulina sp. DLM2.Bin59 OX=2480215 GN=EA366_10655 PE=4 SV=1	42.9561	9387700
61	V.KDQAHRWQMVN.N		706.85	2	1412.69	1412.69	5.4	222	9.04	>tr|A0A6P2AYZ3|A0A6P2AYZ3_9CYAN GAF domain-containing protein (Fragment) OS=Spirulina sp. DLM2.Bin59 OX=2480215 GN=EA366_00340 PE=4 SV=1	44.9912	9387700
62	N.AATFDRANLDVGY.H		706.851	2	1412.69	1412.68	9.5	510	5.17	>tr|A0A6P2AQV2|A0A6P2AQV2_9CYAN SLH domain-containing protein OS=Spirulina sp. DLM2.Bin59 OX=2480215 GN=EA366_11830 PE=3 SV=1	43.9735	9387700
63	R.TVLTFC[+57.021]TNDVLGM.V	C[+57]	735.843	2	1470.68	1470.7	-12.6	43	44.02	>tr|A0A6P2AYV2|A0A6P2AYV2_9CYAN Aminotransferase class I/II-fold pyridoxal phosphate-dependent enzyme OS=Spirulina sp. DLM2.Bin59 OX=2480215 GN=EA366_02010 PE=4 SV=1	20.7985	8867100
64	H.PQIPHLLAYFE.E		664.355	2	1327.7	1327.7	-0.9	79	54.06	>tr|A0A6P2AHP8|A0A6P2AHP8_9CYAN Serine/threonine protein kinase OS=Spirulina sp. DLM2.Bin59 OX=2480215 GN=EA366_15520 PE=4 SV=1	59.9244	8835500
65	A.LAQHFRHLNPR.L		694.9	2	1388.79	1388.77	19.2	267	40.48	>tr|A0A6P2AY19|A0A6P2AY19_9CYAN Alpha/beta fold hydrolase OS=Spirulina sp. DLM2.Bin59 OX=2480215 GN=EA366_03590 PE=4 SV=1	44.7967	8617200
66	T.AIADAEFLINGPR.P		693.878	2	1386.75	1386.74	7.8	55	24.32	>tr|A0A6P2AUS8|A0A6P2AUS8_9CYAN UPF0284 protein EA366_07800 OS=Spirulina sp. DLM2.Bin59 OX=2480215 GN=EA366_07800 PE=3 SV=1	44.7967	8617200
67	A.DKPDITH.V		825.396	1	825.396	825.41	-17.4	111	8.33	>tr|A0A6P2AXP7|A0A6P2AXP7_9CYAN Uncharacterized protein OS=Spirulina sp. DLM2.Bin59 OX=2480215 GN=EA366_04720 PE=4 SV=1	41.9719	8552300
68	T.PIPFNT.G		688.365	1	688.365	688.366	-1.8	307	207.74	>tr|A0A6P2APR0|A0A6P2APR0_9CYAN SagB/ThcOx family dehydrogenase OS=Spirulina sp. DLM2.Bin59 OX=2480215 GN=EA366_12445 PE=4 SV=1	42.7805	8376300
69	D.QPELPPLETAEPT.S		711.36	2	1421.71	1421.72	-1.6	750	6.18	>tr|A0A6P2AN13|A0A6P2AN13_9CYAN Valine--tRNA ligase OS=Spirulina sp. DLM2.Bin59 OX=2480215 GN=valS PE=3 SV=1	39.5665	8170700
70	L.LNVQQALGDR.L		557.306	2	1113.6	1113.6	2.5	155	31.03	>tr|A0A6P2AXR4|A0A6P2AXR4_9CYAN Phosphotransacetylase family protein OS=Spirulina sp. DLM2.Bin59 OX=2480215 GN=EA366_08510 PE=4 SV=1	24.3115	8149400
71	P.EFEPEVLAVR.V		594.818	2	1188.63	1188.63	1.7	397	10.87	>tr|A0A6P2AXE5|A0A6P2AXE5_9CYAN Coproporphyrinogen III oxidase OS=Spirulina sp. DLM2.Bin59 OX=2480215 GN=hemG PE=3 SV=1	25.9765	8049400
72	V.EVPENF.L		734.345	1	734.345	734.336	12.8	607	9.13	>tr|A0A6P2AYM4|A0A6P2AYM4_9CYAN Elongation factor G OS=Spirulina sp. DLM2.Bin59 OX=2480215 GN=fusA PE=3 SV=1	21.3036	8017800
73	V.LDATGTPYYANER.A		735.842	2	1470.68	1470.69	-6.5	390	2.87	>tr|A0A6P2ASB8|A0A6P2ASB8_9CYAN PAS domain-containing protein OS=Spirulina sp. DLM2.Bin59 OX=2480215 GN=EA366_10955 PE=4 SV=1	21.8115	8017800
74	L.YLPYP.R		652.333	1	652.333	652.334	-2.3	118	78.85	>tr|A0A6P2AW40|A0A6P2AW40_9CYAN Pilus assembly protein PilM OS=Spirulina sp. DLM2.Bin59 OX=2480215 GN=EA366_10020 PE=4 SV=1	40.8737	8006500
75	M.YGY.D		402.166	1	402.166	402.166	-1.2	1094	92.59	>tr|A0A6P2AY18|A0A6P2AY18_9CYAN PAS domain S-box protein (Fragment) OS=Spirulina sp. DLM2.Bin59 OX=2480215 GN=EA366_04135 PE=3 SV=1	26.1643	7969500
76	S.QPLYSAIAPW.S		573.302	2	1145.6	1145.6	-2.6	319	157.85	>tr|A0A6P2AYK1|A0A6P2AYK1_9CYAN UvrABC system protein A OS=Spirulina sp. DLM2.Bin59 OX=2480215 GN=uvrA PE=3 SV=1	40.9984	7803700
77	P.LPYQTGKNPGA.L		573.301	2	1145.59	1145.59	0	341	142.09	>tr|A0A6P2AZ57|A0A6P2AZ57_9CYAN Glycerol-3-phosphate dehydrogenase OS=Spirulina sp. DLM2.Bin59 OX=2480215 GN=EA366_00695 PE=3 SV=1	41.5072	7803700
78	N.FFGTT.R		572.27	1	572.27	572.271	-2.1	677	41.7	>tr|A0A6P2AW05|A0A6P2AW05_9CYAN Cation-transporting P-type ATPase (Fragment) OS=Spirulina sp. DLM2.Bin59 OX=2480215 GN=EA366_06205 PE=4 SV=1	42.1281	7803700
79	V.QSILPH.A		347.697	2	694.387	694.388	-2.3	49	200.32	>tr|A0A6P2AZ32|A0A6P2AZ32_9CYAN SGNH_hydro domain-containing protein (Fragment) OS=Spirulina sp. DLM2.Bin59 OX=2480215 GN=EA366_00140 PE=4 SV=1	30.804	7723100
80	N.SGVSPHGM[+15.995]ELTPR.S	M[+16]	692.351	2	1383.7	1383.67	19.6	660	55	>tr|A0A6P2AM33|A0A6P2AM33_9CYAN Flavin-dependent dehydrogenase OS=Spirulina sp. DLM2.Bin59 OX=2480215 GN=EA366_12625 PE=4 SV=1	20.5773	7645100
81	E.NAAEGIFQTTTDGRY.I		822.393	2	1643.78	1643.77	7.1	1069	52.97	>tr|A0A6P2AY18|A0A6P2AY18_9CYAN PAS domain S-box protein (Fragment) OS=Spirulina sp. DLM2.Bin59 OX=2480215 GN=EA366_04135 PE=3 SV=1	43.6373	7432000
82	G.PFPALGGY.T		821.412	1	821.412	821.419	-8.9	108	45.26	>tr|A0A6P2AZB5|A0A6P2AZB5_9CYAN DUF11 domain-containing protein (Fragment) OS=Spirulina sp. DLM2.Bin59 OX=2480215 GN=EA366_01230 PE=4 SV=1	44.1411	7432000
83	E.AGFL.S		407.228	1	407.228	407.229	-1.4	214	149.14	>tr|A0A6P2ALP3|A0A6P2ALP3_9CYAN Coproporphyrinogen-III oxidase OS=Spirulina sp. DLM2.Bin59 OX=2480215 GN=hemN PE=3 SV=1	41.4596	7383400
84	I.GAFI.Y		407.228	1	407.228	407.229	-1.4	224	149.14	>tr|A0A6P2AYU5|A0A6P2AYU5_9CYAN Uncharacterized protein OS=Spirulina sp. DLM2.Bin59 OX=2480215 GN=EA366_07310 PE=4 SV=1	41.4596	7383400
85	Q.PFAAQAQTVNQDLF.D		775.38	2	1549.75	1549.76	-7.4	25	74.81	>tr|A0A6P2AQV2|A0A6P2AQV2_9CYAN SLH domain-containing protein OS=Spirulina sp. DLM2.Bin59 OX=2480215 GN=EA366_11830 PE=3 SV=1	51.8893	7383400
86	S.AGEAVAWL.K		408.716	2	816.424	816.425	-1.2	322	66.7	>tr|A0A6P2ANL6|A0A6P2ANL6_9CYAN PBSX family phage terminase large subunit OS=Spirulina sp. DLM2.Bin59 OX=2480215 GN=EA366_12285 PE=4 SV=1	41.4596	7383400
87	V.QQYPI.N		648.335	1	648.335	648.335	-0.2	241	79.32	>tr|A0A6P2AYL1|A0A6P2AYL1_9CYAN Histidine kinase domain-containing protein OS=Spirulina sp. DLM2.Bin59 OX=2480215 GN=EA366_00710 PE=4 SV=1	37.7347	7240700
88	A.FPVPQ.P		587.32	1	587.32	587.319	2.1	282	149.38	>tr|A0A6P2AYP1|A0A6P2AYP1_9CYAN Uncharacterized protein OS=Spirulina sp. DLM2.Bin59 OX=2480215 GN=EA366_02295 PE=4 SV=1	36.6041	7225100
89	D.QQPPGKRESLY.Y		651.833	2	1302.66	1302.68	-16.7	102	0.66	>tr|A0A6P2AQ56|A0A6P2AQ56_9CYAN TIGR03279 family radical SAM protein OS=Spirulina sp. DLM2.Bin59 OX=2480215 GN=EA366_13910 PE=4 SV=1	35.4152	7217100
90	L.ETTRSQAADLAFAI.K		747.39	2	1493.77	1493.76	8.6	381	52.63	>tr|A0A6P2ASQ3|A0A6P2ASQ3_9CYAN GAF domain-containing protein OS=Spirulina sp. DLM2.Bin59 OX=2480215 GN=EA366_09455 PE=4 SV=1	45.8676	7003600
91	L.QPQTVDFFLVV.L		646.854	2	1292.7	1292.69	9.2	292	38.03	>tr|A0A6P2APX6|A0A6P2APX6_9CYAN Glycosyltransferase OS=Spirulina sp. DLM2.Bin59 OX=2480215 GN=EA366_11920 PE=4 SV=1	46.4162	6829300
92	I.SILIMGYHDP.L		573.284	2	1145.56	1145.57	-5.3	6	139.78	>tr|A0A6P2AV66|A0A6P2AV66_9CYAN Folate-binding protein OS=Spirulina sp. DLM2.Bin59 OX=2480215 GN=EA366_07280 PE=4 SV=1	37.8147	6781200
93	Q.QLAIQ.T		572.342	1	572.342	572.34	2.6	201	115.7	>tr|A0A6P2AR22|A0A6P2AR22_9CYAN Pyrroline-5-carboxylate reductase OS=Spirulina sp. DLM2.Bin59 OX=2480215 GN=proC PE=3 SV=1	36.6192	6781200
94	P.YAFIPTYDR.T		573.284	2	1145.56	1145.56	-2.1	244	107.84	>tr|A0A6P2AY95|A0A6P2AY95_9CYAN YdiU family protein (Fragment) OS=Spirulina sp. DLM2.Bin59 OX=2480215 GN=EA366_02520 PE=3 SV=1	37.1272	6781200
95	P.TNPNQ.F		573.257	1	573.257	573.263	-10.2	4	102.93	>tr|A0A6P2AYP5|A0A6P2AYP5_9CYAN Chaperone protein ClpB OS=Spirulina sp. DLM2.Bin59 OX=2480215 GN=clpB PE=3 SV=1	37.1272	6781200
96	S.QPSLK.A		572.341	1	572.341	572.34	1.3	763	76.55	>tr|A0A6P2ATC2|A0A6P2ATC2_9CYAN Pyruvate-flavodoxin oxidoreductase OS=Spirulina sp. DLM2.Bin59 OX=2480215 GN=nifJ PE=3 SV=1	37.1272	6781200
97	Q.GAIAAGNFPEAQ.A		573.284	2	1145.56	1145.56	1.3	121	63.94	>tr|A0A6P2AZ66|A0A6P2AZ66_9CYAN Co-chaperone YbbN OS=Spirulina sp. DLM2.Bin59 OX=2480215 GN=EA366_01495 PE=4 SV=1	36.6192	6781200
98	G.LQAGNLTTNDT.T		574.284	2	1147.56	1147.56	1.5	247	1.76	>tr|A0A6P2AZP5|A0A6P2AZP5_9CYAN SLH domain-containing protein OS=Spirulina sp. DLM2.Bin59 OX=2480215 GN=EA366_01885 PE=3 SV=1	36.6192	6781200
99	R.PHQFPQ.S		377.187	2	753.367	753.368	-1.5	62	245.79	>tr|A0A6P2AVF1|A0A6P2AVF1_9CYAN ATP-binding protein (Fragment) OS=Spirulina sp. DLM2.Bin59 OX=2480215 GN=EA366_06615 PE=4 SV=1	20.5867	6594000
100	R.LTPQPH.P		346.689	2	692.371	692.373	-2.9	80	227.02	>tr|A0A6P2AM86|A0A6P2AM86_9CYAN YlxR family protein OS=Spirulina sp. DLM2.Bin59 OX=2480215 GN=EA366_15790 PE=4 SV=1	17.2572	6524800
101	L.AATIAWH.R		769.401	1	769.401	769.399	2.2	424	28.7	>tr|A0A6P2B045|A0A6P2B045_9CYAN Peptidase S8 and S53 subtilisin kexin sedolisin OS=Spirulina sp. DLM2.Bin59 OX=2480215 GN=EA366_01150 PE=4 SV=1	41.7036	6408500
102	D.LGIAC[+57.021]HV.A	C[+57]	769.4	1	769.4	769.403	-3.2	296	13.31	>tr|A0A6P2AZV1|A0A6P2AZV1_9CYAN Alanine--glyoxylate aminotransferase family protein OS=Spirulina sp. DLM2.Bin59 OX=2480215 GN=EA366_05735 PE=3 SV=1	40.5186	6408500
103	A.KDLAHSAT.L		842.444	1	842.444	842.437	9.3	670	58.63	>tr|A0A6P2AUT9|A0A6P2AUT9_9CYAN Type 2 lantipeptide synthetase LanM OS=Spirulina sp. DLM2.Bin59 OX=2480215 GN=lanM PE=4 SV=1	34.2156	6368000
104	I.FAELR.A		318.178	2	635.349	635.351	-2.8	98	139.75	>tr|A0A6P2APH0|A0A6P2APH0_9CYAN D-glycero-beta-D-manno-heptose 1-phosphate adenylyltransferase (Fragment) OS=Spirulina sp. DLM2.Bin59 OX=2480215 GN=EA366_12510 PE=4 SV=1	26.0772	6001600
105	A.AATNFF.K		670.317	1	670.317	670.319	-3.3	265	56.61	>tr|A0A6P2AWT9|A0A6P2AWT9_9CYAN Probable septum site-determining protein MinC OS=Spirulina sp. DLM2.Bin59 OX=2480215 GN=minC PE=3 SV=1	36.7707	5915200
106	P.ATASNPQVFQYL.P		669.843	2	1338.68	1338.67	7.5	116	46.86	>tr|A0A6P2AMM2|A0A6P2AMM2_9CYAN HAS-barrel domain-containing protein OS=Spirulina sp. DLM2.Bin59 OX=2480215 GN=EA366_13765 PE=4 SV=1	36.7707	5915200
107	Q.GVSFDLYGRDLP.P		669.842	2	1338.68	1338.67	6.7	192	24.24	>tr|A0A6P2ATD6|A0A6P2ATD6_9CYAN Glycosyltransferase OS=Spirulina sp. DLM2.Bin59 OX=2480215 GN=EA366_08110 PE=3 SV=1	37.2728	5915200
108	G.QQMANAMQPQAA.P		644.798	2	1288.59	1288.58	8.8	273	12.99	>tr|A0A6P2B1C5|A0A6P2B1C5_9CYAN SPFH domain-containing protein (Fragment) OS=Spirulina sp. DLM2.Bin59 OX=2480215 GN=EA366_00170 PE=4 SV=1	19.5732	5725200
109	W.LM[+15.995]LPR.P	M[+16]	323.19	2	645.374	645.375	-2.5	402	198.88	>tr|A0A6P2AUK6|A0A6P2AUK6_9CYAN Uncharacterized protein (Fragment) OS=Spirulina sp. DLM2.Bin59 OX=2480215 GN=EA366_06580 PE=4 SV=1	25.921	5543300
110	S.AGLPLPQ.T		695.418	1	695.418	695.409	13.7	411	49.17	>tr|A0A6P2AJ63|A0A6P2AJ63_9CYAN Long-chain fatty acid--CoA ligase OS=Spirulina sp. DLM2.Bin59 OX=2480215 GN=EA366_14405 PE=4 SV=1	21.3404	5490800
111	E.FNILQ.L		634.356	1	634.356	634.356	0	165	148.97	>tr|A0A6P2ASK5|A0A6P2ASK5_9CYAN Response regulator OS=Spirulina sp. DLM2.Bin59 OX=2480215 GN=EA366_09730 PE=4 SV=1	50.3394	5471300
112	D.QPYVK.D		634.355	1	634.355	634.356	-1.4	204	75.33	>tr|A0A6P2AVZ2|A0A6P2AVZ2_9CYAN Elongation factor Ts OS=Spirulina sp. DLM2.Bin59 OX=2480215 GN=tsf PE=3 SV=1	50.8467	5471300
113	N.KDQYRY.Y		872.422	1	872.422	872.426	-4.2	79	27.63	>tr|A0A6P2AH55|A0A6P2AH55_9CYAN CRISPR system Cms protein Csm4 OS=Spirulina sp. DLM2.Bin59 OX=2480215 GN=csm4 PE=3 SV=1	28.7896	5376200
114	A.FEALR.Q		318.179	2	635.35	635.351	-2	224	206.15	>tr|A0A6P2AJM1|A0A6P2AJM1_9CYAN NUDIX hydrolase OS=Spirulina sp. DLM2.Bin59 OX=2480215 GN=EA366_14320 PE=4 SV=1	25.5835	5274800
115	L.GGAD.A		319.139	1	319.139	319.125	46.1	376	20.56	>tr|A0A6P2AWC5|A0A6P2AWC5_9CYAN CBS domain-containing protein OS=Spirulina sp. DLM2.Bin59 OX=2480215 GN=EA366_03430 PE=4 SV=1	25.5835	5274800
116	Q.KDLFAVGEYWS.G		657.814	2	1314.62	1314.64	-11.6	257	38.17	>tr|A0A6P2AW19|A0A6P2AW19_9CYAN Alpha-amylase OS=Spirulina sp. DLM2.Bin59 OX=2480215 GN=EA366_09060 PE=3 SV=1	35.2521	5184600
117	L.TPNPSFSLTIQ.V		602.805	2	1204.6	1204.62	-15.8	5	73.15	>tr|A0A6P2AZZ1|A0A6P2AZZ1_9CYAN NAD-dependent malic enzyme OS=Spirulina sp. DLM2.Bin59 OX=2480215 GN=EA366_05520 PE=4 SV=1	47.163	5069900
118	L.RSQYDTL.P		882.429	1	882.429	882.432	-2.6	134	55.1	>tr|A0A6P2AM57|A0A6P2AM57_9CYAN Uma2 family endonuclease OS=Spirulina sp. DLM2.Bin59 OX=2480215 GN=EA366_13555 PE=4 SV=1	34.1025	5049500
119	T.KDFQR.R		693.355	1	693.355	693.368	-18.7	170	42.34	>tr|A0A6P2ALJ5|A0A6P2ALJ5_9CYAN Thioredoxin family protein OS=Spirulina sp. DLM2.Bin59 OX=2480215 GN=EA366_13365 PE=4 SV=1	25.7986	4883700
120	M.QWKIT.N		675.378	1	675.378	675.382	-6.9	118	32.23	>tr|A0A6P2AR47|A0A6P2AR47_9CYAN Phage tail protein OS=Spirulina sp. DLM2.Bin59 OX=2480215 GN=EA366_11145 PE=4 SV=1	47.1228	4859200
121	A.RSQGQQTAVFDPQM.A		796.888	2	1592.77	1592.75	12.3	293	23.32	>tr|A0A6P2AZT7|A0A6P2AZT7_9CYAN Glycosyltransferase OS=Spirulina sp. DLM2.Bin59 OX=2480215 GN=EA366_01680 PE=4 SV=1	45.3332	4796000
122	G.AVF.T		336.192	1	336.192	336.192	-0.4	965	81.9	>tr|A0A6P2AX54|A0A6P2AX54_9CYAN DUF3854 domain-containing protein OS=Spirulina sp. DLM2.Bin59 OX=2480215 GN=EA366_04245 PE=4 SV=1	46.0743	4696200
123	V.APF.G		334.176	1	334.176	334.176	-0.6	635	40.93	>tr|A0A6P2AX54|A0A6P2AX54_9CYAN DUF3854 domain-containing protein OS=Spirulina sp. DLM2.Bin59 OX=2480215 GN=EA366_04245 PE=4 SV=1	46.0743	4696200
124	W.YNFLH.D		693.321	1	693.321	693.336	-20.9	54	87	>tr|A0A6P2AL62|A0A6P2AL62_9CYAN Uncharacterized protein OS=Spirulina sp. DLM2.Bin59 OX=2480215 GN=EA366_13690 PE=4 SV=1	44.9756	4622400
125	M.LPWRFPPLILH.H		694.901	2	1388.79	1388.82	-18.7	2	13.73	>tr|A0A6P2AMX1|A0A6P2AMX1_9CYAN ATP-binding protein OS=Spirulina sp. DLM2.Bin59 OX=2480215 GN=EA366_13005 PE=4 SV=1	44.9756	4622400
126	E.QLAGVME.R		747.365	1	747.365	747.371	-8	208	69.1	>tr|A0A6P2ASQ3|A0A6P2ASQ3_9CYAN GAF domain-containing protein OS=Spirulina sp. DLM2.Bin59 OX=2480215 GN=EA366_09455 PE=4 SV=1	53.4961	4510600
127	I.AGELEFPLPAN.G		579.293	2	1157.58	1157.58	-5.1	218	4.3	>tr|A0A6P2AXR7|A0A6P2AXR7_9CYAN Phosphodiester glycosidase family protein OS=Spirulina sp. DLM2.Bin59 OX=2480215 GN=EA366_06875 PE=4 SV=1	52.1029	4508800
128	W.AATGIGILT.L		408.739	2	816.471	816.482	-14.2	171	133.28	>tr|A0A6P2ARS6|A0A6P2ARS6_9CYAN SulP family inorganic anion transporter OS=Spirulina sp. DLM2.Bin59 OX=2480215 GN=EA366_11330 PE=3 SV=1	29.9455	4373000
129	L.QPFVD.Q		605.29	1	605.29	605.293	-4	169	90.26	>tr|A0A6P2AXM4|A0A6P2AXM4_9CYAN Aminomethyltransferase OS=Spirulina sp. DLM2.Bin59 OX=2480215 GN=gcvT PE=3 SV=1	38.0622	4353800
130	R.QPQFS.M		606.288	1	606.288	606.288	0.2	168	72.5	>tr|A0A6P2AJG6|A0A6P2AJG6_9CYAN Tetratricopeptide repeat protein OS=Spirulina sp. DLM2.Bin59 OX=2480215 GN=EA366_15810 PE=4 SV=1	39.0798	4353800
131	A.AGKDPQPFDFS.I		604.789	2	1208.57	1208.56	9.9	444	48.72	>tr|A0A6P2AM10|A0A6P2AM10_9CYAN DUF4070 domain-containing protein OS=Spirulina sp. DLM2.Bin59 OX=2480215 GN=EA366_12775 PE=4 SV=1	38.5771	4353800
132	D.PQQEFTGTSLT.F		604.789	2	1208.57	1208.58	-7	159	31.56	>tr|A0A6P2B0L2|A0A6P2B0L2_9CYAN DNA gyrase subunit B OS=Spirulina sp. DLM2.Bin59 OX=2480215 GN=gyrB PE=3 SV=1	38.0622	4353800
133	I.VNWQLQ.T		787.407	1	787.407	787.41	-2.9	141	72.03	>tr|A0A6P2AYN7|A0A6P2AYN7_9CYAN Uma2 family endonuclease OS=Spirulina sp. DLM2.Bin59 OX=2480215 GN=EA366_00955 PE=4 SV=1	41.741	4243800
134	A.AATTSGPSGFNFTAA.S		700.328	2	1399.65	1399.65	0.2	73	68.3	>tr|A0A6P2ANZ2|A0A6P2ANZ2_9CYAN PEP-CTERM sorting domain-containing protein OS=Spirulina sp. DLM2.Bin59 OX=2480215 GN=EA366_12845 PE=4 SV=1	41.1301	4240300
135	S.TAAAFGY.G		700.326	1	700.326	700.33	-5.5	7	35.28	>tr|A0A6P2AZC2|A0A6P2AZC2_9CYAN Hsp70 family protein (Fragment) OS=Spirulina sp. DLM2.Bin59 OX=2480215 GN=EA366_00360 PE=4 SV=1	40.5617	4240300
136	G.QPQQLDWVYRS.T		710.353	2	1419.7	1419.7	-1.7	138	12.8	>tr|A0A6P2AX08|A0A6P2AX08_9CYAN Sensor histidine kinase OS=Spirulina sp. DLM2.Bin59 OX=2480215 GN=EA366_02645 PE=4 SV=1	32.0852	4224700
137	Y.QQPTAFFANTFPT.D		735.361	2	1469.71	1469.71	5.5	42	19.28	>tr|A0A6P2AWZ2|A0A6P2AWZ2_9CYAN ATP-binding protein OS=Spirulina sp. DLM2.Bin59 OX=2480215 GN=EA366_03660 PE=4 SV=1	49.3088	4124800
138	T.TAAFLTI.D		736.431	1	736.431	736.424	9.2	13	17.13	>tr|A0A6P2AYY5|A0A6P2AYY5_9CYAN ATP-binding cassette domain-containing protein OS=Spirulina sp. DLM2.Bin59 OX=2480215 GN=EA366_04630 PE=3 SV=1	48.8009	4124800
139	V.QPQII.A		598.356	1	598.356	598.356	-0.3	55	156.47	>tr|A0A6P2AXI3|A0A6P2AXI3_9CYAN CelD_N domain-containing protein OS=Spirulina sp. DLM2.Bin59 OX=2480215 GN=EA366_01805 PE=4 SV=1	32.2595	4092800
140	M.QLMVQQLGGQV.E		600.834	2	1200.66	1200.64	17.3	107	74.32	>tr|A0A6P2AU89|A0A6P2AU89_9CYAN GMP synthase [glutamine-hydrolyzing] OS=Spirulina sp. DLM2.Bin59 OX=2480215 GN=guaA PE=3 SV=1	32.2595	4092800
141	G.LFGLGPQ.G		366.202	2	731.396	731.409	-17.5	135	60.88	>tr|A0A6P2AVS2|A0A6P2AVS2_9CYAN Aminotransferase class V-fold PLP-dependent enzyme OS=Spirulina sp. DLM2.Bin59 OX=2480215 GN=EA366_10300 PE=3 SV=1	34.5955	4083800
142	I.SYQII.V		623.34	1	623.34	623.34	0.2	757	119.62	>tr|A0A6P2AYA9|A0A6P2AYA9_9CYAN GAF domain-containing protein OS=Spirulina sp. DLM2.Bin59 OX=2480215 GN=EA366_05925 PE=4 SV=1	47.7864	4009800
143	G.YYFSP.A		676.292	1	676.292	676.298	-8.7	710	54.06	>tr|A0A6P2APD3|A0A6P2APD3_9CYAN EAL domain-containing protein OS=Spirulina sp. DLM2.Bin59 OX=2480215 GN=EA366_12615 PE=4 SV=1	39.9075	3934900
144	A.PFYFDWLQHP.H		675.325	2	1349.64	1349.63	8.2	196	31.98	>tr|A0A6P2AXU2|A0A6P2AXU2_9CYAN CocE/NonD family hydrolase (Fragment) OS=Spirulina sp. DLM2.Bin59 OX=2480215 GN=EA366_02145 PE=4 SV=1	39.9075	3934900
145	P.QAVAPVPQ.T		405.229	2	809.451	809.452	-0.3	963	26.75	>tr|A0A6P2AMW9|A0A6P2AMW9_9CYAN Histidine kinase OS=Spirulina sp. DLM2.Bin59 OX=2480215 GN=EA366_15295 PE=4 SV=1	30.2114	3828600
146	G.QPY.R		407.204	1	407.204	407.192	29.2	1310	68.58	>tr|A0A6P2AY18|A0A6P2AY18_9CYAN PAS domain S-box protein (Fragment) OS=Spirulina sp. DLM2.Bin59 OX=2480215 GN=EA366_04135 PE=3 SV=1	29.2698	3804100
147	A.QALSDGPQ.S		408.206	2	815.405	815.389	19.7	313	65.95	>tr|A0A6P2AXC1|A0A6P2AXC1_9CYAN 3-deoxy-7-phosphoheptulonate synthase OS=Spirulina sp. DLM2.Bin59 OX=2480215 GN=aroF PE=4 SV=1	29.2698	3804100
148	T.VKLSDYR.G		440.748	2	880.49	880.489	1.1	29	17.7	>tr|A0A6P2AWV1|A0A6P2AWV1_9CYAN Peroxiredoxin OS=Spirulina sp. DLM2.Bin59 OX=2480215 GN=EA366_04025 PE=3 SV=1	26.0282	3799900
149	A.TAAQLEAPAEST.Q		594.788	2	1188.57	1188.57	-5	390	23.51	>tr|A0A6P2AV22|A0A6P2AV22_9CYAN Uncharacterized protein OS=Spirulina sp. DLM2.Bin59 OX=2480215 GN=EA366_07025 PE=4 SV=1	41.2098	3787000
150	L.LDAYPNR.V		424.717	2	848.428	848.426	1.6	125	114.14	>tr|A0A6P2AHJ4|A0A6P2AHJ4_9CYAN Phosphoribosylglycinamide formyltransferase OS=Spirulina sp. DLM2.Bin59 OX=2480215 GN=purN PE=3 SV=1	23.9737	3678900
151	F.APFAS.P		492.246	1	492.246	492.245	2	415	253.5	>tr|A0A6P2AXP4|A0A6P2AXP4_9CYAN 16S rRNA m5C967 methyltransferase OS=Spirulina sp. DLM2.Bin59 OX=2480215 GN=EA366_08580 PE=3 SV=1	24.8709	3507700
152	D.PAAFAQQYS.S		491.742	2	982.477	982.463	14.7	222	103.92	>tr|A0A6P2AMX0|A0A6P2AMX0_9CYAN Mg-protoporphyrin IX chelatase (Fragment) OS=Spirulina sp. DLM2.Bin59 OX=2480215 GN=EA366_14245 PE=3 SV=1	24.3644	3507700
153	D.LSSAERRQV.H		523.286	2	1045.56	1045.57	-9.8	121	124.66	>tr|A0A6P2AIU6|A0A6P2AIU6_9CYAN RNA-binding protein OS=Spirulina sp. DLM2.Bin59 OX=2480215 GN=EA366_14880 PE=4 SV=1	26.0681	3478400
154	S.SM[+15.995]PILR.E	M[+16]	366.707	2	732.406	732.407	-1.7	207	94.84	>tr|A0A6P2AI35|A0A6P2AI35_9CYAN AAA_31 domain-containing protein OS=Spirulina sp. DLM2.Bin59 OX=2480215 GN=EA366_16225 PE=4 SV=1	26.3358	3451100
155	M.TGLLLDT.S		366.707	2	732.406	732.414	-10.2	743	51.14	>tr|A0A6P2AW48|A0A6P2AW48_9CYAN PAS domain-containing hybrid sensor histidine kinase/response regulator OS=Spirulina sp. DLM2.Bin59 OX=2480215 GN=EA366_08980 PE=4 SV=1	25.8267	3451100
156	T.THAIQGF.E		387.2	2	773.393	773.394	-0.8	134	50.09	>tr|A0A6P2AW76|A0A6P2AW76_9CYAN EAL domain-containing protein OS=Spirulina sp. DLM2.Bin59 OX=2480215 GN=EA366_07270 PE=4 SV=1	28.7387	3407300
157	K.AGQVIQEDGPQ.T		571.284	2	1141.56	1141.55	10.7	75	42.58	>tr|A0A6P2B1H3|A0A6P2B1H3_9CYAN Phospho-N-acetylmuramoyl-pentapeptide-transferase OS=Spirulina sp. DLM2.Bin59 OX=2480215 GN=mraY PE=3 SV=1	18.1336	3173400
158	N.GLETFYFSPQ.G		594.789	2	1188.57	1188.56	10.7	92	10.75	>tr|A0A6P2AVZ1|A0A6P2AVZ1_9CYAN N-acetylmuramoyl-L-alanine amidase (Fragment) OS=Spirulina sp. DLM2.Bin59 OX=2480215 GN=EA366_10140 PE=4 SV=1	39.1733	3152000
159	W.GSVAGPFRFVR.W		596.839	2	1192.67	1192.66	10.2	176	11.46	>tr|A0A6P2AYU4|A0A6P2AYU4_9CYAN Chromophore lyase CpcT/CpeT OS=Spirulina sp. DLM2.Bin59 OX=2480215 GN=cpcT PE=3 SV=1	43.4654	3144600
160	G.LGALGLYFGER.W		598.329	2	1195.65	1195.65	2.5	69	9.77	>tr|A0A6P2AK47|A0A6P2AK47_9CYAN Peptide chain release factor 1 OS=Spirulina sp. DLM2.Bin59 OX=2480215 GN=EA366_15285 PE=4 SV=1	43.9761	3144600
161	I.FYWVSRPQ.P		541.768	2	1082.53	1082.54	-11.3	555	61.55	>tr|A0A6P2AXC6|A0A6P2AXC6_9CYAN Phosphate ABC transporter permease PstA OS=Spirulina sp. DLM2.Bin59 OX=2480215 GN=pstA PE=3 SV=1	26.0131	3107500
162	L.LNIYQYRSK.T		592.827	2	1184.65	1184.64	4.6	72	52.48	>tr|A0A6P2AVP5|A0A6P2AVP5_9CYAN Uncharacterized protein OS=Spirulina sp. DLM2.Bin59 OX=2480215 GN=EA366_07635 PE=4 SV=1	35.4176	2953900
163	I.QQPKGWVYGEF.L		669.838	2	1338.67	1338.65	15.3	113	5.35	>tr|A0A6P2AJH4|A0A6P2AJH4_9CYAN SH3 domain-containing protein (Fragment) OS=Spirulina sp. DLM2.Bin59 OX=2480215 GN=EA366_15760 PE=4 SV=1	51.8456	2923500
164	A.IQAQQ.P		587.308	1	587.308	587.315	-11	408	92.99	>tr|A0A6P2AUG6|A0A6P2AUG6_9CYAN EAL domain-containing protein OS=Spirulina sp. DLM2.Bin59 OX=2480215 GN=EA366_08150 PE=4 SV=1	28.375	2911300
165	G.LTEPQ.A		587.309	1	587.309	587.303	9.4	370	45.8	>tr|A0A6P2AHZ5|A0A6P2AHZ5_9CYAN Dihydrolipoyl dehydrogenase OS=Spirulina sp. DLM2.Bin59 OX=2480215 GN=lpdA PE=3 SV=1	28.9113	2911300
166	A.LSVLR.E		587.389	1	587.389	587.388	1.9	486	44.05	>tr|A0A6P2AS64|A0A6P2AS64_9CYAN DNA helicase (Fragment) OS=Spirulina sp. DLM2.Bin59 OX=2480215 GN=EA366_10340 PE=4 SV=1	28.375	2911300
167	A.SDASLAPYHVD.R		587.778	2	1174.55	1174.54	9.9	130	1.72	>tr|A0A6P2AZL9|A0A6P2AZL9_9CYAN Metal-dependent phosphohydrolase OS=Spirulina sp. DLM2.Bin59 OX=2480215 GN=EA366_03360 PE=4 SV=1	28.375	2911300
168	K.PFPQVNI.Q		814.44	1	814.44	814.446	-6.9	213	1.47	>tr|A0A6P2AY71|A0A6P2AY71_9CYAN PD-(D/E)XK nuclease family protein OS=Spirulina sp. DLM2.Bin59 OX=2480215 GN=EA366_03290 PE=4 SV=1	52.6188	2902300
169	I.VNWQL.Q		659.352	1	659.352	659.351	2.1	141	32.62	>tr|A0A6P2AYN7|A0A6P2AYN7_9CYAN Uma2 family endonuclease OS=Spirulina sp. DLM2.Bin59 OX=2480215 GN=EA366_00955 PE=4 SV=1	44.0055	2851400
170	V.AATPQDT.P		703.341	1	703.341	703.326	21.4	70	33.87	>tr|A0A6P2AQ48|A0A6P2AQ48_9CYAN Uncharacterized protein OS=Spirulina sp. DLM2.Bin59 OX=2480215 GN=EA366_11120 PE=4 SV=1	50.0176	2676300
171	I.PQQPFS.R		703.342	1	703.342	703.341	1.3	137	31.36	>tr|A0A6P2AVJ2|A0A6P2AVJ2_9CYAN PAS domain S-box protein OS=Spirulina sp. DLM2.Bin59 OX=2480215 GN=EA366_04855 PE=4 SV=1	47.9804	2676300
172	I.AATQTQTQTLLND.K		702.845	2	1404.68	1404.7	-9.4	628	30.47	>tr|A0A6P2ATM4|A0A6P2ATM4_9CYAN CHAT domain-containing protein (Fragment) OS=Spirulina sp. DLM2.Bin59 OX=2480215 GN=EA366_11740 PE=4 SV=1	49.5035	2676300
173	T.LWQSGDLLPQ.W		578.81	2	1156.61	1156.6	11.7	32	5.69	>tr|A0A6P2AW49|A0A6P2AW49_9CYAN Carbohydrate kinase (Fragment) OS=Spirulina sp. DLM2.Bin59 OX=2480215 GN=EA366_08020 PE=4 SV=1	43.0422	2658900
174	Q.TAAPQFPN.R		845.413	1	845.413	845.415	-2.3	140	45.63	>tr|A0A6P2AQX5|A0A6P2AQX5_9CYAN DUF3685 domain-containing protein OS=Spirulina sp. DLM2.Bin59 OX=2480215 GN=EA366_11010 PE=4 SV=1	28.5494	2609800
175	H.SRFNYRFP.D		543.784	2	1086.56	1086.55	12.2	123	62.05	>tr|A0A6P2AVC8|A0A6P2AVC8_9CYAN Bidirectional hydrogenase complex protein HoxU OS=Spirulina sp. DLM2.Bin59 OX=2480215 GN=hoxU PE=4 SV=1	52.4711	2524400
176	S.GALGPGLGNSML.A		543.785	2	1086.56	1086.56	1.3	159	24.42	>tr|A0A6P2B094|A0A6P2B094_9CYAN ABC transporter permease OS=Spirulina sp. DLM2.Bin59 OX=2480215 GN=EA366_04985 PE=3 SV=1	50.9509	2524400
177	D.HLFLLP.Q		739.449	1	739.449	739.45	-1.9	18	121.28	>tr|A0A6P2AUL4|A0A6P2AUL4_9CYAN DUF3368 domain-containing protein OS=Spirulina sp. DLM2.Bin59 OX=2480215 GN=EA366_09145 PE=4 SV=1	59.5683	2436100
178	R.HLEQIVGLQTDQP.L		739.375	2	1477.74	1477.76	-14.3	102	21.24	>tr|A0A6P2AVR9|A0A6P2AVR9_9CYAN Formate C-acetyltransferase OS=Spirulina sp. DLM2.Bin59 OX=2480215 GN=pflB PE=3 SV=1	59.5683	2436100
179	M.QPQAAPP.P		708.354	1	708.354	708.367	-19.8	280	7.11	>tr|A0A6P2B1C5|A0A6P2B1C5_9CYAN SPFH domain-containing protein (Fragment) OS=Spirulina sp. DLM2.Bin59 OX=2480215 GN=EA366_00170 PE=4 SV=1	40.6814	2420100
180	Y.QQQNNTV.G		831.399	1	831.399	831.395	3.6	352	47.08	>tr|A0A6P2AUJ1|A0A6P2AUJ1_9CYAN Tetratricopeptide repeat protein OS=Spirulina sp. DLM2.Bin59 OX=2480215 GN=EA366_06605 PE=4 SV=1	38.933	2412600
181	S.AATGTC[+57.021].V	C[+57]	580.24	1	580.24	580.24	0.3	273	88.56	>tr|A0A6P2AXF3|A0A6P2AXF3_9CYAN Uncharacterized protein OS=Spirulina sp. DLM2.Bin59 OX=2480215 GN=EA366_06110 PE=4 SV=1	44.1425	2383900
182	R.QIPDNRFLVG.L		579.817	2	1158.63	1158.63	1	422	87.29	>tr|A0A6P2APZ7|A0A6P2APZ7_9CYAN ShlB/FhaC/HecB family hemolysin secretion/activation protein (Fragment) OS=Spirulina sp. DLM2.Bin59 OX=2480215 GN=EA366_11455 PE=4 SV=1	43.5477	2383900
183	L.TRTYGVPL.L		906.502	1	906.502	906.504	-2.3	676	22.19	>tr|A0A6P2ASB8|A0A6P2ASB8_9CYAN PAS domain-containing protein OS=Spirulina sp. DLM2.Bin59 OX=2480215 GN=EA366_10955 PE=4 SV=1	33.5024	2359200
184	L.TAASGVAGLQ.L		874.465	1	874.465	874.463	2.2	33	11.55	>tr|A0A6P2B2V0|A0A6P2B2V0_9CYAN Response regulator OS=Spirulina sp. DLM2.Bin59 OX=2480215 GN=EA366_00615 PE=4 SV=1	33.8603	2325200
185	R.PQQMSLGPL.E		970.503	1	970.503	970.503	0.1	7	0.5	>tr|A0A6P2ATF7|A0A6P2ATF7_9CYAN CopY family transcriptional regulator OS=Spirulina sp. DLM2.Bin59 OX=2480215 GN=EA366_08050 PE=3 SV=1	35.5997	2274300
186	I.LHSFP.W		600.303	1	600.303	600.314	-18.8	68	14.88	>tr|A0A6P2APE9|A0A6P2APE9_9CYAN Glucosylglycerol-phosphate synthase (Fragment) OS=Spirulina sp. DLM2.Bin59 OX=2480215 GN=ggpS PE=3 SV=1	52.8429	2207900
187	L.QQPLNALLLVAF.L		663.894	2	1326.78	1326.78	2.6	164	20.46	>tr|A0A6P2AW53|A0A6P2AW53_9CYAN NAD(P)(+) transhydrogenase (Re/Si-specific) subunit beta (Fragment) OS=Spirulina sp. DLM2.Bin59 OX=2480215 GN=EA366_04180 PE=4 SV=1	57.7803	2197700
188	E.PQRQDGPIATPF.P		663.847	2	1326.69	1326.68	5.5	36	0.25	>tr|A0A6P2ARZ0|A0A6P2ARZ0_9CYAN Uncharacterized protein OS=Spirulina sp. DLM2.Bin59 OX=2480215 GN=EA366_11170 PE=4 SV=1	57.2771	2197700
189	K.AAGPGPH.M		606.288	1	606.288	606.299	-18	87	2.89	>tr|A0A6P2B2H0|A0A6P2B2H0_9CYAN NADP(H)-dependent aldo-keto reductase OS=Spirulina sp. DLM2.Bin59 OX=2480215 GN=tas PE=4 SV=1	38.7131	2172700
190	I.NLIHFAGQRQ.Q		592.31	2	1183.61	1183.63	-17.1	347	30.14	>tr|A0A6P2AWQ0|A0A6P2AWQ0_9CYAN Uncharacterized protein (Fragment) OS=Spirulina sp. DLM2.Bin59 OX=2480215 GN=EA366_06565 PE=4 SV=1	34.8256	2057900
191	L.DKPIHTQDLL.K		590.313	2	1179.62	1179.64	-14.9	167	44.62	>tr|A0A6P2ANQ6|A0A6P2ANQ6_9CYAN Hybrid sensor histidine kinase/response regulator (Fragment) OS=Spirulina sp. DLM2.Bin59 OX=2480215 GN=EA366_11745 PE=4 SV=1	42.0577	1989400
192	L.AATPPLSQ.G		784.415	1	784.415	784.42	-6.7	209	43.53	>tr|A0A6P2AX45|A0A6P2AX45_9CYAN GAF domain-containing protein OS=Spirulina sp. DLM2.Bin59 OX=2480215 GN=EA366_02000 PE=4 SV=1	43.7893	1944600
193	I.KDFFLNYEAYTR.D		783.887	2	1566.77	1566.76	4.7	61	13.55	>tr|A0A6P2AUN9|A0A6P2AUN9_9CYAN Glucose-1-phosphate cytidylyltransferase OS=Spirulina sp. DLM2.Bin59 OX=2480215 GN=rfbF PE=4 SV=1	44.2928	1944600
194	W.SPVYTY.A		729.344	1	729.344	729.345	-1.6	176	15.36	>tr|A0A6P2AX65|A0A6P2AX65_9CYAN HAMP domain-containing protein OS=Spirulina sp. DLM2.Bin59 OX=2480215 GN=EA366_06570 PE=4 SV=1	33.2802	1892300
195	I.TFTGF.W		572.269	1	572.269	572.271	-3.6	22	124.11	>tr|A0A6P2B350|A0A6P2B350_9CYAN DUF1092 family protein (Fragment) OS=Spirulina sp. DLM2.Bin59 OX=2480215 GN=EA366_00100 PE=4 SV=1	42.48	1881700
196	E.EFEF.I		571.241	1	571.241	571.24	1.5	281	46.29	>tr|A0A6P2AZR5|A0A6P2AZR5_9CYAN GHKL domain-containing protein OS=Spirulina sp. DLM2.Bin59 OX=2480215 GN=EA366_01785 PE=4 SV=1	42.48	1881700
197	F.MDKPF.E		637.295	1	637.295	637.301	-10.2	372	10.58	>tr|A0A6P2AWS2|A0A6P2AWS2_9CYAN AarF/ABC1/UbiB kinase family protein OS=Spirulina sp. DLM2.Bin59 OX=2480215 GN=EA366_06515 PE=4 SV=1	60.265	1837800
198	E.SINYRH.G		395.197	2	789.388	789.4	-16	5	21.86	>tr|A0A6P2ASP4|A0A6P2ASP4_9CYAN IS200/IS605 family transposase OS=Spirulina sp. DLM2.Bin59 OX=2480215 GN=tnpA PE=4 SV=1	15.9728	1778900
199	R.QLPHKFTV.W		485.279	2	969.55	969.552	-1.9	62	221.98	>tr|A0A6P2AZL4|A0A6P2AZL4_9CYAN Uncharacterized protein OS=Spirulina sp. DLM2.Bin59 OX=2480215 GN=EA366_02045 PE=4 SV=1	22.8669	1730000
200	R.PHQFP.Q		313.158	2	625.308	625.309	-2.6	62	160.36	>tr|A0A6P2AVF1|A0A6P2AVF1_9CYAN ATP-binding protein (Fragment) OS=Spirulina sp. DLM2.Bin59 OX=2480215 GN=EA366_06615 PE=4 SV=1	23.601	1719800
201	E.PLKPTH.S		692.404	1	692.404	692.409	-7.8	91	12.12	>tr|A0A6P2AYX2|A0A6P2AYX2_9CYAN Uncharacterized protein OS=Spirulina sp. DLM2.Bin59 OX=2480215 GN=EA366_03325 PE=4 SV=1	45.7376	1703800
202	Q.LSC[+57.021]AIPQ.R	C[+57]	788.391	1	788.391	788.397	-7.2	63	37.82	>tr|A0A6P2AYV3|A0A6P2AYV3_9CYAN Gfo/Idh/MocA family oxidoreductase (Fragment) OS=Spirulina sp. DLM2.Bin59 OX=2480215 GN=EA366_01330 PE=4 SV=1	54.6962	1667600
203	G.FDPVATD.P		764.36	1	764.36	764.346	18.6	38	21.59	>tr|A0A6P2AI45|A0A6P2AI45_9CYAN Uncharacterized protein OS=Spirulina sp. DLM2.Bin59 OX=2480215 GN=EA366_16190 PE=4 SV=1	62.7547	1650200
204	L.YLTSPQ.P		708.356	1	708.356	708.356	-0.1	751	6.67	>tr|A0A6P2AVJ2|A0A6P2AVJ2_9CYAN PAS domain S-box protein OS=Spirulina sp. DLM2.Bin59 OX=2480215 GN=EA366_04855 PE=4 SV=1	24.9599	1644100
205	G.QIPAAAVERF.T		551.307	2	1101.61	1101.61	1	171	125.73	>tr|A0A6P2B0M7|A0A6P2B0M7_9CYAN Four-carbon acid sugar kinase family protein OS=Spirulina sp. DLM2.Bin59 OX=2480215 GN=EA366_01460 PE=3 SV=1	47.152	1641700
206	F.TLAFV.G		550.327	1	550.327	550.323	7.1	40	7	>tr|A0A6P2AW81|A0A6P2AW81_9CYAN Aldoketomutase OS=Spirulina sp. DLM2.Bin59 OX=2480215 GN=gloA PE=4 SV=1	47.152	1641700
207	G.TLAVF.N		550.327	1	550.327	550.323	7.1	337	7	>tr|A0A6P2ATM4|A0A6P2ATM4_9CYAN CHAT domain-containing protein (Fragment) OS=Spirulina sp. DLM2.Bin59 OX=2480215 GN=EA366_11740 PE=4 SV=1	47.152	1641700
208	P.DKGKHQ.A		712.361	1	712.361	712.374	-17.5	251	10.48	>tr|A0A6P2AKU1|A0A6P2AKU1_9CYAN Type I site-specific deoxyribonuclease OS=Spirulina sp. DLM2.Bin59 OX=2480215 GN=EA366_14665 PE=3 SV=1	59.6124	1625800
209	Q.KDYAATLRDLEQ.Y		711.854	2	1422.7	1422.72	-14.7	33	4.95	>tr|A0A6P2AMK2|A0A6P2AMK2_9CYAN TPR_REGION domain-containing protein (Fragment) OS=Spirulina sp. DLM2.Bin59 OX=2480215 GN=EA366_13880 PE=4 SV=1	58.605	1625800
210	I.TAAPDGTGTIVEYQ.G		711.855	2	1422.7	1422.67	19.2	28	3.56	>tr|A0A6P2AXZ0|A0A6P2AXZ0_9CYAN CHAT domain-containing protein OS=Spirulina sp. DLM2.Bin59 OX=2480215 GN=EA366_06550 PE=4 SV=1	59.1098	1625800
211	A.IALWEAWQP.D		557.289	2	1113.57	1113.57	-1.4	343	15.23	>tr|A0A6P2AWV7|A0A6P2AWV7_9CYAN Response regulator (Fragment) OS=Spirulina sp. DLM2.Bin59 OX=2480215 GN=EA366_05860 PE=4 SV=1	37.1052	1498100
212	Q.VFL.W		378.238	1	378.238	378.239	-1.4	162	100.61	>tr|A0A6P2AY18|A0A6P2AY18_9CYAN PAS domain S-box protein (Fragment) OS=Spirulina sp. DLM2.Bin59 OX=2480215 GN=EA366_04135 PE=3 SV=1	48.9601	1436700
213	I.PLF.L		376.222	1	376.222	376.223	-1.9	70	97.22	>tr|A0A6P2B207|A0A6P2B207_9CYAN O-antigen ligase family protein OS=Spirulina sp. DLM2.Bin59 OX=2480215 GN=EA366_01800 PE=4 SV=1	48.4345	1436700
214	P.IVF.L		378.238	1	378.238	378.239	-1.3	372	90.55	>tr|A0A6P2B207|A0A6P2B207_9CYAN O-antigen ligase family protein OS=Spirulina sp. DLM2.Bin59 OX=2480215 GN=EA366_01800 PE=4 SV=1	48.4345	1436700
215	G.VFLYLV.I		377.233	2	753.459	753.455	5.4	36	65.78	>tr|A0A6P2AL52|A0A6P2AL52_9CYAN Uncharacterized protein OS=Spirulina sp. DLM2.Bin59 OX=2480215 GN=EA366_13715 PE=4 SV=1	48.9601	1436700
216	R.AATFY.V		572.269	1	572.269	572.271	-4	380	50.31	>tr|A0A6P2AKA6|A0A6P2AKA6_9CYAN Replicative DNA helicase OS=Spirulina sp. DLM2.Bin59 OX=2480215 GN=dnaB PE=3 SV=1	41.3885	1417400
217	A.PQQKVLV.Q		811.503	1	811.503	811.504	-1.4	88	4.58	>tr|A0A6P2AS25|A0A6P2AS25_9CYAN Rne/Rng family ribonuclease OS=Spirulina sp. DLM2.Bin59 OX=2480215 GN=EA366_10065 PE=4 SV=1	42.1989	1408100
218	P.TAAQEPYTKG.K		533.255	2	1065.5	1065.52	-17.6	295	85.19	>tr|A0A6P2AWD9|A0A6P2AWD9_9CYAN Caspase family protein OS=Spirulina sp. DLM2.Bin59 OX=2480215 GN=EA366_06700 PE=4 SV=1	32.9824	1394600
219	E.RSQTDFT.T		854.403	1	854.403	854.4	3.3	25	27.82	>tr|A0A6P2AX74|A0A6P2AX74_9CYAN DUF86 domain-containing protein OS=Spirulina sp. DLM2.Bin59 OX=2480215 GN=EA366_01825 PE=4 SV=1	40.8709	1344100
220	I.PGLQFL.R		674.387	1	674.387	674.387	-0.8	469	76.66	>tr|A0A6P2AL84|A0A6P2AL84_9CYAN DUF11 domain-containing protein OS=Spirulina sp. DLM2.Bin59 OX=2480215 GN=EA366_14385 PE=4 SV=1	53.6662	1293600
221	R.AMRLATQGAPN.D		565.292	2	1129.58	1129.58	-1.4	107	9.83	>tr|A0A6P2ATV0|A0A6P2ATV0_9CYAN Uncharacterized protein (Fragment) OS=Spirulina sp. DLM2.Bin59 OX=2480215 GN=EA366_07515 PE=4 SV=1	25.2587	1138300
222	L.THFFLPPLAG.D		550.301	2	1099.59	1099.59	0.5	80	35.57	>tr|A0A6P2AQF4|A0A6P2AQF4_9CYAN Uncharacterized protein OS=Spirulina sp. DLM2.Bin59 OX=2480215 GN=EA366_12805 PE=4 SV=1	33.2987	1081800
223	E.PFPMPEP.I		814.379	1	814.379	814.38	-1.7	463	18.8	>tr|A0A6P2AYV8|A0A6P2AYV8_9CYAN Tetratricopeptide repeat protein OS=Spirulina sp. DLM2.Bin59 OX=2480215 GN=EA366_03370 PE=4 SV=1	51.7192	1006000
224	E.PFPGAPET.A		815.408	1	815.408	815.393	17.9	258	2.02	>tr|A0A6P2AZ57|A0A6P2AZ57_9CYAN Glycerol-3-phosphate dehydrogenase OS=Spirulina sp. DLM2.Bin59 OX=2480215 GN=EA366_00695 PE=3 SV=1	51.7192	1006000
225	S.SSIPFRDLIA.P		559.817	2	1118.63	1118.62	5.1	194	37.81	>tr|A0A6P2B2V6|A0A6P2B2V6_9CYAN Sulfate transport system permease protein CysT OS=Spirulina sp. DLM2.Bin59 OX=2480215 GN=cysT PE=3 SV=1	50.9765	1003700
226	L.TPPPQH.T		338.67	2	676.332	676.341	-14.1	30	69.54	>tr|A0A6P2AUX9|A0A6P2AUX9_9CYAN Glycosyltransferase family 9 protein OS=Spirulina sp. DLM2.Bin59 OX=2480215 GN=EA366_08575 PE=4 SV=1	15.4851	991350
227	Q.LSKPQ.S		572.341	1	572.341	572.34	2.2	36	29.15	>tr|A0A6P2AJ42|A0A6P2AJ42_9CYAN DUF760 domain-containing protein OS=Spirulina sp. DLM2.Bin59 OX=2480215 GN=EA366_14675 PE=4 SV=1	39.9683	906760
228	P.DKAGLFNNAAQ.S		574.782	2	1148.56	1148.57	-11	65	14.71	>tr|A0A6P2AWJ1|A0A6P2AWJ1_9CYAN Superoxide dismutase OS=Spirulina sp. DLM2.Bin59 OX=2480215 GN=EA366_04185 PE=3 SV=1	39.9683	906760
229	S.LPYTRMEAQ.S		554.776	2	1108.55	1108.55	-0.3	123	59.89	>tr|A0A6P2AY03|A0A6P2AY03_9CYAN TIGR03943 family protein OS=Spirulina sp. DLM2.Bin59 OX=2480215 GN=EA366_04935 PE=4 SV=1	51.8301	786930
230	A.AATFPQHTL.R		493.26	2	985.513	985.51	2.6	27	35.96	>tr|A0A6P2AZL2|A0A6P2AZL2_9CYAN Uncharacterized protein (Fragment) OS=Spirulina sp. DLM2.Bin59 OX=2480215 GN=EA366_01405 PE=3 SV=1	34.141	767620
231	T.LVQPQ.E		584.34	1	584.34	584.34	-0.3	312	2.97	>tr|A0A6P2B256|A0A6P2B256_9CYAN Gamma-glutamyl phosphate reductase OS=Spirulina sp. DLM2.Bin59 OX=2480215 GN=proA PE=3 SV=1	18.3213	753110
232	S.QLPDGVGFA.D		903.456	1	903.456	903.457	-1.4	165	53.66	>tr|A0A6P2AVM1|A0A6P2AVM1_9CYAN Uncharacterized protein OS=Spirulina sp. DLM2.Bin59 OX=2480215 GN=EA366_08550 PE=4 SV=1	55.8864	727340
233	H.TGGVYFGQPK.G		527.265	2	1053.52	1053.54	-13.3	139	47.38	>tr|A0A6P2AHG1|A0A6P2AHG1_9CYAN 3-isopropylmalate dehydrogenase (Fragment) OS=Spirulina sp. DLM2.Bin59 OX=2480215 GN=EA366_16125 PE=4 SV=1	31.8298	725360
234	C.KDVDLH.E		726.381	1	726.381	726.378	3.8	389	3.8	>tr|A0A6P2AYN6|A0A6P2AYN6_9CYAN PAS domain S-box protein OS=Spirulina sp. DLM2.Bin59 OX=2480215 GN=EA366_01700 PE=4 SV=1	46.9985	693760
235	Q.IQPLHFVTF.T		551.308	2	1101.61	1101.61	-0.9	282	25.97	>tr|A0A6P2AMN0|A0A6P2AMN0_9CYAN 2,3-bisphosphoglycerate-independent phosphoglycerate mutase OS=Spirulina sp. DLM2.Bin59 OX=2480215 GN=gpmI PE=3 SV=1	45.1619	693750
236	V.LRVDT.I		603.34	1	603.34	603.346	-10.8	294	1.95	>tr|A0A6P2AR10|A0A6P2AR10_9CYAN GNAT family N-acetyltransferase OS=Spirulina sp. DLM2.Bin59 OX=2480215 GN=EA366_10945 PE=4 SV=1	60.4058	669510
237	K.WRVPF.T		704.396	1	704.396	704.388	11.5	43	30.45	>tr|A0A6P2AWY0|A0A6P2AWY0_9CYAN DUF445 family protein (Fragment) OS=Spirulina sp. DLM2.Bin59 OX=2480215 GN=EA366_09340 PE=4 SV=1	51.2873	544980
238	K.AGPQLL.E		598.356	1	598.356	598.356	-0.3	594	4.97	>tr|A0A6P2ANL2|A0A6P2ANL2_9CYAN Elongation factor G OS=Spirulina sp. DLM2.Bin59 OX=2480215 GN=fusA PE=3 SV=1	45.0352	484430
239	R.QPFPNIED.S		480.234	2	959.46	959.447	13.5	146	70.68	>tr|A0A6P2AY77|A0A6P2AY77_9CYAN Type I secretion system permease/ATPase OS=Spirulina sp. DLM2.Bin59 OX=2480215 GN=EA366_02560 PE=4 SV=1	29.9322	463290
240	I.VFEPEE.-		749.341	1	749.341	749.335	8.4	118	26.58	>tr|A0A6P2AZA1|A0A6P2AZA1_9CYAN Cupin domain-containing protein OS=Spirulina sp. DLM2.Bin59 OX=2480215 GN=EA366_03980 PE=4 SV=1	52.0127	456980
241	D.FYLALGRQRIGELY.L		849.969	2	1698.93	1698.93	-1.3	1243	41.35	>tr|A0A6P2AV92|A0A6P2AV92_9CYAN Non-specific serine/threonine protein kinase OS=Spirulina sp. DLM2.Bin59 OX=2480215 GN=EA366_09750 PE=4 SV=1	62.7701	443790
242	T.EHTY.Q		549.234	1	549.234	549.23	6.9	315	18.75	>tr|A0A6P2AX76|A0A6P2AX76_9CYAN CHAT domain-containing protein (Fragment) OS=Spirulina sp. DLM2.Bin59 OX=2480215 GN=EA366_06560 PE=4 SV=1	9.7759	302420
243	V.LNLTIIDPDE.A		571.797	2	1142.59	1142.59	-6	122	1.63	>tr|A0A6P2AQI2|A0A6P2AQI2_9CYAN Cell division protein SepF OS=Spirulina sp. DLM2.Bin59 OX=2480215 GN=sepF PE=3 SV=1	55.9688	242800
244	T.QIEVLR.S		379.231	2	757.455	757.457	-2	117	306.96	>tr|A0A6P2ATU9|A0A6P2ATU9_9CYAN Polysaccharide biosynthesis tyrosine autokinase OS=Spirulina sp. DLM2.Bin59 OX=2480215 GN=EA366_08920 PE=4 SV=1	30.8773	0
245	Q.IEVLR.S		315.202	2	629.396	629.398	-3.1	118	250.01	>tr|A0A6P2ATU9|A0A6P2ATU9_9CYAN Polysaccharide biosynthesis tyrosine autokinase OS=Spirulina sp. DLM2.Bin59 OX=2480215 GN=EA366_08920 PE=4 SV=1	27.1454	0
246	P.LGGF.F		393.213	1	393.213	393.213	-1	22	224.61	>tr|A0A6P2AUY4|A0A6P2AUY4_9CYAN UDP-N-acetylmuramate--L-alanine ligase (Fragment) OS=Spirulina sp. DLM2.Bin59 OX=2480215 GN=EA366_05945 PE=4 SV=1	41.7782	0
247	G.TGFLQHP.Q		400.207	2	799.408	799.41	-2.5	255	212.64	>tr|A0A6P2AW28|A0A6P2AW28_9CYAN Restriction endonuclease (Fragment) OS=Spirulina sp. DLM2.Bin59 OX=2480215 GN=EA366_08060 PE=4 SV=1	31.9737	0
248	T.FAGF.W		441.213	1	441.213	441.213	0.2	281	192.21	>tr|A0A6P2AXU5|A0A6P2AXU5_9CYAN DUF1092 family protein OS=Spirulina sp. DLM2.Bin59 OX=2480215 GN=EA366_02385 PE=4 SV=1	46.419	0
249	S.QRQLR.L		350.707	2	700.408	700.421	-19.4	506	179.85	>tr|A0A6P2AWB2|A0A6P2AWB2_9CYAN Hsp70 family protein OS=Spirulina sp. DLM2.Bin59 OX=2480215 GN=EA366_04605 PE=3 SV=1	19.3282	0
250	L.LSY.I		382.197	1	382.197	382.197	0	791	176.31	>tr|A0A6P2AY92|A0A6P2AY92_9CYAN WD_REPEATS_REGION domain-containing protein (Fragment) OS=Spirulina sp. DLM2.Bin59 OX=2480215 GN=EA366_01695 PE=4 SV=1	28.1651	0
251	A.LQPPF.E		601.335	1	601.335	601.334	1.7	225	173.2	>tr|A0A6P2AZ99|A0A6P2AZ99_9CYAN Red carotenoid-binding protein OS=Spirulina sp. DLM2.Bin59 OX=2480215 GN=EA366_01355 PE=3 SV=1	48.2425	0
252	G.QIEAIR.V		365.216	2	729.425	729.425	-1	306	167.68	>tr|A0A6P2ATU8|A0A6P2ATU8_9CYAN Uncharacterized protein OS=Spirulina sp. DLM2.Bin59 OX=2480215 GN=EA366_08290 PE=4 SV=1	24.1703	0
253	A.QFQPL.T		632.341	1	632.341	632.34	0.4	81	165.99	>tr|A0A6P2AVL4|A0A6P2AVL4_9CYAN Glutathione synthetase OS=Spirulina sp. DLM2.Bin59 OX=2480215 GN=gshB PE=3 SV=1	37.4563	0
254	Y.PQGAGSAPI.V		797.413	1	797.413	797.415	-2.7	418	157.79	>tr|A0A6P2AWZ8|A0A6P2AWZ8_9CYAN Histidine phosphatase family protein OS=Spirulina sp. DLM2.Bin59 OX=2480215 GN=EA366_02185 PE=4 SV=1	23.6889	0
255	E.QQLPF.L		632.341	1	632.341	632.34	1.6	373	142.62	>tr|A0A6P2AY93|A0A6P2AY93_9CYAN CTP synthase OS=Spirulina sp. DLM2.Bin59 OX=2480215 GN=pyrG PE=3 SV=1	48.708	0
256	P.LML.D		376.223	1	376.223	376.226	-8.5	412	138.9	>tr|A0A6P2AMU6|A0A6P2AMU6_9CYAN Methionine synthase OS=Spirulina sp. DLM2.Bin59 OX=2480215 GN=metH PE=3 SV=1	43.2031	0
257	G.YDALR.L		319.168	2	637.328	637.33	-3.6	640	138.5	>tr|A0A6P2AK88|A0A6P2AK88_9CYAN Phosphoenolpyruvate carboxylase OS=Spirulina sp. DLM2.Bin59 OX=2480215 GN=ppc PE=3 SV=1	18.7743	0
258	V.LFTGAGPH.S		400.208	2	799.408	799.41	-1.8	61	135.92	>tr|A0A6P2AUA8|A0A6P2AUA8_9CYAN 1,4-dihydroxy-2-naphthoyl-CoA synthase OS=Spirulina sp. DLM2.Bin59 OX=2480215 GN=menB PE=3 SV=1	32.4944	0
259	R.TLF.T		380.217	1	380.217	380.218	-1.8	272	134.55	>tr|A0A6P2AY18|A0A6P2AY18_9CYAN PAS domain S-box protein (Fragment) OS=Spirulina sp. DLM2.Bin59 OX=2480215 GN=EA366_04135 PE=3 SV=1	42.8694	0
260	S.SLIQY.S		623.34	1	623.34	623.34	0.4	393	122.95	>tr|A0A6P2AV25|A0A6P2AV25_9CYAN Histidinol dehydrogenase OS=Spirulina sp. DLM2.Bin59 OX=2480215 GN=hisD PE=3 SV=1	42.3619	0
261	P.QWLPE.Q		672.336	1	672.336	672.335	1.4	97	111.97	>tr|A0A6P2AKI1|A0A6P2AKI1_9CYAN Uncharacterized protein OS=Spirulina sp. DLM2.Bin59 OX=2480215 GN=EA366_15735 PE=4 SV=1	48.4795	0
262	R.QQFSQ.K		637.284	1	637.284	637.294	-15.2	190	108.79	>tr|A0A6P2AYY8|A0A6P2AYY8_9CYAN 4-diphosphocytidyl-2-C-methyl-D-erythritol kinase OS=Spirulina sp. DLM2.Bin59 OX=2480215 GN=ispE PE=3 SV=1	39.1874	0
263	A.LWAVLQ.Q		365.216	2	729.424	729.429	-7.1	35	108.47	>tr|A0A6P2AYU0|A0A6P2AYU0_9CYAN Uncharacterized protein OS=Spirulina sp. DLM2.Bin59 OX=2480215 GN=EA366_04890 PE=4 SV=1	23.3922	0
264	Q.QFQAH.L		630.288	1	630.288	630.299	-18.5	48	107.06	>tr|A0A6P2AXI8|A0A6P2AXI8_9CYAN Hybrid sensor histidine kinase/response regulator OS=Spirulina sp. DLM2.Bin59 OX=2480215 GN=EA366_08795 PE=4 SV=1	37.4563	0
265	S.LQAPL.V		541.335	1	541.335	541.334	1.6	41	104.22	>tr|A0A6P2ANW1|A0A6P2ANW1_9CYAN Cytochrome c oxidase subunit 2 OS=Spirulina sp. DLM2.Bin59 OX=2480215 GN=EA366_13800 PE=3 SV=1	36.8603	0
266	G.LFFPYW.H		436.718	2	872.428	872.434	-6.9	214	99.69	>tr|A0A6P2AS29|A0A6P2AS29_9CYAN Acyltransferase OS=Spirulina sp. DLM2.Bin59 OX=2480215 GN=EA366_09450 PE=4 SV=1	33.5832	0
267	A.AATFPQHT.L		436.718	2	872.429	872.426	2.8	27	99.15	>tr|A0A6P2AZL2|A0A6P2AZL2_9CYAN Uncharacterized protein (Fragment) OS=Spirulina sp. DLM2.Bin59 OX=2480215 GN=EA366_01405 PE=3 SV=1	29.2022	0
268	X.XERQX.X		652.329	1	652.329	652.32	13.6	33	98.37	>sp|P81000|GVPC_SPICC Gas vesicle protein C (Fragment) OS=Spirulina sp. (strain CCAP 1475/10) OX=69016 GN=gvpC PE=1 SV=1	31.7574	0
269	S.PQGITVTS.L		802.442	1	802.442	802.431	14.6	604	93.51	>tr|A0A6P2AVY3|A0A6P2AVY3_9CYAN CHAT domain-containing protein OS=Spirulina sp. DLM2.Bin59 OX=2480215 GN=EA366_04540 PE=4 SV=1	54.7246	0
270	C.QQPPEQ.R		726.357	1	726.357	726.342	20.7	100	89.28	>tr|A0A6P2AN50|A0A6P2AN50_9CYAN ATP-binding protein OS=Spirulina sp. DLM2.Bin59 OX=2480215 GN=EA366_13510 PE=4 SV=1	28.8638	0
271	T.LHIESY.A		381.189	2	761.37	761.383	-16.5	143	89.14	>tr|A0A6P2AP29|A0A6P2AP29_9CYAN DUF882 domain-containing protein OS=Spirulina sp. DLM2.Bin59 OX=2480215 GN=EA366_12790 PE=4 SV=1	28.1651	0
272	S.LASLLES.G		366.707	2	732.406	732.414	-10.7	6	87.93	>tr|A0A6P2B0K1|A0A6P2B0K1_9CYAN 30S ribosomal protein S2 OS=Spirulina sp. DLM2.Bin59 OX=2480215 GN=rpsB PE=3 SV=1	26.884	0
273	Q.TIPSNL.Q		322.689	2	644.371	644.361	15.7	179	86.16	>tr|A0A6P2AJ52|A0A6P2AJ52_9CYAN AMIN domain-containing protein (Fragment) OS=Spirulina sp. DLM2.Bin59 OX=2480215 GN=EA366_14980 PE=4 SV=1	24.04	0
274	E.TAAQIDHFY.Q		533.255	2	1065.5	1065.5	1.8	344	86.14	>tr|A0A6P2AUT9|A0A6P2AUT9_9CYAN Type 2 lantipeptide synthetase LanM OS=Spirulina sp. DLM2.Bin59 OX=2480215 GN=lanM PE=4 SV=1	34.0061	0
275	T.VLYIVF.G		377.234	2	753.46	753.455	7.6	139	85.88	>tr|A0A6P2APJ8|A0A6P2APJ8_9CYAN Permease OS=Spirulina sp. DLM2.Bin59 OX=2480215 GN=EA366_11350 PE=3 SV=1	48.324	0
276	A.LVEGANQVRD.E		550.788	2	1100.57	1100.57	-0.4	117	85.81	>tr|A0A6P2APC1|A0A6P2APC1_9CYAN Uncharacterized protein (Fragment) OS=Spirulina sp. DLM2.Bin59 OX=2480215 GN=EA366_12555 PE=4 SV=1	20.331	0
277	T.LFR.Y		435.271	1	435.271	435.271	-0.6	41	81.49	>tr|A0A6P2B207|A0A6P2B207_9CYAN O-antigen ligase family protein OS=Spirulina sp. DLM2.Bin59 OX=2480215 GN=EA366_01800 PE=4 SV=1	32.5125	0
278	V.LM[+15.995]PLR.G	M[+16]	323.19	2	645.373	645.375	-3.3	418	80.55	>tr|A0A6P2AK15|A0A6P2AK15_9CYAN Uncharacterized protein OS=Spirulina sp. DLM2.Bin59 OX=2480215 GN=EA366_15415 PE=4 SV=1	25.4107	0
279	D.LTWLDWIY.Q		555.286	2	1109.56	1109.57	-1.8	313	77.15	>tr|A0A6P2AWK1|A0A6P2AWK1_9CYAN GHKL domain-containing protein OS=Spirulina sp. DLM2.Bin59 OX=2480215 GN=EA366_04160 PE=4 SV=1	52.8403	0
280	K.QSPIEAYVF.F		527.263	2	1053.52	1053.53	-5.7	64	76.92	>tr|A0A6P2AHU0|A0A6P2AHU0_9CYAN MBL fold metallo-hydrolase OS=Spirulina sp. DLM2.Bin59 OX=2480215 GN=EA366_15870 PE=4 SV=1	32.3355	0
281	L.QPQFIP.E		729.391	1	729.391	729.393	-2.3	210	75.88	>tr|A0A6P2AXZ7|A0A6P2AXZ7_9CYAN Sirohydrochlorin chelatase OS=Spirulina sp. DLM2.Bin59 OX=2480215 GN=EA366_02100 PE=4 SV=1	52.1612	0
282	K.PQILPQ.L		348.212	2	695.417	695.409	11.7	72	75.82	>tr|A0A6P2AR22|A0A6P2AR22_9CYAN Pyrroline-5-carboxylate reductase OS=Spirulina sp. DLM2.Bin59 OX=2480215 GN=proC PE=3 SV=1	21.9384	0
283	T.IQIPC[+57.021]R.Q	C[+57]	393.718	2	786.43	786.429	0.7	972	73.11	>tr|A0A6P2AV20|A0A6P2AV20_9CYAN PAS domain S-box protein OS=Spirulina sp. DLM2.Bin59 OX=2480215 GN=EA366_05830 PE=4 SV=1	28.9089	0
284	F.LYPWAVAFSQ.L		591.315	2	1181.62	1181.6	19.4	79	65.54	>tr|A0A6P2ALR1|A0A6P2ALR1_9CYAN NAD(P)H-quinone oxidoreductase subunit 3 OS=Spirulina sp. DLM2.Bin59 OX=2480215 GN=ndhC PE=3 SV=1	46.8747	0
285	R.TLDLPH.L		348.189	2	695.371	695.372	-1.6	105	64.92	>tr|A0A6P2ALG7|A0A6P2ALG7_9CYAN 2-amino-4-hydroxy-6-hydroxymethyldihydropteridine pyrophosphokinase OS=Spirulina sp. DLM2.Bin59 OX=2480215 GN=folK PE=4 SV=1	32.7037	0
286	K.THQLF.R		323.171	2	645.334	645.336	-2.6	621	64.87	>tr|A0A6P2AMD8|A0A6P2AMD8_9CYAN DNA polymerase III subunit alpha OS=Spirulina sp. DLM2.Bin59 OX=2480215 GN=EA366_13305 PE=4 SV=1	25.4107	0
287	V.TAAASL.Y		533.293	1	533.293	533.293	-0.7	271	64.78	>tr|A0A6P2AXL9|A0A6P2AXL9_9CYAN DUF58 domain-containing protein OS=Spirulina sp. DLM2.Bin59 OX=2480215 GN=EA366_04350 PE=4 SV=1	25.8518	0
288	E.QQEGFIP.L		818.398	1	818.398	818.404	-8.4	114	64.24	>tr|A0A6P2AZM2|A0A6P2AZM2_9CYAN Uma2 family endonuclease OS=Spirulina sp. DLM2.Bin59 OX=2480215 GN=EA366_01340 PE=4 SV=1	51.6848	0
289	G.IFQ.T		407.228	1	407.228	407.229	-0.9	787	62.16	>tr|A0A6P2AY18|A0A6P2AY18_9CYAN PAS domain S-box protein (Fragment) OS=Spirulina sp. DLM2.Bin59 OX=2480215 GN=EA366_04135 PE=3 SV=1	27.9069	0
290	D.LEAGEVVQTY.G		554.776	2	1108.55	1108.55	-6.1	294	61.41	>tr|A0A6P2AZW2|A0A6P2AZW2_9CYAN Uncharacterized protein OS=Spirulina sp. DLM2.Bin59 OX=2480215 GN=EA366_05710 PE=4 SV=1	52.3338	0
291	Q.QADAASSTAVVA.A		545.768	2	1090.53	1090.54	-7.2	171	59.85	>tr|A0A6P2AVQ5|A0A6P2AVQ5_9CYAN Uncharacterized protein OS=Spirulina sp. DLM2.Bin59 OX=2480215 GN=EA366_07620 PE=4 SV=1	25.7069	0
292	T.AATFSITD.I		825.405	1	825.405	825.399	8	38	59.51	>tr|A0A6P2ANZ2|A0A6P2ANZ2_9CYAN PEP-CTERM sorting domain-containing protein OS=Spirulina sp. DLM2.Bin59 OX=2480215 GN=EA366_12845 PE=4 SV=1	43.4158	0
293	T.GVSQPIY.D		763.397	1	763.397	763.399	-1.5	203	59.13	>tr|A0A6P2AQS3|A0A6P2AQS3_9CYAN Histidine kinase OS=Spirulina sp. DLM2.Bin59 OX=2480215 GN=EA366_10940 PE=4 SV=1	39.0656	0
294	Y.QIEIAKH.G		419.743	2	838.478	838.478	0.4	194	58.56	>tr|A0A6P2AZJ4|A0A6P2AZJ4_9CYAN Response regulator (Fragment) OS=Spirulina sp. DLM2.Bin59 OX=2480215 GN=EA366_02175 PE=4 SV=1	16.1281	0
295	T.QPQPPQ.E		694.359	1	694.359	694.352	9.7	901	58.01	>tr|A0A6P2AWA4|A0A6P2AWA4_9CYAN Serine/threonine-protein kinase PknK (Fragment) OS=Spirulina sp. DLM2.Bin59 OX=2480215 GN=EA366_04690 PE=4 SV=1	35.6908	0
296	E.TAAFQTW.I		824.393	1	824.393	824.394	-1	241	57.74	>tr|A0A6P2AI35|A0A6P2AI35_9CYAN AAA_31 domain-containing protein OS=Spirulina sp. DLM2.Bin59 OX=2480215 GN=EA366_16225 PE=4 SV=1	43.4158	0
297	Q.QAGQHSV.F		726.355	1	726.355	726.353	3.2	208	55.59	>tr|A0A6P2AWW7|A0A6P2AWW7_9CYAN Uncharacterized protein (Fragment) OS=Spirulina sp. DLM2.Bin59 OX=2480215 GN=EA366_02350 PE=4 SV=1	28.3567	0
298	V.FDYL.E		557.261	1	557.261	557.261	0.6	796	54.06	>tr|A0A6P2AWY7|A0A6P2AWY7_9CYAN DNA polymerase I OS=Spirulina sp. DLM2.Bin59 OX=2480215 GN=polA PE=3 SV=1	49.9632	0
299	D.LQLIDVREAE.E		593.333	2	1185.66	1185.65	10	27	53.97	>tr|A0A6P2AKG5|A0A6P2AKG5_9CYAN Rhodanese-related sulfurtransferase OS=Spirulina sp. DLM2.Bin59 OX=2480215 GN=EA366_14595 PE=4 SV=1	36.114	0
300	P.TAAALGYG.Q		723.369	1	723.369	723.367	3.1	161	53.48	>tr|A0A6P2AWB2|A0A6P2AWB2_9CYAN Hsp70 family protein OS=Spirulina sp. DLM2.Bin59 OX=2480215 GN=EA366_04605 PE=3 SV=1	33.8183	0
301	A.LSNGY.L		553.263	1	553.263	553.262	2.1	205	53.37	>tr|A0A6P2ARN8|A0A6P2ARN8_9CYAN Transglutaminase family protein (Fragment) OS=Spirulina sp. DLM2.Bin59 OX=2480215 GN=EA366_09910 PE=4 SV=1	28.5893	0
302	E.LGGYISPS.F		397.214	2	793.42	793.409	13.8	264	50.8	>tr|A0A6P2AI97|A0A6P2AI97_9CYAN DMT family transporter OS=Spirulina sp. DLM2.Bin59 OX=2480215 GN=EA366_15095 PE=4 SV=1	34.0682	0
303	T.QPGTPQAL.R		811.427	1	811.427	811.431	-5	736	50.48	>tr|A0A6P2AV21|A0A6P2AV21_9CYAN Aminopeptidase N OS=Spirulina sp. DLM2.Bin59 OX=2480215 GN=EA366_06185 PE=3 SV=1	47.3405	0
304	N.THNPQSQSE.E		514.221	2	1027.43	1027.44	-9.7	33	50.22	>tr|A0A6P2ALE7|A0A6P2ALE7_9CYAN GTP cyclohydrolase 1 OS=Spirulina sp. DLM2.Bin59 OX=2480215 GN=folE PE=3 SV=1	17.2595	0
305	A.LSPDR.I		587.309	1	587.309	587.315	-10.4	55	49.58	>tr|A0A6P2AX13|A0A6P2AX13_9CYAN Urease accessory protein UreG OS=Spirulina sp. DLM2.Bin59 OX=2480215 GN=ureG PE=3 SV=1	28.2467	0
306	L.RSFGQYG.I		814.371	1	814.371	814.384	-16.6	321	48.83	>tr|A0A6P2AWF3|A0A6P2AWF3_9CYAN Mechanosensitive ion channel family protein OS=Spirulina sp. DLM2.Bin59 OX=2480215 GN=EA366_03630 PE=3 SV=1	38.0289	0
307	A.LDHWVNFAG.R		529.758	2	1058.51	1058.51	2.7	202	48.04	>tr|A0A6P2AMW9|A0A6P2AMW9_9CYAN Histidine kinase OS=Spirulina sp. DLM2.Bin59 OX=2480215 GN=EA366_15295 PE=4 SV=1	49.3984	0
308	V.AATAGSWGV.N		819.402	1	819.402	819.399	2.4	250	47.6	>tr|A0A6P2AVM2|A0A6P2AVM2_9CYAN Lipid II flippase MurJ (Fragment) OS=Spirulina sp. DLM2.Bin59 OX=2480215 GN=EA366_04695 PE=4 SV=1	44.8618	0
309	A.THAEFRPGA.P		493.241	2	985.475	985.485	-10.1	662	47.16	>tr|A0A6P2ATM4|A0A6P2ATM4_9CYAN CHAT domain-containing protein (Fragment) OS=Spirulina sp. DLM2.Bin59 OX=2480215 GN=EA366_11740 PE=4 SV=1	33.6161	0
310	D.LGAIGHLEAA.Q		476.267	2	951.526	951.526	0.3	199	45.91	>tr|A0A6P2AST4|A0A6P2AST4_9CYAN HEAT repeat domain-containing protein OS=Spirulina sp. DLM2.Bin59 OX=2480215 GN=EA366_09555 PE=4 SV=1	31.4004	0
311	R.QFTLFDAQLQ.N		605.815	2	1210.62	1210.61	10.5	150	44.73	>tr|A0A6P2AXF6|A0A6P2AXF6_9CYAN Leucyl/phenylalanyl-tRNA--protein transferase OS=Spirulina sp. DLM2.Bin59 OX=2480215 GN=aat PE=3 SV=1	35.0602	0
312	V.QLPPT.Q		555.313	1	555.313	555.314	-1	185	44.68	>tr|A0A6P2ANX9|A0A6P2ANX9_9CYAN Uncharacterized protein (Fragment) OS=Spirulina sp. DLM2.Bin59 OX=2480215 GN=EA366_13750 PE=4 SV=1	52.3338	0
313	A.REIQ.E		545.311	1	545.311	545.304	11.9	337	44.03	>tr|A0A6P2AJ41|A0A6P2AJ41_9CYAN Flotillin family protein OS=Spirulina sp. DLM2.Bin59 OX=2480215 GN=EA366_15005 PE=4 SV=1	45.2791	0
314	L.QQWFSGQT.A		491.224	2	981.442	981.442	-1	295	44.02	>tr|A0A6P2ATZ2|A0A6P2ATZ2_9CYAN ABC transporter ATP-binding protein OS=Spirulina sp. DLM2.Bin59 OX=2480215 GN=EA366_10685 PE=4 SV=1	27.3159	0
315	K.IFVYG.K		598.322	1	598.322	598.323	-2.9	79	43.33	>tr|A0A6P2AV70|A0A6P2AV70_9CYAN UPF0234 protein EA366_06785 OS=Spirulina sp. DLM2.Bin59 OX=2480215 GN=EA366_06785 PE=3 SV=1	53.9735	0
316	P.LVFYG.V		598.322	1	598.322	598.323	-2.9	164	43.33	>tr|A0A6P2AMW9|A0A6P2AMW9_9CYAN Histidine kinase OS=Spirulina sp. DLM2.Bin59 OX=2480215 GN=EA366_15295 PE=4 SV=1	53.9735	0
317	W.AGPY.D		407.204	1	407.204	407.192	28.4	530	42.63	>tr|A0A6P2AMG7|A0A6P2AMG7_9CYAN Cytochrome c oxidase subunit 1 OS=Spirulina sp. DLM2.Bin59 OX=2480215 GN=ctaD PE=3 SV=1	27.9069	0
318	I.GC[+57.021]GF.F	C[+57]	440.157	1	440.157	440.16	-6.8	322	42.47	>tr|A0A6P2AI97|A0A6P2AI97_9CYAN DMT family transporter OS=Spirulina sp. DLM2.Bin59 OX=2480215 GN=EA366_15095 PE=4 SV=1	46.419	0
319	G.IVPA.P		399.26	1	399.26	399.26	-1.4	239	37.54	>tr|A0A6P2AY92|A0A6P2AY92_9CYAN WD_REPEATS_REGION domain-containing protein (Fragment) OS=Spirulina sp. DLM2.Bin59 OX=2480215 GN=EA366_01695 PE=4 SV=1	32.4944	0
320	E.GVSQSFNS.M		825.367	1	825.367	825.374	-8.4	403	37.03	>tr|A0A6P2AW39|A0A6P2AW39_9CYAN Histidine kinase OS=Spirulina sp. DLM2.Bin59 OX=2480215 GN=EA366_08045 PE=4 SV=1	44.2505	0
321	T.TAAPGNFL.P		790.409	1	790.409	790.409	-0.3	291	37.02	>tr|A0A6P2AX62|A0A6P2AX62_9CYAN Alpha-amylase (Fragment) OS=Spirulina sp. DLM2.Bin59 OX=2480215 GN=EA366_03440 PE=4 SV=1	30.8966	0
322	S.AANFPAYP.I		850.411	1	850.411	850.409	2.1	240	36.3	>tr|A0A6P2B1Y9|A0A6P2B1Y9_9CYAN CocE/NonD family hydrolase (Fragment) OS=Spirulina sp. DLM2.Bin59 OX=2480215 GN=EA366_01895 PE=4 SV=1	44.8841	0
323	Q.FLGYWQ.A		407.204	2	813.402	813.393	10.4	244	35.51	>tr|A0A6P2APG5|A0A6P2APG5_9CYAN Uncharacterized protein OS=Spirulina sp. DLM2.Bin59 OX=2480215 GN=EA366_11715 PE=4 SV=1	27.2945	0
324	A.TAAPLC[+57.021]A.T	C[+57]	703.342	1	703.342	703.344	-3.3	14	35.4	>tr|A0A6P2AK36|A0A6P2AK36_9CYAN Peptidase OS=Spirulina sp. DLM2.Bin59 OX=2480215 GN=EA366_16040 PE=4 SV=1	49.2231	0
325	E.AATQEMLS.I		850.411	1	850.411	850.398	16.3	40	32.18	>tr|A0A6P2AKP9|A0A6P2AKP9_9CYAN Uncharacterized protein OS=Spirulina sp. DLM2.Bin59 OX=2480215 GN=EA366_15625 PE=4 SV=1	45.7347	0
326	S.LSHPGI.P		312.179	2	623.35	623.351	-2.1	91	32.05	>tr|A0A6P2AUT6|A0A6P2AUT6_9CYAN Non-specific serine/threonine protein kinase (Fragment) OS=Spirulina sp. DLM2.Bin59 OX=2480215 GN=EA366_09360 PE=4 SV=1	36.1597	0
327	C.VYPVPQ.D		702.378	1	702.378	702.382	-6.3	267	31.81	>tr|A0A6P2AKZ5|A0A6P2AKZ5_9CYAN Amino acid adenylation domain-containing protein (Fragment) OS=Spirulina sp. DLM2.Bin59 OX=2480215 GN=EA366_13655 PE=4 SV=1	56.0098	0
328	P.EEPGQ.F		559.25	1	559.25	559.236	25.9	193	31.54	>tr|A0A6P2AZ16|A0A6P2AZ16_9CYAN Uncharacterized protein OS=Spirulina sp. DLM2.Bin59 OX=2480215 GN=EA366_04465 PE=4 SV=1	40.6115	0
329	S.LFDPGLYLGGQ.P		590.295	2	1179.58	1179.6	-19.1	309	31.32	>tr|A0A6P2AUL0|A0A6P2AUL0_9CYAN 4Fe-4S binding protein OS=Spirulina sp. DLM2.Bin59 OX=2480215 GN=EA366_06870 PE=4 SV=1	46.3619	0
330	D.LADLGSR.R		366.202	2	731.396	731.405	-12	275	30.43	>tr|A0A6P2AHP8|A0A6P2AHP8_9CYAN Serine/threonine protein kinase OS=Spirulina sp. DLM2.Bin59 OX=2480215 GN=EA366_15520 PE=4 SV=1	26.884	0
331	L.TAAPGSS.A		590.265	1	590.265	590.278	-21.2	290	29.96	>tr|A0A6P2AVL3|A0A6P2AVL3_9CYAN CinA-like protein OS=Spirulina sp. DLM2.Bin59 OX=2480215 GN=EA366_06725 PE=3 SV=1	37.6892	0
332	I.PQQQPQ.S		725.358	1	725.358	725.358	0.9	267	29.05	>tr|A0A6P2AL02|A0A6P2AL02_9CYAN Orotate phosphoribosyltransferase OS=Spirulina sp. DLM2.Bin59 OX=2480215 GN=pyrE PE=3 SV=1	43.1673	0
333	V.YVPTEH.I		745.353	1	745.353	745.351	2	294	27.89	>tr|A0A6P2AT22|A0A6P2AT22_9CYAN YegS/Rv2252/BmrU family lipid kinase OS=Spirulina sp. DLM2.Bin59 OX=2480215 GN=EA366_11325 PE=4 SV=1	35.1873	0
334	S.FLFGDGN.P		769.347	1	769.347	769.351	-5.2	184	27.85	>tr|A0A6P2ANG7|A0A6P2ANG7_9CYAN Uncharacterized protein OS=Spirulina sp. DLM2.Bin59 OX=2480215 GN=EA366_12130 PE=4 SV=1	52.3258	0
335	Y.LENRL.L		322.69	2	644.372	644.373	-1.5	1448	27.7	>tr|A0A6P2AV92|A0A6P2AV92_9CYAN Non-specific serine/threonine protein kinase OS=Spirulina sp. DLM2.Bin59 OX=2480215 GN=EA366_09750 PE=4 SV=1	24.599	0
336	A.RSQSFNFAVYG.L		638.311	2	1275.61	1275.61	2.5	525	27.65	>tr|A0A6P2AVQ6|A0A6P2AVQ6_9CYAN WD_REPEATS_REGION domain-containing protein OS=Spirulina sp. DLM2.Bin59 OX=2480215 GN=EA366_06575 PE=4 SV=1	39.1874	0
337	L.THEGHAWI.D		950.454	1	950.454	950.448	6.4	122	27.62	>tr|A0A6P2AJ25|A0A6P2AJ25_9CYAN DNA-binding response regulator OS=Spirulina sp. DLM2.Bin59 OX=2480215 GN=EA366_15925 PE=4 SV=1	43.7344	0
338	A.QPVNLIQ.I		406.237	2	811.467	811.467	0.1	193	27.01	>tr|A0A6P2AP66|A0A6P2AP66_9CYAN Sensor histidine kinase OS=Spirulina sp. DLM2.Bin59 OX=2480215 GN=EA366_12825 PE=4 SV=1	28.6227	0
339	P.LQFNPDHSPQ.P		591.786	2	1182.56	1182.55	9	541	26.17	>tr|A0A6P2AXZ4|A0A6P2AXZ4_9CYAN Biosynthetic arginine decarboxylase OS=Spirulina sp. DLM2.Bin59 OX=2480215 GN=speA PE=3 SV=1	37.6892	0
340	K.NLYIKND.A		879.465	1	879.465	879.457	8.6	104	26.13	>tr|A0A6P2AKC1|A0A6P2AKC1_9CYAN Threonine synthase OS=Spirulina sp. DLM2.Bin59 OX=2480215 GN=EA366_14165 PE=3 SV=1	48.0664	0
341	I.LERPRK.I		399.756	2	798.505	798.494	13.1	65	25.07	>tr|A0A6P2AIN7|A0A6P2AIN7_9CYAN 6-phosphogluconate dehydrogenase, decarboxylating OS=Spirulina sp. DLM2.Bin59 OX=2480215 GN=gnd PE=3 SV=1	57.2196	0
342	L.DKGAGWTS.H		821.378	1	821.378	821.379	-0.8	10	24.59	>tr|A0A6P2ARX7|A0A6P2ARX7_9CYAN tRNA pseudouridine synthase B OS=Spirulina sp. DLM2.Bin59 OX=2480215 GN=truB PE=3 SV=1	44.8618	0
343	M.PQQLWDT.T		887.427	1	887.427	887.426	1.7	582	24.52	>tr|A0A6P2B0L2|A0A6P2B0L2_9CYAN DNA gyrase subunit B OS=Spirulina sp. DLM2.Bin59 OX=2480215 GN=gyrB PE=3 SV=1	49.1054	0
344	A.QLVEQFNYV.C		570.292	2	1139.58	1139.57	2.6	578	24.29	>tr|A0A6P2AQR4|A0A6P2AQR4_9CYAN Uncharacterized protein OS=Spirulina sp. DLM2.Bin59 OX=2480215 GN=EA366_13475 PE=4 SV=1	48.1721	0
345	A.QPYDTEKGAG.T		533.254	2	1065.5	1065.48	14.4	25	24.22	>tr|A0A6P2AZS1|A0A6P2AZS1_9CYAN Glycine--tRNA ligase alpha subunit OS=Spirulina sp. DLM2.Bin59 OX=2480215 GN=glyQ PE=3 SV=1	32.4794	0
346	Q.IIRDEAFP.F		480.762	2	960.517	960.515	2.6	88	22.25	>tr|A0A6P2APS9|A0A6P2APS9_9CYAN Site-specific DNA-methyltransferase (adenine-specific) OS=Spirulina sp. DLM2.Bin59 OX=2480215 GN=EA366_12365 PE=3 SV=1	43.3041	0
347	R.YSYPG.T		586.254	1	586.254	586.251	6.2	100	21.59	>tr|A0A6P2AXZ4|A0A6P2AXZ4_9CYAN Biosynthetic arginine decarboxylase OS=Spirulina sp. DLM2.Bin59 OX=2480215 GN=speA PE=3 SV=1	28.2467	0
348	I.AATQLQN.Q		745.386	1	745.386	745.384	2.7	201	21.41	>tr|A0A6P2ARL1|A0A6P2ARL1_9CYAN Uncharacterized protein OS=Spirulina sp. DLM2.Bin59 OX=2480215 GN=EA366_12045 PE=4 SV=1	40.9894	0
349	L.PQLHFS.P		728.359	1	728.359	728.373	-18.3	171	20.36	>tr|A0A6P2AKF7|A0A6P2AKF7_9CYAN Uma2 family endonuclease OS=Spirulina sp. DLM2.Bin59 OX=2480215 GN=EA366_14610 PE=4 SV=1	52.1612	0
350	Q.VLLG.L		401.276	1	401.276	401.276	-0.4	708	19.23	>tr|A0A6P2AX54|A0A6P2AX54_9CYAN DUF3854 domain-containing protein OS=Spirulina sp. DLM2.Bin59 OX=2480215 GN=EA366_04245 PE=4 SV=1	35.2732	0
351	G.AGFHLSIHGY.V		551.27	2	1101.53	1101.55	-14.1	92	19.03	>tr|A0A6P2AXR4|A0A6P2AXR4_9CYAN Phosphotransacetylase family protein OS=Spirulina sp. DLM2.Bin59 OX=2480215 GN=EA366_08510 PE=4 SV=1	29.1309	0
352	A.QLLIVQ.G		713.454	1	713.454	713.456	-2.1	25	18.59	>tr|A0A6P2AT76|A0A6P2AT76_9CYAN Uncharacterized protein (Fragment) OS=Spirulina sp. DLM2.Bin59 OX=2480215 GN=EA366_09190 PE=4 SV=1	58.2341	0
353	S.QQTGFAYPG.D		484.733	2	968.459	968.447	12.3	579	18.49	>tr|A0A6P2AQZ9|A0A6P2AQZ9_9CYAN DEAD/DEAH box helicase (Fragment) OS=Spirulina sp. DLM2.Bin59 OX=2480215 GN=EA366_11950 PE=4 SV=1	22.5666	0
354	L.KDGTPVVIRPI.R		597.857	2	1194.71	1194.72	-12.2	762	17.89	>tr|A0A6P2AR10|A0A6P2AR10_9CYAN GNAT family N-acetyltransferase OS=Spirulina sp. DLM2.Bin59 OX=2480215 GN=EA366_10945 PE=4 SV=1	54.5281	0
355	S.QPQFFR.V		822.413	1	822.413	822.426	-15.6	70	17.89	>tr|A0A6P2AT03|A0A6P2AT03_9CYAN PAS domain S-box protein OS=Spirulina sp. DLM2.Bin59 OX=2480215 GN=EA366_09765 PE=4 SV=1	50.7538	0
356	T.HPQAFTYT.R		482.736	2	964.465	964.452	13.2	307	17.66	>tr|A0A6P2AWU8|A0A6P2AWU8_9CYAN Uncharacterized protein OS=Spirulina sp. DLM2.Bin59 OX=2480215 GN=EA366_06995 PE=4 SV=1	23.2831	0
357	E.FGE.P		352.165	1	352.165	352.15	42.6	228	17.65	>tr|A0A6P2AP84|A0A6P2AP84_9CYAN Uncharacterized protein OS=Spirulina sp. DLM2.Bin59 OX=2480215 GN=EA366_13540 PE=4 SV=1	46.3399	0
358	R.TAAVEQFAQ.E		482.736	2	964.465	964.473	-8.6	278	16.97	>tr|A0A6P2AV44|A0A6P2AV44_9CYAN Leucine--tRNA ligase OS=Spirulina sp. DLM2.Bin59 OX=2480215 GN=leuS PE=3 SV=1	22.7716	0
359	V.TAAIAFAQTQD.I		568.781	2	1136.55	1136.56	-3.5	156	16.52	>tr|A0A6P2AVG6|A0A6P2AVG6_9CYAN Mechanosensitive ion channel family protein OS=Spirulina sp. DLM2.Bin59 OX=2480215 GN=EA366_05015 PE=3 SV=1	36.9316	0
360	R.QGFPT.T		549.273	1	549.273	549.267	11.9	140	16.49	>tr|A0A6P2B2S4|A0A6P2B2S4_9CYAN Extracellular solute-binding protein OS=Spirulina sp. DLM2.Bin59 OX=2480215 GN=EA366_00755 PE=4 SV=1	29.3034	0
361	G.KDFFR.A		712.363	1	712.363	712.378	-20.1	756	16.02	>tr|A0A6P2AVV2|A0A6P2AVV2_9CYAN PAS domain S-box protein OS=Spirulina sp. DLM2.Bin59 OX=2480215 GN=EA366_09255 PE=4 SV=1	60.1245	0
362	G.IGMFYC[+57.021].Y	C[+57]	395.668	2	790.329	790.326	3.8	157	15.79	>tr|A0A6P2AYU5|A0A6P2AYU5_9CYAN Uncharacterized protein OS=Spirulina sp. DLM2.Bin59 OX=2480215 GN=EA366_07310 PE=4 SV=1	42.5087	0
363	A.LHPPS.A		550.299	1	550.299	550.298	2	321	15.6	>tr|A0A6P2AY92|A0A6P2AY92_9CYAN WD_REPEATS_REGION domain-containing protein (Fragment) OS=Spirulina sp. DLM2.Bin59 OX=2480215 GN=EA366_01695 PE=4 SV=1	26.9154	0
364	E.QILQIPY.Y		874.5	1	874.5	874.503	-4.3	142	15.22	>tr|A0A6P2AY46|A0A6P2AY46_9CYAN Uma2 family endonuclease (Fragment) OS=Spirulina sp. DLM2.Bin59 OX=2480215 GN=EA366_02840 PE=4 SV=1	53.1249	0
365	P.FGWVK.Q		318.68	2	636.353	636.35	4	6	14.72	>tr|A0A6P2AYI1|A0A6P2AYI1_9CYAN Uncharacterized protein (Fragment) OS=Spirulina sp. DLM2.Bin59 OX=2480215 GN=EA366_03260 PE=4 SV=1	25.4745	0
366	V.KDQTFK.L		766.406	1	766.406	766.409	-5	46	14.39	>tr|A0A6P2AQ24|A0A6P2AQ24_9CYAN Adenylosuccinate synthetase (Fragment) OS=Spirulina sp. DLM2.Bin59 OX=2480215 GN=EA366_11555 PE=3 SV=1	39.1351	0
367	L.TVC[+57.021]G.G	C[+57]	436.194	1	436.194	436.186	17.5	104	14.24	>tr|A0A6P2AUA2|A0A6P2AUA2_9CYAN DEAD/DEAH box helicase OS=Spirulina sp. DLM2.Bin59 OX=2480215 GN=EA366_06975 PE=3 SV=1	38.8528	0
368	V.VSGGFFL.L		726.382	1	726.382	726.382	0.1	163	14.2	>tr|A0A6P2AWF9|A0A6P2AWF9_9CYAN ABC transporter ATP-binding protein OS=Spirulina sp. DLM2.Bin59 OX=2480215 GN=EA366_04770 PE=4 SV=1	45.8999	0
369	V.LVVGLQN.F		742.443	1	742.443	742.446	-3	9	14.1	>tr|A0A6P2AZE0|A0A6P2AZE0_9CYAN YggT family protein OS=Spirulina sp. DLM2.Bin59 OX=2480215 GN=EA366_01675 PE=3 SV=1	37.9988	0
370	R.AGLEAYQPH.P		493.241	2	985.476	985.474	2.1	64	13.71	>tr|A0A6P2AV50|A0A6P2AV50_9CYAN Dabb family protein OS=Spirulina sp. DLM2.Bin59 OX=2480215 GN=EA366_06675 PE=4 SV=1	33.5486	0
371	P.QQPPSELIQYYNI.Q		796.886	2	1592.77	1592.8	-19	62	13.49	>tr|A0A6P2APA7|A0A6P2APA7_9CYAN Glycosyltransferase OS=Spirulina sp. DLM2.Bin59 OX=2480215 GN=EA366_11530 PE=4 SV=1	48.6056	0
372	V.SRPYWLHNN.-		593.787	2	1186.57	1186.58	-6.8	341	13.28	>tr|A0A6P2APK5|A0A6P2APK5_9CYAN Potassium channel protein OS=Spirulina sp. DLM2.Bin59 OX=2480215 GN=EA366_12440 PE=4 SV=1	36.114	0
373	R.QPQFQPF.G		891.436	1	891.436	891.436	0.5	121	12.72	>tr|A0A6P2B109|A0A6P2B109_9CYAN Uncharacterized protein OS=Spirulina sp. DLM2.Bin59 OX=2480215 GN=EA366_03625 PE=4 SV=1	45.5947	0
374	K.LPVM[+15.995]L.Q	M[+16]	588.358	1	588.358	588.342	26.2	201	12.68	>tr|A0A6P2AVL4|A0A6P2AVL4_9CYAN Glutathione synthetase OS=Spirulina sp. DLM2.Bin59 OX=2480215 GN=gshB PE=3 SV=1	61.3157	0
375	L.PQAGHFQ.L		784.386	1	784.386	784.374	16	188	11.98	>tr|A0A6P2AUK1|A0A6P2AUK1_9CYAN Radical SAM/Cys-rich domain protein OS=Spirulina sp. DLM2.Bin59 OX=2480215 GN=EA366_10215 PE=4 SV=1	42.3333	0
376	G.SVGPNTGQN.Y		873.396	1	873.396	873.406	-11.9	228	11.84	>tr|A0A6P2AZ56|A0A6P2AZ56_9CYAN Urea ABC transporter permease subunit UrtB OS=Spirulina sp. DLM2.Bin59 OX=2480215 GN=urtB PE=4 SV=1	56.5865	0
377	H.QLPMVRSI.F		472.265	2	943.522	943.539	-18.4	375	11.6	>tr|A0A6P2AWC8|A0A6P2AWC8_9CYAN Alpha-amylase (Fragment) OS=Spirulina sp. DLM2.Bin59 OX=2480215 GN=EA366_03790 PE=4 SV=1	41.3453	0
378	L.LFLYVLPL.A		489.315	2	977.624	977.607	17	207	11.42	>tr|A0A6P2AQ88|A0A6P2AQ88_9CYAN TIGR02921 family PEP-CTERM protein OS=Spirulina sp. DLM2.Bin59 OX=2480215 GN=EA366_10935 PE=4 SV=1	56.9806	0
379	R.SLYEFT.Q		380.181	2	759.355	759.356	-0.8	107	11.3	>tr|A0A6P2ASW2|A0A6P2ASW2_9CYAN ATP-binding protein OS=Spirulina sp. DLM2.Bin59 OX=2480215 GN=EA366_11480 PE=4 SV=1	23.9439	0
380	T.RSHRYFTAP.E		567.788	2	1134.57	1134.58	-10.9	232	11.24	>tr|A0A6P2AUR1|A0A6P2AUR1_9CYAN DNA mismatch repair protein MutS OS=Spirulina sp. DLM2.Bin59 OX=2480215 GN=mutS PE=3 SV=1	37.6741	0
381	R.TIANPRDAH.H		497.758	2	994.508	994.506	1.8	45	11.09	>tr|A0A6P2AI89|A0A6P2AI89_9CYAN ABC transporter ATP-binding protein OS=Spirulina sp. DLM2.Bin59 OX=2480215 GN=EA366_15075 PE=4 SV=1	24.0272	0
382	L.QQPWFYRFFFQ.I		797.393	2	1593.78	1593.76	9.3	74	10.98	>tr|A0A6P2AN04|A0A6P2AN04_9CYAN Alpha/beta fold hydrolase (Fragment) OS=Spirulina sp. DLM2.Bin59 OX=2480215 GN=EA366_12935 PE=4 SV=1	48.6056	0
383	V.QPALIC[+57.021]HQNP.K	C[+57]	589.286	2	1177.56	1177.58	-12	74	10.92	>tr|A0A6P2APH4|A0A6P2APH4_9CYAN Polyamine aminopropyltransferase OS=Spirulina sp. DLM2.Bin59 OX=2480215 GN=speE PE=3 SV=1	42.0175	0
384	V.QQQFL.R		663.345	1	663.345	663.346	-1.3	109	10.29	>tr|A0A6P2AMB7|A0A6P2AMB7_9CYAN Tetratricopeptide repeat protein (Fragment) OS=Spirulina sp. DLM2.Bin59 OX=2480215 GN=EA366_14640 PE=4 SV=1	40.3955	0
385	E.AATGRNLAFLF.D		590.823	2	1180.64	1180.65	-7.8	440	9.98	>tr|A0A6P2AV21|A0A6P2AV21_9CYAN Aminopeptidase N OS=Spirulina sp. DLM2.Bin59 OX=2480215 GN=EA366_06185 PE=3 SV=1	49.1211	0
386	P.PQGTAVPQ.A		797.417	1	797.417	797.415	1.8	67	9.66	>tr|A0A6P2AW38|A0A6P2AW38_9CYAN DUF3370 domain-containing protein OS=Spirulina sp. DLM2.Bin59 OX=2480215 GN=EA366_09020 PE=4 SV=1	51.3574	0
387	A.IVNNY.A		622.32	1	622.32	622.319	0.3	156	9.17	>tr|A0A6P2APG5|A0A6P2APG5_9CYAN Uncharacterized protein OS=Spirulina sp. DLM2.Bin59 OX=2480215 GN=EA366_11715 PE=4 SV=1	56.3514	0
388	G.IVNYN.S		622.32	1	622.32	622.319	0.3	328	9.17	>tr|A0A6P2AWQ1|A0A6P2AWQ1_9CYAN Glutamate 5-kinase OS=Spirulina sp. DLM2.Bin59 OX=2480215 GN=proB PE=3 SV=1	56.3514	0
389	L.TLDH.S		485.248	1	485.248	485.235	25.3	194	8.64	>tr|A0A6P2AYA9|A0A6P2AYA9_9CYAN GAF domain-containing protein OS=Spirulina sp. DLM2.Bin59 OX=2480215 GN=EA366_05925 PE=4 SV=1	52.0963	0
390	L.SGVATTEI.N		777.413	1	777.413	777.399	17.5	270	8.28	>tr|A0A6P2AV45|A0A6P2AV45_9CYAN Chaperone protein DnaK OS=Spirulina sp. DLM2.Bin59 OX=2480215 GN=dnaK PE=2 SV=1	43.6399	0
391	L.TAAPGSSAY.F		824.392	1	824.392	824.379	16.7	290	8.14	>tr|A0A6P2AVL3|A0A6P2AVL3_9CYAN CinA-like protein OS=Spirulina sp. DLM2.Bin59 OX=2480215 GN=EA366_06725 PE=3 SV=1	40.3693	0
392	A.QYPF.L		554.268	1	554.268	554.261	11.8	83	8.03	>tr|A0A6P2AXH5|A0A6P2AXH5_9CYAN Polyphosphate:AMP phosphotransferase OS=Spirulina sp. DLM2.Bin59 OX=2480215 GN=pap PE=4 SV=1	41.8234	0
393	V.TVGC[+57.021].S	C[+57]	436.193	1	436.193	436.186	16.1	8	7.9	>tr|A0A6P2AJ29|A0A6P2AJ29_9CYAN Uncharacterized protein OS=Spirulina sp. DLM2.Bin59 OX=2480215 GN=EA366_16045 PE=4 SV=1	38.9862	0
394	E.QQLDVVYRTF.H		634.835	2	1268.66	1268.66	-0.5	746	7.59	>tr|A0A6P2AVR9|A0A6P2AVR9_9CYAN Formate C-acetyltransferase OS=Spirulina sp. DLM2.Bin59 OX=2480215 GN=pflB PE=3 SV=1	48.708	0
395	T.TAAEMVVDPLY.E		604.789	2	1208.57	1208.59	-13.1	153	7.26	>tr|A0A6P2AKI7|A0A6P2AKI7_9CYAN LysR family transcriptional regulator OS=Spirulina sp. DLM2.Bin59 OX=2480215 GN=EA366_13860 PE=3 SV=1	38.9838	0
396	P.QPFAPFLRYA.G		605.33	2	1209.65	1209.64	8.6	168	6.84	>tr|A0A6P2AY23|A0A6P2AY23_9CYAN ABC transporter substrate-binding protein OS=Spirulina sp. DLM2.Bin59 OX=2480215 GN=EA366_04075 PE=4 SV=1	38.9838	0
397	W.ERYPQ.G		692.346	1	692.346	692.336	14.8	238	6.77	>tr|A0A6P2AZV3|A0A6P2AZV3_9CYAN JAB domain-containing protein OS=Spirulina sp. DLM2.Bin59 OX=2480215 GN=EA366_00825 PE=3 SV=1	38.3155	0
398	H.LDGHPQF.M		407.204	2	813.401	813.389	14.7	269	6.55	>tr|A0A6P2AXM4|A0A6P2AXM4_9CYAN Aminomethyltransferase OS=Spirulina sp. DLM2.Bin59 OX=2480215 GN=gcvT PE=3 SV=1	23.025	0
399	E.AGIEFAYPT.Q		484.746	2	968.484	968.472	12.3	333	5.22	>tr|A0A6P2AZ14|A0A6P2AZ14_9CYAN Mechanosensitive ion channel family protein OS=Spirulina sp. DLM2.Bin59 OX=2480215 GN=EA366_03065 PE=3 SV=1	51.4671	0
400	G.TAAAYG.L		553.263	1	553.263	553.262	2.3	83	5.14	>tr|A0A6P2ASH1|A0A6P2ASH1_9CYAN DUF1818 family protein OS=Spirulina sp. DLM2.Bin59 OX=2480215 GN=EA366_11665 PE=4 SV=1	29.106	0
401	G.YHFL.G		579.294	1	579.294	579.293	2.9	62	4.47	>tr|A0A6P2AXA2|A0A6P2AXA2_9CYAN DUF2079 domain-containing protein OS=Spirulina sp. DLM2.Bin59 OX=2480215 GN=EA366_01690 PE=4 SV=1	45.3304	0
402	N.LRFG.V		492.293	1	492.293	492.293	0.8	410	3.59	>tr|A0A6P2B083|A0A6P2B083_9CYAN Transketolase OS=Spirulina sp. DLM2.Bin59 OX=2480215 GN=tkt PE=3 SV=1	32.6345	0
403	H.QPQRREQ.M		941.474	1	941.474	941.491	-18.5	349	3.28	>tr|A0A6P2AVA2|A0A6P2AVA2_9CYAN Lipid-A-disaccharide synthase OS=Spirulina sp. DLM2.Bin59 OX=2480215 GN=EA366_08270 PE=4 SV=1	53.1941	0
404	F.KFDQLKSKDR.Y		632.848	2	1264.69	1264.7	-9.3	269	3.15	>tr|A0A6P2ARN8|A0A6P2ARN8_9CYAN Transglutaminase family protein (Fragment) OS=Spirulina sp. DLM2.Bin59 OX=2480215 GN=EA366_09910 PE=4 SV=1	37.9593	0
405	T.THYM.D		551.218	1	551.218	551.228	-18.8	190	2.59	>tr|A0A6P2B185|A0A6P2B185_9CYAN ABC transporter ATP-binding protein OS=Spirulina sp. DLM2.Bin59 OX=2480215 GN=EA366_03205 PE=4 SV=1	15.4696	0
406	D.PQFAPTSPAEIESN.T		744.354	2	1487.7	1487.7	-1.1	185	2.36	>tr|A0A6P2AU27|A0A6P2AU27_9CYAN Universal stress protein OS=Spirulina sp. DLM2.Bin59 OX=2480215 GN=EA366_07540 PE=3 SV=1	57.8814	0
407	W.QHPQM[+15.995]P.W	M[+16]	753.339	1	753.339	753.335	5	193	2.13	>tr|A0A6P2AHC7|A0A6P2AHC7_9CYAN S9 family peptidase OS=Spirulina sp. DLM2.Bin59 OX=2480215 GN=EA366_15730 PE=3 SV=1	32.2307	0
408	L.SGVQPTGNL.H		872.439	1	872.439	872.447	-9.7	8	1.79	>tr|A0A6P2AMQ6|A0A6P2AMQ6_9CYAN Tryptophan--tRNA ligase OS=Spirulina sp. DLM2.Bin59 OX=2480215 GN=trpS PE=3 SV=1	51.7496	0
409	A.QPGFWD.D		749.32	1	749.32	749.325	-6.7	42	1.64	>tr|A0A6P2ARF8|A0A6P2ARF8_9CYAN Peptide chain release factor 2 OS=Spirulina sp. DLM2.Bin59 OX=2480215 GN=prfB PE=3 SV=1	41.6117	0
410	Q.QQQM[+15.995]LNALQLQNAQ.L	M[+16]	822.413	2	1643.82	1643.82	1.5	175	1.4	>tr|A0A6P2AXI8|A0A6P2AXI8_9CYAN Hybrid sensor histidine kinase/response regulator OS=Spirulina sp. DLM2.Bin59 OX=2480215 GN=EA366_08795 PE=4 SV=1	44.6189	0
411	L.TAAVNSIN.K		789.404	1	789.404	789.41	-7.7	39	1.34	>tr|A0A6P2AZ82|A0A6P2AZ82_9CYAN Magnesium chelatase OS=Spirulina sp. DLM2.Bin59 OX=2480215 GN=EA366_04130 PE=3 SV=1	30.3533	0
412	I.PQQLHIPQ.L		960.514	1	960.514	960.526	-12.5	102	1.17	>tr|A0A6P2AXT7|A0A6P2AXT7_9CYAN Serine/threonine-protein phosphatase OS=Spirulina sp. DLM2.Bin59 OX=2480215 GN=EA366_05370 PE=4 SV=1	43.4805	0
413	R.VGSPNFGQ.W		805.399	1	805.399	805.384	18.8	88	0.23	>tr|A0A6P2B049|A0A6P2B049_9CYAN dTDP-4-dehydrorhamnose 3,5-epimerase OS=Spirulina sp. DLM2.Bin59 OX=2480215 GN=rfbC PE=3 SV=1	46.6273	0

## Sheet: Sheet2
	VTY
	TVLYEH
	KDEYKHLNFGEV
	RVVPVQP
	ILY
	YVPASHA
	PFAAGLSL
	QILPQ
	AIMALW
	VTGGGY
	ETTRSQAADLAFAIK
	QQPPAY
	QVPVVY
	QPQWF
	PFAAQAQTVNQDLF
	LQLLIPTLDPA
	SVGPNTGQNYIIDT
	AATQSTYNALAAPN
	TVGEKNY
	TAAQWAELQFAWQ
	QERELGNQPQ
	QLQELDPENL
	TITASYFGNPQ
	YGPYT
	LFPQQP
	AATNQSH
	RSQPGKG
	TVKRLLPF
