# Supplementary material for: Isolation, identification and in vivo antihypertensive effect of novel angiotensin I-converting enzyme (ACE) inhibitory peptides from Spirulina protein hydrolysate
Source: Royal Society of Chemistry journal article supplement (doi:10.1039/d2fo01207c), 2022-01-01
Supplement: d2fo01207c4.xlsx [file d2fo01207c4.xlsx]

## Sheet: Spectra
	Peptide < ProteinMetrics Confidential >	Modification Type(s)	Observed m/z	z	Observed (M+H)	Calc. mass (M+H)	Mass error (ppm)	Starting position	Score	Protein Name	Scan Time	intensity
1	K.TLMDGGIPH.V		470.735	2	940.463	940.456	7.7	294	109.66	>tr|A0A6P2AMP5|A0A6P2AMP5_9CYAN BMP family ABC transporter substrate-binding protein OS=Spirulina sp. DLM2.Bin59 OX=2480215 GN=EA366_12315 PE=4 SV=1	11.5846	2861300000
2	L.LQAGGLF.K		705.394	1	705.394	705.393	1.2	219	228.03	>tr|A0A6P2AX47|A0A6P2AX47_9CYAN Nuclear transport factor 2 family protein OS=Spirulina sp. DLM2.Bin59 OX=2480215 GN=EA366_04280 PE=4 SV=1	45.0218	2216900000
3	V.YEALR.K		326.176	2	651.346	651.346	-0.8	542	297.93	>tr|A0A6P2AVG3|A0A6P2AVG3_9CYAN Lysine--tRNA ligase OS=Spirulina sp. DLM2.Bin59 OX=2480215 GN=lysS PE=3 SV=1	17.3392	1887100000
4	L.LNVQQALGDR.L		557.307	2	1113.61	1113.6	5	155	265.57	>tr|A0A6P2AXR4|A0A6P2AXR4_9CYAN Phosphotransacetylase family protein OS=Spirulina sp. DLM2.Bin59 OX=2480215 GN=EA366_08510 PE=4 SV=1	23.4045	1850000000
5	A.IAY.I		366.202	1	366.202	366.202	-0.5	362	197.35	>tr|A0A6P2AUX9|A0A6P2AUX9_9CYAN Glycosyltransferase family 9 protein OS=Spirulina sp. DLM2.Bin59 OX=2480215 GN=EA366_08575 PE=4 SV=1	24.3656	1151800000
6	D.QLFSQPF.T		433.732	2	866.456	866.441	17.7	181	105.82	>tr|A0A6P2AQX8|A0A6P2AQX8_9CYAN GH3 auxin-responsive promoter OS=Spirulina sp. DLM2.Bin59 OX=2480215 GN=EA366_11265 PE=4 SV=1	29.0604	947080000
7	R.VTF.N		366.203	1	366.203	366.202	0.6	1030	225.8	>tr|A0A6P2AY04|A0A6P2AY04_9CYAN Helicase (Fragment) OS=Spirulina sp. DLM2.Bin59 OX=2480215 GN=EA366_03670 PE=4 SV=1	32.1437	897920000
8	F.QQPHYLENFIQA.I		744.366	2	1487.73	1487.73	-1.5	29	100.65	>tr|A0A6P2AV88|A0A6P2AV88_9CYAN Alpha-D-glucose phosphate-specific phosphoglucomutase OS=Spirulina sp. DLM2.Bin59 OX=2480215 GN=EA366_06855 PE=3 SV=1	30.8195	791130000
9	D.RVVPVQP.I		397.749	2	794.491	794.488	4	239	164.23	>tr|A0A6P2AX69|A0A6P2AX69_9CYAN dTDP-4-dehydrorhamnose reductase OS=Spirulina sp. DLM2.Bin59 OX=2480215 GN=rfbD PE=3 SV=1	28.1292	715350000
10	E.SQVGVGS.R		633.321	1	633.321	633.32	1.1	487	241.71	>tr|A0A6P2AQX3|A0A6P2AQX3_9CYAN Histidine kinase OS=Spirulina sp. DLM2.Bin59 OX=2480215 GN=EA366_10795 PE=4 SV=1	16.9196	656710000
11	E.TFGHHKAG.T		427.713	2	854.418	854.427	-10.3	292	171.15	>tr|A0A6P2AV51|A0A6P2AV51_9CYAN DUF3536 domain-containing protein OS=Spirulina sp. DLM2.Bin59 OX=2480215 GN=EA366_09155 PE=4 SV=1	20.45	502430000
12	A.LSY.R		382.198	1	382.198	382.197	0.8	703	216.31	>tr|A0A6P2AV51|A0A6P2AV51_9CYAN DUF3536 domain-containing protein OS=Spirulina sp. DLM2.Bin59 OX=2480215 GN=EA366_09155 PE=4 SV=1	25.9587	466260000
13	N.NLSRFYEKMKDY.P		797.386	2	1593.76	1593.77	-5.4	407	145.24	>tr|A0A6P2B145|A0A6P2B145_9CYAN CHAT domain-containing protein OS=Spirulina sp. DLM2.Bin59 OX=2480215 GN=EA366_03470 PE=4 SV=1	30.1069	451290000
14	A.IAPQATY.V		382.197	2	763.388	763.399	-14.1	86	101.7	>tr|A0A6P2AZN0|A0A6P2AZN0_9CYAN Class I SAM-dependent methyltransferase OS=Spirulina sp. DLM2.Bin59 OX=2480215 GN=EA366_03315 PE=4 SV=1	25.3032	446090000
15	A.QPLIPQ.R		695.419	1	695.419	695.409	14.7	440	209.47	>tr|A0A6P2ASV3|A0A6P2ASV3_9CYAN Trans-splicing intein-formed DNA polymerase III subunit alpha C-terminal partner DnaE-C OS=Spirulina sp. DLM2.Bin59 OX=2480215 GN=EA366_12145 PE=4 SV=1	19.2509	414150000
16	Q.PLFPDY.A		376.187	2	751.367	751.366	1.3	180	148.29	>tr|A0A6P2AJI8|A0A6P2AJI8_9CYAN Uncharacterized protein OS=Spirulina sp. DLM2.Bin59 OX=2480215 GN=EA366_15165 PE=4 SV=1	45.4689	398480000
17	L.VYLM[+15.995]PI.L	M[+16]	376.205	2	751.403	751.406	-4.1	18	113.13	>tr|A0A6P2AWD2|A0A6P2AWD2_9CYAN Uncharacterized protein OS=Spirulina sp. DLM2.Bin59 OX=2480215 GN=EA366_06745 PE=3 SV=1	45.4689	398480000
18	E.LFQPH.K		321.173	2	641.34	641.341	-1.5	41	186.48	>tr|E1AW21|E1AW21_9CYAN SQDG synthase (Fragment) OS=Spirulina sp. EEW12 OX=871945 GN=sqdX PE=4 SV=1	21.2435	397700000
19	T.QIEVLR.S		379.232	2	757.457	757.457	0.9	117	288.54	>tr|A0A6P2ATU9|A0A6P2ATU9_9CYAN Polysaccharide biosynthesis tyrosine autokinase OS=Spirulina sp. DLM2.Bin59 OX=2480215 GN=EA366_08920 PE=4 SV=1	27.5685	394520000
20	M.SQTTVPF.W		779.392	1	779.392	779.393	-1.3	179	304.59	>tr|A0A6P2AVU8|A0A6P2AVU8_9CYAN Carotenoid biosynthesis protein OS=Spirulina sp. DLM2.Bin59 OX=2480215 GN=EA366_05550 PE=4 SV=1	40.435	381810000
21	E.QFIPQ.L		632.341	1	632.341	632.34	1.8	623	277.07	>tr|A0A6P2AVF5|A0A6P2AVF5_9CYAN ATP-dependent zinc metalloprotease FtsH OS=Spirulina sp. DLM2.Bin59 OX=2480215 GN=hflB PE=3 SV=1	38.4591	380940000
22	R.QFLAYKAIKEG.I		634.357	2	1267.71	1267.7	1.6	298	151.47	>tr|A0A6P2AY43|A0A6P2AY43_9CYAN Transposase OS=Spirulina sp. DLM2.Bin59 OX=2480215 GN=EA366_08025 PE=3 SV=1	38.4591	380940000
23	T.QQPIIYPPPSE.R		634.835	2	1268.66	1268.65	8.9	96	128.86	>tr|A0A6P2AHE7|A0A6P2AHE7_9CYAN FAA hydrolase family protein OS=Spirulina sp. DLM2.Bin59 OX=2480215 GN=EA366_15690 PE=4 SV=1	39.4725	380940000
24	Y.QQPVTLPDWGQ.V		634.811	2	1268.62	1268.63	-9.4	18	124.27	>tr|A0A6P2B1Q5|A0A6P2B1Q5_9CYAN tRNA (guanine-N(7)-)-methyltransferase OS=Spirulina sp. DLM2.Bin59 OX=2480215 GN=trmB PE=3 SV=1	39.4725	380940000
25	L.VTQQPLGGKAQQGG.Q		684.865	2	1368.72	1368.72	0.2	979	198.4	>tr|A0A6P2ASU0|A0A6P2ASU0_9CYAN DNA-directed RNA polymerase subunit beta OS=Spirulina sp. DLM2.Bin59 OX=2480215 GN=rpoB PE=3 SV=1	20.7925	380750000
26	-.QPQETPPPPGQ.E		588.29	2	1175.57	1175.57	2.8	1	128.84	>tr|A0A6P2AYJ9|A0A6P2AYJ9_9CYAN DUF3086 domain-containing protein (Fragment) OS=Spirulina sp. DLM2.Bin59 OX=2480215 GN=EA366_01115 PE=4 SV=1	24.0684	366500000
27	G.QFPPQSQQ.R		480.235	2	959.462	959.458	4.1	733	211.23	>tr|A0A6P2AJR1|A0A6P2AJR1_9CYAN DUF1574 domain-containing protein OS=Spirulina sp. DLM2.Bin59 OX=2480215 GN=EA366_15565 PE=4 SV=1	26.4782	363360000
28	Q.QIQEWQQ.W		480.235	2	959.462	959.458	4.3	246	162.76	>tr|A0A6P2AXD8|A0A6P2AXD8_9CYAN Chromosome partition protein Smc OS=Spirulina sp. DLM2.Bin59 OX=2480215 GN=smc PE=3 SV=1	25.9713	363360000
29	A.TVMPQLGVD.E		480.248	2	959.489	959.487	1.9	171	119.49	>tr|A0A6P2AIP1|A0A6P2AIP1_9CYAN Glycosyltransferase family 4 protein OS=Spirulina sp. DLM2.Bin59 OX=2480215 GN=EA366_14745 PE=4 SV=1	25.9713	363360000
30	I.QRQIR.E		350.708	2	700.409	700.421	-16.8	29	233.57	>tr|A0A6P2ANT8|A0A6P2ANT8_9CYAN DEAD/DEAH box helicase (Fragment) OS=Spirulina sp. DLM2.Bin59 OX=2480215 GN=EA366_14625 PE=4 SV=1	17.221	334050000
31	L.QLQELDPENL.P		599.797	2	1198.59	1198.6	-6.8	110	119.76	>tr|A0A6P2AV05|A0A6P2AV05_9CYAN TerB family tellurite resistance protein OS=Spirulina sp. DLM2.Bin59 OX=2480215 GN=EA366_07105 PE=4 SV=1	30.4757	328420000
32	T.DVLLNQH.F		419.726	2	838.444	838.442	2.8	48	161.12	>tr|A0A6P2AYN8|A0A6P2AYN8_9CYAN DUF1778 domain-containing protein OS=Spirulina sp. DLM2.Bin59 OX=2480215 GN=EA366_05190 PE=4 SV=1	20.544	320440000
33	G.QGTAIF.P		636.337	1	636.337	636.335	3.1	20	300.47	>tr|A0A6P2AGJ8|A0A6P2AGJ8_9CYAN M24 family metallopeptidase OS=Spirulina sp. DLM2.Bin59 OX=2480215 GN=EA366_16195 PE=3 SV=1	31.3379	298650000
34	V.QAGLLNGEELEP.L		635.331	2	1269.65	1269.63	17.6	80	125.99	>tr|A0A6P2ANZ1|A0A6P2ANZ1_9CYAN 4-alpha-glucanotransferase OS=Spirulina sp. DLM2.Bin59 OX=2480215 GN=malQ PE=3 SV=1	31.3379	298650000
35	Y.PQGAGSAPI.V		797.414	1	797.414	797.415	-1.7	418	168.24	>tr|A0A6P2AWZ8|A0A6P2AWZ8_9CYAN Histidine phosphatase family protein OS=Spirulina sp. DLM2.Bin59 OX=2480215 GN=EA366_02185 PE=4 SV=1	23.9471	293920000
36	G.TTSVPF.L		651.335	1	651.335	651.335	0.7	18	295.77	>tr|A0A6P2AXD8|A0A6P2AXD8_9CYAN Chromosome partition protein Smc OS=Spirulina sp. DLM2.Bin59 OX=2480215 GN=smc PE=3 SV=1	40.5056	263180000
37	V.QPQVLLLDEPFG.A		678.351	2	1355.69	1355.72	-18.8	150	204.58	>tr|A0A6P2AYN9|A0A6P2AYN9_9CYAN Sulfate/thiosulfate import ATP-binding protein CysA OS=Spirulina sp. DLM2.Bin59 OX=2480215 GN=cysA PE=3 SV=1	42.724	259100000
38	R.LTPQPH.P		346.69	2	692.373	692.373	0.4	80	243.89	>tr|A0A6P2AM86|A0A6P2AM86_9CYAN YlxR family protein OS=Spirulina sp. DLM2.Bin59 OX=2480215 GN=EA366_15790 PE=4 SV=1	16.4497	258550000
39	L.SSILM[+15.995]S.V	M[+16]	653.32	1	653.32	653.317	3.3	286	236.99	>tr|A0A6P2AN59|A0A6P2AN59_9CYAN PAS domain-containing sensor histidine kinase OS=Spirulina sp. DLM2.Bin59 OX=2480215 GN=EA366_13345 PE=4 SV=1	27.8005	258070000
40	G.YDALR.L		319.169	2	637.33	637.33	-0.8	640	227.43	>tr|A0A6P2AK88|A0A6P2AK88_9CYAN Phosphoenolpyruvate carboxylase OS=Spirulina sp. DLM2.Bin59 OX=2480215 GN=ppc PE=3 SV=1	17.1736	252820000
41	A.VFLDR.D		325.186	2	649.365	649.367	-1.9	33	282.73	>tr|A0A6P2AWW1|A0A6P2AWW1_9CYAN D,D-heptose 1,7-bisphosphate phosphatase OS=Spirulina sp. DLM2.Bin59 OX=2480215 GN=EA366_07945 PE=3 SV=1	24.6124	249270000
42	E.AGFL.N		407.229	1	407.229	407.229	0.5	454	158.18	>tr|A0A6P2AVP7|A0A6P2AVP7_9CYAN Gamma-glutamyltransferase OS=Spirulina sp. DLM2.Bin59 OX=2480215 GN=ggt PE=4 SV=1	43.7193	228690000
43	G.LEPYRVLMFP.G		632.85	2	1264.69	1264.68	13.5	217	153.99	>tr|A0A6P2B1F3|A0A6P2B1F3_9CYAN Glycosyltransferase OS=Spirulina sp. DLM2.Bin59 OX=2480215 GN=EA366_02815 PE=4 SV=1	28.2423	219050000
44	R.QFLEYLLLPQ.G		632.342	2	1263.68	1263.7	-16.5	71	120.24	>tr|A0A6P2AV81|A0A6P2AV81_9CYAN Sensor histidine kinase OS=Spirulina sp. DLM2.Bin59 OX=2480215 GN=EA366_05875 PE=4 SV=1	27.7402	219050000
45	G.QIEAIR.V		365.216	2	729.425	729.425	-0.6	306	287.7	>tr|A0A6P2ATU8|A0A6P2ATU8_9CYAN Uncharacterized protein OS=Spirulina sp. DLM2.Bin59 OX=2480215 GN=EA366_08290 PE=4 SV=1	21.6185	215490000
46	A.VFT.A		366.202	1	366.202	366.202	-0.2	966	128.92	>tr|A0A6P2AX54|A0A6P2AX54_9CYAN DUF3854 domain-containing protein OS=Spirulina sp. DLM2.Bin59 OX=2480215 GN=EA366_04245 PE=4 SV=1	21.6185	215490000
47	M.QPQPM[+15.995]NELIQQ.Q	M[+16]	671.334	2	1341.66	1341.65	9.9	410	146.58	>tr|A0A6P2AYR4|A0A6P2AYR4_9CYAN ABC transporter substrate-binding protein OS=Spirulina sp. DLM2.Bin59 OX=2480215 GN=EA366_04995 PE=4 SV=1	48.1999	213990000
48	A.AFP.Q		334.176	1	334.176	334.176	-0.6	524	239.14	>tr|A0A6P2AM50|A0A6P2AM50_9CYAN HAMP domain-containing protein OS=Spirulina sp. DLM2.Bin59 OX=2480215 GN=EA366_12590 PE=4 SV=1	28.2972	207290000
49	H.AATLTHG.E		670.359	1	670.359	670.352	9.9	14	161.12	>tr|A0A6P2AU18|A0A6P2AU18_9CYAN Pyridoxal-phosphate dependent enzyme (Fragment) OS=Spirulina sp. DLM2.Bin59 OX=2480215 GN=EA366_07580 PE=4 SV=1	38.1571	205790000
50	V.TVVIPTLNEADR.I		664.371	2	1327.74	1327.72	10.7	54	170.48	>tr|A0A6P2AUU1|A0A6P2AUU1_9CYAN Glycosyltransferase (Fragment) OS=Spirulina sp. DLM2.Bin59 OX=2480215 GN=EA366_06290 PE=4 SV=1	29.4461	203470000
51	T.TVL.S		332.218	1	332.218	332.218	0.4	124	111.22	>tr|A0A6P2AZJ7|A0A6P2AZJ7_9CYAN Phosphoenolpyruvate synthase OS=Spirulina sp. DLM2.Bin59 OX=2480215 GN=EA366_06245 PE=4 SV=1	31.9923	195210000
52	Q.QQSQLM.V		734.347	1	734.347	734.35	-4.9	673	174.88	>tr|A0A6P2ARM5|A0A6P2ARM5_9CYAN PAS domain S-box protein OS=Spirulina sp. DLM2.Bin59 OX=2480215 GN=EA366_10430 PE=4 SV=1	27.8432	185740000
53	N.QFNALPVENLM.G		638.323	2	1275.64	1275.64	-0.8	278	187.79	>tr|A0A6P2AUX9|A0A6P2AUX9_9CYAN Glycosyltransferase family 9 protein OS=Spirulina sp. DLM2.Bin59 OX=2480215 GN=EA366_08575 PE=4 SV=1	54.4111	181250000
54	I.DDIQHPPPLPF.L		638.324	2	1275.64	1275.64	3.4	402	110.92	>tr|A0A6P2AYA9|A0A6P2AYA9_9CYAN GAF domain-containing protein OS=Spirulina sp. DLM2.Bin59 OX=2480215 GN=EA366_05925 PE=4 SV=1	53.9048	181250000
55	M.QPQAAPP.P		708.356	1	708.356	708.367	-15.9	280	135.06	>tr|A0A6P2B1C5|A0A6P2B1C5_9CYAN SPFH domain-containing protein (Fragment) OS=Spirulina sp. DLM2.Bin59 OX=2480215 GN=EA366_00170 PE=4 SV=1	37.8884	179260000
56	Y.QATRYSYGGLG.Y		586.782	2	1172.56	1172.57	-11.3	41	114.56	>tr|A0A6P2AYI3|A0A6P2AYI3_9CYAN FAD-binding oxidoreductase (Fragment) OS=Spirulina sp. DLM2.Bin59 OX=2480215 GN=EA366_07625 PE=4 SV=1	11.5819	178930000
57	S.GDRYPAL.M		396.206	2	791.404	791.405	-0.4	207	186.17	>tr|A0A6P2AXX1|A0A6P2AXX1_9CYAN DEAD/DEAH box helicase OS=Spirulina sp. DLM2.Bin59 OX=2480215 GN=EA366_04295 PE=4 SV=1	25.3004	177070000
58	L.LDAYPNR.V		424.717	2	848.428	848.426	2	125	202.55	>tr|A0A6P2AHJ4|A0A6P2AHJ4_9CYAN Phosphoribosylglycinamide formyltransferase OS=Spirulina sp. DLM2.Bin59 OX=2480215 GN=purN PE=3 SV=1	22.2113	171730000
59	R.DVVISNSLAEIN.R		637.338	2	1273.67	1273.66	4.7	233	135.13	>tr|A0A6P2AXH2|A0A6P2AXH2_9CYAN Uncharacterized protein OS=Spirulina sp. DLM2.Bin59 OX=2480215 GN=EA366_07325 PE=4 SV=1	24.6277	168680000
60	V.QSILPH.A		347.698	2	694.389	694.388	0.9	49	244.74	>tr|A0A6P2AZ32|A0A6P2AZ32_9CYAN SGNH_hydro domain-containing protein (Fragment) OS=Spirulina sp. DLM2.Bin59 OX=2480215 GN=EA366_00140 PE=4 SV=1	28.648	168150000
61	D.SHIWGVLP.E		454.753	2	908.498	908.499	-0.8	72	258.29	>tr|A0A6P2AZG5|A0A6P2AZG5_9CYAN Signal peptidase I (Fragment) OS=Spirulina sp. DLM2.Bin59 OX=2480215 GN=lepB PE=3 SV=1	25.2179	156330000
62	Q.TFRGR.G		318.681	2	636.355	636.358	-4.6	101	161.64	>tr|A0A6P2APU5|A0A6P2APU5_9CYAN Sugar ABC transporter permease OS=Spirulina sp. DLM2.Bin59 OX=2480215 GN=EA366_11650 PE=3 SV=1	22.8668	155130000
63	Q.LDVSVT.D		633.345	1	633.345	633.345	-0.7	247	117.83	>tr|A0A6P2ARC8|A0A6P2ARC8_9CYAN Cyanophycinase OS=Spirulina sp. DLM2.Bin59 OX=2480215 GN=EA366_11595 PE=3 SV=1	38.094	151390000
64	T.PQPH.P		478.243	1	478.243	478.241	3.4	82	246.96	>tr|A0A6P2AM86|A0A6P2AM86_9CYAN YlxR family protein OS=Spirulina sp. DLM2.Bin59 OX=2480215 GN=EA366_15790 PE=4 SV=1	16.0707	150690000
65	P.HSPAESTMV.N		479.724	2	958.441	958.43	11.7	64	162.06	>tr|A0A6P2B094|A0A6P2B094_9CYAN ABC transporter permease OS=Spirulina sp. DLM2.Bin59 OX=2480215 GN=EA366_04985 PE=3 SV=1	16.0707	150690000
66	H.QIPAWYVVNHT.E		664.356	2	1327.71	1327.68	19.5	417	105.14	>tr|A0A6P2AN13|A0A6P2AN13_9CYAN Valine--tRNA ligase OS=Spirulina sp. DLM2.Bin59 OX=2480215 GN=valS PE=3 SV=1	58.4214	149300000
67	P.TNPNQ.F		573.258	1	573.258	573.263	-7.7	4	154.83	>tr|A0A6P2AYP5|A0A6P2AYP5_9CYAN Chaperone protein ClpB OS=Spirulina sp. DLM2.Bin59 OX=2480215 GN=clpB PE=3 SV=1	35.6868	147740000
68	L.GAQTSTTAVYF.D		573.285	2	1145.56	1145.55	14.3	444	141.03	>tr|A0A6P2AWB2|A0A6P2AWB2_9CYAN Hsp70 family protein OS=Spirulina sp. DLM2.Bin59 OX=2480215 GN=EA366_04605 PE=3 SV=1	35.6868	147740000
69	M.RSQFSFG.L		828.387	1	828.387	828.4	-16	323	102.85	>tr|A0A6P2AVW0|A0A6P2AVW0_9CYAN ShlB/FhaC/HecB family hemolysin secretion/activation protein OS=Spirulina sp. DLM2.Bin59 OX=2480215 GN=EA366_04250 PE=4 SV=1	39.3672	144700000
70	W.LM[+15.995]LPR.P	M[+16]	323.191	2	645.375	645.375	-0.4	402	198.64	>tr|A0A6P2AUK6|A0A6P2AUK6_9CYAN Uncharacterized protein (Fragment) OS=Spirulina sp. DLM2.Bin59 OX=2480215 GN=EA366_06580 PE=4 SV=1	23.2674	136880000
71	D.QLPPF.D		601.326	1	601.326	601.334	-14.2	122	179.37	>tr|A0A6P2AXZ6|A0A6P2AXZ6_9CYAN AarF/ABC1/UbiB kinase family protein (Fragment) OS=Spirulina sp. DLM2.Bin59 OX=2480215 GN=EA366_00290 PE=4 SV=1	44.9815	136400000
72	Q.IEVLR.S		315.202	2	629.398	629.398	-0.4	118	320.99	>tr|A0A6P2ATU9|A0A6P2ATU9_9CYAN Polysaccharide biosynthesis tyrosine autokinase OS=Spirulina sp. DLM2.Bin59 OX=2480215 GN=EA366_08920 PE=4 SV=1	24.9561	132840000
73	I.QFGHSLTPEEQ.D		636.804	2	1272.6	1272.59	11.3	92	115	>tr|A0A6P2ANM3|A0A6P2ANM3_9CYAN Uncharacterized protein (Fragment) OS=Spirulina sp. DLM2.Bin59 OX=2480215 GN=EA366_12025 PE=4 SV=1	19.8469	132430000
74	R.QIPQQQP.Q		838.442	1	838.442	838.442	-0.1	265	154.86	>tr|A0A6P2AL02|A0A6P2AL02_9CYAN Orotate phosphoribosyltransferase OS=Spirulina sp. DLM2.Bin59 OX=2480215 GN=pyrE PE=3 SV=1	18.921	131580000
75	K.LLQPY.L		633.363	1	633.363	633.361	4.2	909	242.63	>tr|A0A6P2AW04|A0A6P2AW04_9CYAN DEAD/DEAH box helicase OS=Spirulina sp. DLM2.Bin59 OX=2480215 GN=EA366_04030 PE=4 SV=1	35.8014	130560000
76	L.SM[+15.995]IPRL.N	M[+16]	366.707	2	732.407	732.407	-0.4	42	169.3	>tr|A0A6P2AV54|A0A6P2AV54_9CYAN Protein-glutamate methylesterase/protein-glutamine glutaminase OS=Spirulina sp. DLM2.Bin59 OX=2480215 GN=cheB PE=3 SV=1	23.3424	129260000
77	L.VAGDLRLV.D		421.759	2	842.51	842.509	1.3	975	237.8	>tr|A0A6P2AYU0|A0A6P2AYU0_9CYAN Uncharacterized protein OS=Spirulina sp. DLM2.Bin59 OX=2480215 GN=EA366_04890 PE=4 SV=1	30.4679	128960000
78	S.VAAIKNQV.I		421.76	2	842.513	842.509	4.2	69	187.36	>tr|A0A6P2AY57|A0A6P2AY57_9CYAN Cytochrome c6 OS=Spirulina sp. DLM2.Bin59 OX=2480215 GN=petJ PE=3 SV=1	29.9661	128960000
79	G.TGPF.M		421.21	1	421.21	421.208	3.6	230	182.76	>tr|A0A6P2AYR4|A0A6P2AYR4_9CYAN ABC transporter substrate-binding protein OS=Spirulina sp. DLM2.Bin59 OX=2480215 GN=EA366_04995 PE=4 SV=1	29.9661	128960000
80	G.ISAGQSQNSYRGL.V		690.852	2	1380.7	1380.69	8	363	181.61	>tr|A0A6P2ATI0|A0A6P2ATI0_9CYAN Fe-S cluster assembly protein SufB OS=Spirulina sp. DLM2.Bin59 OX=2480215 GN=sufB PE=3 SV=1	16.465	128020000
81	R.NKTPQ.E		587.322	1	587.322	587.315	12.4	235	113.23	>tr|A0A6P2AVC6|A0A6P2AVC6_9CYAN Protease 4 OS=Spirulina sp. DLM2.Bin59 OX=2480215 GN=sppA PE=3 SV=1	34.3654	114610000
82	E.QPQLTQSHIALG.H		646.854	2	1292.7	1292.7	4.1	295	126.23	>tr|A0A6P2AVY7|A0A6P2AVY7_9CYAN Insulinase family protein OS=Spirulina sp. DLM2.Bin59 OX=2480215 GN=EA366_05725 PE=4 SV=1	45.1537	113920000
83	A.APY.P		350.171	1	350.171	350.171	-1.6	571	135.05	>tr|A0A6P2AXM7|A0A6P2AXM7_9CYAN Alpha-mannosidase (Fragment) OS=Spirulina sp. DLM2.Bin59 OX=2480215 GN=EA366_01625 PE=3 SV=1	27.0404	112830000
84	L.PYLEH.F		658.321	1	658.321	658.319	2.2	291	290.9	>tr|A0A6P2AUT1|A0A6P2AUT1_9CYAN DNA topoisomerase I (Fragment) OS=Spirulina sp. DLM2.Bin59 OX=2480215 GN=EA366_10055 PE=4 SV=1	18.0635	107940000
85	G.TGFLQHP.Q		400.209	2	799.41	799.41	0.7	255	237.9	>tr|A0A6P2AW28|A0A6P2AW28_9CYAN Restriction endonuclease (Fragment) OS=Spirulina sp. DLM2.Bin59 OX=2480215 GN=EA366_08060 PE=4 SV=1	29.1112	105920000
86	G.IYP.Q		392.218	1	392.218	392.218	1.1	156	212.09	>tr|A0A6P2B207|A0A6P2B207_9CYAN O-antigen ligase family protein OS=Spirulina sp. DLM2.Bin59 OX=2480215 GN=EA366_01800 PE=4 SV=1	25.8216	101030000
87	R.PHQFPQ.S		377.187	2	753.367	753.368	-0.6	62	289.76	>tr|A0A6P2AVF1|A0A6P2AVF1_9CYAN ATP-binding protein (Fragment) OS=Spirulina sp. DLM2.Bin59 OX=2480215 GN=EA366_06615 PE=4 SV=1	18.3772	100630000
88	T.QQLTTYATEFK.V		665.344	2	1329.68	1329.67	9	687	136.16	>tr|A0A6P2AYL1|A0A6P2AYL1_9CYAN Histidine kinase domain-containing protein OS=Spirulina sp. DLM2.Bin59 OX=2480215 GN=EA366_00710 PE=4 SV=1	31.2313	96006000
89	A.GVDTVAHE.A		827.377	1	827.377	827.389	-15.2	157	117.26	>tr|A0A6P2AYT5|A0A6P2AYT5_9CYAN DNA-protecting protein DprA OS=Spirulina sp. DLM2.Bin59 OX=2480215 GN=dprA PE=3 SV=1	40.8581	94537000
90	S.GIGAVDGFVINAG.A		595.317	2	1189.63	1189.62	4.4	71	106.47	>tr|A0A6P2AX22|A0A6P2AX22_9CYAN 3-dehydroquinate dehydratase OS=Spirulina sp. DLM2.Bin59 OX=2480215 GN=aroQ PE=3 SV=1	51.5269	92581000
91	Q.QVGPADAQQLM.Q		579.292	2	1157.58	1157.56	13.3	310	143.18	>tr|A0A6P2B1C5|A0A6P2B1C5_9CYAN SPFH domain-containing protein (Fragment) OS=Spirulina sp. DLM2.Bin59 OX=2480215 GN=EA366_00170 PE=4 SV=1	50.1871	88871000
92	A.QVWVAPGQWS.F		579.292	2	1157.58	1157.57	3.1	119	118.16	>tr|A0A6P2AZ46|A0A6P2AZ46_9CYAN DUF4336 domain-containing protein OS=Spirulina sp. DLM2.Bin59 OX=2480215 GN=EA366_02940 PE=4 SV=1	50.161	88871000
93	P.QPQPELRSQL.K		598.329	2	1195.65	1195.64	6.3	186	128.98	>tr|A0A6P2AIP1|A0A6P2AIP1_9CYAN Glycosyltransferase family 4 protein OS=Spirulina sp. DLM2.Bin59 OX=2480215 GN=EA366_14745 PE=4 SV=1	42.2304	88409000
94	G.QFPPQSQQRNSEPA.E		807.388	2	1613.77	1613.77	1.1	733	118.43	>tr|A0A6P2AJR1|A0A6P2AJR1_9CYAN DUF1574 domain-containing protein OS=Spirulina sp. DLM2.Bin59 OX=2480215 GN=EA366_15565 PE=4 SV=1	36.8614	85776000
95	P.EYSLR.R		334.173	2	667.339	667.341	-2.3	165	113.85	>tr|A0A6P2APZ8|A0A6P2APZ8_9CYAN TPR_REGION domain-containing protein (Fragment) OS=Spirulina sp. DLM2.Bin59 OX=2480215 GN=EA366_12240 PE=4 SV=1	17.3729	85701000
96	Q.TFP.I		364.187	1	364.187	364.187	0.5	553	282.97	>tr|A0A6P2AM50|A0A6P2AM50_9CYAN HAMP domain-containing protein OS=Spirulina sp. DLM2.Bin59 OX=2480215 GN=EA366_12590 PE=4 SV=1	28.3355	85667000
97	I.LFGSQ.I		551.287	1	551.287	551.282	8.5	130	148.11	>tr|A0A6P2AYL7|A0A6P2AYL7_9CYAN Uncharacterized protein OS=Spirulina sp. DLM2.Bin59 OX=2480215 GN=EA366_00655 PE=4 SV=1	29.6191	85451000
98	R.QIPDNRFLVG.L		579.819	2	1158.63	1158.63	4.5	422	211.6	>tr|A0A6P2APZ7|A0A6P2APZ7_9CYAN ShlB/FhaC/HecB family hemolysin secretion/activation protein (Fragment) OS=Spirulina sp. DLM2.Bin59 OX=2480215 GN=EA366_11455 PE=4 SV=1	41.1609	85213000
99	I.NIFSQPL.M		818.44	1	818.44	818.441	-0.5	60	217.79	>tr|A0A6P2AZ14|A0A6P2AZ14_9CYAN Mechanosensitive ion channel family protein OS=Spirulina sp. DLM2.Bin59 OX=2480215 GN=EA366_03065 PE=3 SV=1	44.1992	84328000
100	A.YVPA.S		449.241	1	449.241	449.24	3.9	145	179.57	>tr|A0A6P2ASY2|A0A6P2ASY2_9CYAN DUF928 domain-containing protein OS=Spirulina sp. DLM2.Bin59 OX=2480215 GN=EA366_08705 PE=4 SV=1	18.1854	83382000
101	E.AFISPQ.P		662.352	1	662.352	662.351	1.1	285	139.08	>tr|A0A6P2AW45|A0A6P2AW45_9CYAN Stage II sporulation protein M OS=Spirulina sp. DLM2.Bin59 OX=2480215 GN=EA366_03815 PE=4 SV=1	35.2215	82428000
102	Q.KDAFM[+15.995]K.G	M[+16]	755.385	1	755.385	755.376	12.9	478	159.13	>tr|A0A6P2ATE2|A0A6P2ATE2_9CYAN DUF697 domain-containing protein OS=Spirulina sp. DLM2.Bin59 OX=2480215 GN=EA366_08930 PE=4 SV=1	34.7645	82293000
103	G.QIY.L		423.225	1	423.225	423.224	3	295	133.72	>tr|A0A6P2AZJ7|A0A6P2AZJ7_9CYAN Phosphoenolpyruvate synthase OS=Spirulina sp. DLM2.Bin59 OX=2480215 GN=EA366_06245 PE=4 SV=1	23.5496	82286000
104	A.ISSPLLESSI.E		523.288	2	1045.57	1045.58	-8.2	273	138.34	>tr|A0A6P2AIP7|A0A6P2AIP7_9CYAN Cell division protein FtsZ OS=Spirulina sp. DLM2.Bin59 OX=2480215 GN=ftsZ PE=3 SV=1	23.8053	81762000
105	R.GATIFTPN.L		410.72	2	820.433	820.42	15.6	209	175.85	>tr|A0A6P2AHY5|A0A6P2AHY5_9CYAN D-glycero-beta-D-manno-heptose-7-phosphate kinase OS=Spirulina sp. DLM2.Bin59 OX=2480215 GN=EA366_15320 PE=4 SV=1	18.6363	76316000
106	V.PTAFSLAT.L		807.42	1	807.42	807.425	-5.2	424	212.36	>tr|A0A6P2ASP1|A0A6P2ASP1_9CYAN DUF4114 domain-containing protein (Fragment) OS=Spirulina sp. DLM2.Bin59 OX=2480215 GN=EA366_11560 PE=4 SV=1	40.7816	75373000
107	P.TFAYE.L		315.647	2	630.288	630.277	17	502	168.1	>tr|A0A6P2AKU1|A0A6P2AKU1_9CYAN Type I site-specific deoxyribonuclease OS=Spirulina sp. DLM2.Bin59 OX=2480215 GN=EA366_14665 PE=3 SV=1	18.9692	74750000
108	S.QPQPLTL.F		796.456	1	796.456	796.456	-0.5	134	256.07	>tr|A0A6P2AUP5|A0A6P2AUP5_9CYAN Uncharacterized protein OS=Spirulina sp. DLM2.Bin59 OX=2480215 GN=EA366_09120 PE=4 SV=1	32.2124	74094000
109	E.QVEYL.W		651.336	1	651.336	651.335	1.8	135	227.48	>tr|A0A6P2ALP3|A0A6P2ALP3_9CYAN Coproporphyrinogen-III oxidase OS=Spirulina sp. DLM2.Bin59 OX=2480215 GN=hemN PE=3 SV=1	44.2492	72576000
110	D.QVEGPFFYGRV.A		649.831	2	1298.65	1298.65	1.4	259	126.33	>tr|A0A6P2AV57|A0A6P2AV57_9CYAN DUF3370 domain-containing protein OS=Spirulina sp. DLM2.Bin59 OX=2480215 GN=EA366_05665 PE=4 SV=1	44.2492	72576000
111	N.PQQEFQVFHQGQ.S		736.854	2	1472.7	1472.69	6	162	134.51	>tr|A0A6P2AT82|A0A6P2AT82_9CYAN RAMP superfamily protein OS=Spirulina sp. DLM2.Bin59 OX=2480215 GN=EA366_09520 PE=4 SV=1	21.5643	71380000
112	T.GVSGVGDGILEQYRQ.D		789.404	2	1577.8	1577.79	6.1	212	129.71	>tr|A0A6P2AQ54|A0A6P2AQ54_9CYAN BREX system P-loop protein BrxC (Fragment) OS=Spirulina sp. DLM2.Bin59 OX=2480215 GN=brxC PE=4 SV=1	29.2846	70795000
113	D.SDIPASR.Q		373.195	2	745.383	745.384	-1.7	13	138.59	>tr|A0A6P2APV7|A0A6P2APV7_9CYAN GntR family transcriptional regulator OS=Spirulina sp. DLM2.Bin59 OX=2480215 GN=EA366_11235 PE=4 SV=1	15.2353	69946000
114	L.KDNQVTH.M		841.423	1	841.423	841.416	7.7	273	117.89	>tr|A0A6P2AS33|A0A6P2AS33_9CYAN PAS domain S-box protein OS=Spirulina sp. DLM2.Bin59 OX=2480215 GN=EA366_11435 PE=4 SV=1	31.9964	69577000
115	M.KTPLTE.A		688.386	1	688.386	688.388	-2.2	2	236.7	>tr|A0A6P2ASL8|A0A6P2ASL8_9CYAN Phycocyanin subunit alpha OS=Spirulina sp. DLM2.Bin59 OX=2480215 GN=EA366_09545 PE=3 SV=1	17.2651	69329000
116	D.QERQQ.P		688.335	1	688.335	688.337	-4	477	149.25	>tr|A0A6P2ATI3|A0A6P2ATI3_9CYAN Glycosyltransferase family 39 protein OS=Spirulina sp. DLM2.Bin59 OX=2480215 GN=EA366_10045 PE=4 SV=1	17.2651	69329000
117	Q.TAAPQFPNRPP.R		598.303	2	1195.6	1195.62	-19.6	140	151.11	>tr|A0A6P2AQX5|A0A6P2AQX5_9CYAN DUF3685 domain-containing protein OS=Spirulina sp. DLM2.Bin59 OX=2480215 GN=EA366_11010 PE=4 SV=1	32.0635	69045000
118	Q.VYV.A		380.218	1	380.218	380.218	0.6	454	176.19	>tr|A0A6P2AX54|A0A6P2AX54_9CYAN DUF3854 domain-containing protein OS=Spirulina sp. DLM2.Bin59 OX=2480215 GN=EA366_04245 PE=4 SV=1	25.3717	66436000
119	E.AGFL.S		407.229	1	407.229	407.229	0.2	214	112.57	>tr|A0A6P2ALP3|A0A6P2ALP3_9CYAN Coproporphyrinogen-III oxidase OS=Spirulina sp. DLM2.Bin59 OX=2480215 GN=hemN PE=3 SV=1	39.2415	66175000
120	A.GAFL.A		407.229	1	407.229	407.229	0.2	122	112.57	>tr|A0A6P2AYJ2|A0A6P2AYJ2_9CYAN NADH-quinone oxidoreductase subunit M OS=Spirulina sp. DLM2.Bin59 OX=2480215 GN=EA366_00850 PE=3 SV=1	39.2415	66175000
121	L.QQQPPL.A		710.383	1	710.383	710.383	-0.4	190	132.84	>tr|A0A6P2AYX2|A0A6P2AYX2_9CYAN Uncharacterized protein OS=Spirulina sp. DLM2.Bin59 OX=2480215 GN=EA366_03325 PE=4 SV=1	26.2897	65556000
122	Q.AYFQTHAQ.P		483.228	2	965.448	965.448	0.6	313	151.13	>tr|A0A6P2ATX1|A0A6P2ATX1_9CYAN Bifunctional aldolase/short-chain dehydrogenase OS=Spirulina sp. DLM2.Bin59 OX=2480215 GN=EA366_09755 PE=4 SV=1	30.664	64568000
123	D.VHSFES.F		705.319	1	705.319	705.32	-2.1	156	170.25	>tr|A0A6P2AY79|A0A6P2AY79_9CYAN Recombinase OS=Spirulina sp. DLM2.Bin59 OX=2480215 GN=EA366_01765 PE=4 SV=1	17.0707	64531000
124	P.SAAVDTS.V		325.66	2	650.313	650.299	22	96	159.77	>tr|A0A6P2AXP4|A0A6P2AXP4_9CYAN 16S rRNA m5C967 methyltransferase OS=Spirulina sp. DLM2.Bin59 OX=2480215 GN=EA366_08580 PE=3 SV=1	14.5633	64383000
125	P.LLDQVR.R		372.224	2	743.441	743.441	-0.1	227	221.23	>tr|A0A6P2ARP6|A0A6P2ARP6_9CYAN Pantoate--beta-alanine ligase (Fragment) OS=Spirulina sp. DLM2.Bin59 OX=2480215 GN=EA366_09775 PE=3 SV=1	22.7804	64368000
126	L.QGQAATPSGGTI.P		544.263	2	1087.52	1087.54	-16.9	171	117.23	>tr|A0A6P2APJ8|A0A6P2APJ8_9CYAN Permease OS=Spirulina sp. DLM2.Bin59 OX=2480215 GN=EA366_11350 PE=3 SV=1	26.3079	63400000
127	K.TNGEMLAYW.Q		542.74	2	1084.47	1084.48	-3.6	227	105.16	>tr|A0A6P2AKM4|A0A6P2AKM4_9CYAN Phosphoketolase OS=Spirulina sp. DLM2.Bin59 OX=2480215 GN=EA366_15060 PE=4 SV=1	26.3079	63400000
128	L.PIYFTH.A		777.389	1	777.389	777.393	-4.7	218	112.27	>tr|A0A6P2AYI3|A0A6P2AYI3_9CYAN FAD-binding oxidoreductase (Fragment) OS=Spirulina sp. DLM2.Bin59 OX=2480215 GN=EA366_07625 PE=4 SV=1	21.9107	63298000
129	E.YIQ.V		423.224	1	423.224	423.224	-0.4	405	115.35	>tr|A0A6P2AV51|A0A6P2AV51_9CYAN DUF3536 domain-containing protein OS=Spirulina sp. DLM2.Bin59 OX=2480215 GN=EA366_09155 PE=4 SV=1	17.3859	62755000
130	T.QGQATAI.I		688.368	1	688.368	688.362	8.1	599	138.16	>tr|A0A6P2AQX3|A0A6P2AQX3_9CYAN Histidine kinase OS=Spirulina sp. DLM2.Bin59 OX=2480215 GN=EA366_10795 PE=4 SV=1	33.1506	62163000
131	G.QITTISGRYY.A		601.316	2	1201.63	1201.62	3.6	181	117.54	>tr|A0A6P2AMN0|A0A6P2AMN0_9CYAN 2,3-bisphosphoglycerate-independent phosphoglycerate mutase OS=Spirulina sp. DLM2.Bin59 OX=2480215 GN=gpmI PE=3 SV=1	31.6128	62126000
132	L.QVNSQQL.D		408.717	2	816.427	816.421	7.3	687	132.86	>tr|A0A6P2AUL3|A0A6P2AUL3_9CYAN Single-stranded-DNA-specific exonuclease RecJ OS=Spirulina sp. DLM2.Bin59 OX=2480215 GN=recJ PE=3 SV=1	37.6369	61868000
133	A.QSQYSV.L		711.331	1	711.331	711.331	-0.1	61	180.19	>tr|A0A6P2AS04|A0A6P2AS04_9CYAN Uncharacterized protein OS=Spirulina sp. DLM2.Bin59 OX=2480215 GN=EA366_09990 PE=4 SV=1	17.5008	61649000
134	A.TNPEIEPITA.F		542.783	2	1084.56	1084.55	6.8	192	154.33	>tr|A0A6P2ATT7|A0A6P2ATT7_9CYAN BMP family ABC transporter substrate-binding protein OS=Spirulina sp. DLM2.Bin59 OX=2480215 GN=EA366_08570 PE=3 SV=1	23.2462	59762000
135	I.FYWVSRPQ.P		541.77	2	1082.53	1082.54	-8	555	114.73	>tr|A0A6P2AXC6|A0A6P2AXC6_9CYAN Phosphate ABC transporter permease PstA OS=Spirulina sp. DLM2.Bin59 OX=2480215 GN=pstA PE=3 SV=1	23.7549	59762000
136	M.SQTTVPFWIWE.Q		697.352	2	1393.7	1393.68	12.6	179	164.57	>tr|A0A6P2AVU8|A0A6P2AVU8_9CYAN Carotenoid biosynthesis protein OS=Spirulina sp. DLM2.Bin59 OX=2480215 GN=EA366_05550 PE=4 SV=1	45.7666	59613000
137	L.TVERFN.E		383.198	2	765.388	765.389	-1.3	85	204.85	>tr|A0A6P2AGT4|A0A6P2AGT4_9CYAN DUF4168 domain-containing protein OS=Spirulina sp. DLM2.Bin59 OX=2480215 GN=EA366_16200 PE=4 SV=1	19.4657	59382000
138	V.QTALHT.L		670.352	1	670.352	670.352	-0.1	189	134.01	>tr|A0A6P2AQ88|A0A6P2AQ88_9CYAN TIGR02921 family PEP-CTERM protein OS=Spirulina sp. DLM2.Bin59 OX=2480215 GN=EA366_10935 PE=4 SV=1	19.739	58314000
139	L.LQPLPQ.T		348.213	2	695.419	695.409	15.4	45	109.39	>tr|A0A6P2ASI4|A0A6P2ASI4_9CYAN Cation:proton antiporter OS=Spirulina sp. DLM2.Bin59 OX=2480215 GN=EA366_10860 PE=4 SV=1	18.9402	58175000
140	A.QPQGGAAALQVSAPE.A		712.35	2	1423.69	1423.72	-17.7	131	106.41	>tr|A0A6P2AR65|A0A6P2AR65_9CYAN Uncharacterized protein OS=Spirulina sp. DLM2.Bin59 OX=2480215 GN=EA366_13200 PE=4 SV=1	15.9579	58118000
141	R.QGAGAAYPFQI.P		561.788	2	1122.57	1122.56	9.6	546	124.76	>tr|A0A6P2AWT8|A0A6P2AWT8_9CYAN FAD-dependent oxidoreductase OS=Spirulina sp. DLM2.Bin59 OX=2480215 GN=EA366_05960 PE=4 SV=1	20.7591	57624000
142	P.LPYQTGKNPGA.L		573.303	2	1145.6	1145.59	3.3	341	159.21	>tr|A0A6P2AZ57|A0A6P2AZ57_9CYAN Glycerol-3-phosphate dehydrogenase OS=Spirulina sp. DLM2.Bin59 OX=2480215 GN=EA366_00695 PE=3 SV=1	38.5534	57353000
143	A.QPFLQELGQAV.A		615.32	2	1229.63	1229.65	-16.4	269	247.43	>tr|A0A6P2AR72|A0A6P2AR72_9CYAN Malto-oligosyltrehalose trehalohydrolase OS=Spirulina sp. DLM2.Bin59 OX=2480215 GN=treZ PE=3 SV=1	52.9412	55532000
144	E.IGGGY.T		466.231	1	466.231	466.23	4	50	296.83	>tr|A0A6P2AZ17|A0A6P2AZ17_9CYAN RNB domain-containing ribonuclease OS=Spirulina sp. DLM2.Bin59 OX=2480215 GN=EA366_06925 PE=4 SV=1	22.3662	55118000
145	L.NLLILGQNYH.L		592.829	2	1184.65	1184.64	6.9	230	214.53	>tr|A0A6P2AXF7|A0A6P2AXF7_9CYAN Beta-carotene hydroxylase OS=Spirulina sp. DLM2.Bin59 OX=2480215 GN=EA366_06030 PE=4 SV=1	32.5125	54296000
146	G.QITFS.T		595.293	1	595.293	595.309	-26.8	498	172.23	>tr|A0A6P2AYU0|A0A6P2AYU0_9CYAN Uncharacterized protein OS=Spirulina sp. DLM2.Bin59 OX=2480215 GN=EA366_04890 PE=4 SV=1	28.2732	52444000
147	V.FTIAIM.G		695.377	1	695.377	695.38	-3.7	64	131.64	>tr|A0A6P2ARJ9|A0A6P2ARJ9_9CYAN Cation:proton antiporter OS=Spirulina sp. DLM2.Bin59 OX=2480215 GN=EA366_10835 PE=4 SV=1	61.0355	51474000
148	S.QLL.P		373.244	1	373.244	373.245	-0.9	513	123.18	>tr|A0A6P2AZJ7|A0A6P2AZJ7_9CYAN Phosphoenolpyruvate synthase OS=Spirulina sp. DLM2.Bin59 OX=2480215 GN=EA366_06245 PE=4 SV=1	30.2838	50941000
149	L.ALQLPQQ.I		797.452	1	797.452	797.452	0	340	128	>tr|A0A6P2AQJ2|A0A6P2AQJ2_9CYAN Serine/threonine-protein phosphatase OS=Spirulina sp. DLM2.Bin59 OX=2480215 GN=EA366_10765 PE=4 SV=1	26.7975	49929000
150	G.IPQTLPI.P		391.245	2	781.482	781.482	0.2	130	212.1	>tr|A0A6P2AX28|A0A6P2AX28_9CYAN UDP-glucose 4-epimerase OS=Spirulina sp. DLM2.Bin59 OX=2480215 GN=galE PE=3 SV=1	22.0359	48233000
151	T.PEDMLQQFSKNML.V		790.878	2	1580.75	1580.74	2.1	46	146.11	>tr|A0A6P2AXC8|A0A6P2AXC8_9CYAN Prepilin peptidase (Fragment) OS=Spirulina sp. DLM2.Bin59 OX=2480215 GN=EA366_05380 PE=4 SV=1	11.1137	47924000
152	D.TPFGSPSDALIT.G		603.315	2	1205.62	1205.6	14.6	30	181.32	>tr|A0A6P2AWG1|A0A6P2AWG1_9CYAN S-methyl-5'-thioadenosine phosphorylase OS=Spirulina sp. DLM2.Bin59 OX=2480215 GN=mtnP PE=3 SV=1	45.99	47443000
153	Q.LITPGTLT.E		408.25	2	815.492	815.487	6.4	132	130.46	>tr|A0A6P2AUR1|A0A6P2AUR1_9CYAN DNA mismatch repair protein MutS OS=Spirulina sp. DLM2.Bin59 OX=2480215 GN=mutS PE=3 SV=1	34.721	46824000
154	N.IITWRQ.D		408.746	2	816.485	816.473	14.6	176	111.94	>tr|A0A6P2AJS3|A0A6P2AJS3_9CYAN Uncharacterized protein OS=Spirulina sp. DLM2.Bin59 OX=2480215 GN=EA366_14240 PE=4 SV=1	34.721	46824000
155	G.NLQPQSLFY.D		555.289	2	1109.57	1109.56	6.6	132	133.68	>tr|A0A6P2ALL7|A0A6P2ALL7_9CYAN Uncharacterized protein (Fragment) OS=Spirulina sp. DLM2.Bin59 OX=2480215 GN=EA366_14230 PE=4 SV=1	51.2717	46612000
156	T.IQEGFK.A		361.197	2	721.388	721.388	-0.3	66	228.21	>tr|A0A6P2ATS2|A0A6P2ATS2_9CYAN Efflux RND transporter periplasmic adaptor subunit OS=Spirulina sp. DLM2.Bin59 OX=2480215 GN=EA366_07860 PE=3 SV=1	22.9984	45997000
157	S.IEPVLMK.Y		415.247	2	829.486	829.485	1.2	240	199.9	>tr|A0A6P2B0K8|A0A6P2B0K8_9CYAN Uncharacterized protein (Fragment) OS=Spirulina sp. DLM2.Bin59 OX=2480215 GN=EA366_01560 PE=4 SV=1	36.9316	45870000
158	Y.QPFNPT.A		703.34	1	703.34	703.341	-0.9	284	212.34	>tr|A0A6P2AN54|A0A6P2AN54_9CYAN CHAT domain-containing protein (Fragment) OS=Spirulina sp. DLM2.Bin59 OX=2480215 GN=EA366_13410 PE=3 SV=1	48.7548	44870000
159	K.EFIF.A		555.283	1	555.283	555.281	3.3	583	189.38	>tr|A0A6P2AV51|A0A6P2AV51_9CYAN DUF3536 domain-containing protein OS=Spirulina sp. DLM2.Bin59 OX=2480215 GN=EA366_09155 PE=4 SV=1	61.0274	43576000
160	T.FEELR.I		347.182	2	693.357	693.357	-0.1	477	177.79	>tr|A0A6P2B1K3|A0A6P2B1K3_9CYAN Glutamate synthase large subunit OS=Spirulina sp. DLM2.Bin59 OX=2480215 GN=EA366_02595 PE=3 SV=1	22.5113	43432000
161	G.QQVTMAPATSF.A		590.795	2	1180.58	1180.57	13.9	121	156.38	>tr|A0A6P2ARZ0|A0A6P2ARZ0_9CYAN Uncharacterized protein OS=Spirulina sp. DLM2.Bin59 OX=2480215 GN=EA366_11170 PE=4 SV=1	10.6128	43381000
162	R.LPEGAKDY.V		446.73	2	892.452	892.441	12.4	349	117.2	>tr|A0A6P2ARW5|A0A6P2ARW5_9CYAN Type IV pilus secretin family protein (Fragment) OS=Spirulina sp. DLM2.Bin59 OX=2480215 GN=EA366_10005 PE=3 SV=1	19.1418	43079000
163	P.GAPDQSYIQLW.D		639.3	2	1277.59	1277.62	-18.5	669	101.57	>tr|A0A6P2ATM4|A0A6P2ATM4_9CYAN CHAT domain-containing protein (Fragment) OS=Spirulina sp. DLM2.Bin59 OX=2480215 GN=EA366_11740 PE=4 SV=1	38.7277	43026000
164	P.QLPSRGSKP.D		485.279	2	969.551	969.548	3.8	121	255.58	>tr|A0A6P2AX05|A0A6P2AX05_9CYAN Cell wall hydrolase OS=Spirulina sp. DLM2.Bin59 OX=2480215 GN=EA366_04505 PE=4 SV=1	21.2347	42258000
165	I.AGAGLYFLR.S		484.271	2	967.536	967.536	-0.4	19	107.1	>tr|A0A6P2AMH7|A0A6P2AMH7_9CYAN Uncharacterized protein OS=Spirulina sp. DLM2.Bin59 OX=2480215 GN=EA366_13785 PE=4 SV=1	20.7285	42258000
166	G.QLQAYT.V		723.378	1	723.378	723.367	15	276	107.7	>tr|A0A6P2AM84|A0A6P2AM84_9CYAN Asparagine synthetase B (Fragment) OS=Spirulina sp. DLM2.Bin59 OX=2480215 GN=EA366_12970 PE=3 SV=1	17.6216	42145000
167	R.LQLENDLRKG.L		593.336	2	1185.66	1185.66	4.4	479	239.77	>tr|A0A6P2APD3|A0A6P2APD3_9CYAN EAL domain-containing protein OS=Spirulina sp. DLM2.Bin59 OX=2480215 GN=EA366_12615 PE=4 SV=1	34.1162	42061000
168	E.NVLGHL.P		326.692	2	652.377	652.378	-0.6	67	130.63	>tr|A0A6P2AXT5|A0A6P2AXT5_9CYAN D-alanyl-D-alanine carboxypeptidase family protein OS=Spirulina sp. DLM2.Bin59 OX=2480215 GN=EA366_04525 PE=4 SV=1	23.6623	41592000
169	R.TDLPHL.M		348.19	2	695.372	695.372	0	223	207.38	>tr|A0A6P2AV10|A0A6P2AV10_9CYAN Hybrid sensor histidine kinase/response regulator OS=Spirulina sp. DLM2.Bin59 OX=2480215 GN=EA366_05865 PE=4 SV=1	31.2392	41463000
170	P.LC[+57.021]PDFAL.E	C[+57]	418.2	2	835.393	835.402	-10.3	112	168.14	>tr|A0A6P2AZA4|A0A6P2AZA4_9CYAN Uma2 family endonuclease OS=Spirulina sp. DLM2.Bin59 OX=2480215 GN=EA366_02550 PE=4 SV=1	17.6526	41387000
171	T.ILTHC[+57.021]NAGGLA.T	C[+57]	563.789	2	1126.57	1126.57	3.2	156	202.06	>tr|A0A6P2AVL9|A0A6P2AVL9_9CYAN Methylthioribose-1-phosphate isomerase OS=Spirulina sp. DLM2.Bin59 OX=2480215 GN=mtnA PE=3 SV=1	29.0821	40756000
172	Q.TAASMGQR.V		411.199	2	821.391	821.393	-3	592	146.62	>tr|A0A6P2ATU9|A0A6P2ATU9_9CYAN Polysaccharide biosynthesis tyrosine autokinase OS=Spirulina sp. DLM2.Bin59 OX=2480215 GN=EA366_08920 PE=4 SV=1	13.2948	40563000
173	H.LEDWKRQWA.I		616.326	2	1231.64	1231.62	18.3	144	142.77	>tr|A0A6P2AVI2|A0A6P2AVI2_9CYAN Histidine kinase domain-containing protein OS=Spirulina sp. DLM2.Bin59 OX=2480215 GN=EA366_06840 PE=4 SV=1	34.3063	40413000
174	S.QSFSI.T		581.296	1	581.296	581.293	4.6	155	224.73	>tr|A0A6P2ANX9|A0A6P2ANX9_9CYAN Uncharacterized protein (Fragment) OS=Spirulina sp. DLM2.Bin59 OX=2480215 GN=EA366_13750 PE=4 SV=1	29.68	40343000
175	R.SLPVAGQ.S		336.189	2	671.371	671.372	-2	197	155.25	>tr|A0A6P2AZT9|A0A6P2AZT9_9CYAN Peptidase S13 OS=Spirulina sp. DLM2.Bin59 OX=2480215 GN=EA366_05775 PE=3 SV=1	17.0074	40111000
176	K.ISIIPR.G		349.731	2	698.456	698.456	-0.6	443	187.98	>tr|A0A6P2B2T6|A0A6P2B2T6_9CYAN ATP-dependent zinc metalloprotease FtsH OS=Spirulina sp. DLM2.Bin59 OX=2480215 GN=ftsH PE=3 SV=1	34.7084	40059000
177	F.PRLTIHAQ.H		468.275	2	935.542	935.542	0	133	135.1	>tr|A0A6P2AN43|A0A6P2AN43_9CYAN WecB/TagA/CpsF family glycosyltransferase OS=Spirulina sp. DLM2.Bin59 OX=2480215 GN=EA366_15140 PE=4 SV=1	9.9749	39401000
178	L.QVAGFQQ.S		389.199	2	777.39	777.389	0.9	371	205.41	>tr|A0A6P2AXS5|A0A6P2AXS5_9CYAN Glycosyltransferase family 1 protein OS=Spirulina sp. DLM2.Bin59 OX=2480215 GN=EA366_04595 PE=4 SV=1	23.5328	38834000
179	R.LQQQVQALGEEEH.I		754.865	2	1508.72	1508.73	-7.5	304	165.86	>tr|A0A6P2AXD8|A0A6P2AXD8_9CYAN Chromosome partition protein Smc OS=Spirulina sp. DLM2.Bin59 OX=2480215 GN=smc PE=3 SV=1	22.3233	38825000
180	E.VSLILRP.L		399.267	2	797.526	797.524	1.7	229	202.91	>tr|A0A6P2AW78|A0A6P2AW78_9CYAN Glutamyl-tRNA reductase OS=Spirulina sp. DLM2.Bin59 OX=2480215 GN=hemA PE=3 SV=1	40.1078	38483000
181	N.QPAGGAQLWAAGAYVTPGPGAGNTLLIE.A		670.846	4	2680.36	2680.37	-3.7	949	144.54	>tr|A0A6P2AYF0|A0A6P2AYF0_9CYAN Uncharacterized protein (Fragment) OS=Spirulina sp. DLM2.Bin59 OX=2480215 GN=EA366_04220 PE=4 SV=1	39.8421	38441000
182	N.PQQQAVQAQG.D		527.769	2	1054.53	1054.53	2.5	145	135.99	>tr|A0A6P2ARB1|A0A6P2ARB1_9CYAN Uncharacterized protein OS=Spirulina sp. DLM2.Bin59 OX=2480215 GN=EA366_11885 PE=4 SV=1	14.0495	38336000
183	M.NFP.T		377.183	1	377.183	377.182	3	246	255.58	>tr|A0A6P2ARZ2|A0A6P2ARZ2_9CYAN Uncharacterized protein OS=Spirulina sp. DLM2.Bin59 OX=2480215 GN=EA366_11520 PE=4 SV=1	28.7933	38172000
184	L.NFQTMI.I		377.183	2	753.359	753.36	-1.5	136	103.58	>tr|A0A6P2AX20|A0A6P2AX20_9CYAN Glycine dehydrogenase (decarboxylating) OS=Spirulina sp. DLM2.Bin59 OX=2480215 GN=gcvP PE=3 SV=1	28.7933	38172000
185	I.QGQEPLGV.K		414.223	2	827.438	827.426	15.2	113	156.8	>tr|A0A6P2AXR3|A0A6P2AXR3_9CYAN FAD-dependent oxidoreductase (Fragment) OS=Spirulina sp. DLM2.Bin59 OX=2480215 GN=EA366_01455 PE=4 SV=1	15.9605	37986000
186	P.QFQPL.E		632.342	1	632.342	632.34	2.3	321	244.02	>tr|A0A6P2APF3|A0A6P2APF3_9CYAN PAS domain S-box protein OS=Spirulina sp. DLM2.Bin59 OX=2480215 GN=EA366_11450 PE=3 SV=1	34.456	37675000
187	T.QPQLQI.T		726.414	1	726.414	726.414	-1.2	380	168.02	>tr|A0A6P2AUT2|A0A6P2AUT2_9CYAN Fe-S cluster assembly protein SufD OS=Spirulina sp. DLM2.Bin59 OX=2480215 GN=sufD PE=3 SV=1	34.8069	36928000
188	G.SGVGALVEFDDQSK.T		726.357	2	1451.71	1451.7	4.1	39	123.5	>tr|A0A6P2AQK0|A0A6P2AQK0_9CYAN DUF2862 domain-containing protein OS=Spirulina sp. DLM2.Bin59 OX=2480215 GN=EA366_11540 PE=4 SV=1	34.8069	36928000
189	D.HVEKAHALC[+57.021]AFG.E	C[+57]	670.333	2	1339.66	1339.66	0.5	369	172.6	>tr|A0A6P2ATV7|A0A6P2ATV7_9CYAN NAD(P)/FAD-dependent oxidoreductase OS=Spirulina sp. DLM2.Bin59 OX=2480215 GN=EA366_08500 PE=4 SV=1	10.446	36722000
190	L.LMI.D		376.223	1	376.223	376.226	-10.6	77	186.57	>tr|A0A6P2AX72|A0A6P2AX72_9CYAN SulP family inorganic anion transporter OS=Spirulina sp. DLM2.Bin59 OX=2480215 GN=EA366_03340 PE=4 SV=1	40.872	36632000
191	D.LPLYDLEL.V		488.281	2	975.555	975.54	15.8	757	141.7	>tr|A0A6P2AW34|A0A6P2AW34_9CYAN TIGR03960 family B12-binding radical SAM protein OS=Spirulina sp. DLM2.Bin59 OX=2480215 GN=EA366_03915 PE=4 SV=1	37.3502	35977000
192	G.LYFLR.S		356.211	2	711.414	711.419	-6.1	23	111.15	>tr|A0A6P2AMH7|A0A6P2AMH7_9CYAN Uncharacterized protein OS=Spirulina sp. DLM2.Bin59 OX=2480215 GN=EA366_13785 PE=4 SV=1	21.6992	35896000
193	V.IFYLR.L		356.211	2	711.414	711.419	-6.1	76	111.15	>tr|A0A6P2AN43|A0A6P2AN43_9CYAN WecB/TagA/CpsF family glycosyltransferase OS=Spirulina sp. DLM2.Bin59 OX=2480215 GN=EA366_15140 PE=4 SV=1	21.6992	35896000
194	A.LDQGKFQA.A		453.739	2	906.471	906.468	3	186	179.18	>tr|A0A6P2AMD5|A0A6P2AMD5_9CYAN Uncharacterized protein (Fragment) OS=Spirulina sp. DLM2.Bin59 OX=2480215 GN=EA366_14575 PE=4 SV=1	28.1225	35796000
195	N.PFLDLF.A		376.205	2	751.402	751.403	-0.9	1640	103.2	>tr|A0A6P2AYU0|A0A6P2AYU0_9CYAN Uncharacterized protein OS=Spirulina sp. DLM2.Bin59 OX=2480215 GN=EA366_04890 PE=4 SV=1	45.1304	35179000
196	I.VSGGQALPQGQGA.I		585.304	2	1169.6	1169.59	8.1	336	136.93	>tr|A0A6P2AWF9|A0A6P2AWF9_9CYAN ABC transporter ATP-binding protein OS=Spirulina sp. DLM2.Bin59 OX=2480215 GN=EA366_04770 PE=4 SV=1	36.1423	34346000
197	L.VEPDQVAG.L		407.698	2	814.388	814.394	-7	307	124.76	>tr|A0A6P2AZN8|A0A6P2AZN8_9CYAN Glycosyltransferase OS=Spirulina sp. DLM2.Bin59 OX=2480215 GN=EA366_06060 PE=4 SV=1	21.2371	34108000
198	T.VPSY.L		465.236	1	465.236	465.234	4.4	900	220.57	>tr|A0A6P2AYF0|A0A6P2AYF0_9CYAN Uncharacterized protein (Fragment) OS=Spirulina sp. DLM2.Bin59 OX=2480215 GN=EA366_04220 PE=4 SV=1	23.4761	33556000
199	S.LSHPGI.P		312.179	2	623.351	623.351	-0.9	91	162.43	>tr|A0A6P2AUT6|A0A6P2AUT6_9CYAN Non-specific serine/threonine protein kinase (Fragment) OS=Spirulina sp. DLM2.Bin59 OX=2480215 GN=EA366_09360 PE=4 SV=1	32.7191	33286000
200	Y.QPQKADFYLT.V		605.817	2	1210.63	1210.61	13.2	197	103.1	>tr|A0A6P2ART6|A0A6P2ART6_9CYAN Glycosyltransferase family 4 protein OS=Spirulina sp. DLM2.Bin59 OX=2480215 GN=EA366_10630 PE=4 SV=1	33.9432	33215000
201	F.QPAGNLSPQQ.L		520.262	2	1039.52	1039.52	0.8	80	196.54	>tr|A0A6P2ATQ2|A0A6P2ATQ2_9CYAN Serine/threonine protein kinase OS=Spirulina sp. DLM2.Bin59 OX=2480215 GN=EA366_07730 PE=4 SV=1	17.2842	32979000
202	A.QLERTAT.L		409.722	2	818.438	818.437	1.1	157	185.95	>tr|A0A6P2AYN7|A0A6P2AYN7_9CYAN Uma2 family endonuclease OS=Spirulina sp. DLM2.Bin59 OX=2480215 GN=EA366_00955 PE=4 SV=1	16.0693	32877000
203	H.TAAAGQIIFDQG.G		596.312	2	1191.62	1191.6	13.1	15	156.24	>tr|A0A6P2AVP7|A0A6P2AVP7_9CYAN Gamma-glutamyltransferase OS=Spirulina sp. DLM2.Bin59 OX=2480215 GN=ggt PE=4 SV=1	25.5773	32867000
204	I.VIADARLPDM.P		550.79	2	1100.57	1100.58	-4.3	158	166.15	>tr|A0A6P2APF3|A0A6P2APF3_9CYAN PAS domain S-box protein OS=Spirulina sp. DLM2.Bin59 OX=2480215 GN=EA366_11450 PE=3 SV=1	18.9922	32287000
205	I.LDLQR.L		322.69	2	644.372	644.373	-0.1	1088	263.79	>tr|A0A6P2AVV2|A0A6P2AVV2_9CYAN PAS domain S-box protein OS=Spirulina sp. DLM2.Bin59 OX=2480215 GN=EA366_09255 PE=4 SV=1	23.5175	32214000
206	D.PQLQR.I		321.185	2	641.362	641.373	-17.2	84	100.88	>tr|A0A6P2AXT6|A0A6P2AXT6_9CYAN Uncharacterized protein OS=Spirulina sp. DLM2.Bin59 OX=2480215 GN=EA366_06705 PE=4 SV=1	23.5175	32214000
207	I.QQLGFNYRR.K		591.308	2	1181.61	1181.62	-8	379	133.11	>tr|A0A6P2AJY0|A0A6P2AJY0_9CYAN Abortive phage resistance protein (Fragment) OS=Spirulina sp. DLM2.Bin59 OX=2480215 GN=EA366_14185 PE=4 SV=1	16.9755	31153000
208	D.QPAGIL.L		598.357	1	598.357	598.356	1.3	250	238.22	>tr|A0A6P2AM84|A0A6P2AM84_9CYAN Asparagine synthetase B (Fragment) OS=Spirulina sp. DLM2.Bin59 OX=2480215 GN=EA366_12970 PE=3 SV=1	42.7333	31092000
209	E.QLIQFP.K		373.216	2	745.424	745.424	-0.5	239	154.27	>tr|A0A6P2B061|A0A6P2B061_9CYAN Helicase (Fragment) OS=Spirulina sp. DLM2.Bin59 OX=2480215 GN=EA366_05180 PE=4 SV=1	52.8617	30819000
210	Q.VVDILR.H		357.729	2	714.451	714.451	0	404	184.36	>tr|A0A6P2AY07|A0A6P2AY07_9CYAN DNA topoisomerase (ATP-hydrolyzing) (Fragment) OS=Spirulina sp. DLM2.Bin59 OX=2480215 GN=EA366_04145 PE=4 SV=1	32.5113	30452000
211	L.AVNSFFQ.A		812.379	1	812.379	812.394	-18	839	161.3	>tr|A0A6P2ANY1|A0A6P2ANY1_9CYAN DEAD/DEAH box helicase (Fragment) OS=Spirulina sp. DLM2.Bin59 OX=2480215 GN=EA366_12030 PE=4 SV=1	30.8902	30396000
212	I.FQELR.G		346.69	2	692.372	692.373	-0.7	565	218.21	>tr|A0A6P2AUR1|A0A6P2AUR1_9CYAN DNA mismatch repair protein MutS OS=Spirulina sp. DLM2.Bin59 OX=2480215 GN=mutS PE=3 SV=1	20.6444	29793000
213	E.TFLAYR.F		385.715	2	770.423	770.42	4.7	292	104.78	>tr|A0A6P2ASS3|A0A6P2ASS3_9CYAN Sugar transferase OS=Spirulina sp. DLM2.Bin59 OX=2480215 GN=EA366_09435 PE=4 SV=1	22.5884	29777000
214	G.VAHVILI.Y		382.755	2	764.503	764.503	0.3	83	111.51	>tr|A0A6P2ASC5|A0A6P2ASC5_9CYAN Sodium:proline symporter (Fragment) OS=Spirulina sp. DLM2.Bin59 OX=2480215 GN=EA366_09890 PE=3 SV=1	43.5251	29680000
215	R.TLDLPH.L		348.19	2	695.372	695.372	-0.8	105	103.42	>tr|A0A6P2ALG7|A0A6P2ALG7_9CYAN 2-amino-4-hydroxy-6-hydroxymethyldihydropteridine pyrophosphokinase OS=Spirulina sp. DLM2.Bin59 OX=2480215 GN=folK PE=4 SV=1	30.7267	29421000
216	A.IASSHRFSL.R		509.282	2	1017.56	1017.55	9.5	368	108.3	>tr|A0A6P2AWF3|A0A6P2AWF3_9CYAN Mechanosensitive ion channel family protein OS=Spirulina sp. DLM2.Bin59 OX=2480215 GN=EA366_03630 PE=3 SV=1	31.9149	29223000
217	V.LHSTR.R		307.169	2	613.33	613.342	-19.2	111	128.19	>tr|A0A6P2AXS3|A0A6P2AXS3_9CYAN Crp/Fnr family transcriptional regulator OS=Spirulina sp. DLM2.Bin59 OX=2480215 GN=EA366_01385 PE=4 SV=1	20.2963	29179000
218	H.ILDPR.I		307.187	2	613.366	613.367	-0.8	251	117.89	>tr|A0A6P2AWA4|A0A6P2AWA4_9CYAN Serine/threonine-protein kinase PknK (Fragment) OS=Spirulina sp. DLM2.Bin59 OX=2480215 GN=EA366_04690 PE=4 SV=1	20.2963	29179000
219	N.TVIQYQ.G		751.399	1	751.399	751.399	0	33	141.14	>tr|A0A6P2AVY3|A0A6P2AVY3_9CYAN CHAT domain-containing protein OS=Spirulina sp. DLM2.Bin59 OX=2480215 GN=EA366_04540 PE=4 SV=1	34.7775	29021000
220	G.VAF.G		336.192	1	336.192	336.192	-0.4	180	104.77	>tr|A0A6P2AZJ7|A0A6P2AZJ7_9CYAN Phosphoenolpyruvate synthase OS=Spirulina sp. DLM2.Bin59 OX=2480215 GN=EA366_06245 PE=4 SV=1	32.9906	28161000
221	T.QQQGQ.L		588.282	1	588.282	588.274	14	142	160.67	>tr|A0A6P2ANX9|A0A6P2ANX9_9CYAN Uncharacterized protein (Fragment) OS=Spirulina sp. DLM2.Bin59 OX=2480215 GN=EA366_13750 PE=4 SV=1	27.4448	27885000
222	F.ELQTPWNRL.T		1156.61	1	1156.61	1156.61	2.5	350	128.73	>tr|A0A6P2AYK1|A0A6P2AYK1_9CYAN UvrABC system protein A OS=Spirulina sp. DLM2.Bin59 OX=2480215 GN=uvrA PE=3 SV=1	40.7516	27464000
223	E.TLSHYR.G		388.702	2	776.397	776.405	-10	171	140.19	>tr|A0A6P2AYT3|A0A6P2AYT3_9CYAN Glutathione S-transferase family protein OS=Spirulina sp. DLM2.Bin59 OX=2480215 GN=EA366_00345 PE=3 SV=1	16.8817	27456000
224	G.TLR.N		389.265	1	389.265	389.251	35.9	549	112.36	>tr|A0A6P2AZJ7|A0A6P2AZJ7_9CYAN Phosphoenolpyruvate synthase OS=Spirulina sp. DLM2.Bin59 OX=2480215 GN=EA366_06245 PE=4 SV=1	16.8817	27456000
225	Q.RLTPQPH.P		424.74	2	848.474	848.474	-0.2	79	208.34	>tr|A0A6P2AM86|A0A6P2AM86_9CYAN YlxR family protein OS=Spirulina sp. DLM2.Bin59 OX=2480215 GN=EA366_15790 PE=4 SV=1	14.2913	27363000
226	R.ADYNRHH.F		456.716	2	912.424	912.407	18.5	59	168.06	>tr|A0A6P2ARB8|A0A6P2ARB8_9CYAN Magnesium-protoporphyrin IX monomethyl ester [oxidative] cyclase OS=Spirulina sp. DLM2.Bin59 OX=2480215 GN=acsF PE=3 SV=1	19.9657	27334000
227	E.LGDRHH.L		367.682	2	734.357	734.369	-16.7	63	174.95	>tr|A0A6P2AHZ5|A0A6P2AHZ5_9CYAN Dihydrolipoyl dehydrogenase OS=Spirulina sp. DLM2.Bin59 OX=2480215 GN=lpdA PE=3 SV=1	14.5802	27286000
228	W.TLPGQANQ.G		828.422	1	828.422	828.421	1.6	482	141.79	>tr|A0A6P2AS17|A0A6P2AS17_9CYAN Uncharacterized protein OS=Spirulina sp. DLM2.Bin59 OX=2480215 GN=EA366_09960 PE=4 SV=1	44.8736	27127000
229	A.TVMA.E		421.209	1	421.209	421.212	-6.8	251	134.35	>tr|A0A6P2ARZ2|A0A6P2ARZ2_9CYAN Uncharacterized protein OS=Spirulina sp. DLM2.Bin59 OX=2480215 GN=EA366_11520 PE=4 SV=1	26.7228	27110000
230	Q.PLTPGTVSR.G		464.268	2	927.529	927.526	3	228	220.72	>tr|A0A6P2ATX1|A0A6P2ATX1_9CYAN Bifunctional aldolase/short-chain dehydrogenase OS=Spirulina sp. DLM2.Bin59 OX=2480215 GN=EA366_09755 PE=4 SV=1	21.9093	27096000
231	P.SVPTGLFDKS.E		525.785	2	1050.56	1050.55	14.9	194	126.49	>tr|A0A6P2AWQ2|A0A6P2AWQ2_9CYAN Phycobilisome rod-core linker polypeptide CpcG OS=Spirulina sp. DLM2.Bin59 OX=2480215 GN=EA366_09565 PE=3 SV=1	36.5925	27077000
232	K.HVIC[+57.021]EYPLT.F	C[+57]	566.28	2	1131.55	1131.55	2.7	93	181.96	>tr|A0A6P2AWI0|A0A6P2AWI0_9CYAN Gfo/Idh/MocA family oxidoreductase OS=Spirulina sp. DLM2.Bin59 OX=2480215 GN=EA366_04610 PE=4 SV=1	14.8137	26972000
233	E.QQRSER.V		402.212	2	803.417	803.412	5.8	660	134.05	>tr|A0A6P2AX43|A0A6P2AX43_9CYAN PAS domain S-box protein OS=Spirulina sp. DLM2.Bin59 OX=2480215 GN=EA366_02485 PE=4 SV=1	20.3182	26916000
234	L.QPGQGC[+57.021]ETVFVN.S	C[+57]	668.299	2	1335.59	1335.6	-6.7	84	104.84	>tr|A0A6P2AV66|A0A6P2AV66_9CYAN Folate-binding protein OS=Spirulina sp. DLM2.Bin59 OX=2480215 GN=EA366_07280 PE=4 SV=1	14.3931	26434000
235	Y.IPQGLF.S		674.387	1	674.387	674.387	0.3	558	203.74	>tr|A0A6P2AKL0|A0A6P2AKL0_9CYAN Efflux RND transporter permease subunit OS=Spirulina sp. DLM2.Bin59 OX=2480215 GN=EA366_14490 PE=4 SV=1	50.1364	26363000
236	G.SVDTFQK.S		412.712	2	824.417	824.415	2.9	180	196.17	>tr|A0A6P2AXQ6|A0A6P2AXQ6_9CYAN Uncharacterized protein (Fragment) OS=Spirulina sp. DLM2.Bin59 OX=2480215 GN=EA366_03445 PE=4 SV=1	20.5313	26332000
237	N.VPGALVQP.L		780.459	1	780.459	780.461	-2.7	206	129.2	>tr|A0A6P2AST5|A0A6P2AST5_9CYAN Prephenate dehydratase OS=Spirulina sp. DLM2.Bin59 OX=2480215 GN=pheA PE=4 SV=1	38.5201	26186000
238	R.QLQQQPP.L		419.725	2	838.443	838.442	1.6	188	154.16	>tr|A0A6P2AYX2|A0A6P2AYX2_9CYAN Uncharacterized protein OS=Spirulina sp. DLM2.Bin59 OX=2480215 GN=EA366_03325 PE=4 SV=1	17.6202	26025000
239	V.VIAQDNRDSI.L		565.796	2	1130.58	1130.58	4	109	154.32	>tr|A0A6P2AJ54|A0A6P2AJ54_9CYAN VCBS repeat-containing protein (Fragment) OS=Spirulina sp. DLM2.Bin59 OX=2480215 GN=EA366_14465 PE=4 SV=1	18.509	25950000
240	T.HESLR.Q		321.171	2	641.335	641.337	-2.8	140	352.4	>tr|A0A6P2AUU2|A0A6P2AUU2_9CYAN PAS domain S-box protein (Fragment) OS=Spirulina sp. DLM2.Bin59 OX=2480215 GN=EA366_06535 PE=4 SV=1	9.8451	25864000
241	L.DDWLK.H		676.332	1	676.332	676.33	3.2	33	251.29	>tr|A0A6P2AVK5|A0A6P2AVK5_9CYAN N-acetyltransferase OS=Spirulina sp. DLM2.Bin59 OX=2480215 GN=EA366_05185 PE=4 SV=1	33.636	25436000
242	A.LPVLHP.V		675.419	1	675.419	675.419	0.8	410	110.84	>tr|A0A6P2AIY0|A0A6P2AIY0_9CYAN 4Fe-4S dicluster domain-containing protein (Fragment) OS=Spirulina sp. DLM2.Bin59 OX=2480215 GN=EA366_16180 PE=4 SV=1	34.1457	25436000
243	A.EAAGLDN.L		689.313	1	689.313	689.31	3.9	330	109.85	>tr|A0A6P2B0N9|A0A6P2B0N9_9CYAN Zeta-carotene desaturase OS=Spirulina sp. DLM2.Bin59 OX=2480215 GN=zds PE=3 SV=1	36.1003	25319000
244	G.SGLY.Q		439.219	1	439.219	439.219	0.5	12	150.22	>tr|A0A6P2AWG1|A0A6P2AWG1_9CYAN S-methyl-5'-thioadenosine phosphorylase OS=Spirulina sp. DLM2.Bin59 OX=2480215 GN=mtnP PE=3 SV=1	24.7801	25129000
245	F.GSIY.E		439.219	1	439.219	439.219	0.5	478	150.22	>tr|A0A6P2AZ82|A0A6P2AZ82_9CYAN Magnesium chelatase OS=Spirulina sp. DLM2.Bin59 OX=2480215 GN=EA366_04130 PE=3 SV=1	24.7801	25129000
246	F.AHGTLF.A		323.171	2	645.335	645.336	-0.1	124	260.33	>tr|A0A6P2ATL3|A0A6P2ATL3_9CYAN Filamentous hemagglutinin N-terminal domain-containing protein (Fragment) OS=Spirulina sp. DLM2.Bin59 OX=2480215 GN=EA366_08710 PE=4 SV=1	22.4167	24895000
247	E.TYPHIP.V		364.186	2	727.365	727.377	-17.4	72	171.98	>tr|A0A6P2AXW7|A0A6P2AXW7_9CYAN Fructose-1,6-bisphosphate aldolase OS=Spirulina sp. DLM2.Bin59 OX=2480215 GN=fba PE=3 SV=1	14.0687	24684000
248	A.AFTAVLTK.N		425.756	2	850.505	850.503	2.4	676	168.73	>tr|A0A6P2AM50|A0A6P2AM50_9CYAN HAMP domain-containing protein OS=Spirulina sp. DLM2.Bin59 OX=2480215 GN=EA366_12590 PE=4 SV=1	28.0378	24631000
249	L.GFGITSISM.V		912.453	1	912.453	912.449	3.9	336	123.04	>tr|A0A6P2ALP3|A0A6P2ALP3_9CYAN Coproporphyrinogen-III oxidase OS=Spirulina sp. DLM2.Bin59 OX=2480215 GN=hemN PE=3 SV=1	39.3081	24500000
250	T.VATGALLR.M		400.753	2	800.499	800.499	-0.4	22	164.06	>tr|A0A6P2AUJ6|A0A6P2AUJ6_9CYAN Uncharacterized protein OS=Spirulina sp. DLM2.Bin59 OX=2480215 GN=EA366_09100 PE=4 SV=1	14.6623	24193000
251	S.PVYLDF.S		377.188	2	753.369	753.382	-17.5	191	104.44	>tr|A0A6P2AM50|A0A6P2AM50_9CYAN HAMP domain-containing protein OS=Spirulina sp. DLM2.Bin59 OX=2480215 GN=EA366_12590 PE=4 SV=1	22.7824	24105000
252	T.KFP.H		391.234	1	391.234	391.234	-0.7	397	196.94	>tr|A0A6P2AXM7|A0A6P2AXM7_9CYAN Alpha-mannosidase (Fragment) OS=Spirulina sp. DLM2.Bin59 OX=2480215 GN=EA366_01625 PE=3 SV=1	19.8803	23941000
253	I.ITPNLAAHFNK.Q		409.22	3	1225.65	1225.67	-19.2	363	104.1	>tr|A0A6P2B145|A0A6P2B145_9CYAN CHAT domain-containing protein OS=Spirulina sp. DLM2.Bin59 OX=2480215 GN=EA366_03470 PE=4 SV=1	13.5293	23843000
254	Q.QQTALT.Q		661.356	1	661.356	661.351	6.3	414	119.59	>tr|A0A6P2AXD8|A0A6P2AXD8_9CYAN Chromosome partition protein Smc OS=Spirulina sp. DLM2.Bin59 OX=2480215 GN=smc PE=3 SV=1	34.364	23816000
255	G.LSLAHQT.L		385.213	2	769.419	769.42	-1.2	703	221.13	>tr|A0A6P2AUN5|A0A6P2AUN5_9CYAN CHASE2 domain-containing protein OS=Spirulina sp. DLM2.Bin59 OX=2480215 GN=EA366_09530 PE=4 SV=1	20.0095	23587000
256	I.IAGNVAFY.G		854.436	1	854.436	854.441	-5.3	1350	129.96	>tr|A0A6P2B1K3|A0A6P2B1K3_9CYAN Glutamate synthase large subunit OS=Spirulina sp. DLM2.Bin59 OX=2480215 GN=EA366_02595 PE=3 SV=1	24.6525	23562000
257	P.QPGILF.R		674.388	1	674.388	674.387	0.8	15	239.78	>tr|A0A6P2AW59|A0A6P2AW59_9CYAN Adenine phosphoribosyltransferase OS=Spirulina sp. DLM2.Bin59 OX=2480215 GN=apt PE=3 SV=1	50.7176	23545000
258	T.HDYQVK.L		395.198	2	789.388	789.389	-0.9	316	148.32	>tr|A0A6P2AZQ5|A0A6P2AZQ5_9CYAN Uncharacterized protein OS=Spirulina sp. DLM2.Bin59 OX=2480215 GN=EA366_01815 PE=4 SV=1	14.8285	23179000
259	T.QLM[+15.995]QLF.Q	M[+16]	795.407	1	795.407	795.407	0.2	642	112.27	>tr|A0A6P2AXN5|A0A6P2AXN5_9CYAN GAF domain-containing protein OS=Spirulina sp. DLM2.Bin59 OX=2480215 GN=EA366_01545 PE=3 SV=1	44.3057	23179000
260	L.PVFIYPL.G		424.754	2	848.501	848.492	10.8	10	138.22	>tr|A0A6P2AU55|A0A6P2AU55_9CYAN YdcF family protein OS=Spirulina sp. DLM2.Bin59 OX=2480215 GN=EA366_07095 PE=4 SV=1	35.1073	22815000
261	A.LQPWGFPDSVK.P		637.332	2	1273.66	1273.66	-0.3	241	123.81	>tr|A0A6P2B1B4|A0A6P2B1B4_9CYAN Primosomal protein N' (Replication factor Y)-superfamily II helicase OS=Spirulina sp. DLM2.Bin59 OX=2480215 GN=EA366_03095 PE=4 SV=1	40.2159	22762000
262	E.LFPQQP.I		365.201	2	729.395	729.393	2.2	108	143.37	>tr|A0A6P2AR22|A0A6P2AR22_9CYAN Pyrroline-5-carboxylate reductase OS=Spirulina sp. DLM2.Bin59 OX=2480215 GN=proC PE=3 SV=1	32.803	22392000
263	T.SC[+57.021]LIR.K	C[+57]	324.678	2	648.35	648.35	-0.2	96	271.22	>tr|A0A6P2AV88|A0A6P2AV88_9CYAN Alpha-D-glucose phosphate-specific phosphoglucomutase OS=Spirulina sp. DLM2.Bin59 OX=2480215 GN=EA366_06855 PE=3 SV=1	18.8836	22217000
264	I.PQQPFS.R		703.344	1	703.344	703.341	4.5	137	100.98	>tr|A0A6P2AVJ2|A0A6P2AVJ2_9CYAN PAS domain S-box protein OS=Spirulina sp. DLM2.Bin59 OX=2480215 GN=EA366_04855 PE=4 SV=1	55.5361	22214000
265	P.PVLTTGM[+15.995]LFG.N	M[+16]	526.282	2	1051.56	1051.55	6.3	43	108.18	>tr|A0A6P2AZI6|A0A6P2AZI6_9CYAN Probable membrane transporter protein OS=Spirulina sp. DLM2.Bin59 OX=2480215 GN=EA366_01465 PE=3 SV=1	27.0175	22125000
266	M.TFGGED.L		313.121	2	625.236	625.246	-17.4	43	197.96	>tr|A0A6P2AYQ0|A0A6P2AYQ0_9CYAN Type II toxin-antitoxin system death-on-curing family toxin OS=Spirulina sp. DLM2.Bin59 OX=2480215 GN=EA366_02905 PE=4 SV=1	19.7862	21798000
267	D.YAFDQ.P		643.274	1	643.274	643.272	2.1	411	104.41	>tr|A0A6P2B045|A0A6P2B045_9CYAN Peptidase S8 and S53 subtilisin kexin sedolisin OS=Spirulina sp. DLM2.Bin59 OX=2480215 GN=EA366_01150 PE=4 SV=1	26.7661	21560000
268	G.QQTAVF.D		693.361	1	693.361	693.357	5.7	297	155.61	>tr|A0A6P2AZT7|A0A6P2AZT7_9CYAN Glycosyltransferase OS=Spirulina sp. DLM2.Bin59 OX=2480215 GN=EA366_01680 PE=4 SV=1	30.4889	21470000
269	F.PSLVVF.C		661.393	1	661.393	661.392	1.1	71	231.83	>tr|A0A6P2AYU5|A0A6P2AYU5_9CYAN Uncharacterized protein OS=Spirulina sp. DLM2.Bin59 OX=2480215 GN=EA366_07310 PE=4 SV=1	54.9737	21365000
270	Y.SIERD.G		619.314	1	619.314	619.305	15.3	71	113.4	>tr|A0A6P2AV92|A0A6P2AV92_9CYAN Non-specific serine/threonine protein kinase OS=Spirulina sp. DLM2.Bin59 OX=2480215 GN=EA366_09750 PE=4 SV=1	31.4808	21335000
271	L.YLPYP.R		652.335	1	652.335	652.334	1.6	118	129.17	>tr|A0A6P2AW40|A0A6P2AW40_9CYAN Pilus assembly protein PilM OS=Spirulina sp. DLM2.Bin59 OX=2480215 GN=EA366_10020 PE=4 SV=1	37.7844	21268000
272	Q.SYLFY.I		692.33	1	692.33	692.329	1.1	116	132.62	>tr|A0A6P2AWD0|A0A6P2AWD0_9CYAN Uncharacterized protein OS=Spirulina sp. DLM2.Bin59 OX=2480215 GN=EA366_07665 PE=4 SV=1	32.6127	21236000
273	F.TFPRQ.R		324.677	2	648.346	648.346	-0.4	1015	216.82	>tr|A0A6P2AMU6|A0A6P2AMU6_9CYAN Methionine synthase OS=Spirulina sp. DLM2.Bin59 OX=2480215 GN=metH PE=3 SV=1	17.7165	20838000
274	A.QLTGANLSHA.A		506.271	2	1011.53	1011.52	12.9	288	232.63	>tr|A0A6P2AU82|A0A6P2AU82_9CYAN Low-complexity protein OS=Spirulina sp. DLM2.Bin59 OX=2480215 GN=EA366_08460 PE=4 SV=1	13.7439	20835000
275	N.GLETFYFSPQ.G		594.79	2	1188.57	1188.56	12.8	92	165.56	>tr|A0A6P2AVZ1|A0A6P2AVZ1_9CYAN N-acetylmuramoyl-L-alanine amidase (Fragment) OS=Spirulina sp. DLM2.Bin59 OX=2480215 GN=EA366_10140 PE=4 SV=1	38.3996	20641000
276	T.KDTERFH.N		466.733	2	932.458	932.458	-0.4	615	135.88	>tr|A0A6P2AQ88|A0A6P2AQ88_9CYAN TIGR02921 family PEP-CTERM protein OS=Spirulina sp. DLM2.Bin59 OX=2480215 GN=EA366_10935 PE=4 SV=1	11.6415	20583000
277	T.QPQFEAVLPL.P		571.311	2	1141.61	1141.63	-9.9	227	111.88	>tr|A0A6P2AUT3|A0A6P2AUT3_9CYAN Bifunctional NAD(P)H-hydrate repair enzyme OS=Spirulina sp. DLM2.Bin59 OX=2480215 GN=nnrD PE=3 SV=1	18.4167	20411000
278	W.SQGAPAGRNPW.R		570.788	2	1140.57	1140.55	11.7	494	107.52	>tr|A0A6P2AMG7|A0A6P2AMG7_9CYAN Cytochrome c oxidase subunit 1 OS=Spirulina sp. DLM2.Bin59 OX=2480215 GN=ctaD PE=3 SV=1	18.4167	20411000
279	R.QPLQIPQ.T		412.238	2	823.469	823.467	2.2	37	243.06	>tr|A0A6P2AJU6|A0A6P2AJU6_9CYAN dTDP-4-dehydrorhamnose reductase OS=Spirulina sp. DLM2.Bin59 OX=2480215 GN=EA366_15530 PE=3 SV=1	32.8431	20364000
280	P.QPQQGEV.I		785.379	1	785.379	785.379	0.5	14	140.07	>tr|A0A6P2AS36|A0A6P2AS36_9CYAN DUF3318 domain-containing protein OS=Spirulina sp. DLM2.Bin59 OX=2480215 GN=EA366_09595 PE=4 SV=1	37.4668	20147000
281	M.QPQPMNELIQQQL.A		783.903	2	1566.8	1566.79	2.8	410	101.32	>tr|A0A6P2AYR4|A0A6P2AYR4_9CYAN ABC transporter substrate-binding protein OS=Spirulina sp. DLM2.Bin59 OX=2480215 GN=EA366_04995 PE=4 SV=1	37.4668	20147000
282	S.PQGITVTS.L		802.446	1	802.446	802.431	18.7	604	119.72	>tr|A0A6P2AVY3|A0A6P2AVY3_9CYAN CHAT domain-containing protein OS=Spirulina sp. DLM2.Bin59 OX=2480215 GN=EA366_04540 PE=4 SV=1	52.8131	20041000
283	R.IPQRLGYSP.Q		515.789	2	1030.57	1030.57	2.6	96	138.61	>tr|A0A6P2AUU7|A0A6P2AUU7_9CYAN Glycosyltransferase family 1 protein OS=Spirulina sp. DLM2.Bin59 OX=2480215 GN=EA366_07670 PE=4 SV=1	39.5871	19932000
284	Q.SSLLGSGF.D		384.201	2	767.394	767.393	1.5	770	166.76	>tr|A0A6P2AK88|A0A6P2AK88_9CYAN Phosphoenolpyruvate carboxylase OS=Spirulina sp. DLM2.Bin59 OX=2480215 GN=ppc PE=3 SV=1	29.3967	19770000
285	L.QEPLQYFW.I		555.772	2	1110.54	1110.53	9.8	258	112.95	>tr|A0A6P2ALX6|A0A6P2ALX6_9CYAN SGNH/GDSL hydrolase family protein OS=Spirulina sp. DLM2.Bin59 OX=2480215 GN=EA366_12915 PE=4 SV=1	20.9772	19748000
286	Q.AGQQQGQRS.S		959.459	1	959.459	959.465	-6.2	31	105.27	>tr|A0A6P2AJP4|A0A6P2AJP4_9CYAN Zinc ribbon domain-containing protein OS=Spirulina sp. DLM2.Bin59 OX=2480215 GN=EA366_15085 PE=4 SV=1	27.2025	19219000
287	A.KDQNQ.R		632.304	1	632.304	632.3	6.9	192	130.92	>tr|A0A6P2AV17|A0A6P2AV17_9CYAN ABC transporter ATP-binding protein (Fragment) OS=Spirulina sp. DLM2.Bin59 OX=2480215 GN=EA366_08625 PE=4 SV=1	18.9894	19017000
288	G.LGALGLY.F		706.413	1	706.413	706.413	-0.2	69	209.69	>tr|A0A6P2AK47|A0A6P2AK47_9CYAN Peptide chain release factor 1 OS=Spirulina sp. DLM2.Bin59 OX=2480215 GN=EA366_15285 PE=4 SV=1	50.2145	18975000
289	L.SGFP.D		407.193	1	407.193	407.192	2.1	583	122.35	>tr|A0A6P2AV11|A0A6P2AV11_9CYAN DUF1565 domain-containing protein OS=Spirulina sp. DLM2.Bin59 OX=2480215 GN=EA366_06250 PE=4 SV=1	25.3381	18964000
290	A.AATFPQHT.L		436.719	2	872.43	872.426	4.5	27	147.25	>tr|A0A6P2AZL2|A0A6P2AZL2_9CYAN Uncharacterized protein (Fragment) OS=Spirulina sp. DLM2.Bin59 OX=2480215 GN=EA366_01405 PE=3 SV=1	27.7258	18868000
291	T.LFR.Y		435.273	1	435.273	435.271	3.3	41	123.33	>tr|A0A6P2B207|A0A6P2B207_9CYAN O-antigen ligase family protein OS=Spirulina sp. DLM2.Bin59 OX=2480215 GN=EA366_01800 PE=4 SV=1	27.7258	18868000
292	S.QTIQKA.V		688.386	1	688.386	688.399	-18.3	309	161.16	>tr|A0A6P2B307|A0A6P2B307_9CYAN Histidine kinase (Fragment) OS=Spirulina sp. DLM2.Bin59 OX=2480215 GN=EA366_00285 PE=4 SV=1	17.3252	18794000
293	Y.LLY.A		408.25	1	408.25	408.249	1.7	33	156.75	>tr|A0A6P2AX54|A0A6P2AX54_9CYAN DUF3854 domain-containing protein OS=Spirulina sp. DLM2.Bin59 OX=2480215 GN=EA366_04245 PE=4 SV=1	31.192	18747000
294	A.FYER.M		307.65	2	614.293	614.293	-0.8	130	144.82	>tr|A0A6P2ATB0|A0A6P2ATB0_9CYAN GNAT family N-acetyltransferase OS=Spirulina sp. DLM2.Bin59 OX=2480215 GN=EA366_09365 PE=4 SV=1	19.4778	18728000
295	V.PGALVQPLQ.V		922.538	1	922.538	922.536	2.1	207	170.01	>tr|A0A6P2AST5|A0A6P2AST5_9CYAN Prephenate dehydratase OS=Spirulina sp. DLM2.Bin59 OX=2480215 GN=pheA PE=4 SV=1	42.5399	18691000
296	V.DFSKMEPQ.P		981.446	1	981.446	981.435	11.9	218	163.64	>tr|A0A6P2AK96|A0A6P2AK96_9CYAN tRNA uridine 5-carboxymethylaminomethyl modification enzyme MnmG OS=Spirulina sp. DLM2.Bin59 OX=2480215 GN=mnmG PE=3 SV=1	31.9304	18533000
297	Q.QQIPITL.L		812.487	1	812.487	812.488	-0.5	436	158.62	>tr|A0A6P2AXS5|A0A6P2AXS5_9CYAN Glycosyltransferase family 1 protein OS=Spirulina sp. DLM2.Bin59 OX=2480215 GN=EA366_04595 PE=4 SV=1	44.7967	18523000
298	F.TVAYLAQ.D		383.212	2	765.417	765.414	3.9	117	107.21	>tr|A0A6P2AW72|A0A6P2AW72_9CYAN 2-carboxy-1,4-naphthoquinone phytyltransferase OS=Spirulina sp. DLM2.Bin59 OX=2480215 GN=menA PE=3 SV=1	20.0618	18310000
299	G.VALHKGEVQ.G		490.782	2	980.556	980.552	4	72	199.32	>tr|A0A6P2B1W9|A0A6P2B1W9_9CYAN Aromatic ring-hydroxylating dioxygenase subunit alpha OS=Spirulina sp. DLM2.Bin59 OX=2480215 GN=EA366_02015 PE=4 SV=1	18.6389	18275000
300	T.PIPFNT.G		688.366	1	688.366	688.366	0.1	307	172.9	>tr|A0A6P2APR0|A0A6P2APR0_9CYAN SagB/ThcOx family dehydrogenase OS=Spirulina sp. DLM2.Bin59 OX=2480215 GN=EA366_12445 PE=4 SV=1	42.7358	18231000
301	F.QPFQPQ.Q		372.687	2	744.367	744.367	-0.8	57	158.96	>tr|A0A6P2APA7|A0A6P2APA7_9CYAN Glycosyltransferase OS=Spirulina sp. DLM2.Bin59 OX=2480215 GN=EA366_11530 PE=4 SV=1	27.1541	18225000
302	I.TERKTH.E		386.215	2	771.422	771.411	15.1	244	157.44	>tr|A0A6P2AZ50|A0A6P2AZ50_9CYAN PAS domain S-box protein OS=Spirulina sp. DLM2.Bin59 OX=2480215 GN=EA366_02170 PE=4 SV=1	21.8577	18068000
303	A.QPNPK.A		583.32	1	583.32	583.32	-0.2	39	170.95	>tr|A0A6P2AU19|A0A6P2AU19_9CYAN ATP-binding protein (Fragment) OS=Spirulina sp. DLM2.Bin59 OX=2480215 GN=EA366_09585 PE=4 SV=1	17.3159	17961000
304	F.TFPSPPP.P		371.698	2	742.389	742.377	16.3	44	106.36	>tr|A0A6P2ANI6|A0A6P2ANI6_9CYAN BON domain-containing protein OS=Spirulina sp. DLM2.Bin59 OX=2480215 GN=EA366_12105 PE=4 SV=1	27.9664	17892000
305	Q.IPQDHGL.D		779.405	1	779.405	779.405	0.2	1229	111.63	>tr|A0A6P2B1K3|A0A6P2B1K3_9CYAN Glutamate synthase large subunit OS=Spirulina sp. DLM2.Bin59 OX=2480215 GN=EA366_02595 PE=3 SV=1	42.554	17789000
306	S.LPMISQ.D		688.367	1	688.367	688.37	-4.6	738	219.18	>tr|A0A6P2AVJ2|A0A6P2AVJ2_9CYAN PAS domain S-box protein OS=Spirulina sp. DLM2.Bin59 OX=2480215 GN=EA366_04855 PE=4 SV=1	42.2318	17764000
307	I.NVPI.F		442.267	1	442.267	442.266	1.7	570	121.12	>tr|A0A6P2AYR9|A0A6P2AYR9_9CYAN GAF domain-containing protein OS=Spirulina sp. DLM2.Bin59 OX=2480215 GN=EA366_02780 PE=4 SV=1	29.1872	17741000
308	K.FERY.K		614.294	1	614.294	614.293	0.5	70	115.55	>tr|A0A6P2AXX5|A0A6P2AXX5_9CYAN Uncharacterized protein OS=Spirulina sp. DLM2.Bin59 OX=2480215 GN=EA366_02005 PE=4 SV=1	19.3663	17716000
309	G.GAPQPGFRDYA.A		589.788	2	1178.57	1178.56	7.7	457	125.05	>tr|A0A6P2AV24|A0A6P2AV24_9CYAN Signal recognition particle protein OS=Spirulina sp. DLM2.Bin59 OX=2480215 GN=ffh PE=3 SV=1	40.8222	17586000
310	E.QPQSLFW.D		453.235	2	905.462	905.452	11.9	124	115.89	>tr|A0A6P2AI44|A0A6P2AI44_9CYAN Rpn family recombination-promoting nuclease/putative transposase OS=Spirulina sp. DLM2.Bin59 OX=2480215 GN=EA366_15240 PE=4 SV=1	26.8504	17479000
311	T.NC[+57.021]LM[+15.995]PPHD.T	C[+57], M[+16]	500.214	2	999.42	999.402	17.8	304	102.91	>tr|A0A6P2AYH0|A0A6P2AYH0_9CYAN Hydroxylamine reductase OS=Spirulina sp. DLM2.Bin59 OX=2480215 GN=hcp PE=3 SV=1	22.4195	17013000
312	R.QQQEEHIRTI.I		641.336	2	1281.67	1281.65	8.6	155	108.86	>tr|A0A6P2AX64|A0A6P2AX64_9CYAN PAS domain S-box protein OS=Spirulina sp. DLM2.Bin59 OX=2480215 GN=EA366_01840 PE=4 SV=1	14.8903	16932000
313	S.QQPLM.G		616.31	1	616.31	616.312	-4.1	13	104.65	>tr|A0A6P2AIU0|A0A6P2AIU0_9CYAN Circadian clock protein kinase KaiC OS=Spirulina sp. DLM2.Bin59 OX=2480215 GN=kaiC PE=3 SV=1	47.4723	16910000
314	P.QQPMI.L		616.31	1	616.31	616.312	-4.1	8	104.65	>tr|A0A6P2ANZ2|A0A6P2ANZ2_9CYAN PEP-CTERM sorting domain-containing protein OS=Spirulina sp. DLM2.Bin59 OX=2480215 GN=EA366_12845 PE=4 SV=1	47.4723	16910000
315	A.IASTVVYAPP.Q		509.284	2	1017.56	1017.56	-0.2	35	234.39	>tr|A0A6P2AXU2|A0A6P2AXU2_9CYAN CocE/NonD family hydrolase (Fragment) OS=Spirulina sp. DLM2.Bin59 OX=2480215 GN=EA366_02145 PE=4 SV=1	17.4317	16829000
316	S.EQILH.R		639.345	1	639.345	639.346	-1.2	104	212.97	>tr|A0A6P2ARC6|A0A6P2ARC6_9CYAN Response regulator (Fragment) OS=Spirulina sp. DLM2.Bin59 OX=2480215 GN=EA366_10995 PE=4 SV=1	19.0618	16750000
317	P.SQMHRRLK.I		528.297	2	1055.59	1055.59	-1.8	13	138.47	>tr|A0A6P2AVY0|A0A6P2AVY0_9CYAN Uncharacterized protein OS=Spirulina sp. DLM2.Bin59 OX=2480215 GN=EA366_04100 PE=4 SV=1	22.3092	16719000
318	E.LFQ.T		407.229	1	407.229	407.229	1	122	160.84	>tr|A0A6P2ARZ2|A0A6P2ARZ2_9CYAN Uncharacterized protein OS=Spirulina sp. DLM2.Bin59 OX=2480215 GN=EA366_11520 PE=4 SV=1	22.3817	16701000
319	A.LGKETDH.D		400.202	2	799.396	799.394	1.5	313	121.51	>tr|A0A6P2AZD3|A0A6P2AZD3_9CYAN DUF262 domain-containing protein (Fragment) OS=Spirulina sp. DLM2.Bin59 OX=2480215 GN=EA366_03840 PE=4 SV=1	19.8003	16545000
320	S.VHPHFIRWVD.E		653.35	2	1305.69	1305.69	5.6	367	122.72	>tr|A0A6P2AXH7|A0A6P2AXH7_9CYAN Proline--tRNA ligase OS=Spirulina sp. DLM2.Bin59 OX=2480215 GN=proS PE=3 SV=1	18.5658	16497000
321	E.AGPFWGRHYLF.W		675.831	2	1350.66	1350.67	-13.8	161	100.24	>tr|A0A6P2B0N7|A0A6P2B0N7_9CYAN DUF98 domain-containing protein OS=Spirulina sp. DLM2.Bin59 OX=2480215 GN=EA366_04305 PE=4 SV=1	40.9599	16188000
322	R.QLPHKFTV.W		485.278	2	969.549	969.552	-2.8	62	222.49	>tr|A0A6P2AZL4|A0A6P2AZL4_9CYAN Uncharacterized protein OS=Spirulina sp. DLM2.Bin59 OX=2480215 GN=EA366_02045 PE=4 SV=1	21.3106	16094000
323	E.VINQVPP.T		383.733	2	766.458	766.446	16	23	105.46	>tr|A0A6P2B0R4|A0A6P2B0R4_9CYAN Proton-translocating NAD(P)(+) transhydrogenase OS=Spirulina sp. DLM2.Bin59 OX=2480215 GN=EA366_04175 PE=4 SV=1	22.1309	16042000
324	A.QVLAHLIFG.R		499.295	2	997.582	997.583	-1	134	191.13	>tr|A0A6P2AQN7|A0A6P2AQN7_9CYAN YdcF family protein OS=Spirulina sp. DLM2.Bin59 OX=2480215 GN=EA366_13530 PE=4 SV=1	21.7006	15861000
325	Y.QIEIAKH.G		419.745	2	838.482	838.478	4.8	194	138.65	>tr|A0A6P2AZJ4|A0A6P2AZJ4_9CYAN Response regulator (Fragment) OS=Spirulina sp. DLM2.Bin59 OX=2480215 GN=EA366_02175 PE=4 SV=1	15.5047	15853000
326	F.KDLPHTQ.L		838.441	1	838.441	838.442	-0.5	100	100.31	>tr|A0A6P2AYV2|A0A6P2AYV2_9CYAN Aminotransferase class I/II-fold pyridoxal phosphate-dependent enzyme OS=Spirulina sp. DLM2.Bin59 OX=2480215 GN=EA366_02010 PE=4 SV=1	21.2877	15812000
327	Q.KASPTGGY.F		780.389	1	780.389	780.389	0.7	510	166.35	>tr|A0A6P2ARZ9|A0A6P2ARZ9_9CYAN Penicillin-binding protein 2 OS=Spirulina sp. DLM2.Bin59 OX=2480215 GN=EA366_09710 PE=4 SV=1	35.0126	15802000
328	Y.VSSAGVYQ.K		810.398	1	810.398	810.399	-1.3	87	148.3	>tr|A0A6P2AR66|A0A6P2AR66_9CYAN NAD-dependent epimerase/dehydratase family protein (Fragment) OS=Spirulina sp. DLM2.Bin59 OX=2480215 GN=EA366_10120 PE=4 SV=1	30.3321	15766000
329	Y.YFLRG.W		328.182	2	655.356	655.356	-0.3	332	205.67	>tr|A0A6P2AZT4|A0A6P2AZT4_9CYAN YdcF family protein OS=Spirulina sp. DLM2.Bin59 OX=2480215 GN=EA366_03020 PE=4 SV=1	28.8894	15655000
330	I.TLPQTTDHR.I		534.779	2	1068.55	1068.54	7	131	255.15	>tr|A0A6P2AL79|A0A6P2AL79_9CYAN Heat-inducible transcription repressor HrcA OS=Spirulina sp. DLM2.Bin59 OX=2480215 GN=hrcA PE=3 SV=1	30.3167	15622000
331	L.ALYVAL.G		649.396	1	649.396	649.392	5.9	252	203.32	>tr|A0A6P2AMD5|A0A6P2AMD5_9CYAN Uncharacterized protein (Fragment) OS=Spirulina sp. DLM2.Bin59 OX=2480215 GN=EA366_14575 PE=4 SV=1	50.6497	15591000
332	G.ISPY.E		479.255	1	479.255	479.25	10.4	875	255.93	>tr|A0A6P2AXX2|A0A6P2AXX2_9CYAN P-type Ca(2+) transporter OS=Spirulina sp. DLM2.Bin59 OX=2480215 GN=EA366_03175 PE=4 SV=1	25.1513	15514000
333	G.QFPTNPL.E		408.717	2	816.427	816.425	2.8	197	103.37	>tr|A0A6P2AZ16|A0A6P2AZ16_9CYAN Uncharacterized protein OS=Spirulina sp. DLM2.Bin59 OX=2480215 GN=EA366_04465 PE=4 SV=1	37.5567	15489000
334	L.QYVEIR.G		404.222	2	807.437	807.436	0.9	442	237.72	>tr|A0A6P2AIU0|A0A6P2AIU0_9CYAN Circadian clock protein kinase KaiC OS=Spirulina sp. DLM2.Bin59 OX=2480215 GN=kaiC PE=3 SV=1	24.5621	15356000
335	G.TVRGYVI.N		404.239	2	807.471	807.472	-1.5	86	150.07	>tr|A0A6P2AZK9|A0A6P2AZK9_9CYAN 33 kDa chaperonin OS=Spirulina sp. DLM2.Bin59 OX=2480215 GN=hslO PE=3 SV=1	24.5621	15356000
336	W.QQFANI.D		720.368	1	720.368	720.367	0.1	411	167.2	>tr|A0A6P2AWQ3|A0A6P2AWQ3_9CYAN UDP-glucose 6-dehydrogenase OS=Spirulina sp. DLM2.Bin59 OX=2480215 GN=EA366_07335 PE=3 SV=1	32.0481	15332000
337	L.ELRNI.P		322.689	2	644.371	644.373	-2.1	94	138.57	>tr|A0A6P2AMB7|A0A6P2AMB7_9CYAN Tetratricopeptide repeat protein (Fragment) OS=Spirulina sp. DLM2.Bin59 OX=2480215 GN=EA366_14640 PE=4 SV=1	21.4641	15284000
338	L.IFDRDAAR.G		482.259	2	963.511	963.501	11.1	50	131.12	>tr|A0A6P2AMY4|A0A6P2AMY4_9CYAN Urease subunit beta OS=Spirulina sp. DLM2.Bin59 OX=2480215 GN=ureB PE=3 SV=1	22.7903	15162000
339	G.QLPQLPQ.P		823.466	1	823.466	823.467	-1.3	231	209.82	>tr|A0A6P2AM47|A0A6P2AM47_9CYAN Alpha/beta hydrolase OS=Spirulina sp. DLM2.Bin59 OX=2480215 GN=EA366_13015 PE=4 SV=1	39.3961	15141000
340	Q.TAAASVTF.E		767.395	1	767.395	767.393	1.8	302	101.93	>tr|A0A6P2AQB3|A0A6P2AQB3_9CYAN Tetratricopeptide repeat protein OS=Spirulina sp. DLM2.Bin59 OX=2480215 GN=EA366_12050 PE=4 SV=1	39.9041	15032000
341	S.VHGSLGEH.S		418.206	2	835.405	835.406	-0.7	417	145.53	>tr|A0A6P2AYC2|A0A6P2AYC2_9CYAN D-3-phosphoglycerate dehydrogenase OS=Spirulina sp. DLM2.Bin59 OX=2480215 GN=EA366_01520 PE=3 SV=1	10.5626	14900000
342	R.VALTNAYRH.L		522.781	2	1044.55	1044.56	-3.6	664	136.6	>tr|A0A6P2AWZ2|A0A6P2AWZ2_9CYAN ATP-binding protein OS=Spirulina sp. DLM2.Bin59 OX=2480215 GN=EA366_03660 PE=4 SV=1	25.0323	14840000
343	E.LLPLR.R		306.216	2	611.424	611.424	-0.5	680	216.27	>tr|A0A6P2AZJ7|A0A6P2AZJ7_9CYAN Phosphoenolpyruvate synthase OS=Spirulina sp. DLM2.Bin59 OX=2480215 GN=EA366_06245 PE=4 SV=1	31.9949	14745000
344	A.IDEWHRLKA.A		584.326	2	1167.64	1167.63	15.3	41	104.9	>tr|A0A6P2AJ61|A0A6P2AJ61_9CYAN Antitoxin OS=Spirulina sp. DLM2.Bin59 OX=2480215 GN=EA366_14945 PE=3 SV=1	27.0026	14702000
345	L.TFGGFP.V		313.158	2	625.308	625.298	16.5	898	129.97	>tr|A0A6P2AX43|A0A6P2AX43_9CYAN PAS domain S-box protein OS=Spirulina sp. DLM2.Bin59 OX=2480215 GN=EA366_02485 PE=4 SV=1	20.2475	14686000
346	W.QQFWADQGLDR.T		682.323	2	1363.64	1363.64	0.6	15	132.8	>tr|A0A6P2AV44|A0A6P2AV44_9CYAN Leucine--tRNA ligase OS=Spirulina sp. DLM2.Bin59 OX=2480215 GN=leuS PE=3 SV=1	48.184	14624000
347	L.VYPG.L		435.224	1	435.224	435.224	0.5	500	183.88	>tr|A0A6P2AYP0|A0A6P2AYP0_9CYAN Type III-B CRISPR-associated protein Cas10/Cmr2 OS=Spirulina sp. DLM2.Bin59 OX=2480215 GN=EA366_02935 PE=4 SV=1	17.2678	14542000
348	V.TIPPYRH.R		442.238	2	883.469	883.479	-10.7	458	120.66	>tr|A0A6P2AUW9|A0A6P2AUW9_9CYAN Phenylalanine--tRNA ligase beta subunit OS=Spirulina sp. DLM2.Bin59 OX=2480215 GN=pheT PE=3 SV=1	33.5943	14425000
349	L.QQIADYL.A		850.431	1	850.431	850.431	0.3	76	110.93	>tr|A0A6P2AHC4|A0A6P2AHC4_9CYAN Uncharacterized protein OS=Spirulina sp. DLM2.Bin59 OX=2480215 GN=EA366_15775 PE=4 SV=1	36.5771	14352000
350	D.AIDHNAY.D		402.193	2	803.378	803.368	12	164	107.83	>tr|A0A6P2AW19|A0A6P2AW19_9CYAN Alpha-amylase OS=Spirulina sp. DLM2.Bin59 OX=2480215 GN=EA366_09060 PE=3 SV=1	11.4544	14304000
351	A.EFRC[+57.021]NGGSVSL.W	C[+57]	613.287	2	1225.57	1225.56	2.7	477	110.85	>tr|A0A6P2AW19|A0A6P2AW19_9CYAN Alpha-amylase OS=Spirulina sp. DLM2.Bin59 OX=2480215 GN=EA366_09060 PE=3 SV=1	22.0387	14279000
352	L.FPPSQLYNLYP.F		669.843	2	1338.68	1338.67	4.2	213	201.66	>tr|A0A6P2APF6|A0A6P2APF6_9CYAN Cupin-like domain-containing protein OS=Spirulina sp. DLM2.Bin59 OX=2480215 GN=EA366_12090 PE=4 SV=1	39.0546	14203000
353	K.QLQMHLAQPQ.T		597.304	2	1193.6	1193.61	-7.4	40	147.58	>tr|A0A6P2AVF2|A0A6P2AVF2_9CYAN YdcF family protein OS=Spirulina sp. DLM2.Bin59 OX=2480215 GN=EA366_08895 PE=4 SV=1	49.2857	14138000
354	E.TLF.K		380.217	1	380.217	380.218	-1.6	615	176.57	>tr|A0A6P2AV51|A0A6P2AV51_9CYAN DUF3536 domain-containing protein OS=Spirulina sp. DLM2.Bin59 OX=2480215 GN=EA366_09155 PE=4 SV=1	40.7803	14121000
355	A.AAVEETLAH.C		470.739	2	940.47	940.473	-3.7	307	200.63	>tr|A0A6P2AVL1|A0A6P2AVL1_9CYAN Phosphoribosylformylglycinamidine cyclo-ligase OS=Spirulina sp. DLM2.Bin59 OX=2480215 GN=purM PE=3 SV=1	21.2751	14068000
356	P.QELRDIYR.G		546.796	2	1092.58	1092.58	4.4	129	106.67	>tr|A0A6P2AKP8|A0A6P2AKP8_9CYAN Uncharacterized protein OS=Spirulina sp. DLM2.Bin59 OX=2480215 GN=EA366_14800 PE=4 SV=1	26.7204	14064000
357	L.SHLFRHYQ.D		544.264	2	1087.52	1087.54	-19.8	476	104.19	>tr|A0A6P2AYQ4|A0A6P2AYQ4_9CYAN Uncharacterized protein OS=Spirulina sp. DLM2.Bin59 OX=2480215 GN=EA366_03645 PE=4 SV=1	26.7204	14064000
358	L.QNYPQ.F		649.297	1	649.297	649.294	3.9	267	168.77	>tr|A0A6P2B2S4|A0A6P2B2S4_9CYAN Extracellular solute-binding protein OS=Spirulina sp. DLM2.Bin59 OX=2480215 GN=EA366_00755 PE=4 SV=1	39.8694	13902000
359	Q.EGVKYSYGQRL.R		650.351	2	1299.69	1299.67	18.8	274	103.46	>tr|A0A6P2AUF5|A0A6P2AUF5_9CYAN Thymidylate synthase OS=Spirulina sp. DLM2.Bin59 OX=2480215 GN=EA366_09290 PE=4 SV=1	39.8694	13902000
360	T.TIRFAPEKVD.G		588.322	2	1175.64	1175.64	-3.6	15	141.94	>tr|A0A6P2ANH6|A0A6P2ANH6_9CYAN Tetratricopeptide repeat protein OS=Spirulina sp. DLM2.Bin59 OX=2480215 GN=EA366_11980 PE=4 SV=1	33.8103	13880000
361	H.VTYFF.N		676.329	1	676.329	676.334	-7.7	335	101.97	>tr|A0A6P2AMN0|A0A6P2AMN0_9CYAN 2,3-bisphosphoglycerate-independent phosphoglycerate mutase OS=Spirulina sp. DLM2.Bin59 OX=2480215 GN=gpmI PE=3 SV=1	44.0861	13802000
362	D.SFPEVRA.L		403.214	2	805.42	805.42	-0.1	150	136.81	>tr|A0A6P2AY23|A0A6P2AY23_9CYAN ABC transporter substrate-binding protein OS=Spirulina sp. DLM2.Bin59 OX=2480215 GN=EA366_04075 PE=4 SV=1	15.4217	13761000
363	L.LAHFR.S		322.187	2	643.366	643.367	-2.7	582	113.69	>tr|A0A6P2B003|A0A6P2B003_9CYAN UvrABC system protein C OS=Spirulina sp. DLM2.Bin59 OX=2480215 GN=uvrC PE=3 SV=1	19.6784	13664000
364	F.GYFPF.F		630.289	1	630.289	630.292	-4.6	116	107.39	>tr|A0A6P2AW73|A0A6P2AW73_9CYAN Uncharacterized protein OS=Spirulina sp. DLM2.Bin59 OX=2480215 GN=EA366_05260 PE=4 SV=1	40.6832	13582000
365	R.LVPERGKA.V		435.259	2	869.511	869.52	-10.3	69	186.29	>tr|A0A6P2AJ61|A0A6P2AJ61_9CYAN Antitoxin OS=Spirulina sp. DLM2.Bin59 OX=2480215 GN=EA366_14945 PE=3 SV=1	29.8714	13442000
366	D.RVPGI.I		541.348	1	541.348	541.346	4	216	122.06	>tr|A0A6P2AV82|A0A6P2AV82_9CYAN Ammonium transporter OS=Spirulina sp. DLM2.Bin59 OX=2480215 GN=EA366_08415 PE=3 SV=1	25.9855	13422000
367	T.NNLIQQAGQ.H		493.26	2	985.514	985.506	7.6	203	155.48	>tr|A0A6P2AWW7|A0A6P2AWW7_9CYAN Uncharacterized protein (Fragment) OS=Spirulina sp. DLM2.Bin59 OX=2480215 GN=EA366_02350 PE=4 SV=1	39.6529	13362000
368	D.WVLQ.V		545.311	1	545.311	545.308	5.7	227	209.13	>tr|A0A6P2AJR1|A0A6P2AJR1_9CYAN DUF1574 domain-containing protein OS=Spirulina sp. DLM2.Bin59 OX=2480215 GN=EA366_15565 PE=4 SV=1	41.8335	13268000
369	L.TGQTLIC[+57.021]PVT.A	C[+57]	545.277	2	1089.55	1089.56	-12.4	34	102.99	>tr|A0A6P2AV53|A0A6P2AV53_9CYAN Vitamin K epoxide reductase family protein (Fragment) OS=Spirulina sp. DLM2.Bin59 OX=2480215 GN=EA366_06990 PE=3 SV=1	41.8335	13268000
370	A.AGPLRRF.I		408.74	2	816.472	816.484	-14.1	666	122.62	>tr|A0A6P2AWG8|A0A6P2AWG8_9CYAN Cyclic nucleotide-binding domain-containing protein (Fragment) OS=Spirulina sp. DLM2.Bin59 OX=2480215 GN=EA366_03180 PE=4 SV=1	27.7534	13153000
371	L.GVSDRVIFAGF.V		584.311	2	1167.62	1167.62	-0.6	253	114.68	>tr|A0A6P2AWS7|A0A6P2AWS7_9CYAN Glycosyltransferase family 1 protein OS=Spirulina sp. DLM2.Bin59 OX=2480215 GN=EA366_02585 PE=4 SV=1	17.136	13139000
372	R.VMV.K		348.191	1	348.191	348.195	-10.9	627	132.93	>tr|A0A6P2AM50|A0A6P2AM50_9CYAN HAMP domain-containing protein OS=Spirulina sp. DLM2.Bin59 OX=2480215 GN=EA366_12590 PE=4 SV=1	31.7554	12952000
373	L.QPQGIQQVR.L		527.295	2	1053.58	1053.58	3.3	70	126.08	>tr|A0A6P2AM16|A0A6P2AM16_9CYAN Uncharacterized protein OS=Spirulina sp. DLM2.Bin59 OX=2480215 GN=EA366_14085 PE=4 SV=1	17.5323	12952000
374	G.VRVNPL.E		349.221	2	697.434	697.436	-1.5	173	118.47	>tr|A0A6P2ATS0|A0A6P2ATS0_9CYAN Serine acetyltransferase OS=Spirulina sp. DLM2.Bin59 OX=2480215 GN=cysE PE=3 SV=1	31.7554	12952000
375	S.QGAPAGRNPW.R		527.272	2	1053.54	1053.52	13.5	495	105.63	>tr|A0A6P2AMG7|A0A6P2AMG7_9CYAN Cytochrome c oxidase subunit 1 OS=Spirulina sp. DLM2.Bin59 OX=2480215 GN=ctaD PE=3 SV=1	18.0429	12952000
376	E.QPGAFFG.M		723.343	1	723.343	723.346	-4.3	190	121.06	>tr|A0A6P2AVU8|A0A6P2AVU8_9CYAN Carotenoid biosynthesis protein OS=Spirulina sp. DLM2.Bin59 OX=2480215 GN=EA366_05550 PE=4 SV=1	32.0804	12938000
377	P.QIPHLLAYF.E		551.308	2	1101.61	1101.61	-0.3	80	204.39	>tr|A0A6P2AHP8|A0A6P2AHP8_9CYAN Serine/threonine protein kinase OS=Spirulina sp. DLM2.Bin59 OX=2480215 GN=EA366_15520 PE=4 SV=1	42.8552	12858000
378	L.TPGTYKLSGHL.G		587.307	2	1173.61	1173.63	-16.4	78	105.12	>tr|A0A6P2AVC4|A0A6P2AVC4_9CYAN Uncharacterized protein (Fragment) OS=Spirulina sp. DLM2.Bin59 OX=2480215 GN=EA366_08375 PE=4 SV=1	32.9091	12821000
379	K.ANYR.A		523.265	1	523.265	523.262	4.6	199	117.95	>tr|A0A6P2ATA0|A0A6P2ATA0_9CYAN ABC transporter ATP-binding protein OS=Spirulina sp. DLM2.Bin59 OX=2480215 GN=EA366_09445 PE=4 SV=1	17.1698	12793000
380	S.QC[+57.021]RHLLDR.G	C[+57]	549.282	2	1097.56	1097.56	-6.3	268	126.16	>tr|A0A6P2AUP8|A0A6P2AUP8_9CYAN DNA polymerase III subunit gamma/tau (Fragment) OS=Spirulina sp. DLM2.Bin59 OX=2480215 GN=dnaX PE=3 SV=1	18.0349	12774000
381	P.TVVV.A		417.272	1	417.272	417.271	3.5	247	171.9	>tr|A0A6P2AUP4|A0A6P2AUP4_9CYAN Cytochrome f OS=Spirulina sp. DLM2.Bin59 OX=2480215 GN=petA PE=3 SV=1	33.9666	12617000
382	S.TTMFE.M		314.64	2	628.272	628.265	11.5	627	160.51	>tr|A0A6P2AV51|A0A6P2AV51_9CYAN DUF3536 domain-containing protein OS=Spirulina sp. DLM2.Bin59 OX=2480215 GN=EA366_09155 PE=4 SV=1	18.6469	12468000
383	M.LGDILLDT.Q		859.487	1	859.487	859.477	11	193	134.09	>tr|A0A6P2AQU3|A0A6P2AQU3_9CYAN PAS domain S-box protein OS=Spirulina sp. DLM2.Bin59 OX=2480215 GN=EA366_10895 PE=4 SV=1	30.4903	12369000
384	R.LLVALHGWGANLQD.L		753.912	2	1506.82	1506.81	6.6	19	106	>tr|A0A6P2AYB0|A0A6P2AYB0_9CYAN Alpha/beta hydrolase OS=Spirulina sp. DLM2.Bin59 OX=2480215 GN=EA366_03090 PE=4 SV=1	43.9836	12331000
385	M.TTNQEAALQ.A		488.232	2	975.457	975.474	-17.8	244	122.53	>tr|A0A6P2ASM9|A0A6P2ASM9_9CYAN Tetratricopeptide repeat protein OS=Spirulina sp. DLM2.Bin59 OX=2480215 GN=EA366_10650 PE=4 SV=1	18.7114	12284000
386	A.TVM[+15.995]PQLGVD.E	M[+16]	488.251	2	975.494	975.482	12.6	171	101.31	>tr|A0A6P2AIP1|A0A6P2AIP1_9CYAN Glycosyltransferase family 4 protein OS=Spirulina sp. DLM2.Bin59 OX=2480215 GN=EA366_14745 PE=4 SV=1	18.7114	12284000
387	F.IGPSGC[+57.021]GKST.L	C[+57]	482.235	2	963.462	963.456	5.6	43	154.75	>tr|A0A6P2AVN4|A0A6P2AVN4_9CYAN Phosphate import ATP-binding protein PstB OS=Spirulina sp. DLM2.Bin59 OX=2480215 GN=pstB PE=3 SV=1	26.5739	12188000
388	A.LQGVVVQGQ.Q		464.267	2	927.528	927.526	2.2	136	107.39	>tr|A0A6P2AYY4|A0A6P2AYY4_9CYAN Bifunctional riboflavin kinase/FMN adenylyltransferase (Fragment) OS=Spirulina sp. DLM2.Bin59 OX=2480215 GN=EA366_00050 PE=3 SV=1	40.6062	12179000
389	A.LGQGFVDRG.F		474.75	2	948.493	948.49	3.3	298	219.72	>tr|A0A6P2AV59|A0A6P2AV59_9CYAN Serine hydroxymethyltransferase OS=Spirulina sp. DLM2.Bin59 OX=2480215 GN=glyA PE=3 SV=1	24.5481	12170000
390	V.LNYSM[+15.995]GLP.R	M[+16]	455.72	2	910.432	910.434	-1.6	99	117.18	>tr|A0A6P2AWM5|A0A6P2AWM5_9CYAN NAD(P)H-quinone oxidoreductase subunit M OS=Spirulina sp. DLM2.Bin59 OX=2480215 GN=ndhM PE=3 SV=1	38.0258	12141000
391	I.VEGYY.L		630.28	1	630.28	630.277	4.6	612	108.45	>tr|A0A6P2B108|A0A6P2B108_9CYAN DUF4157 domain-containing protein OS=Spirulina sp. DLM2.Bin59 OX=2480215 GN=EA366_00790 PE=4 SV=1	38.4745	12079000
392	A.QLPQ.L		485.274	1	485.274	485.272	4.5	136	186.94	>tr|A0A6P2AX72|A0A6P2AX72_9CYAN SulP family inorganic anion transporter OS=Spirulina sp. DLM2.Bin59 OX=2480215 GN=EA366_03340 PE=4 SV=1	15.8964	12006000
393	G.GALETVR.D		373.214	2	745.42	745.42	-0.2	300	154.93	>tr|A0A6P2ART6|A0A6P2ART6_9CYAN Glycosyltransferase family 4 protein OS=Spirulina sp. DLM2.Bin59 OX=2480215 GN=EA366_10630 PE=4 SV=1	20.18	11921000
394	D.LIPYWR.Q		424.246	2	847.484	847.482	1.6	149	174.07	>tr|A0A6P2AWB7|A0A6P2AWB7_9CYAN DUF3120 domain-containing protein OS=Spirulina sp. DLM2.Bin59 OX=2480215 GN=EA366_03450 PE=4 SV=1	31.3984	11866000
395	L.QPQPETAL.V		883.445	1	883.445	883.452	-7.8	6	136.07	>tr|A0A6P2B0R2|A0A6P2B0R2_9CYAN Integrase (Fragment) OS=Spirulina sp. DLM2.Bin59 OX=2480215 GN=EA366_01370 PE=4 SV=1	32.4538	11757000
396	E.VLMRDR.L		395.229	2	789.45	789.44	12.6	128	109.81	>tr|A0A6P2AQR5|A0A6P2AQR5_9CYAN DUF1230 family protein OS=Spirulina sp. DLM2.Bin59 OX=2480215 GN=EA366_11390 PE=4 SV=1	27.6384	11682000
397	T.QQPQWFP.D		465.729	2	930.45	930.447	3.8	118	149.61	>tr|A0A6P2AS94|A0A6P2AS94_9CYAN EAL domain-containing protein (Fragment) OS=Spirulina sp. DLM2.Bin59 OX=2480215 GN=EA366_10275 PE=4 SV=1	47.809	11556000
398	L.PQINSQQ.W		814.403	1	814.403	814.405	-2.4	75	153.35	>tr|A0A6P2AWP0|A0A6P2AWP0_9CYAN SWIM-type domain-containing protein OS=Spirulina sp. DLM2.Bin59 OX=2480215 GN=EA366_04290 PE=4 SV=1	11.4297	11547000
399	I.APGQPNSQ.M		798.374	1	798.374	798.374	-0.4	572	112.95	>tr|A0A6P2AYF6|A0A6P2AYF6_9CYAN Acetolactate synthase OS=Spirulina sp. DLM2.Bin59 OX=2480215 GN=ilvB PE=3 SV=1	17.513	11465000
400	F.GAHTYER.I		417.2	2	833.393	833.39	3.5	451	145.36	>tr|A0A6P2AIN7|A0A6P2AIN7_9CYAN 6-phosphogluconate dehydrogenase, decarboxylating OS=Spirulina sp. DLM2.Bin59 OX=2480215 GN=gnd PE=3 SV=1	11.7278	11405000
401	F.NDNDLA.N		661.295	1	661.295	661.279	24.2	652	137.03	>tr|A0A6P2AQ26|A0A6P2AQ26_9CYAN ATP-binding protein OS=Spirulina sp. DLM2.Bin59 OX=2480215 GN=EA366_11810 PE=4 SV=1	45.5148	11147000
402	P.HAILLQ.A		694.424	1	694.424	694.425	-1.4	662	255.05	>tr|A0A6P2ANY1|A0A6P2ANY1_9CYAN DEAD/DEAH box helicase (Fragment) OS=Spirulina sp. DLM2.Bin59 OX=2480215 GN=EA366_12030 PE=4 SV=1	27.7992	11136000
403	V.ILC[+57.021]ERG.L	C[+57]	374.194	2	747.381	747.382	-1.3	240	101.84	>tr|A0A6P2AXC1|A0A6P2AXC1_9CYAN 3-deoxy-7-phosphoheptulonate synthase OS=Spirulina sp. DLM2.Bin59 OX=2480215 GN=aroF PE=4 SV=1	16.7674	11055000
404	T.HTYIC[+57.021].G	C[+57]	693.306	1	693.306	693.303	5.1	248	105.13	>sp|P00454|FENR_SPISP Ferredoxin--NADP reductase OS=Spirulina sp. OX=1157 GN=petH PE=1 SV=1	34.3438	11010000
405	G.AGELW.G		575.284	1	575.284	575.282	3.7	262	206.32	>tr|A0A6P2AL24|A0A6P2AL24_9CYAN Peptidoglycan glycosyltransferase RodA OS=Spirulina sp. DLM2.Bin59 OX=2480215 GN=rodA PE=3 SV=1	45.3359	10982000
406	K.QGAGF.H		479.216	1	479.216	479.225	-18.3	90	153.87	>tr|A0A6P2AXR4|A0A6P2AXR4_9CYAN Phosphotransacetylase family protein OS=Spirulina sp. DLM2.Bin59 OX=2480215 GN=EA366_08510 PE=4 SV=1	46.0806	10977000
407	S.TDWPMV.S		374.672	2	748.337	748.333	4.5	486	121.28	>tr|A0A6P2AXW3|A0A6P2AXW3_9CYAN 1,4-alpha-glucan branching enzyme GlgB OS=Spirulina sp. DLM2.Bin59 OX=2480215 GN=glgB PE=3 SV=1	17.0861	10896000
408	N.QSQLEFYPY.R		587.781	2	1174.55	1174.54	11.4	1127	104.54	>tr|A0A6P2ANY1|A0A6P2ANY1_9CYAN DEAD/DEAH box helicase (Fragment) OS=Spirulina sp. DLM2.Bin59 OX=2480215 GN=EA366_12030 PE=4 SV=1	26.5207	10891000
409	Y.QLVY.F		522.296	1	522.296	522.292	7.1	104	138.51	>tr|A0A6P2AWU4|A0A6P2AWU4_9CYAN Colanic acid biosynthesis glycosyltransferase WcaL OS=Spirulina sp. DLM2.Bin59 OX=2480215 GN=EA366_09460 PE=4 SV=1	33.9896	10875000
410	G.QIPY.Q		520.279	1	520.279	520.277	5.1	1420	106.12	>tr|A0A6P2AYU0|A0A6P2AYU0_9CYAN Uncharacterized protein OS=Spirulina sp. DLM2.Bin59 OX=2480215 GN=EA366_04890 PE=4 SV=1	33.9896	10875000
411	S.QPQLATNLQT.G		557.291	2	1113.57	1113.59	-13.8	205	140.29	>tr|A0A6P2AXV1|A0A6P2AXV1_9CYAN Uncharacterized protein (Fragment) OS=Spirulina sp. DLM2.Bin59 OX=2480215 GN=EA366_03270 PE=4 SV=1	35.6067	10868000
412	G.GAPQPGFRDY.A		554.262	2	1107.52	1107.52	-5.2	457	107.2	>tr|A0A6P2AV24|A0A6P2AV24_9CYAN Signal recognition particle protein OS=Spirulina sp. DLM2.Bin59 OX=2480215 GN=ffh PE=3 SV=1	28.538	10805000
413	D.GSFRPS.L		325.666	2	650.324	650.326	-1.8	70	116.57	>tr|A0A6P2AK23|A0A6P2AK23_9CYAN S-layer homology domain-containing protein OS=Spirulina sp. DLM2.Bin59 OX=2480215 GN=EA366_15395 PE=4 SV=1	15.2894	10779000
414	Q.ITYFY.D		353.679	2	706.351	706.345	9.6	53	109.06	>tr|A0A6P2AN36|A0A6P2AN36_9CYAN RusA family crossover junction endodeoxyribonuclease OS=Spirulina sp. DLM2.Bin59 OX=2480215 GN=EA366_12405 PE=4 SV=1	16.2721	10778000
415	I.QVALQ.I		558.327	1	558.327	558.325	5.2	395	125.62	>tr|A0A6P2AZ82|A0A6P2AZ82_9CYAN Magnesium chelatase OS=Spirulina sp. DLM2.Bin59 OX=2480215 GN=EA366_04130 PE=3 SV=1	29.5406	10716000
416	D.VYPLSF.A		363.203	2	725.399	725.387	16.9	98	108.4	>tr|A0A6P2AVE5|A0A6P2AVE5_9CYAN DUF4276 family protein OS=Spirulina sp. DLM2.Bin59 OX=2480215 GN=EA366_08220 PE=4 SV=1	25.1147	10643000
417	R.LGPY.A		449.242	1	449.242	449.24	6	14	138.98	>tr|A0A6P2ATA0|A0A6P2ATA0_9CYAN ABC transporter ATP-binding protein OS=Spirulina sp. DLM2.Bin59 OX=2480215 GN=EA366_09445 PE=4 SV=1	32.4182	10629000
418	I.IGY.L		352.187	1	352.187	352.187	0	32	107.64	>tr|A0A6P2AM50|A0A6P2AM50_9CYAN HAMP domain-containing protein OS=Spirulina sp. DLM2.Bin59 OX=2480215 GN=EA366_12590 PE=4 SV=1	25.8487	10399000
419	S.QTLTGR.E		675.368	1	675.368	675.378	-14.9	98	121.13	>tr|A0A6P2AYU2|A0A6P2AYU2_9CYAN Hydrogenase maturation factor HypA OS=Spirulina sp. DLM2.Bin59 OX=2480215 GN=hypA PE=3 SV=1	20.596	10336000
420	V.IQPREL.R		378.224	2	755.44	755.441	-1.3	175	162.22	>tr|A0A6P2AW38|A0A6P2AW38_9CYAN DUF3370 domain-containing protein OS=Spirulina sp. DLM2.Bin59 OX=2480215 GN=EA366_09020 PE=4 SV=1	11.8183	10259000
421	V.TVAY.R		453.236	1	453.236	453.234	4.4	518	141.13	>tr|A0A6P2AYA0|A0A6P2AYA0_9CYAN Polysaccharide biosynthesis tyrosine autokinase OS=Spirulina sp. DLM2.Bin59 OX=2480215 GN=EA366_03105 PE=4 SV=1	28.4438	10249000
422	V.TVGQPHIK.V		440.251	2	879.495	879.505	-10.6	475	105.58	>tr|A0A6P2AU50|A0A6P2AU50_9CYAN TldD/PmbA family protein OS=Spirulina sp. DLM2.Bin59 OX=2480215 GN=EA366_08605 PE=3 SV=1	22.1822	10130000
423	P.GVSYIGEF.E		436.221	2	871.434	871.42	16.4	14	103.58	>tr|A0A6P2AX63|A0A6P2AX63_9CYAN DUF455 domain-containing protein (Fragment) OS=Spirulina sp. DLM2.Bin59 OX=2480215 GN=EA366_03335 PE=4 SV=1	25.8	10042000
424	E.QLAQQFPELR.A		615.339	2	1229.67	1229.66	5.4	66	193.33	>tr|A0A6P2AT90|A0A6P2AT90_9CYAN Primosomal protein N (Fragment) OS=Spirulina sp. DLM2.Bin59 OX=2480215 GN=priA PE=4 SV=1	41.9064	9990600
425	P.QLAFH.E		615.339	1	615.339	615.325	22.6	356	145.35	>tr|A0A6P2ATR2|A0A6P2ATR2_9CYAN Peptidylprolyl isomerase OS=Spirulina sp. DLM2.Bin59 OX=2480215 GN=EA366_07675 PE=4 SV=1	41.9064	9990600
426	L.WVLAG.E		545.309	1	545.309	545.308	1.9	478	228.15	>tr|A0A6P2AHQ4|A0A6P2AHQ4_9CYAN DNA-directed RNA polymerase subunit beta' OS=Spirulina sp. DLM2.Bin59 OX=2480215 GN=rpoC2 PE=3 SV=1	42.7636	9974600
427	E.TLPA.A		401.241	1	401.241	401.24	3.4	414	146.12	>tr|A0A6P2AZJ7|A0A6P2AZJ7_9CYAN Phosphoenolpyruvate synthase OS=Spirulina sp. DLM2.Bin59 OX=2480215 GN=EA366_06245 PE=4 SV=1	18.7086	9969900
428	Q.QILPR.Q		313.703	2	626.398	626.398	-0.8	246	101.01	>tr|A0A6P2AYI8|A0A6P2AYI8_9CYAN Dihydroxy-acid dehydratase (Fragment) OS=Spirulina sp. DLM2.Bin59 OX=2480215 GN=ilvD PE=3 SV=1	22.8239	9954700
429	W.IYVPI.V		604.373	1	604.373	604.37	3.6	183	139.23	>tr|A0A6P2AM16|A0A6P2AM16_9CYAN Uncharacterized protein OS=Spirulina sp. DLM2.Bin59 OX=2480215 GN=EA366_14085 PE=4 SV=1	51.5921	9895300
430	R.QSPQSF.N		693.324	1	693.324	693.32	5.1	84	131.2	>tr|A0A6P2AWG9|A0A6P2AWG9_9CYAN Tetratricopeptide repeat protein (Fragment) OS=Spirulina sp. DLM2.Bin59 OX=2480215 GN=EA366_04650 PE=4 SV=1	26.6169	9831200
431	D.SRYPVHC[+57.021]F.V	C[+57]	533.257	2	1065.51	1065.49	12.4	111	101.05	>tr|A0A6P2AIL4|A0A6P2AIL4_9CYAN Non-specific serine/threonine protein kinase OS=Spirulina sp. DLM2.Bin59 OX=2480215 GN=EA366_14970 PE=4 SV=1	32.6468	9830300
432	G.SVFAFP.P		334.176	2	667.345	667.345	-0.7	317	164.98	>tr|A0A6P2AH55|A0A6P2AH55_9CYAN CRISPR system Cms protein Csm4 OS=Spirulina sp. DLM2.Bin59 OX=2480215 GN=csm4 PE=3 SV=1	26.7293	9818500
433	T.SVFEW.S		334.158	2	667.308	667.309	-0.2	85	114.19	>tr|A0A6P2ATV9|A0A6P2ATV9_9CYAN PEP-CTERM sorting domain-containing protein OS=Spirulina sp. DLM2.Bin59 OX=2480215 GN=EA366_09695 PE=4 SV=1	26.7293	9818500
434	L.VYPGLFNG.S		433.721	2	866.436	866.441	-5.9	500	149.67	>tr|A0A6P2AYP0|A0A6P2AYP0_9CYAN Type III-B CRISPR-associated protein Cas10/Cmr2 OS=Spirulina sp. DLM2.Bin59 OX=2480215 GN=EA366_02935 PE=4 SV=1	19.2146	9580600
435	G.QPVLE.G		585.327	1	585.327	585.324	4.8	234	124.74	>tr|A0A6P2AJ52|A0A6P2AJ52_9CYAN AMIN domain-containing protein (Fragment) OS=Spirulina sp. DLM2.Bin59 OX=2480215 GN=EA366_14980 PE=4 SV=1	32.7086	9562100
436	R.YYLE.F		587.274	1	587.274	587.271	4.8	475	118.74	>tr|A0A6P2ALY0|A0A6P2ALY0_9CYAN NgoFVII family restriction endonuclease OS=Spirulina sp. DLM2.Bin59 OX=2480215 GN=EA366_13230 PE=4 SV=1	32.7086	9562100
437	G.PVLHPL.Y		338.213	2	675.419	675.419	0.3	157	241.7	>tr|A0A6P2AZI6|A0A6P2AZI6_9CYAN Probable membrane transporter protein OS=Spirulina sp. DLM2.Bin59 OX=2480215 GN=EA366_01465 PE=3 SV=1	34.1583	9508400
438	L.PVLHLP.Q		338.214	2	675.422	675.419	4.3	264	137.3	>tr|A0A6P2ASR6|A0A6P2ASR6_9CYAN Heterodisulfide reductase OS=Spirulina sp. DLM2.Bin59 OX=2480215 GN=EA366_09620 PE=4 SV=1	33.6548	9508400
439	L.AASLPQA.Q		657.357	1	657.357	657.357	0.6	40	132.39	>tr|A0A6P2AMG2|A0A6P2AMG2_9CYAN 5-formyltetrahydrofolate cyclo-ligase (Fragment) OS=Spirulina sp. DLM2.Bin59 OX=2480215 GN=EA366_13955 PE=3 SV=1	19.4284	9480700
440	R.EHIPQT.A		362.685	2	724.362	724.362	0	121	186.5	>tr|A0A6P2AK27|A0A6P2AK27_9CYAN Polyamine aminopropyltransferase OS=Spirulina sp. DLM2.Bin59 OX=2480215 GN=speE PE=3 SV=1	15.8936	9460300
441	V.APF.R		334.176	1	334.176	334.176	-0.1	326	130.38	>tr|A0A6P2AM50|A0A6P2AM50_9CYAN HAMP domain-containing protein OS=Spirulina sp. DLM2.Bin59 OX=2480215 GN=EA366_12590 PE=4 SV=1	27.5066	9342100
442	Y.ILPR.F		498.342	1	498.342	498.34	3.6	160	161.21	>tr|A0A6P2AX72|A0A6P2AX72_9CYAN SulP family inorganic anion transporter OS=Spirulina sp. DLM2.Bin59 OX=2480215 GN=EA366_03340 PE=4 SV=1	22.9403	9314800
443	Q.GQLQGNHAVA.R		497.759	2	994.511	994.506	4.2	373	146.79	>tr|A0A6P2APD3|A0A6P2APD3_9CYAN EAL domain-containing protein OS=Spirulina sp. DLM2.Bin59 OX=2480215 GN=EA366_12615 PE=4 SV=1	22.9403	9314800
444	P.QPQPELRSQ.L		541.787	2	1082.57	1082.56	7.4	186	154.22	>tr|A0A6P2AIP1|A0A6P2AIP1_9CYAN Glycosyltransferase family 4 protein OS=Spirulina sp. DLM2.Bin59 OX=2480215 GN=EA366_14745 PE=4 SV=1	35.5182	9306600
445	I.QFSINPQ.N		417.212	2	833.417	833.415	2	286	153.15	>tr|A0A6P2AY40|A0A6P2AY40_9CYAN Carbamoyl-phosphate synthase large chain OS=Spirulina sp. DLM2.Bin59 OX=2480215 GN=carB PE=3 SV=1	28.0364	9249500
446	F.HVY.C		418.208	1	418.208	418.209	-0.2	183	178.95	>tr|A0A6P2AY04|A0A6P2AY04_9CYAN Helicase (Fragment) OS=Spirulina sp. DLM2.Bin59 OX=2480215 GN=EA366_03670 PE=4 SV=1	12.5944	9167300
447	V.AATEPAC[+57.021]A.I	C[+57]	790.332	1	790.332	790.34	-10.4	178	122.83	>tr|A0A6P2AZI9|A0A6P2AZI9_9CYAN UDP-N-acetylglucosamine 2-epimerase (Non-hydrolyzing) OS=Spirulina sp. DLM2.Bin59 OX=2480215 GN=EA366_06295 PE=3 SV=1	41.0601	9152800
448	G.DGRYIAP.L		396.205	2	791.404	791.405	-1.1	666	117.56	>tr|A0A6P2AL84|A0A6P2AL84_9CYAN DUF11 domain-containing protein OS=Spirulina sp. DLM2.Bin59 OX=2480215 GN=EA366_14385 PE=4 SV=1	27.427	9082600
449	Y.IVY.L		394.234	1	394.234	394.234	0.9	4	110.21	>tr|A0A6P2AZJ7|A0A6P2AZJ7_9CYAN Phosphoenolpyruvate synthase OS=Spirulina sp. DLM2.Bin59 OX=2480215 GN=EA366_06245 PE=4 SV=1	27.427	9082600
450	R.QGQATAQELAE.S		573.272	2	1145.54	1145.54	-5.3	20	110.72	>tr|A0A6P2AST9|A0A6P2AST9_9CYAN Iron-sulfur cluster biosynthesis transcriptional regulator SufR OS=Spirulina sp. DLM2.Bin59 OX=2480215 GN=sufR PE=4 SV=1	17.8773	9036300
451	I.TYGP.F		437.202	1	437.202	437.203	-2.5	353	108.78	>tr|A0A6P2ALE8|A0A6P2ALE8_9CYAN ABC transporter permease OS=Spirulina sp. DLM2.Bin59 OX=2480215 GN=EA366_15150 PE=4 SV=1	17.2664	9032700
452	L.ISPPPHHDIY.S		588.298	2	1175.59	1175.58	4.1	992	164.66	>tr|A0A6P2B1K3|A0A6P2B1K3_9CYAN Glutamate synthase large subunit OS=Spirulina sp. DLM2.Bin59 OX=2480215 GN=EA366_02595 PE=3 SV=1	20.7805	9001800
453	T.LINEAK.K		344.205	2	687.403	687.404	-1.2	323	163.09	>tr|A0A6P2ASK8|A0A6P2ASK8_9CYAN Chromosome segregation ATPase OS=Spirulina sp. DLM2.Bin59 OX=2480215 GN=EA366_11080 PE=4 SV=1	16.8803	8975300
454	A.TVHRY.V		338.182	2	675.357	675.357	-0.8	18	150.83	>tr|A0A6P2AL79|A0A6P2AL79_9CYAN Heat-inducible transcription repressor HrcA OS=Spirulina sp. DLM2.Bin59 OX=2480215 GN=hrcA PE=3 SV=1	15.2908	8961900
455	S.LEPRY.L		339.184	2	677.361	677.362	-1.7	443	148	>tr|A0A6P2APK3|A0A6P2APK3_9CYAN Response regulator OS=Spirulina sp. DLM2.Bin59 OX=2480215 GN=EA366_11630 PE=4 SV=1	15.2908	8961900
456	R.DLYVR.R		333.184	2	665.36	665.362	-2.5	305	206.74	>tr|A0A6P2AVW4|A0A6P2AVW4_9CYAN DEAD/DEAH box helicase OS=Spirulina sp. DLM2.Bin59 OX=2480215 GN=EA366_05910 PE=4 SV=1	24.708	8946300
457	T.QLQDYVAF.C		492.249	2	983.491	983.483	7.5	248	164.14	>tr|A0A6P2AXD4|A0A6P2AXD4_9CYAN Tetratricopeptide repeat protein OS=Spirulina sp. DLM2.Bin59 OX=2480215 GN=EA366_04875 PE=4 SV=1	15.4096	8926400
458	R.LSPEQQARR.W		542.792	2	1084.58	1084.59	-8.3	182	111.7	>tr|A0A6P2AYQ6|A0A6P2AYQ6_9CYAN Uncharacterized protein OS=Spirulina sp. DLM2.Bin59 OX=2480215 GN=EA366_05075 PE=4 SV=1	15.5347	8895200
459	L.IALLFRFAQ.S		539.824	2	1078.64	1078.64	0.6	221	191.66	>tr|A0A6P2APU5|A0A6P2APU5_9CYAN Sugar ABC transporter permease OS=Spirulina sp. DLM2.Bin59 OX=2480215 GN=EA366_11650 PE=3 SV=1	17.6357	8893200
460	Q.QGIVV.E		515.321	1	515.321	515.319	4.4	678	208.46	>tr|A0A6P2ANT8|A0A6P2ANT8_9CYAN DEAD/DEAH box helicase (Fragment) OS=Spirulina sp. DLM2.Bin59 OX=2480215 GN=EA366_14625 PE=4 SV=1	32.9799	8881300
461	A.LGQPHQWY.F		514.753	2	1028.5	1028.49	3.4	147	134.86	>tr|A0A6P2AXJ3|A0A6P2AXJ3_9CYAN DUF928 domain-containing protein OS=Spirulina sp. DLM2.Bin59 OX=2480215 GN=EA366_05890 PE=4 SV=1	32.9799	8881300
462	K.IHFFDPQ.T		452.22	2	903.432	903.436	-4.4	393	160.09	>tr|A0A6P2AKN9|A0A6P2AKN9_9CYAN ABC transporter ATP-binding protein OS=Spirulina sp. DLM2.Bin59 OX=2480215 GN=EA366_14975 PE=4 SV=1	15.2025	8870700
463	E.QVPL.G		456.284	1	456.284	456.282	4.5	595	129.94	>tr|A0A6P2AYU0|A0A6P2AYU0_9CYAN Uncharacterized protein OS=Spirulina sp. DLM2.Bin59 OX=2480215 GN=EA366_04890 PE=4 SV=1	29.1577	8854700
464	I.TVPHDP.A		333.17	2	665.332	665.325	9.7	48	124.03	>tr|A0A6P2AMQ6|A0A6P2AMQ6_9CYAN Tryptophan--tRNA ligase OS=Spirulina sp. DLM2.Bin59 OX=2480215 GN=trpS PE=3 SV=1	32.1109	8586000
465	H.SPGF.A		407.192	1	407.192	407.192	-1.1	460	203.06	>tr|A0A6P2AJA6|A0A6P2AJA6_9CYAN Uncharacterized protein OS=Spirulina sp. DLM2.Bin59 OX=2480215 GN=EA366_15880 PE=4 SV=1	25.8474	8555400
466	W.TVDDLSTALLM.I		589.801	2	1178.6	1178.6	-1.6	225	111.08	>tr|A0A6P2AY13|A0A6P2AY13_9CYAN CHAT domain-containing protein (Fragment) OS=Spirulina sp. DLM2.Bin59 OX=2480215 GN=EA366_01835 PE=4 SV=1	60.7129	8546800
467	S.SQPQGLR.E		393.216	2	785.425	785.426	-1.5	202	136.89	>tr|A0A6P2AM15|A0A6P2AM15_9CYAN Urease subunit alpha OS=Spirulina sp. DLM2.Bin59 OX=2480215 GN=ureC PE=3 SV=1	10.7404	8517200
468	K.AVVPF.R		532.315	1	532.315	532.313	4.5	169	172.55	>tr|A0A6P2AKE4|A0A6P2AKE4_9CYAN Anthranilate phosphoribosyltransferase OS=Spirulina sp. DLM2.Bin59 OX=2480215 GN=trpD PE=3 SV=1	53.4168	8457500
469	T.TTFYM.A		331.642	2	662.276	662.285	-14	43	117.91	>tr|A0A6P2AXV6|A0A6P2AXV6_9CYAN LPS export ABC transporter ATP-binding protein OS=Spirulina sp. DLM2.Bin59 OX=2480215 GN=lptB PE=4 SV=1	19.0315	8311400
470	A.LGQFMNYR.R		514.755	2	1028.5	1028.5	5	117	113.86	>tr|A0A6P2ATU3|A0A6P2ATU3_9CYAN Fatty-acid oxidation protein subunit alpha OS=Spirulina sp. DLM2.Bin59 OX=2480215 GN=EA366_09735 PE=4 SV=1	33.2438	8303200
471	T.TTIGPGTK.V		387.721	2	774.436	774.436	0	223	141.85	>tr|A0A6P2AVE7|A0A6P2AVE7_9CYAN UDP-3-O-acylglucosamine N-acyltransferase OS=Spirulina sp. DLM2.Bin59 OX=2480215 GN=lpxD PE=3 SV=1	15.4706	8273100
472	F.TTPEAIAA.A		387.199	2	773.39	773.404	-17.8	212	109.69	>tr|A0A6P2B2L7|A0A6P2B2L7_9CYAN L-lactate dehydrogenase OS=Spirulina sp. DLM2.Bin59 OX=2480215 GN=ldh PE=3 SV=1	15.4706	8273100
473	R.IGSY.L		439.22	1	439.22	439.219	2.1	208	233.99	>tr|A0A6P2AS54|A0A6P2AS54_9CYAN ATP-binding cassette domain-containing protein OS=Spirulina sp. DLM2.Bin59 OX=2480215 GN=EA366_11130 PE=4 SV=1	22.0528	8258100
474	D.AGPAGLQP.A		710.382	1	710.382	710.383	-1.1	600	112.74	>tr|A0A6P2AUE3|A0A6P2AUE3_9CYAN Glutamate synthase large subunit OS=Spirulina sp. DLM2.Bin59 OX=2480215 GN=EA366_06880 PE=3 SV=1	18.9224	8140200
475	F.PQIPY.L		617.332	1	617.332	617.329	4.5	32	126.78	>tr|A0A6P2AUY3|A0A6P2AUY3_9CYAN Cytochrome c biogenesis protein CcsA OS=Spirulina sp. DLM2.Bin59 OX=2480215 GN=ccsB PE=3 SV=1	45.1743	8062000
476	L.LYQPH.T		329.171	2	657.335	657.336	-1.2	60	169.41	>tr|A0A6P2AL79|A0A6P2AL79_9CYAN Heat-inducible transcription repressor HrcA OS=Spirulina sp. DLM2.Bin59 OX=2480215 GN=hrcA PE=3 SV=1	20.8094	8040200
477	Y.QPHT.S		482.237	1	482.237	482.236	1.9	62	232.03	>tr|A0A6P2AL79|A0A6P2AL79_9CYAN Heat-inducible transcription repressor HrcA OS=Spirulina sp. DLM2.Bin59 OX=2480215 GN=hrcA PE=3 SV=1	30.36	7856200
478	A.QIVIQ.P		600.376	1	600.376	600.371	7.2	172	118.45	>tr|A0A6P2AW38|A0A6P2AW38_9CYAN DUF3370 domain-containing protein OS=Spirulina sp. DLM2.Bin59 OX=2480215 GN=EA366_09020 PE=4 SV=1	33.1854	7791500
479	P.TGYREPV.L		411.213	2	821.418	821.415	3.2	47	142.23	>tr|A0A6P2AVL1|A0A6P2AVL1_9CYAN Phosphoribosylformylglycinamidine cyclo-ligase OS=Spirulina sp. DLM2.Bin59 OX=2480215 GN=purM PE=3 SV=1	17.4993	7652500
480	F.FSSEAGAY.L		416.182	2	831.356	831.352	4.9	32	123.43	>tr|A0A6P2ARB7|A0A6P2ARB7_9CYAN Uma2 family endonuclease OS=Spirulina sp. DLM2.Bin59 OX=2480215 GN=EA366_11020 PE=4 SV=1	24.3325	7644000
481	A.LPV.E		328.223	1	328.223	328.223	-1.3	282	104.94	>tr|A0A6P2AUX9|A0A6P2AUX9_9CYAN Glycosyltransferase family 9 protein OS=Spirulina sp. DLM2.Bin59 OX=2480215 GN=EA366_08575 PE=4 SV=1	26.5893	7618800
482	R.TVPAVPYK.D		437.755	2	874.503	874.503	-0.6	115	196.69	>tr|A0A6P2AWL0|A0A6P2AWL0_9CYAN Cysteine synthase A OS=Spirulina sp. DLM2.Bin59 OX=2480215 GN=EA366_04445 PE=4 SV=1	18.12	7550500
483	R.SLAAC[+57.021]EEF.I	C[+57]	463.706	2	926.404	926.392	12.8	5	117.52	>tr|A0A6P2AZA1|A0A6P2AZA1_9CYAN Cupin domain-containing protein OS=Spirulina sp. DLM2.Bin59 OX=2480215 GN=EA366_03980 PE=4 SV=1	38.0091	7536900
484	Q.TVITTTH.L		386.709	2	772.411	772.42	-11.2	342	117.94	>tr|A0A6P2AV71|A0A6P2AV71_9CYAN DNA replication and repair protein RecF OS=Spirulina sp. DLM2.Bin59 OX=2480215 GN=recF PE=3 SV=1	21.7372	7533100
485	T.TAAQQQE.L		388.185	2	775.363	775.358	6.7	274	103.47	>tr|A0A6P2AJL0|A0A6P2AJL0_9CYAN Uncharacterized protein OS=Spirulina sp. DLM2.Bin59 OX=2480215 GN=EA366_15555 PE=4 SV=1	21.7372	7533100
486	C.IIGFIEGII.Y		487.808	2	974.609	974.592	17	59	123.88	>tr|A0A6P2AX58|A0A6P2AX58_9CYAN TM2 domain-containing protein OS=Spirulina sp. DLM2.Bin59 OX=2480215 GN=EA366_05810 PE=4 SV=1	46.6024	7506900
487	Q.IPQQP.F		582.326	1	582.326	582.325	3	136	199.74	>tr|A0A6P2AVJ2|A0A6P2AVJ2_9CYAN PAS domain S-box protein OS=Spirulina sp. DLM2.Bin59 OX=2480215 GN=EA366_04855 PE=4 SV=1	20.0323	7470600
488	N.TAAQLDFIGQ.S		532.282	2	1063.56	1063.54	14.5	214	151.09	>tr|A0A6P2ARN6|A0A6P2ARN6_9CYAN Uncharacterized protein OS=Spirulina sp. DLM2.Bin59 OX=2480215 GN=EA366_11370 PE=4 SV=1	25.0295	7394800
489	L.QQQILTSPPQ.Q		570.317	2	1139.63	1139.61	18.9	33	133.59	>tr|A0A6P2AVQ3|A0A6P2AVQ3_9CYAN Uncharacterized protein OS=Spirulina sp. DLM2.Bin59 OX=2480215 GN=EA366_08535 PE=4 SV=1	48.4529	7362500
490	E.IPFYLLL.G		439.778	2	878.549	878.539	12	247	104.24	>tr|A0A6P2AWC5|A0A6P2AWC5_9CYAN CBS domain-containing protein OS=Spirulina sp. DLM2.Bin59 OX=2480215 GN=EA366_03430 PE=4 SV=1	46.3916	7342400
491	D.VHYGQFLAPGV.I		594.312	2	1187.62	1187.62	-4.3	78	125.18	>tr|A0A6P2APZ1|A0A6P2APZ1_9CYAN Transport permease protein OS=Spirulina sp. DLM2.Bin59 OX=2480215 GN=EA366_12335 PE=3 SV=1	47.4405	7234400
492	C.QPEPSPPQGL.T		525.27	2	1049.53	1049.53	5.4	54	174.3	>tr|A0A6P2AKQ0|A0A6P2AKQ0_9CYAN Thermonuclease family protein OS=Spirulina sp. DLM2.Bin59 OX=2480215 GN=EA366_14930 PE=4 SV=1	45.5134	7227500
493	E.QAGVQVSFY.G		499.758	2	998.508	998.494	14	394	103.68	>tr|A0A6P2AIW5|A0A6P2AIW5_9CYAN Photosystem II CP47 reaction center protein OS=Spirulina sp. DLM2.Bin59 OX=2480215 GN=psbB PE=3 SV=1	29.4312	7222100
494	R.QAGQP.T		500.261	1	500.261	500.246	29.7	183	100.24	>tr|A0A6P2AM50|A0A6P2AM50_9CYAN HAMP domain-containing protein OS=Spirulina sp. DLM2.Bin59 OX=2480215 GN=EA366_12590 PE=4 SV=1	29.4312	7222100
495	V.TYPTR.V		319.168	2	637.329	637.33	-1.8	390	165.5	>tr|A0A6P2AUK9|A0A6P2AUK9_9CYAN Insulinase family protein OS=Spirulina sp. DLM2.Bin59 OX=2480215 GN=EA366_07450 PE=3 SV=1	15.5657	7210900
496	I.VIAHKTV.P		384.243	2	767.478	767.477	1.2	852	135.82	>tr|A0A6P2AYP0|A0A6P2AYP0_9CYAN Type III-B CRISPR-associated protein Cas10/Cmr2 OS=Spirulina sp. DLM2.Bin59 OX=2480215 GN=EA366_02935 PE=4 SV=1	21.8076	7188700
497	E.QIPPELL.K		405.236	2	809.465	809.477	-14	866	108.76	>tr|A0A6P2AYP5|A0A6P2AYP5_9CYAN Chaperone protein ClpB OS=Spirulina sp. DLM2.Bin59 OX=2480215 GN=clpB PE=3 SV=1	30.0088	7125200
498	M.FSGLF.Q		570.294	1	570.294	570.292	3.4	101	109.67	>tr|A0A6P2ARS6|A0A6P2ARS6_9CYAN SulP family inorganic anion transporter OS=Spirulina sp. DLM2.Bin59 OX=2480215 GN=EA366_11330 PE=3 SV=1	53.5869	7119500
499	S.SSIPFRDLIA.P		559.817	2	1118.63	1118.62	6.1	194	107.73	>tr|A0A6P2B2V6|A0A6P2B2V6_9CYAN Sulfate transport system permease protein CysT OS=Spirulina sp. DLM2.Bin59 OX=2480215 GN=cysT PE=3 SV=1	48.6103	7118400
500	G.SRVVVGKH.R		441.265	2	881.523	881.532	-9.5	162	128.49	>tr|A0A6P2AMI7|A0A6P2AMI7_9CYAN M42 family peptidase OS=Spirulina sp. DLM2.Bin59 OX=2480215 GN=EA366_15580 PE=3 SV=1	29.0473	7115600
501	T.LLP.G		342.238	1	342.238	342.239	-1.5	394	125.62	>tr|A0A6P2AZJ7|A0A6P2AZJ7_9CYAN Phosphoenolpyruvate synthase OS=Spirulina sp. DLM2.Bin59 OX=2480215 GN=EA366_06245 PE=4 SV=1	26.2757	7103500
502	L.AVDQRYAG.Y		440.221	2	879.434	879.432	2	520	163.03	>tr|A0A6P2AW50|A0A6P2AW50_9CYAN Cadmium-translocating P-type ATPase OS=Spirulina sp. DLM2.Bin59 OX=2480215 GN=cadA PE=3 SV=1	16.1127	6995200
503	V.LSGF.S		423.225	1	423.225	423.224	2.6	176	197.36	>tr|A0A6P2B117|A0A6P2B117_9CYAN ADP,ATP carrier protein OS=Spirulina sp. DLM2.Bin59 OX=2480215 GN=EA366_03600 PE=3 SV=1	34.6	6951500
504	P.QLF.L		407.229	1	407.229	407.229	1.5	206	147.27	>tr|A0A6P2AUX9|A0A6P2AUX9_9CYAN Glycosyltransferase family 9 protein OS=Spirulina sp. DLM2.Bin59 OX=2480215 GN=EA366_08575 PE=4 SV=1	40.2019	6938700
505	L.VHRDVK.P		377.216	2	753.424	753.437	-16.6	257	155.63	>tr|A0A6P2AXK4|A0A6P2AXK4_9CYAN Non-specific serine/threonine protein kinase OS=Spirulina sp. DLM2.Bin59 OX=2480215 GN=EA366_02850 PE=4 SV=1	11.309	6896600
506	A.FSII.A		479.288	1	479.288	479.286	3.4	35	169.63	>tr|A0A6P2AX72|A0A6P2AX72_9CYAN SulP family inorganic anion transporter OS=Spirulina sp. DLM2.Bin59 OX=2480215 GN=EA366_03340 PE=4 SV=1	56.0741	6863500
507	M.ASLQVPDFR.V		516.78	2	1032.55	1032.55	4.9	212	106.69	>tr|A0A6P2AX48|A0A6P2AX48_9CYAN Dihydrolipoamide acetyltransferase component of pyruvate dehydrogenase complex OS=Spirulina sp. DLM2.Bin59 OX=2480215 GN=EA366_07655 PE=3 SV=1	22.7252	6815100
508	R.VSTLP.S		516.316	1	516.316	516.303	26.4	314	101.42	>tr|A0A6P2AHT1|A0A6P2AHT1_9CYAN Type II/IV secretion system protein OS=Spirulina sp. DLM2.Bin59 OX=2480215 GN=EA366_15460 PE=3 SV=1	22.7252	6815100
509	D.RVVPVQ.P		349.222	2	697.436	697.436	0.4	239	110.71	>tr|A0A6P2AX69|A0A6P2AX69_9CYAN dTDP-4-dehydrorhamnose reductase OS=Spirulina sp. DLM2.Bin59 OX=2480215 GN=rfbD PE=3 SV=1	21.74	6814000
510	F.TTLYH.L		317.663	2	634.318	634.319	-2	499	119.5	>tr|A0A6P2AUT9|A0A6P2AUT9_9CYAN Type 2 lantipeptide synthetase LanM OS=Spirulina sp. DLM2.Bin59 OX=2480215 GN=lanM PE=4 SV=1	17.3019	6809600
511	K.QEGEIVQQQ.C		529.759	2	1058.51	1058.51	-0.5	290	191.38	>tr|A0A6P2AQR4|A0A6P2AQR4_9CYAN Uncharacterized protein OS=Spirulina sp. DLM2.Bin59 OX=2480215 GN=EA366_13475 PE=4 SV=1	46.3565	6798700
512	V.LTL.L		346.233	1	346.233	346.234	-1.2	392	164.31	>tr|A0A6P2AZJ7|A0A6P2AZJ7_9CYAN Phosphoenolpyruvate synthase OS=Spirulina sp. DLM2.Bin59 OX=2480215 GN=EA366_06245 PE=4 SV=1	34.9663	6776400
513	I.VPIRHTYQ.T		507.287	2	1013.57	1013.55	13	116	177.39	>tr|A0A6P2AK23|A0A6P2AK23_9CYAN S-layer homology domain-containing protein OS=Spirulina sp. DLM2.Bin59 OX=2480215 GN=EA366_15395 PE=4 SV=1	23.0316	6754000
514	A.TIKQRHHDQMLHPNFP.V		334.009	6	1999.02	1999.01	4.4	63	125.03	>tr|A0A6P2AK22|A0A6P2AK22_9CYAN MBL fold metallo-hydrolase OS=Spirulina sp. DLM2.Bin59 OX=2480215 GN=EA366_16085 PE=4 SV=1	23.1974	6708700
515	K.QPFYG.R		611.295	1	611.295	611.282	20	342	117.85	>tr|A0A6P2AUK6|A0A6P2AUK6_9CYAN Uncharacterized protein (Fragment) OS=Spirulina sp. DLM2.Bin59 OX=2480215 GN=EA366_06580 PE=4 SV=1	20.9604	6663100
516	S.LLL.D		358.27	1	358.27	358.27	-0.5	149	125.53	>tr|A0A6P2AZJ7|A0A6P2AZJ7_9CYAN Phosphoenolpyruvate synthase OS=Spirulina sp. DLM2.Bin59 OX=2480215 GN=EA366_06245 PE=4 SV=1	40.5943	6605100
517	E.REQGIHAGDA.E		527.259	2	1053.51	1053.51	3.3	168	186.87	>tr|A0A6P2AY20|A0A6P2AY20_9CYAN Creatininase family protein OS=Spirulina sp. DLM2.Bin59 OX=2480215 GN=EA366_06455 PE=3 SV=1	16.488	6551400
518	A.QLAPV.Q		527.321	1	527.321	527.319	3.5	216	143.32	>tr|A0A6P2ASH6|A0A6P2ASH6_9CYAN Aspartate carbamoyltransferase OS=Spirulina sp. DLM2.Bin59 OX=2480215 GN=pyrB PE=3 SV=1	16.488	6551400
519	G.QPLSPEDLN.L		506.758	2	1012.51	1012.49	13.7	22	140.58	>tr|A0A6P2AYS6|A0A6P2AYS6_9CYAN Uncharacterized protein (Fragment) OS=Spirulina sp. DLM2.Bin59 OX=2480215 GN=EA366_03560 PE=4 SV=1	18.4336	6526200
520	S.TIIFVTN.W		404.235	2	807.463	807.461	2.2	246	119.53	>tr|A0A6P2B207|A0A6P2B207_9CYAN O-antigen ligase family protein OS=Spirulina sp. DLM2.Bin59 OX=2480215 GN=EA366_01800 PE=4 SV=1	38.4193	6504500
521	L.IALYER.A		382.719	2	764.431	764.43	1.2	426	194.7	>tr|A0A6P2B0E6|A0A6P2B0E6_9CYAN Glucose-6-phosphate isomerase OS=Spirulina sp. DLM2.Bin59 OX=2480215 GN=pgi PE=3 SV=1	29.0144	6465200
522	H.QEC[+57.021]DDKVIS.R	C[+57]	547.244	2	1093.48	1093.48	-1.7	101	107.51	>tr|A0A6P2APY8|A0A6P2APY8_9CYAN Uncharacterized protein OS=Spirulina sp. DLM2.Bin59 OX=2480215 GN=EA366_12290 PE=4 SV=1	13.2976	6400300
523	E.EVKPF.D		619.349	1	619.349	619.345	5.8	72	140.7	>tr|A0A6P2ALS4|A0A6P2ALS4_9CYAN Uncharacterized protein OS=Spirulina sp. DLM2.Bin59 OX=2480215 GN=EA366_13185 PE=4 SV=1	47.7833	6376000
524	Q.KIPTETR.E		422.748	2	844.489	844.489	0.1	19	136.46	>tr|A0A6P2AP17|A0A6P2AP17_9CYAN DUF2283 domain-containing protein OS=Spirulina sp. DLM2.Bin59 OX=2480215 GN=EA366_12395 PE=4 SV=1	14.6807	6361500
525	V.NLWLQ.Q		673.368	1	673.368	673.367	1.9	97	119.65	>tr|A0A6P2AQP2|A0A6P2AQP2_9CYAN Universal stress protein OS=Spirulina sp. DLM2.Bin59 OX=2480215 GN=EA366_10560 PE=3 SV=1	44.2184	6354000
526	R.QEGY.E		496.205	1	496.205	496.204	2.1	39	121.45	>tr|A0A6P2AY40|A0A6P2AY40_9CYAN Carbamoyl-phosphate synthase large chain OS=Spirulina sp. DLM2.Bin59 OX=2480215 GN=carB PE=3 SV=1	26.2094	6349600
527	P.QVATLQ.D		659.376	1	659.376	659.372	5.7	992	171.8	>tr|A0A6P2AS94|A0A6P2AS94_9CYAN EAL domain-containing protein (Fragment) OS=Spirulina sp. DLM2.Bin59 OX=2480215 GN=EA366_10275 PE=4 SV=1	32.851	6335300
528	Q.QVATVGQMQVYP.N		660.835	2	1320.66	1320.66	1	222	115.81	>tr|A0A6P2AV03|A0A6P2AV03_9CYAN Zn-dependent hydrolase (Fragment) OS=Spirulina sp. DLM2.Bin59 OX=2480215 GN=EA366_07510 PE=3 SV=1	32.851	6335300
529	P.QPQESRPRD.W		556.781	2	1112.55	1112.54	9.4	53	153.5	>tr|A0A6P2APR0|A0A6P2APR0_9CYAN SagB/ThcOx family dehydrogenase OS=Spirulina sp. DLM2.Bin59 OX=2480215 GN=EA366_12445 PE=4 SV=1	37.6803	6294500
530	F.QIPVT.T		557.333	1	557.333	557.329	6.1	252	148.12	>tr|A0A6P2AYF6|A0A6P2AYF6_9CYAN Acetolactate synthase OS=Spirulina sp. DLM2.Bin59 OX=2480215 GN=ilvB PE=3 SV=1	37.6803	6294500
531	S.ITVA.P		403.256	1	403.256	403.255	1.9	249	170.45	>tr|A0A6P2AY40|A0A6P2AY40_9CYAN Carbamoyl-phosphate synthase large chain OS=Spirulina sp. DLM2.Bin59 OX=2480215 GN=carB PE=3 SV=1	22.4991	6227400
532	R.KIYHVLPD.S		492.777	2	984.546	984.551	-4.9	24	155.59	>tr|A0A6P2AX09|A0A6P2AX09_9CYAN Uncharacterized protein OS=Spirulina sp. DLM2.Bin59 OX=2480215 GN=EA366_06660 PE=4 SV=1	11.5985	6169300
533	V.VVIQQH.P		362.211	2	723.414	723.415	-0.6	170	233.23	>tr|A0A6P2ASU7|A0A6P2ASU7_9CYAN Uncharacterized protein OS=Spirulina sp. DLM2.Bin59 OX=2480215 GN=EA366_10445 PE=4 SV=1	15.909	6156000
534	L.ALLM[+15.995]H.W	M[+16]	600.318	1	600.318	600.317	1.2	272	199.32	>tr|A0A6P2ASP7|A0A6P2ASP7_9CYAN N-acetylmuramic acid 6-phosphate etherase OS=Spirulina sp. DLM2.Bin59 OX=2480215 GN=murQ PE=3 SV=1	15.8325	6139700
535	P.ELRSQ.L		632.343	1	632.343	632.336	11.2	190	164.16	>tr|A0A6P2AIP1|A0A6P2AIP1_9CYAN Glycosyltransferase family 4 protein OS=Spirulina sp. DLM2.Bin59 OX=2480215 GN=EA366_14745 PE=4 SV=1	41.5312	6125600
536	G.TAYWM.V		336.154	2	671.302	671.286	23.5	402	111.14	>tr|A0A6P2AMB7|A0A6P2AMB7_9CYAN Tetratricopeptide repeat protein (Fragment) OS=Spirulina sp. DLM2.Bin59 OX=2480215 GN=EA366_14640 PE=4 SV=1	20.8107	6007900
537	F.QPFQPQQP.P		485.243	2	969.479	969.479	0.4	57	264.05	>tr|A0A6P2APA7|A0A6P2APA7_9CYAN Glycosyltransferase OS=Spirulina sp. DLM2.Bin59 OX=2480215 GN=EA366_11530 PE=4 SV=1	27.2275	5989000
538	E.TISY.L		483.247	1	483.247	483.245	3.2	672	181.88	>tr|A0A6P2AZ82|A0A6P2AZ82_9CYAN Magnesium chelatase OS=Spirulina sp. DLM2.Bin59 OX=2480215 GN=EA366_04130 PE=3 SV=1	27.2275	5989000
539	G.TVQVMG.V		317.665	2	634.322	634.323	-1.1	189	108.46	>tr|A0A6P2ATL3|A0A6P2ATL3_9CYAN Filamentous hemagglutinin N-terminal domain-containing protein (Fragment) OS=Spirulina sp. DLM2.Bin59 OX=2480215 GN=EA366_08710 PE=4 SV=1	13.6792	5971100
540	Q.QLPFQ.V		632.341	1	632.341	632.34	0.5	109	221.23	>tr|A0A6P2AW75|A0A6P2AW75_9CYAN Aspartate--tRNA(Asp/Asn) ligase OS=Spirulina sp. DLM2.Bin59 OX=2480215 GN=aspS PE=3 SV=1	37.6509	5899700
541	D.TAAPQWHGP.G		482.737	2	964.467	964.463	3.6	564	137.96	>tr|A0A6P2AR72|A0A6P2AR72_9CYAN Malto-oligosyltrehalose trehalohydrolase OS=Spirulina sp. DLM2.Bin59 OX=2480215 GN=treZ PE=3 SV=1	22.386	5896100
542	L.TVPPEVM[+15.995]IQ.T	M[+16]	515.275	2	1029.54	1029.53	14.2	300	122.71	>tr|A0A6P2AZX3|A0A6P2AZX3_9CYAN ArsR family transcriptional regulator OS=Spirulina sp. DLM2.Bin59 OX=2480215 GN=EA366_02825 PE=4 SV=1	31.7595	5886700
543	Y.VYAP.D		449.24	1	449.24	449.24	1	502	182.94	>tr|A0A6P2AXI3|A0A6P2AXI3_9CYAN CelD_N domain-containing protein OS=Spirulina sp. DLM2.Bin59 OX=2480215 GN=EA366_01805 PE=4 SV=1	21.6715	5763600
544	D.IHEMAYV.G		431.707	2	862.407	862.413	-6.5	111	104.98	>tr|A0A6P2AZF0|A0A6P2AZF0_9CYAN TIGR03032 family protein (Fragment) OS=Spirulina sp. DLM2.Bin59 OX=2480215 GN=EA366_01660 PE=4 SV=1	16.1113	5753400
545	L.LDR.Q		403.231	1	403.231	403.23	2.4	151	145.49	>tr|A0A6P2AZJ7|A0A6P2AZJ7_9CYAN Phosphoenolpyruvate synthase OS=Spirulina sp. DLM2.Bin59 OX=2480215 GN=EA366_06245 PE=4 SV=1	31.3594	5742200
546	Y.HLY.D		432.225	1	432.225	432.224	1.4	150	187.31	>tr|A0A6P2AM50|A0A6P2AM50_9CYAN HAMP domain-containing protein OS=Spirulina sp. DLM2.Bin59 OX=2480215 GN=EA366_12590 PE=4 SV=1	16.1988	5727200
547	L.FSQRSH.N		381.188	2	761.369	761.369	0	158	109.43	>tr|A0A6P2AJB7|A0A6P2AJB7_9CYAN Uncharacterized protein OS=Spirulina sp. DLM2.Bin59 OX=2480215 GN=EA366_14515 PE=4 SV=1	16.2954	5673400
548	Q.IPFPQ.I		601.335	1	601.335	601.334	1.3	318	201.15	>tr|A0A6P2AUT9|A0A6P2AUT9_9CYAN Type 2 lantipeptide synthetase LanM OS=Spirulina sp. DLM2.Bin59 OX=2480215 GN=lanM PE=4 SV=1	40.7338	5589000
549	T.QQGIVVENL.K		500.279	2	999.551	999.547	3.9	677	170.35	>tr|A0A6P2ANT8|A0A6P2ANT8_9CYAN DEAD/DEAH box helicase (Fragment) OS=Spirulina sp. DLM2.Bin59 OX=2480215 GN=EA366_14625 PE=4 SV=1	27.7865	5578300
550	Q.LSGVVLTK.L		408.764	2	816.52	816.519	1.2	432	106.74	>tr|A0A6P2AVV6|A0A6P2AVV6_9CYAN Signal recognition particle receptor FtsY OS=Spirulina sp. DLM2.Bin59 OX=2480215 GN=ftsY PE=3 SV=1	32.7523	5540000
551	V.KEKIDR.I		394.735	2	788.463	788.462	0.1	129	145.78	>tr|A0A6P2AUX3|A0A6P2AUX3_9CYAN Uncharacterized protein OS=Spirulina sp. DLM2.Bin59 OX=2480215 GN=EA366_07245 PE=4 SV=1	12.8326	5482100
552	E.IYGFYLTELD.V		617.304	2	1233.6	1233.6	-2.6	478	104.18	>tr|A0A6P2AK88|A0A6P2AK88_9CYAN Phosphoenolpyruvate carboxylase OS=Spirulina sp. DLM2.Bin59 OX=2480215 GN=ppc PE=3 SV=1	49.4634	5463800
553	I.WQFPQ.G		705.336	1	705.336	705.336	0.4	193	174.13	>tr|A0A6P2AUC5|A0A6P2AUC5_9CYAN Geranylgeranyl reductase family protein (Fragment) OS=Spirulina sp. DLM2.Bin59 OX=2480215 GN=EA366_11315 PE=4 SV=1	47.8453	5446500
554	A.SLAGANLR.D		401.228	2	801.448	801.458	-11.6	462	156.31	>tr|A0A6P2ATB9|A0A6P2ATB9_9CYAN Serine/threonine-protein kinase B OS=Spirulina sp. DLM2.Bin59 OX=2480215 GN=EA366_10145 PE=3 SV=1	16.2406	5418900
555	F.PYEERR.L		425.215	2	849.423	849.421	2.3	19	125.88	>tr|A0A6P2AXS3|A0A6P2AXS3_9CYAN Crp/Fnr family transcriptional regulator OS=Spirulina sp. DLM2.Bin59 OX=2480215 GN=EA366_01385 PE=4 SV=1	16.3164	5398500
556	L.PAVP.M		383.229	1	383.229	383.229	-0.4	618	156.39	>tr|A0A6P2ATM4|A0A6P2ATM4_9CYAN CHAT domain-containing protein (Fragment) OS=Spirulina sp. DLM2.Bin59 OX=2480215 GN=EA366_11740 PE=4 SV=1	27.2428	5313400
557	I.PLVVQQ.F		342.208	2	683.409	683.409	1	106	134.79	>tr|A0A6P2AKI7|A0A6P2AKI7_9CYAN LysR family transcriptional regulator OS=Spirulina sp. DLM2.Bin59 OX=2480215 GN=EA366_13860 PE=3 SV=1	28.6794	5254700
558	Q.ILPKAARD.E		442.271	2	883.535	883.536	-0.7	179	207.98	>tr|A0A6P2AZK9|A0A6P2AZK9_9CYAN 33 kDa chaperonin OS=Spirulina sp. DLM2.Bin59 OX=2480215 GN=hslO PE=3 SV=1	15.0003	5217800
559	D.RRFYLVQ.E		491.29	2	981.572	981.563	9.6	87	128.64	>tr|A0A6P2AY37|A0A6P2AY37_9CYAN Serine/threonine protein kinase OS=Spirulina sp. DLM2.Bin59 OX=2480215 GN=EA366_00105 PE=4 SV=1	34.8999	5208000
560	S.QLQQLFP.N		873.482	1	873.482	873.483	-1.3	267	194.08	>tr|A0A6P2AUP0|A0A6P2AUP0_9CYAN MBL fold metallo-hydrolase OS=Spirulina sp. DLM2.Bin59 OX=2480215 GN=EA366_06755 PE=4 SV=1	48.0583	5199200
561	L.TKF.Y		395.229	1	395.229	395.229	-0.4	597	156.1	>tr|A0A6P2AM50|A0A6P2AM50_9CYAN HAMP domain-containing protein OS=Spirulina sp. DLM2.Bin59 OX=2480215 GN=EA366_12590 PE=4 SV=1	13.4238	5142100
562	P.VHLY.E		531.296	1	531.296	531.293	6.5	216	209.21	>tr|A0A6P2ARE5|A0A6P2ARE5_9CYAN RNA polymerase sigma factor SigA OS=Spirulina sp. DLM2.Bin59 OX=2480215 GN=rpoD PE=3 SV=1	25.6686	5122400
563	L.IFTHTL.G		366.209	2	731.41	731.409	1.8	97	159.23	>tr|A0A6P2B015|A0A6P2B015_9CYAN Apolipoprotein N-acyltransferase (Fragment) OS=Spirulina sp. DLM2.Bin59 OX=2480215 GN=EA366_01295 PE=3 SV=1	34.5562	5117500
564	G.LLPDAH.V		333.184	2	665.361	665.362	-1.3	269	198.21	>tr|A0A6P2AMN2|A0A6P2AMN2_9CYAN NAD(P)H-quinone oxidoreductase chain 4 OS=Spirulina sp. DLM2.Bin59 OX=2480215 GN=ndhD PE=3 SV=1	20.6649	5068500
565	S.HIFDTGGI.L		430.218	2	859.428	859.431	-3.2	50	127.47	>tr|A0A6P2ALY3|A0A6P2ALY3_9CYAN Uncharacterized protein OS=Spirulina sp. DLM2.Bin59 OX=2480215 GN=EA366_13090 PE=4 SV=1	17.4345	5034700
566	H.ELEPERRGP.Y		541.785	2	1082.56	1082.56	4.5	426	145.8	>tr|A0A6P2AV52|A0A6P2AV52_9CYAN Anthranilate synthase component 1 OS=Spirulina sp. DLM2.Bin59 OX=2480215 GN=trpE PE=3 SV=1	16.7466	5020800
567	G.VPF.F		362.208	1	362.208	362.207	1.2	220	173.9	>tr|A0A6P2B2T6|A0A6P2B2T6_9CYAN ATP-dependent zinc metalloprotease FtsH OS=Spirulina sp. DLM2.Bin59 OX=2480215 GN=ftsH PE=3 SV=1	34.6991	4990900
568	R.TPRNY.F		325.666	2	650.324	650.326	-2.2	270	146.58	>tr|A0A6P2AZ46|A0A6P2AZ46_9CYAN DUF4336 domain-containing protein OS=Spirulina sp. DLM2.Bin59 OX=2480215 GN=EA366_02940 PE=4 SV=1	11.7953	4901900
569	S.QAGQQQGQRS.S		544.266	2	1087.52	1087.52	0.5	30	100.91	>tr|A0A6P2AJP4|A0A6P2AJP4_9CYAN Zinc ribbon domain-containing protein OS=Spirulina sp. DLM2.Bin59 OX=2480215 GN=EA366_15085 PE=4 SV=1	27.3676	4889000
570	A.VVELR.R		308.195	2	615.382	615.382	-1.2	201	198.41	>tr|A0A6P2AR25|A0A6P2AR25_9CYAN Efflux RND transporter periplasmic adaptor subunit OS=Spirulina sp. DLM2.Bin59 OX=2480215 GN=EA366_13290 PE=3 SV=1	18.2923	4819100
571	D.ILQLL.L		599.414	1	599.414	599.413	1.6	466	110.29	>tr|A0A6P2AS64|A0A6P2AS64_9CYAN DNA helicase (Fragment) OS=Spirulina sp. DLM2.Bin59 OX=2480215 GN=EA366_10340 PE=4 SV=1	58.0862	4723100
572	Y.FQYR.D		307.165	2	613.323	613.309	22	144	104.54	>tr|A0A6P2AXC8|A0A6P2AXC8_9CYAN Prepilin peptidase (Fragment) OS=Spirulina sp. DLM2.Bin59 OX=2480215 GN=EA366_05380 PE=4 SV=1	22.9865	4663500
573	I.VFLG.K		435.261	1	435.261	435.26	2.4	436	147.85	>tr|A0A6P2AS54|A0A6P2AS54_9CYAN ATP-binding cassette domain-containing protein OS=Spirulina sp. DLM2.Bin59 OX=2480215 GN=EA366_11130 PE=4 SV=1	36.5607	4649700
574	G.ITLSDDSAPLV.A		565.801	2	1130.59	1130.59	0.3	189	141.64	>tr|A0A6P2AV11|A0A6P2AV11_9CYAN DUF1565 domain-containing protein OS=Spirulina sp. DLM2.Bin59 OX=2480215 GN=EA366_06250 PE=4 SV=1	50.0812	4635000
575	G.IQIPFPQ.R		421.748	2	842.49	842.477	14.9	275	107.18	>tr|A0A6P2AZK1|A0A6P2AZK1_9CYAN Mechanosensitive ion channel family protein OS=Spirulina sp. DLM2.Bin59 OX=2480215 GN=EA366_03510 PE=3 SV=1	36.3925	4630600
576	G.LSALLTQP.P		421.759	2	842.51	842.498	14.4	86	157.37	>tr|A0A6P2AN76|A0A6P2AN76_9CYAN 5'-nucleotidase SurE OS=Spirulina sp. DLM2.Bin59 OX=2480215 GN=surE PE=3 SV=1	30.7148	4625100
577	S.LC[+57.021]PTPSGL.R	C[+57]	422.721	2	844.434	844.423	12.8	35	133.23	>tr|A0A6P2AMZ3|A0A6P2AMZ3_9CYAN Alpha amylase OS=Spirulina sp. DLM2.Bin59 OX=2480215 GN=EA366_12100 PE=4 SV=1	30.7148	4625100
578	R.SFFPH.D		317.652	2	634.297	634.298	-2.7	77	108.93	>tr|A0A6P2B1C4|A0A6P2B1C4_9CYAN Pyruvate phosphate dikinase PEP/pyruvate-binding protein OS=Spirulina sp. DLM2.Bin59 OX=2480215 GN=EA366_03000 PE=4 SV=1	12.9413	4595400
579	Q.ELEAIAQ.E		387.201	2	773.395	773.404	-11.4	769	118.95	>tr|A0A6P2AV21|A0A6P2AV21_9CYAN Aminopeptidase N OS=Spirulina sp. DLM2.Bin59 OX=2480215 GN=EA366_06185 PE=3 SV=1	25.119	4595300
580	T.ITLQSQP.G		786.42	1	786.42	786.436	-19.3	264	102.55	>tr|A0A6P2AVV9|A0A6P2AVV9_9CYAN Hybrid sensor histidine kinase/response regulator (Fragment) OS=Spirulina sp. DLM2.Bin59 OX=2480215 GN=EA366_10260 PE=4 SV=1	51.6048	4571800
581	T.PVPLTYP.T		786.453	1	786.453	786.44	17.3	9	100.56	>tr|A0A6P2AT89|A0A6P2AT89_9CYAN 4-hydroxy-3-methylbut-2-en-1-yl diphosphate synthase (ferredoxin) OS=Spirulina sp. DLM2.Bin59 OX=2480215 GN=ispG PE=3 SV=1	51.6048	4571800
582	S.LLLGTISLVGV.A		542.842	2	1084.68	1084.7	-19.4	6	107.77	>tr|A0A6P2AX39|A0A6P2AX39_9CYAN Uncharacterized protein OS=Spirulina sp. DLM2.Bin59 OX=2480215 GN=EA366_03525 PE=4 SV=1	56.4669	4507500
583	T.LNQADLAG.A		401.208	2	801.41	801.41	-0.6	262	106	>tr|A0A6P2B0Q8|A0A6P2B0Q8_9CYAN Uncharacterized protein OS=Spirulina sp. DLM2.Bin59 OX=2480215 GN=EA366_04200 PE=4 SV=1	10.8307	4465700
584	T.TVTTLPA.P		351.711	2	702.415	702.403	16.2	35	141.8	>tr|A0A6P2AYH9|A0A6P2AYH9_9CYAN ShlB/FhaC/HecB family hemolysin secretion/activation protein OS=Spirulina sp. DLM2.Bin59 OX=2480215 GN=EA366_05580 PE=4 SV=1	23.462	4459300
585	G.VM[+15.995]QGGRLE.Q	M[+16]	453.23	2	905.452	905.451	1.3	214	112	>tr|A0A6P2AK63|A0A6P2AK63_9CYAN ABC transporter ATP-binding protein OS=Spirulina sp. DLM2.Bin59 OX=2480215 GN=EA366_15980 PE=4 SV=1	14.7176	4440200
586	K.VTDQPHLTVY.V		586.809	2	1172.61	1172.59	13	338	141.5	>tr|A0A6P2ASZ0|A0A6P2ASZ0_9CYAN Glucosylglycerol 3-phosphatase OS=Spirulina sp. DLM2.Bin59 OX=2480215 GN=stpA PE=4 SV=1	23.3284	4400400
587	Q.IYL.L		408.251	1	408.251	408.249	3.8	296	148.69	>tr|A0A6P2AZJ7|A0A6P2AZJ7_9CYAN Phosphoenolpyruvate synthase OS=Spirulina sp. DLM2.Bin59 OX=2480215 GN=EA366_06245 PE=4 SV=1	40.7065	4376100
588	A.LYGFGLF.L		408.716	2	816.424	816.429	-6.5	86	145.52	>tr|A0A6P2AZ45|A0A6P2AZ45_9CYAN Uncharacterized protein OS=Spirulina sp. DLM2.Bin59 OX=2480215 GN=EA366_01615 PE=4 SV=1	40.7065	4376100
589	K.QVIYFENL.T		513.274	2	1025.54	1025.53	11.3	323	105.67	>tr|A0A6P2AN98|A0A6P2AN98_9CYAN Mechanosensitive ion channel protein MscS OS=Spirulina sp. DLM2.Bin59 OX=2480215 GN=EA366_12040 PE=3 SV=1	26.3553	4354800
590	W.KDGVIT.P		632.364	1	632.364	632.361	4.3	67	142.74	>tr|A0A6P2AYK3|A0A6P2AYK3_9CYAN Uma2 family endonuclease (Fragment) OS=Spirulina sp. DLM2.Bin59 OX=2480215 GN=EA366_01890 PE=4 SV=1	23.4214	4345500
591	G.TVGF.E		423.225	1	423.225	423.224	2.5	78	128.43	>tr|A0A6P2AHZ5|A0A6P2AHZ5_9CYAN Dihydrolipoyl dehydrogenase OS=Spirulina sp. DLM2.Bin59 OX=2480215 GN=lpdA PE=3 SV=1	20.8736	4340200
592	V.LGVSW.E		561.306	1	561.306	561.303	5	281	147.54	>tr|A0A6P2ASU9|A0A6P2ASU9_9CYAN RNA helicase (Fragment) OS=Spirulina sp. DLM2.Bin59 OX=2480215 GN=EA366_08975 PE=4 SV=1	49.3094	4331500
593	D.TFPHLR.P		385.715	2	770.423	770.431	-9.7	302	123.53	>tr|A0A6P2AK88|A0A6P2AK88_9CYAN Phosphoenolpyruvate carboxylase OS=Spirulina sp. DLM2.Bin59 OX=2480215 GN=ppc PE=3 SV=1	22.4209	4326300
594	V.SPESRV.R		337.677	2	674.346	674.347	-1.3	112	112.56	>tr|A0A6P2AJ94|A0A6P2AJ94_9CYAN Uma2 family endonuclease OS=Spirulina sp. DLM2.Bin59 OX=2480215 GN=EA366_15940 PE=4 SV=1	11.1904	4323600
595	I.EQSAAIFKA.L		482.762	2	964.516	964.51	6.8	653	157.34	>tr|A0A6P2AUQ9|A0A6P2AUQ9_9CYAN Adenylate/guanylate cyclase domain-containing protein OS=Spirulina sp. DLM2.Bin59 OX=2480215 GN=EA366_07850 PE=4 SV=1	25.4039	4318400
596	L.KAGVPL.G		584.378	1	584.378	584.377	2	103	132.25	>tr|A0A6P2APJ8|A0A6P2APJ8_9CYAN Permease OS=Spirulina sp. DLM2.Bin59 OX=2480215 GN=EA366_11350 PE=3 SV=1	19.7093	4290600
597	E.YDEVMNNQR.R		584.758	2	1168.51	1168.51	3.8	746	112.39	>tr|A0A6P2AZ02|A0A6P2AZ02_9CYAN Protein translocase subunit SecA OS=Spirulina sp. DLM2.Bin59 OX=2480215 GN=secA PE=3 SV=1	19.7093	4290600
598	N.PIAANPVPP.N		438.247	2	875.486	875.499	-14	280	130.17	>tr|A0A6P2AS45|A0A6P2AS45_9CYAN GHL10 domain-containing protein (Fragment) OS=Spirulina sp. DLM2.Bin59 OX=2480215 GN=EA366_11075 PE=4 SV=1	33.4549	4289200
599	Q.QGATYHVEA.F		488.232	2	975.456	975.453	3.1	562	140.16	>tr|A0A6P2AR86|A0A6P2AR86_9CYAN Porin OS=Spirulina sp. DLM2.Bin59 OX=2480215 GN=EA366_10190 PE=3 SV=1	26.3051	4284800
600	L.AVAQQLNLP.I		477.278	2	953.548	953.542	6.7	451	118.04	>tr|A0A6P2AVV6|A0A6P2AVV6_9CYAN Signal recognition particle receptor FtsY OS=Spirulina sp. DLM2.Bin59 OX=2480215 GN=ftsY PE=3 SV=1	33.1183	4282700
601	T.QVTF.G		494.263	1	494.263	494.261	4.9	157	186.48	>tr|A0A6P2B2T6|A0A6P2B2T6_9CYAN ATP-dependent zinc metalloprotease FtsH OS=Spirulina sp. DLM2.Bin59 OX=2480215 GN=ftsH PE=3 SV=1	33.6321	4247100
602	P.ISQF.L		494.262	1	494.262	494.261	2.8	1166	173.2	>tr|A0A6P2ANI6|A0A6P2ANI6_9CYAN BON domain-containing protein OS=Spirulina sp. DLM2.Bin59 OX=2480215 GN=EA366_12105 PE=4 SV=1	33.4614	4247100
603	L.TPSPQ.R		529.26	1	529.26	529.262	-2.5	68	139.56	>tr|A0A6P2AX75|A0A6P2AX75_9CYAN 23S rRNA (Uracil(1939)-C(5))-methyltransferase RlmD OS=Spirulina sp. DLM2.Bin59 OX=2480215 GN=rlmD PE=3 SV=1	31.9613	4221600
604	N.QLPELHDL.L		482.76	2	964.513	964.51	3.6	64	188.91	>tr|A0A6P2AXL0|A0A6P2AXL0_9CYAN M48 family peptidase OS=Spirulina sp. DLM2.Bin59 OX=2480215 GN=EA366_07045 PE=3 SV=1	32.1493	4218800
605	T.IGALX.X		483.296	1	483.296	483.295	2.7	28	136.49	>sp|P81000|GVPC_SPICC Gas vesicle protein C (Fragment) OS=Spirulina sp. (strain CCAP 1475/10) OX=69016 GN=gvpC PE=1 SV=1	32.1493	4218800
606	G.LGAL.L		373.245	1	373.245	373.245	0	52	119.5	>tr|A0A6P2AY04|A0A6P2AY04_9CYAN Helicase (Fragment) OS=Spirulina sp. DLM2.Bin59 OX=2480215 GN=EA366_03670 PE=4 SV=1	34.4267	4212700
607	G.QPYRLVGT.I		467.264	2	933.521	933.515	6.6	686	171.08	>tr|A0A6P2AW48|A0A6P2AW48_9CYAN PAS domain-containing hybrid sensor histidine kinase/response regulator OS=Spirulina sp. DLM2.Bin59 OX=2480215 GN=EA366_08980 PE=4 SV=1	36.4298	4205000
608	D.LTPQEFS.L		411.213	2	821.418	821.404	17.3	166	164.27	>tr|A0A6P2AWU9|A0A6P2AWU9_9CYAN DNA-binding response regulator OS=Spirulina sp. DLM2.Bin59 OX=2480215 GN=EA366_05970 PE=4 SV=1	24.9434	4176100
609	A.LLM[+15.995].F	M[+16]	392.221	1	392.221	392.221	-0.5	448	173.6	>tr|A0A6P2AV51|A0A6P2AV51_9CYAN DUF3536 domain-containing protein OS=Spirulina sp. DLM2.Bin59 OX=2480215 GN=EA366_09155 PE=4 SV=1	16.7796	4170800
610	Q.TAVPYLH.S		400.717	2	800.427	800.43	-4.3	164	119.76	>tr|A0A6P2AVL3|A0A6P2AVL3_9CYAN CinA-like protein OS=Spirulina sp. DLM2.Bin59 OX=2480215 GN=EA366_06725 PE=3 SV=1	16.6977	4131600
611	V.THPC[+57.021]FYG.L	C[+57]	441.185	2	881.362	881.361	1	414	138.35	>tr|A0A6P2AI27|A0A6P2AI27_9CYAN Amidophosphoribosyltransferase OS=Spirulina sp. DLM2.Bin59 OX=2480215 GN=purF PE=3 SV=1	16.6823	4122100
612	Q.THW.F		443.204	1	443.204	443.204	1.6	426	121.13	>tr|A0A6P2AS94|A0A6P2AS94_9CYAN EAL domain-containing protein (Fragment) OS=Spirulina sp. DLM2.Bin59 OX=2480215 GN=EA366_10275 PE=4 SV=1	16.6823	4122100
613	Q.LTPYHE.K		380.192	2	759.377	759.367	12.9	535	100.38	>tr|A0A6P2AZ82|A0A6P2AZ82_9CYAN Magnesium chelatase OS=Spirulina sp. DLM2.Bin59 OX=2480215 GN=EA366_04130 PE=3 SV=1	13.3699	4093800
614	P.SLTTFTH.R		403.714	2	806.42	806.404	19.2	575	132.8	>tr|A0A6P2AT48|A0A6P2AT48_9CYAN Single-stranded-DNA-specific exonuclease RecJ OS=Spirulina sp. DLM2.Bin59 OX=2480215 GN=recJ PE=3 SV=1	18.587	4045300
615	I.AATSARQ.I		704.367	1	704.367	704.369	-2.3	234	147.42	>tr|A0A6P2ALE0|A0A6P2ALE0_9CYAN MCE family protein (Fragment) OS=Spirulina sp. DLM2.Bin59 OX=2480215 GN=EA366_14470 PE=4 SV=1	27.8132	4015500
616	V.TAAHNR.V		335.171	2	669.335	669.343	-11.5	130	114.16	>tr|A0A6P2AVD6|A0A6P2AVD6_9CYAN Ferredoxin OS=Spirulina sp. DLM2.Bin59 OX=2480215 GN=EA366_08255 PE=4 SV=1	20.3994	3998300
617	C.IFQASNP.H		388.706	2	776.405	776.394	14.6	96	164.15	>tr|A0A6P2AWD0|A0A6P2AWD0_9CYAN Uncharacterized protein OS=Spirulina sp. DLM2.Bin59 OX=2480215 GN=EA366_07665 PE=4 SV=1	20.8572	3982100
618	W.TVAV.N		389.239	1	389.239	389.24	-0.5	458	112.76	>tr|A0A6P2AJR1|A0A6P2AJR1_9CYAN DUF1574 domain-containing protein OS=Spirulina sp. DLM2.Bin59 OX=2480215 GN=EA366_15565 PE=4 SV=1	20.8572	3982100
619	L.FHFLYWL.C		513.265	2	1025.52	1025.52	-1.8	89	129.18	>tr|A0A6P2AKU1|A0A6P2AKU1_9CYAN Type I site-specific deoxyribonuclease OS=Spirulina sp. DLM2.Bin59 OX=2480215 GN=EA366_14665 PE=3 SV=1	38.1069	3952700
620	S.PLLDLAGF.F		423.244	2	845.481	845.477	4.7	73	147.41	>tr|A0A6P2AXG9|A0A6P2AXG9_9CYAN Restriction endonuclease subunit R OS=Spirulina sp. DLM2.Bin59 OX=2480215 GN=EA366_01865 PE=4 SV=1	36.9894	3942500
621	H.QVVAH.V		553.312	1	553.312	553.309	4.2	46	162.86	>tr|A0A6P2ATG1|A0A6P2ATG1_9CYAN Glyoxalase OS=Spirulina sp. DLM2.Bin59 OX=2480215 GN=EA366_11125 PE=4 SV=1	16.3966	3913400
622	P.TLYAYFESD.N		554.743	2	1108.48	1108.48	-4.7	79	137.82	>tr|A0A6P2AW29|A0A6P2AW29_9CYAN Non-specific serine/threonine protein kinase (Fragment) OS=Spirulina sp. DLM2.Bin59 OX=2480215 GN=EA366_04225 PE=4 SV=1	16.3966	3913400
623	F.QAGPVRNY.D		452.731	2	904.456	904.463	-8.6	368	150.21	>tr|A0A6P2AK86|A0A6P2AK86_9CYAN Glutamate-1-semialdehyde 2,1-aminomutase OS=Spirulina sp. DLM2.Bin59 OX=2480215 GN=hemL PE=3 SV=1	26.5115	3908200
624	G.LMLFHL.A		387.22	2	773.433	773.438	-5.7	28	135.24	>tr|A0A6P2AR74|A0A6P2AR74_9CYAN Cyanoexosortase A OS=Spirulina sp. DLM2.Bin59 OX=2480215 GN=crtA PE=4 SV=1	26.0295	3899300
625	G.M[+15.995]TSIAH.D	M[+16]	338.163	2	675.319	675.313	8.9	193	271.91	>tr|A0A6P2AVM9|A0A6P2AVM9_9CYAN ABC transporter permease OS=Spirulina sp. DLM2.Bin59 OX=2480215 GN=EA366_07955 PE=3 SV=1	12.1098	3892900
626	G.SLRELVGNAA.A		515.292	2	1029.58	1029.57	7.6	490	153.67	>tr|A0A6P2AXZ0|A0A6P2AXZ0_9CYAN CHAT domain-containing protein OS=Spirulina sp. DLM2.Bin59 OX=2480215 GN=EA366_06550 PE=4 SV=1	54.961	3715700
627	H.LGGLPWPYR.E		529.799	2	1058.59	1058.58	11.9	198	265.52	>tr|A0A6P2AZ71|A0A6P2AZ71_9CYAN Protein-methionine-sulfoxide reductase catalytic subunit MsrP OS=Spirulina sp. DLM2.Bin59 OX=2480215 GN=msrP PE=4 SV=1	25.387	3702000
628	N.YREAY.A		351.166	2	701.325	701.325	-0.7	656	208	>tr|A0A6P2ARR8|A0A6P2ARR8_9CYAN Phosphoenolpyruvate synthase (Fragment) OS=Spirulina sp. DLM2.Bin59 OX=2480215 GN=EA366_09770 PE=3 SV=1	17.9818	3696100
629	S.RTVPF.V		310.181	2	619.355	619.356	-1.8	855	123.47	>tr|A0A6P2AY40|A0A6P2AY40_9CYAN Carbamoyl-phosphate synthase large chain OS=Spirulina sp. DLM2.Bin59 OX=2480215 GN=carB PE=3 SV=1	31.0055	3529400
630	E.ITHQFAIY.D		496.759	2	992.51	992.52	-10.4	125	129.18	>tr|A0A6P2AS80|A0A6P2AS80_9CYAN UPF0102 protein EA366_11335 OS=Spirulina sp. DLM2.Bin59 OX=2480215 GN=EA366_11335 PE=3 SV=1	32.3782	3473000
631	G.VEYQR.D		347.679	2	694.35	694.352	-2.2	380	160.03	>tr|A0A6P2AJJ5|A0A6P2AJJ5_9CYAN Response regulator (Fragment) OS=Spirulina sp. DLM2.Bin59 OX=2480215 GN=EA366_15745 PE=4 SV=1	14.107	3469200
632	A.QGAIPAGLML.V		485.773	2	970.539	970.539	0.3	101	233.11	>tr|A0A6P2ANF2|A0A6P2ANF2_9CYAN Cytochrome b6-f complex subunit 4 OS=Spirulina sp. DLM2.Bin59 OX=2480215 GN=petD PE=3 SV=1	49.9398	3441200
633	G.QLQIDDFPI.I		544.793	2	1088.58	1088.56	15.1	1328	130.07	>tr|A0A6P2AYU0|A0A6P2AYU0_9CYAN Uncharacterized protein OS=Spirulina sp. DLM2.Bin59 OX=2480215 GN=EA366_04890 PE=4 SV=1	48.1566	3411700
634	D.QQGLFSM.A		810.377	1	810.377	810.381	-6	238	138.37	>tr|A0A6P2ALI1|A0A6P2ALI1_9CYAN DUF11 domain-containing protein OS=Spirulina sp. DLM2.Bin59 OX=2480215 GN=EA366_14370 PE=4 SV=1	52.1797	3370100
635	L.QRHHHQQ.L		485.743	2	970.478	970.471	7.2	885	121.92	>tr|A0A6P2AVW4|A0A6P2AVW4_9CYAN DEAD/DEAH box helicase OS=Spirulina sp. DLM2.Bin59 OX=2480215 GN=EA366_05910 PE=4 SV=1	31.9599	3370000
636	L.FDYFDSLL.V		510.238	2	1019.47	1019.47	-3.3	468	102.26	>tr|A0A6P2AKU1|A0A6P2AKU1_9CYAN Type I site-specific deoxyribonuclease OS=Spirulina sp. DLM2.Bin59 OX=2480215 GN=EA366_14665 PE=3 SV=1	48.6377	3313700
637	K.NFDPR.H		324.658	2	648.309	648.31	-1.3	298	110.25	>tr|A0A6P2AXW7|A0A6P2AXW7_9CYAN Fructose-1,6-bisphosphate aldolase OS=Spirulina sp. DLM2.Bin59 OX=2480215 GN=fba PE=3 SV=1	18.2568	3243100
638	L.PVLHLPQ.L		402.242	2	803.476	803.477	-1.1	264	112.74	>tr|A0A6P2ASR6|A0A6P2ASR6_9CYAN Heterodisulfide reductase OS=Spirulina sp. DLM2.Bin59 OX=2480215 GN=EA366_09620 PE=4 SV=1	36.3094	3238800
639	I.LPGLKARG.F		406.256	2	811.505	811.515	-12.3	115	104.04	>tr|A0A6P2AXB8|A0A6P2AXB8_9CYAN DUF5615 domain-containing protein OS=Spirulina sp. DLM2.Bin59 OX=2480215 GN=EA366_05040 PE=4 SV=1	35.6091	3204700
640	S.FGERY.L		336.162	2	671.316	671.315	1.6	298	168.49	>tr|A0A6P2AS72|A0A6P2AS72_9CYAN Cysteine synthase OS=Spirulina sp. DLM2.Bin59 OX=2480215 GN=cysK PE=3 SV=1	20.4359	3130900
641	G.VYTP.T		479.235	1	479.235	479.25	-31.2	235	143.48	>tr|A0A6P2AUK6|A0A6P2AUK6_9CYAN Uncharacterized protein (Fragment) OS=Spirulina sp. DLM2.Bin59 OX=2480215 GN=EA366_06580 PE=4 SV=1	22.9998	3111900
642	R.AHASTEGVTK.Y		500.757	2	1000.51	1000.51	1.8	156	418.11	>tr|A0A6P2AWI8|A0A6P2AWI8_9CYAN Phosphoglycerate kinase OS=Spirulina sp. DLM2.Bin59 OX=2480215 GN=pgk PE=3 SV=1	10.2504	3110500
643	Y.LLSVF.C		578.356	1	578.356	578.355	2.2	25	179.01	>tr|A0A6P2AYL1|A0A6P2AYL1_9CYAN Histidine kinase domain-containing protein OS=Spirulina sp. DLM2.Bin59 OX=2480215 GN=EA366_00710 PE=4 SV=1	56.8952	3102000
644	G.EIDAFVTY.F		479.228	2	957.449	957.456	-7.9	279	135.83	>tr|A0A6P2ATX3|A0A6P2ATX3_9CYAN Glycerate kinase OS=Spirulina sp. DLM2.Bin59 OX=2480215 GN=EA366_08900 PE=4 SV=1	21.7663	3099300
645	G.PGAHP.H		478.243	1	478.243	478.241	4.5	203	122.14	>tr|A0A6P2AWW4|A0A6P2AWW4_9CYAN Uncharacterized protein OS=Spirulina sp. DLM2.Bin59 OX=2480215 GN=EA366_02820 PE=4 SV=1	21.7663	3099300
646	Q.QLTALFHQ.Q		479.256	2	957.504	957.515	-11.4	98	144.18	>tr|A0A6P2AYQ6|A0A6P2AYQ6_9CYAN Uncharacterized protein OS=Spirulina sp. DLM2.Bin59 OX=2480215 GN=EA366_05075 PE=4 SV=1	34.687	3045100
647	F.TYVDR.V		327.166	2	653.325	653.325	-0.6	1010	180.26	>tr|A0A6P2AKL0|A0A6P2AKL0_9CYAN Efflux RND transporter permease subunit OS=Spirulina sp. DLM2.Bin59 OX=2480215 GN=EA366_14490 PE=4 SV=1	17.8237	3006200
648	Q.QGLY.D		480.249	1	480.249	480.245	7.2	10	155.77	>tr|A0A6P2B1K3|A0A6P2B1K3_9CYAN Glutamate synthase large subunit OS=Spirulina sp. DLM2.Bin59 OX=2480215 GN=EA366_02595 PE=3 SV=1	28.7389	2980700
649	D.NIY.K		409.209	1	409.209	409.208	1.2	297	132.33	>tr|A0A6P2B0N9|A0A6P2B0N9_9CYAN Zeta-carotene desaturase OS=Spirulina sp. DLM2.Bin59 OX=2480215 GN=zds PE=3 SV=1	24.0402	2964500
650	V.AGPHP.Y		478.253	1	478.253	478.241	24.5	227	141.23	>tr|A0A6P2B0T2|A0A6P2B0T2_9CYAN Pyridoxal-phosphate dependent enzyme (Fragment) OS=Spirulina sp. DLM2.Bin59 OX=2480215 GN=EA366_01195 PE=3 SV=1	25.4846	2941000
651	N.LTFFYT.P		396.205	2	791.402	791.397	5.7	160	135.17	>tr|A0A6P2AQ84|A0A6P2AQ84_9CYAN Uncharacterized protein OS=Spirulina sp. DLM2.Bin59 OX=2480215 GN=EA366_13855 PE=4 SV=1	25.6468	2917000
652	F.TLPFPDT.A		395.7	2	790.393	790.398	-6.2	453	123.83	>tr|A0A6P2AR10|A0A6P2AR10_9CYAN GNAT family N-acetyltransferase OS=Spirulina sp. DLM2.Bin59 OX=2480215 GN=EA366_10945 PE=4 SV=1	25.6468	2917000
653	Q.QPQYFNAAREQ.I		676.324	2	1351.64	1351.64	1	60	103.92	>tr|A0A6P2ATR2|A0A6P2ATR2_9CYAN Peptidylprolyl isomerase OS=Spirulina sp. DLM2.Bin59 OX=2480215 GN=EA366_07675 PE=4 SV=1	17.9622	2865600
654	R.QPQPSPQDIS.H		548.777	2	1096.55	1096.53	18.7	75	117.34	>tr|A0A6P2AUC6|A0A6P2AUC6_9CYAN DUF4131 domain-containing protein OS=Spirulina sp. DLM2.Bin59 OX=2480215 GN=EA366_07985 PE=4 SV=1	48.5933	2854900
655	N.TAFPL.R		548.311	1	548.311	548.308	5.3	190	109.78	>tr|A0A6P2AIF5|A0A6P2AIF5_9CYAN EndoU_bacteria domain-containing protein OS=Spirulina sp. DLM2.Bin59 OX=2480215 GN=EA366_15435 PE=4 SV=1	48.5933	2854900
656	R.ISHVAL.Y		320.195	2	639.382	639.382	0	173	138.19	>tr|A0A6P2ANC0|A0A6P2ANC0_9CYAN NlpC/P60 family protein OS=Spirulina sp. DLM2.Bin59 OX=2480215 GN=EA366_13220 PE=3 SV=1	36.9814	2844200
657	D.TYY.R		446.195	1	446.195	446.192	6.2	839	113.61	>tr|A0A6P2AJR1|A0A6P2AJR1_9CYAN DUF1574 domain-containing protein OS=Spirulina sp. DLM2.Bin59 OX=2480215 GN=EA366_15565 PE=4 SV=1	23.5765	2834400
658	G.QSVI.N		446.264	1	446.264	446.261	5.9	280	107.24	>tr|A0A6P2AX72|A0A6P2AX72_9CYAN SulP family inorganic anion transporter OS=Spirulina sp. DLM2.Bin59 OX=2480215 GN=EA366_03340 PE=4 SV=1	23.5765	2834400
659	L.GGYIS.P		496.241	1	496.241	496.24	0.8	265	172.82	>tr|A0A6P2AI97|A0A6P2AI97_9CYAN DMT family transporter OS=Spirulina sp. DLM2.Bin59 OX=2480215 GN=EA366_15095 PE=4 SV=1	22.2605	2775300
660	V.IC[+57.021]GPRG.D	C[+57]	330.167	2	659.327	659.329	-3.5	800	106.62	>tr|A0A6P2AWG8|A0A6P2AWG8_9CYAN Cyclic nucleotide-binding domain-containing protein (Fragment) OS=Spirulina sp. DLM2.Bin59 OX=2480215 GN=EA366_03180 PE=4 SV=1	11.8889	2769900
661	S.LDY.L		410.193	1	410.193	410.192	1.7	466	136.53	>tr|A0A6P2AX54|A0A6P2AX54_9CYAN DUF3854 domain-containing protein OS=Spirulina sp. DLM2.Bin59 OX=2480215 GN=EA366_04245 PE=4 SV=1	35.1968	2745200
662	R.IAPDFRDV.A		466.749	2	932.491	932.484	8.1	55	154.82	>tr|A0A6P2AVD5|A0A6P2AVD5_9CYAN Alpha/beta hydrolase OS=Spirulina sp. DLM2.Bin59 OX=2480215 GN=EA366_05130 PE=4 SV=1	20.367	2737300
663	E.LSSRVNELE.N		523.78	2	1046.55	1046.55	5.5	541	116.36	>tr|A0A6P2AY77|A0A6P2AY77_9CYAN Type I secretion system permease/ATPase OS=Spirulina sp. DLM2.Bin59 OX=2480215 GN=EA366_02560 PE=4 SV=1	25.6411	2698200
664	H.LATPAR.F		314.692	2	628.376	628.378	-3.2	19	176.03	>tr|A0A6P2AU50|A0A6P2AU50_9CYAN TldD/PmbA family protein OS=Spirulina sp. DLM2.Bin59 OX=2480215 GN=EA366_08605 PE=3 SV=1	14.3945	2688800
665	T.VSLRVHT.Q		406.244	2	811.48	811.479	1.7	324	104.7	>tr|A0A6P2ARC6|A0A6P2ARC6_9CYAN Response regulator (Fragment) OS=Spirulina sp. DLM2.Bin59 OX=2480215 GN=EA366_10995 PE=4 SV=1	18.218	2687200
666	V.IEQALR.P		365.216	2	729.424	729.425	-1.5	225	134.11	>tr|A0A6P2AVB3|A0A6P2AVB3_9CYAN LytR family transcriptional regulator OS=Spirulina sp. DLM2.Bin59 OX=2480215 GN=EA366_08100 PE=3 SV=1	19.0465	2645800
667	S.SFNNY.C		644.266	1	644.266	644.268	-2	370	117.61	>tr|A0A6P2B328|A0A6P2B328_9CYAN Dynamin family protein OS=Spirulina sp. DLM2.Bin59 OX=2480215 GN=EA366_00185 PE=4 SV=1	19.9168	2634400
668	I.QGAQP.E		500.248	1	500.248	500.246	3.7	41	123.02	>tr|A0A6P2AV56|A0A6P2AV56_9CYAN Aldehyde dehydrogenase OS=Spirulina sp. DLM2.Bin59 OX=2480215 GN=EA366_07230 PE=3 SV=1	17.753	2600400
669	I.TPSFNQ.G		347.165	2	693.323	693.32	4.7	37	107.33	>tr|A0A6P2AX60|A0A6P2AX60_9CYAN Glycosyltransferase OS=Spirulina sp. DLM2.Bin59 OX=2480215 GN=EA366_07710 PE=4 SV=1	26.672	2577900
670	A.IKKISL.E		351.25	2	701.493	701.492	1	436	146.01	>tr|A0A6P2AMX9|A0A6P2AMX9_9CYAN 5-oxoprolinase (Fragment) OS=Spirulina sp. DLM2.Bin59 OX=2480215 GN=EA366_13440 PE=3 SV=1	52.398	2574600
671	Y.RHITTQGQ.T		470.752	2	940.498	940.496	1.9	48	195.86	>tr|A0A6P2B165|A0A6P2B165_9CYAN Uncharacterized protein (Fragment) OS=Spirulina sp. DLM2.Bin59 OX=2480215 GN=EA366_03350 PE=4 SV=1	10.3207	2514000
672	S.YNLFWDY.R		510.727	2	1020.45	1020.45	0.2	78	128.07	>tr|A0A6P2AW65|A0A6P2AW65_9CYAN DUF1963 domain-containing protein (Fragment) OS=Spirulina sp. DLM2.Bin59 OX=2480215 GN=EA366_03740 PE=4 SV=1	27.1302	2488500
673	P.QQPPQ.V		597.301	1	597.301	597.299	2.8	152	136	>tr|A0A6P2AM33|A0A6P2AM33_9CYAN Flavin-dependent dehydrogenase OS=Spirulina sp. DLM2.Bin59 OX=2480215 GN=EA366_12625 PE=4 SV=1	48.7092	2418100
674	I.AGLWFERY.V		521.263	2	1041.52	1041.52	2.6	440	141.08	>tr|A0A6P2AYW8|A0A6P2AYW8_9CYAN DUF2157 domain-containing protein OS=Spirulina sp. DLM2.Bin59 OX=2480215 GN=EA366_02610 PE=4 SV=1	31.9767	2360300
675	K.QQPEVFDQ.S		495.737	2	990.467	990.453	14.1	161	144.21	>tr|A0A6P2AY59|A0A6P2AY59_9CYAN Uma2 family endonuclease OS=Spirulina sp. DLM2.Bin59 OX=2480215 GN=EA366_03900 PE=4 SV=1	19.4391	2345500
676	T.IEVVGDPGKL.V		513.801	2	1026.6	1026.58	12	122	169.15	>tr|A0A6P2ATI4|A0A6P2ATI4_9CYAN Acetolactate synthase OS=Spirulina sp. DLM2.Bin59 OX=2480215 GN=ilvN PE=3 SV=1	19.677	2344800
677	E.LSQAQPTPIT.L		528.282	2	1055.56	1055.57	-16.5	202	134.54	>tr|A0A6P2AXA7|A0A6P2AXA7_9CYAN CHAT domain-containing protein OS=Spirulina sp. DLM2.Bin59 OX=2480215 GN=EA366_07495 PE=4 SV=1	22.6595	2260300
678	V.TADLVR.Q		337.695	2	674.382	674.383	-1.3	303	176.72	>tr|A0A6P2AHB5|A0A6P2AHB5_9CYAN ATP-dependent DNA helicase RecG (Fragment) OS=Spirulina sp. DLM2.Bin59 OX=2480215 GN=EA366_15825 PE=3 SV=1	24.5467	2248400
679	I.VTQFYPPD.Y		483.739	2	966.471	966.457	14.7	12	110.53	>tr|A0A6P2AXV0|A0A6P2AXV0_9CYAN Glycosyltransferase WbuB OS=Spirulina sp. DLM2.Bin59 OX=2480215 GN=EA366_01245 PE=4 SV=1	40.1672	2246000
680	Q.TVTY.R		483.247	1	483.247	483.245	3.1	258	124.08	>tr|A0A6P2APP3|A0A6P2APP3_9CYAN Helix-turn-helix domain-containing protein OS=Spirulina sp. DLM2.Bin59 OX=2480215 GN=EA366_12010 PE=4 SV=1	22.2773	2241000
681	H.TPTY.E		481.227	1	481.227	481.229	-5.5	328	107.45	>tr|A0A6P2AYH1|A0A6P2AYH1_9CYAN Uncharacterized protein OS=Spirulina sp. DLM2.Bin59 OX=2480215 GN=EA366_03320 PE=4 SV=1	22.2773	2241000
682	Y.HLPSFDAP.T		442.223	2	883.439	883.431	9	59	127.88	>tr|A0A6P2AXA9|A0A6P2AXA9_9CYAN Response regulator OS=Spirulina sp. DLM2.Bin59 OX=2480215 GN=EA366_02160 PE=4 SV=1	10.2222	2234900
683	P.ILNDR.G		315.681	2	630.355	630.357	-3.1	414	148.61	>tr|A0A6P2AVV2|A0A6P2AVV2_9CYAN PAS domain S-box protein OS=Spirulina sp. DLM2.Bin59 OX=2480215 GN=EA366_09255 PE=4 SV=1	12.023	2226500
684	Q.QQPLRIG.I		406.244	2	811.481	811.479	2.7	3	111.58	>tr|A0A6P2AWI2|A0A6P2AWI2_9CYAN NAD(P)/FAD-dependent oxidoreductase OS=Spirulina sp. DLM2.Bin59 OX=2480215 GN=EA366_06885 PE=4 SV=1	18.3891	2174600
685	S.LYNPR.Q		331.684	2	662.361	662.362	-2.2	187	141.86	>tr|A0A6P2AW32|A0A6P2AW32_9CYAN Peptidyl-tRNA hydrolase OS=Spirulina sp. DLM2.Bin59 OX=2480215 GN=pth PE=3 SV=1	22.0075	2081300
686	F.LTGNTR.T		331.186	2	661.365	661.363	3.9	271	100.8	>tr|A0A6P2AX23|A0A6P2AX23_9CYAN Glutamate synthase subunit beta OS=Spirulina sp. DLM2.Bin59 OX=2480215 GN=EA366_02600 PE=4 SV=1	22.0075	2081300
687	N.THNPQSQSE.E		514.221	2	1027.44	1027.44	-8	33	151.32	>tr|A0A6P2ALE7|A0A6P2ALE7_9CYAN GTP cyclohydrolase 1 OS=Spirulina sp. DLM2.Bin59 OX=2480215 GN=folE PE=3 SV=1	17.0258	2072200
688	I.LDPRLH.T		375.717	2	750.426	750.426	0.6	452	219.66	>tr|A0A6P2AMJ2|A0A6P2AMJ2_9CYAN Uncharacterized protein (Fragment) OS=Spirulina sp. DLM2.Bin59 OX=2480215 GN=EA366_12600 PE=4 SV=1	17.8749	2035000
689	P.IPALL.A		526.363	1	526.363	526.36	5.8	639	238.79	>tr|A0A6P2B1K3|A0A6P2B1K3_9CYAN Glutamate synthase large subunit OS=Spirulina sp. DLM2.Bin59 OX=2480215 GN=EA366_02595 PE=3 SV=1	52.1825	2023000
690	E.LSANPNR.S		386.215	2	771.422	771.411	14.7	491	125.25	>tr|A0A6P2AQD2|A0A6P2AQD2_9CYAN Translation initiation factor IF-2 (Fragment) OS=Spirulina sp. DLM2.Bin59 OX=2480215 GN=EA366_13740 PE=3 SV=1	15.5903	2015800
691	I.TAF.F		338.182	1	338.182	338.171	33.5	57	101.5	>tr|A0A6P2AX72|A0A6P2AX72_9CYAN SulP family inorganic anion transporter OS=Spirulina sp. DLM2.Bin59 OX=2480215 GN=EA366_03340 PE=4 SV=1	16.473	1992100
692	L.KYI.N		423.261	1	423.261	423.26	2.4	343	150.81	>tr|A0A6P2AYN9|A0A6P2AYN9_9CYAN Sulfate/thiosulfate import ATP-binding protein CysA OS=Spirulina sp. DLM2.Bin59 OX=2480215 GN=cysA PE=3 SV=1	18.7128	1970900
693	K.TFRGREPQ.T		495.755	2	990.503	990.512	-8.3	666	104.46	>tr|A0A6P2AYV9|A0A6P2AYV9_9CYAN M3 family peptidase OS=Spirulina sp. DLM2.Bin59 OX=2480215 GN=EA366_00195 PE=3 SV=1	13.9238	1963300
694	G.LAPGHYTL.C		436.237	2	871.466	871.467	-0.9	113	127.48	>tr|A0A6P2AWV0|A0A6P2AWV0_9CYAN Rhodanese domain-containing protein (Fragment) OS=Spirulina sp. DLM2.Bin59 OX=2480215 GN=EA366_08010 PE=4 SV=1	16.242	1885700
695	N.IDLW.V		546.293	1	546.293	546.292	2.4	377	135.07	>tr|A0A6P2AYE9|A0A6P2AYE9_9CYAN ABC transporter ATP-binding protein OS=Spirulina sp. DLM2.Bin59 OX=2480215 GN=EA366_02810 PE=4 SV=1	56.2892	1877100
696	G.VVVPPK.L		319.715	2	638.423	638.424	-1.1	958	136.85	>tr|A0A6P2ANY1|A0A6P2ANY1_9CYAN DEAD/DEAH box helicase (Fragment) OS=Spirulina sp. DLM2.Bin59 OX=2480215 GN=EA366_12030 PE=4 SV=1	16.3441	1804800
697	N.RSLQRYSAV.E		540.301	2	1079.59	1079.6	-1.5	271	101.85	>tr|A0A6P2AXZ5|A0A6P2AXZ5_9CYAN DUF262 domain-containing protein OS=Spirulina sp. DLM2.Bin59 OX=2480215 GN=EA366_08205 PE=4 SV=1	28.1318	1718800
698	D.TVPYR.R		318.181	2	635.354	635.351	5.1	859	181.62	>tr|A0A6P2AXD3|A0A6P2AXD3_9CYAN Phycobiliprotein ApcE OS=Spirulina sp. DLM2.Bin59 OX=2480215 GN=EA366_03280 PE=3 SV=1	18.349	1684900
699	V.VVFHTADLK.R		515.292	2	1029.58	1029.57	4.4	424	142.7	>tr|A0A6P2APR0|A0A6P2APR0_9CYAN SagB/ThcOx family dehydrogenase OS=Spirulina sp. DLM2.Bin59 OX=2480215 GN=EA366_12445 PE=4 SV=1	25.5759	1636900
700	G.GIFF.A		483.261	1	483.261	483.26	1.5	683	129.8	>tr|A0A6P2B061|A0A6P2B061_9CYAN Helicase (Fragment) OS=Spirulina sp. DLM2.Bin59 OX=2480215 GN=EA366_05180 PE=4 SV=1	59.5093	1631000
701	D.TEFNLVP.T		410.21	2	819.413	819.425	-14	418	150.37	>tr|A0A6P2ASP1|A0A6P2ASP1_9CYAN DUF4114 domain-containing protein (Fragment) OS=Spirulina sp. DLM2.Bin59 OX=2480215 GN=EA366_11560 PE=4 SV=1	20.1324	1629300
702	L.LILQI.F		599.413	1	599.413	599.413	1.4	877	106.76	>tr|A0A6P2AVV2|A0A6P2AVV2_9CYAN PAS domain S-box protein OS=Spirulina sp. DLM2.Bin59 OX=2480215 GN=EA366_09255 PE=4 SV=1	56.8449	1597900
703	R.EIEFPIRR.D		530.311	2	1059.61	1059.59	18.6	195	152.5	>tr|A0A6P2ATW4|A0A6P2ATW4_9CYAN PDZ domain-containing protein OS=Spirulina sp. DLM2.Bin59 OX=2480215 GN=EA366_07465 PE=3 SV=1	45.3921	1500200
704	Y.LSNQLLVP.I		883.524	1	883.524	883.525	-0.2	614	149.18	>tr|A0A6P2AWE9|A0A6P2AWE9_9CYAN Uncharacterized protein OS=Spirulina sp. DLM2.Bin59 OX=2480215 GN=EA366_03185 PE=4 SV=1	61.691	1253600
705	V.VIF.D		378.239	1	378.239	378.239	-0.4	411	185.38	>tr|A0A6P2AX54|A0A6P2AX54_9CYAN DUF3854 domain-containing protein OS=Spirulina sp. DLM2.Bin59 OX=2480215 GN=EA366_04245 PE=4 SV=1	44.6103	1244200
706	T.TLTY.T		497.263	1	497.263	497.261	5.1	16	172.71	>tr|A0A6P2AL84|A0A6P2AL84_9CYAN DUF11 domain-containing protein OS=Spirulina sp. DLM2.Bin59 OX=2480215 GN=EA366_14385 PE=4 SV=1	22.3676	1206900
707	G.FLHYEERL.L		553.787	2	1106.57	1106.56	3.5	58	103.67	>tr|A0A6P2AJD9|A0A6P2AJD9_9CYAN Carboxylate-amine ligase (Fragment) OS=Spirulina sp. DLM2.Bin59 OX=2480215 GN=EA366_15705 PE=4 SV=1	57.0647	1115600
708	E.QLTHSQIQ.R		477.76	2	954.513	954.5	13.4	1500	105.36	>tr|A0A6P2ANY1|A0A6P2ANY1_9CYAN DEAD/DEAH box helicase (Fragment) OS=Spirulina sp. DLM2.Bin59 OX=2480215 GN=EA366_12030 PE=4 SV=1	10.7712	994530
709	L.LLARERTE.D		494.284	2	987.561	987.558	2.8	130	192.87	>tr|A0A6P2AUT7|A0A6P2AUT7_9CYAN Tetratricopeptide repeat protein (Fragment) OS=Spirulina sp. DLM2.Bin59 OX=2480215 GN=EA366_07750 PE=4 SV=1	20.4205	985520
710	L.LQFPL.W		617.367	1	617.367	617.366	1.9	343	132.08	>tr|A0A6P2AYJ9|A0A6P2AYJ9_9CYAN DUF3086 domain-containing protein (Fragment) OS=Spirulina sp. DLM2.Bin59 OX=2480215 GN=EA366_01115 PE=4 SV=1	59.6937	976800
711	A.LAGALI.Q		557.367	1	557.367	557.366	3.1	407	162.68	>tr|A0A6P2AWD0|A0A6P2AWD0_9CYAN Uncharacterized protein OS=Spirulina sp. DLM2.Bin59 OX=2480215 GN=EA366_07665 PE=4 SV=1	50.3988	931880
712	S.IIAPDAFIQ.T		494.274	2	987.54	987.551	-10.9	104	155.86	>tr|A0A6P2AU70|A0A6P2AU70_9CYAN dTDP-glucose 4,6-dehydratase OS=Spirulina sp. DLM2.Bin59 OX=2480215 GN=rfbB PE=3 SV=1	20.4008	844270
713	A.VPGFI.V		532.317	1	532.317	532.313	6.9	116	108.42	>tr|A0A6P2ARR0|A0A6P2ARR0_9CYAN Nuclease SbcCD subunit D OS=Spirulina sp. DLM2.Bin59 OX=2480215 GN=sbcD PE=3 SV=1	60.396	730340
714	D.LFGQ.A		464.254	1	464.254	464.25	7.1	255	271.09	>tr|A0A6P2AUS6|A0A6P2AUS6_9CYAN NCS2 family permease OS=Spirulina sp. DLM2.Bin59 OX=2480215 GN=EA366_11060 PE=3 SV=1	29.3816	0
715	P.FRDY.A		300.642	2	600.277	600.278	-0.9	128	269.18	>tr|A0A6P2APF6|A0A6P2APF6_9CYAN Cupin-like domain-containing protein OS=Spirulina sp. DLM2.Bin59 OX=2480215 GN=EA366_12090 PE=4 SV=1	19.492	0
716	F.QPFQPQQ.P		872.426	1	872.426	872.426	0.2	57	237.74	>tr|A0A6P2APA7|A0A6P2APA7_9CYAN Glycosyltransferase OS=Spirulina sp. DLM2.Bin59 OX=2480215 GN=EA366_11530 PE=4 SV=1	26.6847	0
717	V.VGFA.V		393.213	1	393.213	393.213	-0.6	282	229.66	>tr|A0A6P2AKL0|A0A6P2AKL0_9CYAN Efflux RND transporter permease subunit OS=Spirulina sp. DLM2.Bin59 OX=2480215 GN=EA366_14490 PE=4 SV=1	28.0716	0
718	F.QFLAGQ.S		663.348	1	663.348	663.346	3.4	155	215.12	>tr|A0A6P2AXG2|A0A6P2AXG2_9CYAN DNA-binding response regulator OS=Spirulina sp. DLM2.Bin59 OX=2480215 GN=EA366_02800 PE=4 SV=1	33.3518	0
719	Q.QVSF.L		480.247	1	480.247	480.245	3.4	557	213.36	>tr|A0A6P2AQ16|A0A6P2AQ16_9CYAN StlD/DarB family beta-ketosynthase OS=Spirulina sp. DLM2.Bin59 OX=2480215 GN=EA366_11835 PE=4 SV=1	41.1342	0
720	P.QILPQ.L		598.358	1	598.358	598.356	4.2	73	209.99	>tr|A0A6P2AR22|A0A6P2AR22_9CYAN Pyrroline-5-carboxylate reductase OS=Spirulina sp. DLM2.Bin59 OX=2480215 GN=proC PE=3 SV=1	34.0771	0
721	F.LRLDQDPY.L		510.265	2	1019.52	1019.52	7.6	553	203.49	>tr|A0A6P2B0D4|A0A6P2B0D4_9CYAN UPF0182 family protein (Fragment) OS=Spirulina sp. DLM2.Bin59 OX=2480215 GN=EA366_02025 PE=4 SV=1	28.1921	0
722	R.HPGAP.R		478.231	1	478.231	478.241	-19.7	45	202.65	>tr|A0A6P2AZ55|A0A6P2AZ55_9CYAN Integrase_SAM-like_N domain-containing protein OS=Spirulina sp. DLM2.Bin59 OX=2480215 GN=EA366_02925 PE=4 SV=1	22.6886	0
723	T.FNP.A		377.182	1	377.182	377.182	1.3	1032	198.92	>tr|A0A6P2AY04|A0A6P2AY04_9CYAN Helicase (Fragment) OS=Spirulina sp. DLM2.Bin59 OX=2480215 GN=EA366_03670 PE=4 SV=1	25.9406	0
724	N.QVTH.M		484.255	1	484.255	484.251	8.3	276	198.65	>tr|A0A6P2AS33|A0A6P2AS33_9CYAN PAS domain S-box protein OS=Spirulina sp. DLM2.Bin59 OX=2480215 GN=EA366_11435 PE=4 SV=1	23.5807	0
725	K.QLTH.L		498.268	1	498.268	498.267	2.2	258	193.98	>tr|A0A6P2AU66|A0A6P2AU66_9CYAN Uncharacterized protein OS=Spirulina sp. DLM2.Bin59 OX=2480215 GN=EA366_08165 PE=4 SV=1	17.4132	0
726	G.QSPY.L		494.227	1	494.227	494.224	4.7	423	189.69	>tr|A0A6P2AUR1|A0A6P2AUR1_9CYAN DNA mismatch repair protein MutS OS=Spirulina sp. DLM2.Bin59 OX=2480215 GN=mutS PE=3 SV=1	18.2937	0
727	I.QGAGVL.I		544.311	1	544.311	544.309	3.1	608	185.84	>tr|A0A6P2B307|A0A6P2B307_9CYAN Histidine kinase (Fragment) OS=Spirulina sp. DLM2.Bin59 OX=2480215 GN=EA366_00285 PE=4 SV=1	24.0849	0
728	L.QQPF.Q		519.257	1	519.257	519.256	1.9	264	184.77	>tr|A0A6P2AHT1|A0A6P2AHT1_9CYAN Type II/IV secretion system protein OS=Spirulina sp. DLM2.Bin59 OX=2480215 GN=EA366_15460 PE=3 SV=1	27.0905	0
729	C.WHPD.H		554.239	1	554.239	554.236	5.7	216	184.75	>tr|A0A6P2AWG1|A0A6P2AWG1_9CYAN S-methyl-5'-thioadenosine phosphorylase OS=Spirulina sp. DLM2.Bin59 OX=2480215 GN=mtnP PE=3 SV=1	17.5839	0
730	L.LTSVATHGHA.P		497.265	2	993.523	993.511	12.3	582	184.54	>tr|A0A6P2AK89|A0A6P2AK89_9CYAN Isoleucine--tRNA ligase OS=Spirulina sp. DLM2.Bin59 OX=2480215 GN=ileS PE=3 SV=1	31.2139	0
731	L.QHPQ.S		509.248	1	509.248	509.247	1.6	259	181.37	>tr|A0A6P2AW28|A0A6P2AW28_9CYAN Restriction endonuclease (Fragment) OS=Spirulina sp. DLM2.Bin59 OX=2480215 GN=EA366_08060 PE=4 SV=1	20.9249	0
732	V.VEWR.D		589.313	1	589.313	589.309	5.7	157	180.1	>tr|A0A6P2AX19|A0A6P2AX19_9CYAN Methionine--tRNA ligase OS=Spirulina sp. DLM2.Bin59 OX=2480215 GN=metG PE=3 SV=1	23.101	0
733	E.QHPQMI.L		753.369	1	753.369	753.371	-3.5	63	177.28	>tr|A0A6P2AXG2|A0A6P2AXG2_9CYAN DNA-binding response regulator OS=Spirulina sp. DLM2.Bin59 OX=2480215 GN=EA366_02800 PE=4 SV=1	29.2362	0
734	T.TTPFHFG.P		403.69	2	806.373	806.383	-12.4	469	175.24	>tr|A0A6P2AZ35|A0A6P2AZ35_9CYAN Serine/threonine protein kinase OS=Spirulina sp. DLM2.Bin59 OX=2480215 GN=EA366_02975 PE=4 SV=1	21.8938	0
735	A.ELILQ.E		615.374	1	615.374	615.371	4	820	171.32	>tr|A0A6P2ANI6|A0A6P2ANI6_9CYAN BON domain-containing protein OS=Spirulina sp. DLM2.Bin59 OX=2480215 GN=EA366_12105 PE=4 SV=1	36.5428	0
736	T.LGFA.Y		407.23	1	407.23	407.229	2.1	581	170.96	>tr|A0A6P2AXX2|A0A6P2AXX2_9CYAN P-type Ca(2+) transporter OS=Spirulina sp. DLM2.Bin59 OX=2480215 GN=EA366_03175 PE=4 SV=1	34.4962	0
737	L.GQAPEFAQ.I		847.391	1	847.391	847.394	-3.7	158	166.83	>tr|A0A6P2APF6|A0A6P2APF6_9CYAN Cupin-like domain-containing protein OS=Spirulina sp. DLM2.Bin59 OX=2480215 GN=EA366_12090 PE=4 SV=1	27.0189	0
738	L.ILQQSEQH.Q		491.756	2	982.505	982.495	9.7	645	164.28	>tr|A0A6P2AUT9|A0A6P2AUT9_9CYAN Type 2 lantipeptide synthetase LanM OS=Spirulina sp. DLM2.Bin59 OX=2480215 GN=lanM PE=4 SV=1	41.8476	0
739	W.QIPPQGETPH.V		552.284	2	1103.56	1103.55	11.3	623	161.99	>tr|A0A6P2AHP8|A0A6P2AHP8_9CYAN Serine/threonine protein kinase OS=Spirulina sp. DLM2.Bin59 OX=2480215 GN=EA366_15520 PE=4 SV=1	14.2792	0
740	L.QQPTSTAW.L		918.433	1	918.433	918.432	1.2	8	158.26	>tr|A0A6P2B2U3|A0A6P2B2U3_9CYAN tRNA-(Ms[2]io[6]A)-hydroxylase OS=Spirulina sp. DLM2.Bin59 OX=2480215 GN=EA366_00665 PE=4 SV=1	26.3413	0
741	K.LDPVIGR.D		385.232	2	769.456	769.457	-0.6	179	155.6	>tr|A0A6P2AYP5|A0A6P2AYP5_9CYAN Chaperone protein ClpB OS=Spirulina sp. DLM2.Bin59 OX=2480215 GN=clpB PE=3 SV=1	27.9957	0
742	T.VPIYQ.A		619.349	1	619.349	619.345	6.1	136	155.44	>tr|A0A6P2ARJ3|A0A6P2ARJ3_9CYAN Phosphomethylpyrimidine synthase OS=Spirulina sp. DLM2.Bin59 OX=2480215 GN=thiC PE=3 SV=1	43.3678	0
743	D.IGPDSV.K		587.307	1	587.307	587.303	5	300	154.95	>tr|A0A6P2AWI8|A0A6P2AWI8_9CYAN Phosphoglycerate kinase OS=Spirulina sp. DLM2.Bin59 OX=2480215 GN=pgk PE=3 SV=1	40.8568	0
744	P.AATQTIPVETSEFSL.D		797.415	2	1593.82	1593.8	13.5	23	153.16	>tr|A0A6P2ATV0|A0A6P2ATV0_9CYAN Uncharacterized protein (Fragment) OS=Spirulina sp. DLM2.Bin59 OX=2480215 GN=EA366_07515 PE=4 SV=1	31.7067	0
745	S.QPQPSLHFP.L		525.768	2	1050.53	1050.54	-8.1	58	151.45	>tr|A0A6P2AKP5|A0A6P2AKP5_9CYAN NERD domain-containing protein OS=Spirulina sp. DLM2.Bin59 OX=2480215 GN=EA366_14950 PE=4 SV=1	47.2421	0
746	P.LFGTD.G		552.27	1	552.27	552.266	6.9	33	150.37	>tr|A0A6P2AVK2|A0A6P2AVK2_9CYAN Phosphoglucosamine mutase OS=Spirulina sp. DLM2.Bin59 OX=2480215 GN=glmM PE=3 SV=1	31.3809	0
747	M.LHP.V		366.214	1	366.214	366.214	0	173	147.16	>tr|A0A6P2AZJ7|A0A6P2AZJ7_9CYAN Phosphoenolpyruvate synthase OS=Spirulina sp. DLM2.Bin59 OX=2480215 GN=EA366_06245 PE=4 SV=1	15.4693	0
748	M.VLEVR.S		308.195	2	615.382	615.382	-1.2	376	142.88	>tr|A0A6P2ATU9|A0A6P2ATU9_9CYAN Polysaccharide biosynthesis tyrosine autokinase OS=Spirulina sp. DLM2.Bin59 OX=2480215 GN=EA366_08920 PE=4 SV=1	18.29	0
749	G.LAVG.L		359.24	1	359.24	359.229	30.4	425	142.27	>tr|A0A6P2AUS6|A0A6P2AUS6_9CYAN NCS2 family permease OS=Spirulina sp. DLM2.Bin59 OX=2480215 GN=EA366_11060 PE=3 SV=1	17.2238	0
750	L.SLPLGTMV.Q		409.231	2	817.454	817.449	6.6	235	140.95	>tr|A0A6P2AXT6|A0A6P2AXT6_9CYAN Uncharacterized protein OS=Spirulina sp. DLM2.Bin59 OX=2480215 GN=EA366_06705 PE=4 SV=1	14.0158	0
751	V.IAHSVV.P		313.186	2	625.364	625.367	-3.9	34	140.77	>tr|A0A6P2AVY1|A0A6P2AVY1_9CYAN Metal ABC transporter permease OS=Spirulina sp. DLM2.Bin59 OX=2480215 GN=EA366_10180 PE=3 SV=1	21.4957	0
752	L.FPHRP.P		327.179	2	653.35	653.352	-2.2	288	139.24	>tr|A0A6P2AKW0|A0A6P2AKW0_9CYAN Beta-ketoacyl-ACP synthase OS=Spirulina sp. DLM2.Bin59 OX=2480215 GN=EA366_14285 PE=3 SV=1	16.5333	0
753	V.VNLQR.N		315.19	2	629.372	629.373	-1	429	139.15	>tr|A0A6P2AHP8|A0A6P2AHP8_9CYAN Serine/threonine protein kinase OS=Spirulina sp. DLM2.Bin59 OX=2480215 GN=EA366_15520 PE=4 SV=1	15.8681	0
754	C.LSHPQV.H		340.69	2	680.372	680.373	-1.1	238	139.02	>tr|A0A6P2AZR3|A0A6P2AZR3_9CYAN Aldo/keto reductase (Fragment) OS=Spirulina sp. DLM2.Bin59 OX=2480215 GN=EA366_00460 PE=4 SV=1	14.0364	0
755	Q.QQPPL.A		582.327	1	582.327	582.325	4.3	191	136.29	>tr|A0A6P2AYX2|A0A6P2AYX2_9CYAN Uncharacterized protein OS=Spirulina sp. DLM2.Bin59 OX=2480215 GN=EA366_03325 PE=4 SV=1	25.3857	0
756	L.LAL.A		316.223	1	316.223	316.223	-1.3	364	135.68	>tr|A0A6P2AM50|A0A6P2AM50_9CYAN HAMP domain-containing protein OS=Spirulina sp. DLM2.Bin59 OX=2480215 GN=EA366_12590 PE=4 SV=1	35.4658	0
757	D.DLLIK.I		601.393	1	601.393	601.392	2.4	73	135.15	>tr|A0A6P2AM04|A0A6P2AM04_9CYAN Response regulator OS=Spirulina sp. DLM2.Bin59 OX=2480215 GN=EA366_12855 PE=4 SV=1	32.0495	0
758	T.AGPRFYVFR.D		556.795	2	1112.58	1112.6	-15.2	183	135.12	>tr|A0A6P2AZ52|A0A6P2AZ52_9CYAN Zn-dependent hydrolase (Fragment) OS=Spirulina sp. DLM2.Bin59 OX=2480215 GN=EA366_00040 PE=4 SV=1	21.7828	0
759	T.YLAQ.R		494.263	1	494.263	494.261	3.4	460	133.71	>tr|A0A6P2ALP3|A0A6P2ALP3_9CYAN Coproporphyrinogen-III oxidase OS=Spirulina sp. DLM2.Bin59 OX=2480215 GN=hemN PE=3 SV=1	16.2378	0
760	I.QQAGN.I		517.232	1	517.232	517.236	-8.2	205	133.52	>tr|A0A6P2AUP7|A0A6P2AUP7_9CYAN Restriction endonuclease OS=Spirulina sp. DLM2.Bin59 OX=2480215 GN=EA366_07180 PE=4 SV=1	26.1028	0
761	G.QALPQ.G		556.309	1	556.309	556.309	0.5	340	133.32	>tr|A0A6P2AWF9|A0A6P2AWF9_9CYAN ABC transporter ATP-binding protein OS=Spirulina sp. DLM2.Bin59 OX=2480215 GN=EA366_04770 PE=4 SV=1	19.5101	0
762	N.FSP.S		350.17	1	350.17	350.171	-1.9	358	131.75	>tr|A0A6P2AYN9|A0A6P2AYN9_9CYAN Sulfate/thiosulfate import ATP-binding protein CysA OS=Spirulina sp. DLM2.Bin59 OX=2480215 GN=cysA PE=3 SV=1	21.4943	0
763	H.VGYP.P		435.224	1	435.224	435.224	1.7	71	130.93	>tr|A0A6P2ATI0|A0A6P2ATI0_9CYAN Fe-S cluster assembly protein SufB OS=Spirulina sp. DLM2.Bin59 OX=2480215 GN=sufB PE=3 SV=1	26.848	0
764	F.VEGFPK.P		676.367	1	676.367	676.366	0.4	795	130.81	>tr|A0A6P2AMX9|A0A6P2AMX9_9CYAN 5-oxoprolinase (Fragment) OS=Spirulina sp. DLM2.Bin59 OX=2480215 GN=EA366_13440 PE=3 SV=1	33.3902	0
765	G.DRPPSSVGAL.A		998.528	1	998.528	998.527	1.2	49	129.68	>tr|A0A6P2AUS4|A0A6P2AUS4_9CYAN Uncharacterized protein OS=Spirulina sp. DLM2.Bin59 OX=2480215 GN=EA366_09025 PE=4 SV=1	26.0435	0
766	D.SIGDFIK.S		779.43	1	779.43	779.43	0.7	145	127.53	>tr|A0A6P2ARN6|A0A6P2ARN6_9CYAN Uncharacterized protein OS=Spirulina sp. DLM2.Bin59 OX=2480215 GN=EA366_11370 PE=4 SV=1	34.1839	0
767	A.FDFGK.R		613.302	1	613.302	613.298	5.6	235	126.93	>tr|A0A6P2AR66|A0A6P2AR66_9CYAN NAD-dependent epimerase/dehydratase family protein (Fragment) OS=Spirulina sp. DLM2.Bin59 OX=2480215 GN=EA366_10120 PE=4 SV=1	33.906	0
768	A.AGKDPQPFDFS.I		604.791	2	1208.57	1208.56	13.5	444	124.48	>tr|A0A6P2AM10|A0A6P2AM10_9CYAN DUF4070 domain-containing protein OS=Spirulina sp. DLM2.Bin59 OX=2480215 GN=EA366_12775 PE=4 SV=1	37.8912	0
769	G.LGAKLER.V		393.745	2	786.482	786.483	-1.6	432	124.14	>tr|A0A6P2B082|A0A6P2B082_9CYAN UDP-N-acetylglucosamine 1-carboxyvinyltransferase OS=Spirulina sp. DLM2.Bin59 OX=2480215 GN=murA PE=3 SV=1	15.0017	0
770	L.AYAFSQ.E		686.315	1	686.315	686.314	0.9	305	123.73	>tr|A0A6P2AV51|A0A6P2AV51_9CYAN DUF3536 domain-containing protein OS=Spirulina sp. DLM2.Bin59 OX=2480215 GN=EA366_09155 PE=4 SV=1	42.9656	0
771	G.ISHYSFVL.L		483.257	2	965.507	965.509	-2.2	91	122.28	>tr|A0A6P2AMJ5|A0A6P2AMJ5_9CYAN Uncharacterized protein OS=Spirulina sp. DLM2.Bin59 OX=2480215 GN=EA366_15570 PE=3 SV=1	39.9587	0
772	G.YDRF.R		300.642	2	600.276	600.278	-2.5	18	122.04	>tr|A0A6P2ASP2|A0A6P2ASP2_9CYAN DNA helicase OS=Spirulina sp. DLM2.Bin59 OX=2480215 GN=recQ PE=3 SV=1	21.4627	0
773	S.QPQKAIENFPL.Q		642.852	2	1284.7	1284.69	1.8	48	119.58	>tr|A0A6P2AVP4|A0A6P2AVP4_9CYAN Peptidase M15A OS=Spirulina sp. DLM2.Bin59 OX=2480215 GN=EA366_10360 PE=4 SV=1	47.7092	0
774	Q.QYPF.T		554.263	1	554.263	554.261	4.1	189	118.87	>tr|A0A6P2ASR3|A0A6P2ASR3_9CYAN DUF1868 domain-containing protein OS=Spirulina sp. DLM2.Bin59 OX=2480215 GN=EA366_09375 PE=4 SV=1	37.3717	0
775	L.LPQPWR.A		796.458	1	796.458	796.446	14.6	277	118.74	>tr|A0A6P2ALR3|A0A6P2ALR3_9CYAN Phytoene dehydrogenase OS=Spirulina sp. DLM2.Bin59 OX=2480215 GN=pds PE=3 SV=1	31.4481	0
776	Q.LLMRDG.I		352.692	2	704.376	704.376	0.2	548	118.31	>tr|A0A6P2AS54|A0A6P2AS54_9CYAN ATP-binding cassette domain-containing protein OS=Spirulina sp. DLM2.Bin59 OX=2480215 GN=EA366_11130 PE=4 SV=1	23.6609	0
777	S.LTPSRANG.F		408.223	2	815.438	815.437	1.3	115	117.75	>tr|A0A6P2B0I1|A0A6P2B0I1_9CYAN SufE family protein OS=Spirulina sp. DLM2.Bin59 OX=2480215 GN=EA366_04570 PE=3 SV=1	13.5907	0
778	E.TLTAGGPR.K		386.719	2	772.431	772.431	-0.4	40	117.57	>tr|A0A6P2AWD9|A0A6P2AWD9_9CYAN Caspase family protein OS=Spirulina sp. DLM2.Bin59 OX=2480215 GN=EA366_06700 PE=4 SV=1	18.2428	0
779	L.PLWTSSL.L		803.427	1	803.427	803.43	-3.4	123	117.55	>tr|A0A6P2ARU8|A0A6P2ARU8_9CYAN ABC transporter permease OS=Spirulina sp. DLM2.Bin59 OX=2480215 GN=EA366_10195 PE=3 SV=1	56.0768	0
780	Q.IVR.K		387.262	1	387.262	387.271	-25.2	229	115.54	>tr|A0A6P2AZJ7|A0A6P2AZJ7_9CYAN Phosphoenolpyruvate synthase OS=Spirulina sp. DLM2.Bin59 OX=2480215 GN=EA366_06245 PE=4 SV=1	22.8382	0
781	P.FPSG.D		407.193	1	407.193	407.192	1.2	229	114.42	>tr|A0A6P2AWA4|A0A6P2AWA4_9CYAN Serine/threonine-protein kinase PknK (Fragment) OS=Spirulina sp. DLM2.Bin59 OX=2480215 GN=EA366_04690 PE=4 SV=1	19.963	0
782	T.TYRHV.G		338.182	2	675.356	675.357	-1.2	379	114.3	>tr|A0A6P2AZ57|A0A6P2AZ57_9CYAN Glycerol-3-phosphate dehydrogenase OS=Spirulina sp. DLM2.Bin59 OX=2480215 GN=EA366_00695 PE=3 SV=1	20.2451	0
783	P.LFFYLPQ.A		464.254	2	927.5	927.497	2.8	369	112.62	>tr|A0A6P2AU21|A0A6P2AU21_9CYAN Sulfate permease OS=Spirulina sp. DLM2.Bin59 OX=2480215 GN=sulP PE=3 SV=1	29.3816	0
784	H.LGEIAK.L		315.695	2	630.382	630.382	-0.7	189	112.23	>tr|A0A6P2AUP8|A0A6P2AUP8_9CYAN DNA polymerase III subunit gamma/tau (Fragment) OS=Spirulina sp. DLM2.Bin59 OX=2480215 GN=dnaX PE=3 SV=1	19.5503	0
785	A.TAAQRANAY.D		483.248	2	965.488	965.48	8.1	466	109.23	>tr|A0A6P2AYE9|A0A6P2AYE9_9CYAN ABC transporter ATP-binding protein OS=Spirulina sp. DLM2.Bin59 OX=2480215 GN=EA366_02810 PE=4 SV=1	27.6565	0
786	Q.GVSLRQ.W		659.383	1	659.383	659.384	-0.1	15	109.06	>tr|A0A6P2AZH4|A0A6P2AZH4_9CYAN Serine/threonine protein kinase (Fragment) OS=Spirulina sp. DLM2.Bin59 OX=2480215 GN=EA366_00110 PE=4 SV=1	19.7243	0
787	Y.VHAY.H		489.246	1	489.246	489.246	0.9	384	108.36	>tr|A0A6P2AK06|A0A6P2AK06_9CYAN S-layer protein OS=Spirulina sp. DLM2.Bin59 OX=2480215 GN=EA366_14130 PE=3 SV=1	15.0293	0
788	V.TVDYFATTGR.R		377.524	3	1130.56	1130.55	8.9	117	107.88	>tr|A0A6P2ALE8|A0A6P2ALE8_9CYAN ABC transporter permease OS=Spirulina sp. DLM2.Bin59 OX=2480215 GN=EA366_15150 PE=4 SV=1	17.2252	0
789	G.DPLPPPDLG.M		920.466	1	920.466	920.472	-7.1	156	106.6	>tr|A0A6P2ATF0|A0A6P2ATF0_9CYAN Ergothioneine biosynthesis protein EgtB (Fragment) OS=Spirulina sp. DLM2.Bin59 OX=2480215 GN=EA366_11945 PE=4 SV=1	47.4738	0
790	D.DRVLETH.L		869.457	1	869.457	869.448	10.3	206	106.52	>tr|A0A6P2AQA6|A0A6P2AQA6_9CYAN Uncharacterized protein OS=Spirulina sp. DLM2.Bin59 OX=2480215 GN=EA366_12870 PE=4 SV=1	21.8258	0
791	L.LQPPDY.P		366.686	2	732.364	732.356	10.5	515	106.06	>tr|A0A6P2AY08|A0A6P2AY08_9CYAN Bile acid beta-glucosidase (Fragment) OS=Spirulina sp. DLM2.Bin59 OX=2480215 GN=EA366_00895 PE=4 SV=1	19.125	0
792	R.IGAPH.S		494.263	1	494.263	494.272	-19.3	162	104.53	>tr|A0A6P2ATK4|A0A6P2ATK4_9CYAN Acetyl-coenzyme A synthetase OS=Spirulina sp. DLM2.Bin59 OX=2480215 GN=acs PE=3 SV=1	29.7736	0
793	Q.PLLEIQP.Q		809.476	1	809.476	809.477	-1.3	85	104.31	>tr|A0A6P2APA3|A0A6P2APA3_9CYAN FtsQ-type POTRA domain-containing protein OS=Spirulina sp. DLM2.Bin59 OX=2480215 GN=EA366_12575 PE=4 SV=1	50.1885	0
794	P.NWVINAA.A		787.41	1	787.41	787.41	0.1	57	104.27	>tr|A0A6P2AX69|A0A6P2AX69_9CYAN dTDP-4-dehydrorhamnose reductase OS=Spirulina sp. DLM2.Bin59 OX=2480215 GN=rfbD PE=3 SV=1	40.2585	0
795	I.TVHYR.V		338.182	2	675.357	675.357	0.3	102	104.07	>tr|A0A6P2AZY3|A0A6P2AZY3_9CYAN M61 family peptidase OS=Spirulina sp. DLM2.Bin59 OX=2480215 GN=EA366_05570 PE=4 SV=1	18.1868	0
796	L.TPRQR.D		329.193	2	657.378	657.379	-1.4	297	103.83	>tr|A0A6P2AK94|A0A6P2AK94_9CYAN Uncharacterized protein OS=Spirulina sp. DLM2.Bin59 OX=2480215 GN=EA366_14180 PE=4 SV=1	19.1068	0
797	N.PSLYNTFN.S		478.231	2	955.455	955.452	3.3	37	103.43	>tr|A0A6P2B1W1|A0A6P2B1W1_9CYAN DUF4114 domain-containing protein OS=Spirulina sp. DLM2.Bin59 OX=2480215 GN=EA366_02070 PE=4 SV=1	29.938	0
798	E.TRTHR.R		335.692	2	670.376	670.374	2.8	70	103.04	>tr|A0A6P2AZE6|A0A6P2AZE6_9CYAN 30S ribosomal protein S10 OS=Spirulina sp. DLM2.Bin59 OX=2480215 GN=rpsJ PE=3 SV=1	15.6612	0
799	N.AHGTF.I		532.255	1	532.255	532.251	5.9	837	103.03	>tr|A0A6P2AKC4|A0A6P2AKC4_9CYAN Uncharacterized protein OS=Spirulina sp. DLM2.Bin59 OX=2480215 GN=EA366_13985 PE=4 SV=1	22.5235	0
800	L.IASSWR.G		360.2	2	719.393	719.384	13.4	113	103.01	>tr|A0A6P2AR74|A0A6P2AR74_9CYAN Cyanoexosortase A OS=Spirulina sp. DLM2.Bin59 OX=2480215 GN=crtA PE=4 SV=1	17.2238	0
801	C.HGLP.I		423.237	1	423.237	423.235	4	100	102.74	>tr|A0A6P2AK89|A0A6P2AK89_9CYAN Isoleucine--tRNA ligase OS=Spirulina sp. DLM2.Bin59 OX=2480215 GN=ileS PE=3 SV=1	14.4325	0
802	V.QQSYPVLLDWW.A		717.853	2	1434.7	1434.71	-4.8	529	102.67	>tr|A0A6P2AJL0|A0A6P2AJL0_9CYAN Uncharacterized protein OS=Spirulina sp. DLM2.Bin59 OX=2480215 GN=EA366_15555 PE=4 SV=1	44.7551	0
803	S.QELQR.Q		337.185	2	673.362	673.363	-0.8	22	102.25	>tr|A0A6P2AV59|A0A6P2AV59_9CYAN Serine hydroxymethyltransferase OS=Spirulina sp. DLM2.Bin59 OX=2480215 GN=glyA PE=3 SV=1	12.7457	0
804	G.LTGDLPR.Y		386.228	2	771.449	771.436	16.5	185	101.73	>tr|A0A6P2AYB2|A0A6P2AYB2_9CYAN Glycosyl transferase OS=Spirulina sp. DLM2.Bin59 OX=2480215 GN=EA366_01315 PE=4 SV=1	18.1213	0

## Sheet: Sheet1
		TLMDGGIPH
		LQAGGLF
		YEALR
		LNVQQALGDR
		IAY
		QLFSQPF
		VTF
		QQPHYLENFIQA
		RVVPVQP
		SQVGVGS
		TFGHHKAG
		LSY
		NLSRFYEKMKDY
		IAPQATY
		QPLIPQ
		PLFPDY
		VYLMPI
		LFQPH
		QIEVLR
		SQTTVPF
		QFIPQ
		QFLAYKAIKEG
		QQPIIYPPPSE
		QQPVTLPDWGQ
		VTQQPLGGKAQQGG
		QPQETPPPPGQ
		QFPPQSQQ
		QIQEWQQ
		TVMPQLGVD
		QRQIR
