# Supplementary material for: Isolation, identification and in vivo antihypertensive effect of novel angiotensin I-converting enzyme (ACE) inhibitory peptides from Spirulina protein hydrolysate
Source: Royal Society of Chemistry journal article supplement (doi:10.1039/d2fo01207c), 2022-01-01
Supplement: d2fo01207c5.xlsx [file d2fo01207c5.xlsx]

## Sheet: Sheet1
NO.	peptide ID	Peptide sequence	Docking score	Source sample	Source protein
1	pep2	QPQVLLLDEPFG	-9	SK-G5R2	>tr|A0A6P2AYN9|A0A6P2AYN9_9CYAN Sulfate/thiosulfate import ATP-binding protein CysA OS=Spirulina sp. DLM2.Bin59 OX=2480215 GN=cysA PE=3 SV=1
2	pep3	EIQPGMAIDPQ	-8.9	SK-G5R2	>tr|A0A6P2AWQ0|A0A6P2AWQ0_9CYAN Uncharacterized protein (Fragment) OS=Spirulina sp. DLM2.Bin59 OX=2480215 GN=EA366_06565 PE=4 SV=1
3	pep4	TVFNHEGR	-8.8	SK-G5R2	>tr|A0A6P2AY18|A0A6P2AY18_9CYAN PAS domain S-box protein (Fragment) OS=Spirulina sp. DLM2.Bin59 OX=2480215 GN=EA366_04135 PE=3 SV=1
4	pep5	QPQPMNELIQQ	-8.7	SK-G5R2	>tr|A0A6P2AYR4|A0A6P2AYR4_9CYAN ABC transporter substrate-binding protein OS=Spirulina sp. DLM2.Bin59 OX=2480215 GN=EA366_04995 PE=4 SV=1
5	pep9	VYLMPI	-8.3	SK-G5R2	>tr|A0A6P2AWD2|A0A6P2AWD2_9CYAN Uncharacterized protein OS=Spirulina sp. DLM2.Bin59 OX=2480215 GN=EA366_06745 PE=3 SV=1
6		QPQFPT	-6.5	SK-G5R2	>tr|A0A6P2ASR3|A0A6P2ASR3_9CYAN DUF1868 domain-containing protein OS=Spirulina sp. DLM2.Bin59 OX=2480215 GN=EA366_09375 PE=4 SV=1
7		IFQPH	-6.4	SK-G5R2	>tr|A0A6P2AJ63|A0A6P2AJ63_9CYAN Long-chain fatty acid--CoA ligase OS=Spirulina sp. DLM2.Bin59 OX=2480215 GN=EA366_14405 PE=4 SV=1
8		FSGYRPQ	-6.3	SK-G5R2	>tr|A0A6P2AY86|A0A6P2AY86_9CYAN Elongation factor Tu OS=Spirulina sp. DLM2.Bin59 OX=2480215 GN=tuf PE=3 SV=1
9		ITCPLG	-5.5	SK-G5R2	>tr|A0A6P2ARG1|A0A6P2ARG1_9CYAN Gamma-glutamyl phosphate reductase OS=Spirulina sp. DLM2.Bin59 OX=2480215 GN=proA PE=3 SV=1
10		QPIGFQGDFFTS	-5.3	SK-G5R2	>tr|A0A6P2ASM3|A0A6P2ASM3_9CYAN Class I SAM-dependent methyltransferase OS=Spirulina sp. DLM2.Bin59 OX=2480215 GN=EA366_09690 PE=4 SV=1
11	pep1	KDEYKHLNFGEV	-9.2	SK-G5R3	>tr|A0A6P2AXR1|A0A6P2AXR1_9CYAN Aldehyde decarbonylase OS=Spirulina sp. DLM2.Bin59 OX=2480215 GN=EA366_05485 PE=3 SV=1
12	pep15	ILY	-6.6	SK-G5R3	>tr|A0A6P2B207|A0A6P2B207_9CYAN O-antigen ligase family protein OS=Spirulina sp. DLM2.Bin59 OX=2480215 GN=EA366_01800 PE=4 SV=1
13	pep12	TVLYEH	-6.5	SK-G5R3	>tr|A0A6P2AYQ4|A0A6P2AYQ4_9CYAN Uncharacterized protein OS=Spirulina sp. DLM2.Bin59 OX=2480215 GN=EA366_03645 PE=4 SV=1
14	pep13	QILPQ	-6.1	SK-G5R3	>tr|A0A6P2AR22|A0A6P2AR22_9CYAN Pyrroline-5-carboxylate reductase OS=Spirulina sp. DLM2.Bin59 OX=2480215 GN=proC PE=3 SV=1
15	pep14	VTGGGY	-5.9	SK-G5R3	>tr|A0A6P2ARN4|A0A6P2ARN4_9CYAN Penicillin-insensitive transglycosylase OS=Spirulina sp. DLM2.Bin59 OX=2480215 GN=EA366_11685 PE=4 SV=1
16		AIMALW	-5.4	SK-G5R3	>tr|A0A6P2AWH6|A0A6P2AWH6_9CYAN Sterol desaturase family protein OS=Spirulina sp. DLM2.Bin59 OX=2480215 GN=EA366_08520 PE=4 SV=1
17		YVPASHA	-5.3	SK-G5R3	>tr|A0A6P2ASY2|A0A6P2ASY2_9CYAN DUF928 domain-containing protein OS=Spirulina sp. DLM2.Bin59 OX=2480215 GN=EA366_08705 PE=4 SV=1
18		PFAAGLSL	-4.7	SK-G5R3	>tr|A0A6P2AQV2|A0A6P2AQV2_9CYAN SLH domain-containing protein OS=Spirulina sp. DLM2.Bin59 OX=2480215 GN=EA366_11830 PE=3 SV=1
19		ETTRSQAADLAFAIK	-4.4	SK-G5R3	>tr|A0A6P2ASQ3|A0A6P2ASQ3_9CYAN GAF domain-containing protein OS=Spirulina sp. DLM2.Bin59 OX=2480215 GN=EA366_09455 PE=4 SV=1
20		VTY	-4	SK-G5R3	>tr|A0A6P2AMN0|A0A6P2AMN0_9CYAN 2,3-bisphosphoglycerate-independent phosphoglycerate mutase OS=Spirulina sp. DLM2.Bin59 OX=2480215 GN=gpmI PE=3 SV=1
21	pep6	LNVQQALGDR	-8.7	SK-G5R5	>tr|A0A6P2AXR4|A0A6P2AXR4_9CYAN Phosphotransacetylase family protein OS=Spirulina sp. DLM2.Bin59 OX=2480215 GN=EA366_08510 PE=4 SV=1
22	pep7	QQPHYLENFIQA	-8.6	SK-G5R5	>tr|A0A6P2AV88|A0A6P2AV88_9CYAN Alpha-D-glucose phosphate-specific phosphoglucomutase OS=Spirulina sp. DLM2.Bin59 OX=2480215 GN=EA366_06855 PE=3 SV=1
23	pep8	QLFSQPF	-8.4	SK-G5R5	>tr|A0A6P2AQX8|A0A6P2AQX8_9CYAN GH3 auxin-responsive promoter OS=Spirulina sp. DLM2.Bin59 OX=2480215 GN=EA366_11265 PE=4 SV=1
24	pep10	LQAGGLF	-7.5	SK-G5R5	>tr|A0A6P2AX47|A0A6P2AX47_9CYAN Nuclear transport factor 2 family protein OS=Spirulina sp. DLM2.Bin59 OX=2480215 GN=EA366_04280 PE=4 SV=1
25	pep11	YEALR	-6.7	SK-G5R5	>tr|A0A6P2AVG3|A0A6P2AVG3_9CYAN Lysine--tRNA ligase OS=Spirulina sp. DLM2.Bin59 OX=2480215 GN=lysS PE=3 SV=1
26		RVVPVQP	-6.2	SK-G5R5	>tr|A0A6P2AX69|A0A6P2AX69_9CYAN dTDP-4-dehydrorhamnose reductase OS=Spirulina sp. DLM2.Bin59 OX=2480215 GN=rfbD PE=3 SV=1
27		SQVGVGS	-5.3	SK-G5R5	>tr|A0A6P2AQX3|A0A6P2AQX3_9CYAN Histidine kinase OS=Spirulina sp. DLM2.Bin59 OX=2480215 GN=EA366_10795 PE=4 SV=1
28		TLMDGGIPH	-5.2	SK-G5R5	>tr|A0A6P2AMP5|A0A6P2AMP5_9CYAN BMP family ABC transporter substrate-binding protein OS=Spirulina sp. DLM2.Bin59 OX=2480215 GN=EA366_12315 PE=4 SV=1
29		IAY	-4.2	SK-G5R5	>tr|A0A6P2AUX9|A0A6P2AUX9_9CYAN Glycosyltransferase family 9 protein OS=Spirulina sp. DLM2.Bin59 OX=2480215 GN=EA366_08575 PE=4 SV=1
30		VTF	-4	SK-G5R5	>tr|A0A6P2AY04|A0A6P2AY04_9CYAN Helicase (Fragment) OS=Spirulina sp. DLM2.Bin59 OX=2480215 GN=EA366_03670 PE=4 SV=1
