# Supplementary material for: Isolation, identification and in vivo antihypertensive effect of novel angiotensin I-converting enzyme (ACE) inhibitory peptides from Spirulina protein hydrolysate
Source: Royal Society of Chemistry journal article supplement (doi:10.1039/d2fo01207c), 2022-01-01
Supplement: d2fo01207c6.xlsx [file d2fo01207c6.xlsx]

## Sheet: Sheet1
peptide	original sequence	enzyme	digestion stage	final sequence	ACE inhibitor
SpH-6	TVLYEH	pepsin	gastric	TV
	TVLYEH	pepsin	gastric	LYEH	LY-
	LYEH	pepsin	gastric	L
	LYEH	pepsin	gastric	YEH	YE
	TVLYEH	chymotrypsin	Duodenal	TVLY	-VLY
	TVLYEH	chymotrypsin	Duodenal	EH
	TVLYEH	trypsin	Duodenal	——	——
SpH-7	LQAGGLF	pepsin	gastric	LQAGG	LQ
	LQAGGLF	pepsin	gastric	LF	LF
	LQAGGLF	chymotrypsin	Duodenal	LQAGGL	GL
	LQAGGLF	chymotrypsin	Duodenal	F
	LQAGGLF	chymotrypsin	Duodenal	LQ	LQ
	LQAGGLF	chymotrypsin	Duodenal	AGGLF	AG
	LQAGGLF	chymotrypsin	Duodenal	LQA	LQ
	LQAGGLF	chymotrypsin	Duodenal	GGLF	GG
	LQAGGLF	trypsin	Duodenal	——	——
